# Supplementary material for: Screening of metal ions and organocatalysts on solid support-coupled DNA oligonucleotides guides design of DNA-encoded reactions
Source: Royal Society of Chemistry journal article supplement (doi:10.1039/c9sc04708e), 2019-01-01
Supplement: c9sc04708e1.pdf [file c9sc04708e1.pdf]

## Electronic Supplementary Information

### Screening of metal ions and organocatalysts on solid support-coupled DNA oligonucleotides guides design of DNA-encoded reactions

*Marco Potowski, Florian Losch, Elena Wünnemann, Janina K. Dahmen, Silvia Chines, Andreas Brunschweiler*

*Faculty of Chemistry and Chemical Biology, TU Dortmund University, Otto-Hahn-Straße 6,  
D-44227 Dortmund, Germany*

| <b>Table of Contents</b>                                                                                                  | <b>Page</b> |
|---------------------------------------------------------------------------------------------------------------------------|-------------|
| <b>General Methods and Materials</b>                                                                                      | <b>S3</b>   |
| <b>Representative Procedures</b>                                                                                          | <b>S4</b>   |
| <b>Investigation in the stability of solid phase coupled oligonucleotides charged with metal ions and organocatalysts</b> | <b>S10</b>  |
| Table S1 Stability of DNA against metal salts                                                                             | S10         |
| Figure S1 – Representative mass spectrometric analysis of degraded DNA                                                    | S11         |
| Figure S2 – Photos of CPG-coupled DNA-oligonucleotides treated with Pd(O) and Pd(II)                                      | S12         |
| HPLC traces and MALDI-MS spectra of metal ion screens                                                                     | S13         |
| Table S2 Stability of DNA against metal salts at 40 °C                                                                    | S87         |
| Table S3 Stability of DNA against metal salts dissolved in benchtop solvents                                              | S87         |
| HPLC traces and MALDI-MS spectra of metal ion screens                                                                     | S88         |
| Table S4 Stability of DNA against organocatalysts and organic reagents                                                    | S99         |
| HPLC traces and MALDI-MS spectra of organocatalyst and organic reagents screens                                           | S102        |
| <b>Synthesis of CPG-coupled oligonucleotide-aldehyde and -aniline conjugates</b>                                          | <b>S142</b> |
| HPLC traces and MALDI-MS spectra                                                                                          | S142        |

|                                                                                              |                 |
|----------------------------------------------------------------------------------------------|-----------------|
| <b>ZnCl<sub>2</sub>-mediated aza-Diels-Alder reaction on CPG-coupled oligonucleotides</b>    | <b>S147</b>     |
| Table S5 Reaction optimization                                                               | S147            |
| Table S6 Scope of aza-Diels-Alder reaction on CPG-coupled oligonucleotide-aldehyde conjugate | S150            |
| HPLC traces and MALDI-MS spectra for products                                                | S152            |
| Table S7 Optimization of aza-Diels-Alder reaction on CPG-coupled DNA-aniline conjugate       | S171            |
| Table S8 Scope of aza-Diels-Alder reaction on CPG-coupled oligonucleotide-aniline conjugate  | S172            |
| HPLC traces and MALDI-MS spectra for products                                                | S174            |
| <br><b>(R)-(-)-BNDHP-mediated Povarov reaction on CPG-coupled DNA oligonucleotides</b>       | <br><b>S191</b> |
| Table S7 Reaction optimization                                                               | S191            |
| Table S8 Scope of the Povarov reaction                                                       | S194            |
| HPLC traces and MALDI-MS spectra of products                                                 | S196            |
| <br><b>(R)-(-)-BNDHP-mediated Biginelli reaction on CPG-coupled DNA oligonucleotides</b>     | <br><b>S222</b> |
| Table S9 Reaction optimization                                                               | S222            |
| Table S10 Scope of the Biginelli reaction                                                    | S225            |
| HPLC traces and MALDI-MS spectra of products                                                 | S226            |
| <br><b>Cheminformatic analysis</b>                                                           | <br><b>S233</b> |
| Figure S3 PCA plots of the DA-1, Enamine REAL sampled database, P and B libraries            | S234            |
| Figure S4 PMI plots of the DA-1, Enamine REAL sampled database, P and B libraries            | S234            |
| Figure S5 PCA plots of the DA-1 and DA-2 libraries                                           | S235            |
| Figure S6 PCA plots of the combined DA-1, P and B libraries vs Enamine REAL sampled database | S235            |
| <br><b>References</b>                                                                        | <br><b>S235</b> |

---

## General methods and materials

Unless otherwise noted, chemicals were purchased from *abcr*, *Acros Organics*, *Alfa Aesar*, *Fisher Scientific*, *Merck*, *Sigma Aldrich*, *TCI* and *VWR* and were used as provided without further purifications. Dry solvents ( $\text{CH}_2\text{Cl}_2$ , DMF, MeOH, ACN, EtOH, THF, toluene) were used as commercially available.

5'-Aminolinker-modified DNA oligonucleotides coupled to controlled pore glass solid support (CPG, 1000 Å porosity) were synthesized by *IBA* (Göttingen, Germany). Oligonucleotide-small molecule conjugates coupled to CPG were filtered and washed through synthesis columns using a vacuum manifold (*Vac-Man*®) from *Promega*.

**Semi-preparative ion pair RP-HPLC.** Compound purification was performed on a *Shimadzu Prominence* HPLC System equipped with a  $\text{C}_{18}$  stationary phase (*Phenomenex*, Gemini, 5 µm,  $\text{C}_{18}$ , 110 Å, 100 x 4.6 mm). A gradient from 100 mM aqueous triethylammonium acetate (pH = 8.0, eluent A) to MeOH (eluent B) was used at a flow rate of 5 mL/min. Fractions containing the desired product were pooled and concentrated.

**Method:** Step gradient of 20 % to 70 % B within 13 min, then 70 % to 100 % B within 1 min followed by 100 % B for 3 min using 100 mM aqueous triethylammonium acetate (pH = 8.0, eluent A) and MeOH (eluent B) at a flow rate of 5 mL/min.

**Analytical RP-HPLC.** HPLC analysis was performed on an *Agilent 1100 series* chromatograph equipped with 1100 Quaternary Pump (*G1311A*), a 1100 Multi-Wavelength Detector (*G1365B*) and an *Agilent Eclipse Plus*  $\text{C}_{18}$  (4.6 x 100 mm, 3.5 µm) column. The conversion and purity of DNA conjugates were determined by integration of peaks recorded at 254 nm wavelength.

**Method-I:** Step gradient of 10 % to 60 % B within 10 min, then 60 % to 100 % B within 2 min followed by 100 % B for 2 min using 10 mM aqueous triethylammonium acetate (pH = 8.0, eluent A) and MeOH (eluent B) at a flow rate of 0.6 mL/min.

**Method-II:** Step gradient of 10 % to 70 % B within 10 min, then 70 % to 100 % B within 2 min followed by 100 % B for 2 min using 10 mM aqueous triethylammonium acetate (pH = 8.0, eluent A) and MeOH (eluent B) at a flow rate of 0.6 mL/min.

**Method-III:** A linear gradient of 10 % to 100 % B within 10 min followed by 100 % B for 4 min using 10 mM aqueous triethylammonium acetate (pH 8.0, eluent A) and MeOH (eluent B) at a flow rate of 0.6 mL/min.

**MALDI-TOF.** Mass analysis was performed on a MALDI TOF/TOF MS from *Bruker Daltonics* using 2',4',6'-trihydroxyacetophenone (THAP) matrix (*Dichrom*).

## Representative procedures

### DMT-deprotection and capping of solid support-coupled hexT (RP\_01)

The DMT-protecting group of 5'-amino linker modified hexT-DNA strand coupled to 1000 Å controlled pore glass (CPG) solid support (1 µmol, ca. 36 mg) was cleaved by addition of 3% trichloroacetic acid in CH<sub>2</sub>Cl<sub>2</sub> (3x 200 µL) for 1 min (yellow to orange color indicated successful removal of protecting group). The CPG was washed with DMF (3x 200 µL), MeOH (3x 200 µL), ACN (3x 200 µL) and CH<sub>2</sub>Cl<sub>2</sub> (3x 200 µL). Deprotected CPG-coupled oligonucleotide was treated with 200 µL of capping solution (1:1 mixture of THF/methylimidazole (9:1, vol:vol) and THF/pyridine/acetic acid anhydride (8:1:1, vol:vol)) for 1 min. Finally, the CPG was washed three times with each 200 µL of DMF, MeOH, ACN and CH<sub>2</sub>Cl<sub>2</sub> and dried *in vacuo* for 15 min. Capping was repeated three times.

To assess completion of deprotection and capping, a small portion of CPG (0.7 mg) was treated with 500 µL of an AMA solution (AMA = aqueous ammonia (30%)/ aqueous methylamine (40%), 1:1, vol:vol) for 30 min at room temperature. Afterwards 20 µL of 1 M Tris buffer (pH = 7.5) were added, the mixture was dried under reduced pressure (SpeedVac) and dissolved in 100 µL of distilled water. The product was analyzed by Analytical RP-HPLC and MALDI-TOF-MS.

### DMT-deprotection of solid support-coupled 10mer DNA strands (RP\_02)

The DMT-protecting group of DNA strand coupled to 1000 Å controlled pore glass (CPG) solid support (1 µmol, ~40 mg of 10mer DNA (TC-, ATC-, ATCG-Sequences)) was cleaved by addition of 3% trichloroacetic acid in CH<sub>2</sub>Cl<sub>2</sub> (3x 200 µL) for 1 min (yellow to orange color indicated successful removal of protecting group). The CPG was washed three times with each 200 µL of DMF, MeOH, ACN and CH<sub>2</sub>Cl<sub>2</sub> and dried *in vacuo* for 15 min.

### Treatment of solid support-coupled DNA with metal salts (RP\_03)

20 nmol of CPG-coupled oligonucleotide (ca. 0.7 mg solid phase) were treated with 200 equiv. of metal salt (4 µmol) dissolved in 50 µL dry solvent. The suspension was shaken at ambient temperature for 22 h. Afterwards the solvent was removed by filtration, and the CPG was washed three times with each 200 µL of 0.1 M EDTA solution, 0.1 M MgCl<sub>2</sub> solution, water, DMF, MeOH, ACN and CH<sub>2</sub>Cl<sub>2</sub> and dried *in vacuo*.

Cleavage and analysis: DNA was deprotected and cleaved from CPG by shaking with 500 µL of an AMA solution (AMA = aqueous ammonia (30%)/ aqueous methylamine (40%), 1:1, vol:vol)



for 4 h (30 min for hexT-Ac) at room temperature. Afterwards, 20  $\mu$ L of 1 M Tris buffer (pH = 7.5) were added, the mixture was dried under reduced pressure (SpeedVac) and the DNA was dissolved in 200  $\mu$ L distilled water. The product was analyzed by Analytical RP-HPLC and MALDI-TOF-MS.

#### **Treatment of solid support-coupled DNA with organocatalysts (RP\_04)**

20 nmol of CPG-coupled oligonucleotide (ca. 0.7 mg of solid phase) were treated with 200 equiv. of organocatalyst (4  $\mu$ mol) dissolved in 50  $\mu$ L dry solvent. The suspension was shaken at ambient temperature for 22 h. Afterwards, the solvent was removed by filtration, the CPG was washed three times with each 0.1 M  $\text{MgCl}_2$  solution, water, DMF, MeOH, ACN and  $\text{CH}_2\text{Cl}_2$  and dried *in vacuo*.

Cleavage and analysis: DNA was deprotected and cleaved from CPG by shaking in 500  $\mu$ L of an AMA solution (AMA = aqueous ammonia (30%)/ aqueous methylamine (40%), 1:1, vol/vol) for 4 h (30 min for hexT-Ac) at room temperature. Afterwards 20  $\mu$ L of 1 M Tris buffer (pH = 7.5) were added, the mixture was dried under reduced pressure (SpeedVac) and DNA was dissolved in 200  $\mu$ L distilled water. The product was analyzed by Analytical RP-HPLC and MALDI-TOF-MS.

#### **Treatment of solid support-coupled DNA with acids (RP\_05)**

20 nmol of CPG-coupled oligonucleotide (ca. 0.7 mg of solid phase) were treated with 50  $\mu$ L acid. The suspension was shaken at ambient temperature for 22 h. Afterwards solution was removed by filtration, and the CPG was washed three times with each 200  $\mu$ L of 0.1 M  $\text{MgCl}_2$  solution, water, DMF, MeOH, ACN and  $\text{CH}_2\text{Cl}_2$  and dried *in vacuo*.

Cleavage and analysis: DNA was deprotected and cleaved from CPG by shaking in 500  $\mu$ L of an AMA solution (AMA = aqueous ammonia (30%)/ aqueous methylamine (40%), 1:1, vol/vol) for 4 h (30 min for hexT-Ac) at room temperature. Afterwards 20  $\mu$ L of 1 M Tris buffer (pH = 7.5) were added, the mixture was dried under reduced pressure (SpeedVac) and dissolved in 200  $\mu$ L of distilled water. The product was analyzed by Analytical RP-HPLC and MALDI-TOF-MS.

## Amide coupling (RP-06)

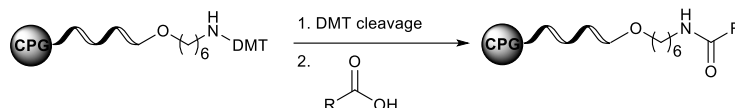

**Step 1:** The DMT-protecting group of CPG-coupled oligonucleotide (250 nmol, ca. 10 mg of solid phase material) was removed by addition of 200  $\mu\text{L}$  3 % trichloroacetic acid in  $\text{CH}_2\text{Cl}_2$  for 1 min. Orange coloring of the solution indicated successful removal of protecting group. The deprotection was repeated 3-5 times until no further coloring of the solution was observed. The CPG-coupled deprotected DNA was washed three times with each 200  $\mu\text{L}$  of 1 % TEA in ACN, DMF, MeOH, ACN and  $\text{CH}_2\text{Cl}_2$  and dried *in vacuo*.

### **Step 2:**

CPG-coupled oligonucleotide, carboxylic acid and HATU were dried *in vacuo* for 15 min. Stock solutions of all reactants in dry DMF were prepared before the reaction was started. To the solution of carboxylic acid (25  $\mu\text{mol}$ , 100 equiv.) in 75  $\mu\text{L}$  dry DMF, HATU (25  $\mu\text{mol}$ , 100 equiv.) dissolved in 75  $\mu\text{L}$  dry DMF and DIPEA (62.5  $\mu\text{mol}$ , 250 equiv.) were added. The mixture was shaken for 5 min and added to CPG-coupled DNA suspended in 75  $\mu\text{L}$  dry DMF (250 nmol, 1 equiv.). The amide coupling reaction was shaken at ambient temperature for 2 hours. Next, the CPG-coupled conjugate was filtered over a filter column, washed three times with each 200  $\mu\text{L}$  of DMF, MeOH, ACN and  $\text{CH}_2\text{Cl}_2$  and dried *in vacuo*. Amide coupling was repeated two times.

Completion of amide coupling was controlled by cleaving off a small portion of CPG-coupled oligonucleotide conjugate (0.7–0.9 mg, ~20 nmol) with 500  $\mu\text{L}$  AMA (AMA = aqueous ammonia (30 %)/ aqueous methylamine (40 %), 1:1, vol/vol) for 30 min (hexT) or 4 h (ATGC-sequences) at ambient temperature. Afterwards 20  $\mu\text{L}$  of 1 M Tris buffer (pH = 7.5) were added, the mixture was dried under reduced pressure (SpeedVac) and DNA was dissolved in 200  $\mu\text{L}$  distilled water. The crude reaction mixture was analyzed by analytical RP-HPLC and MALDI-MS. In case of uncompleted coupling (<90%) the reaction was repeated a third time.

Unreacted amines were capped with acetic acid anhydride (three times 200  $\mu\text{L}$ , 30 s, 1:1 mixture of THF/methylimidazole, 9:1, vol/vol, and THF/pyridine/acetic acid anhydride 8:1:1, vol/vol). The capped CPG-coupled oligonucleotide conjugate was washed three times with each 200  $\mu\text{L}$  of DMF, MeOH, ACN and  $\text{CH}_2\text{Cl}_2$  and dried *in vacuo*.

### aza-Diels-Alder reaction with Danishefsky's diene on CPG-coupled oligonucleotide-aldehyde conjugates (RP-07)

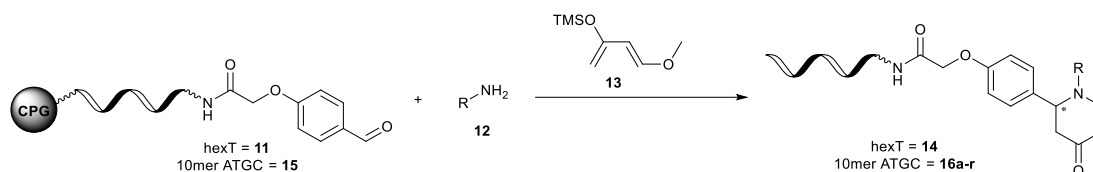

Prior to reaction, CPG-coupled oligonucleotide, solid amines and  $ZnCl_2$  were dried *in vacuo* for 15 min. Amine **14** (10  $\mu$ mol, 500 equiv.) was dissolved in 24  $\mu$ L acetonitrile. The solution was added to CPG-coupled oligonucleotide-aldehyde conjugate **13** (20 nmol) suspended in 12  $\mu$ L triethyl orthoformate. The suspension was shaken at ambient temperature for 4 h. Afterwards 30  $\mu$ L of  $ZnCl_2$  (2  $\mu$ mol, 100 equiv.) in ACN followed by Danishefsky's diene **15** (20  $\mu$ mol, 1000 equiv.) was added. The reaction mixture was shaken for 1 h at ambient temperature. Then the CPG-coupled oligonucleotide conjugate was filtered over a filter column, washed three times with each 200  $\mu$ L of 0.1 M EDTA solution, 0.1 M  $MgCl_2$  solution, water, DMF, MeOH, ACN and  $CH_2Cl_2$  and dried *in vacuo*. CPG-coupled oligonucleotide conjugates **16-19** (**16** = hexT, **18** = 10mer ATGC) were cleaved from solid support and deprotected with 200  $\mu$ L aqueous ammonia (30 %) at 50  $^{\circ}C$  for 6 h. Afterwards 20  $\mu$ L of 1 M Tris buffer (pH = 7.5) were added, the mixture was dried under reduced pressure (SpeedVac) and DNA was dissolved in 200  $\mu$ L distilled water. The crude reaction mixture was analyzed by analytical RP-HPLC (Method I) and MALDI-TOF-MS. The product was purified by preparative RP-HPLC.

### aza-Diels-Alder reaction with Danishefsky's diene on CPG-coupled oligonucleotide-aniline conjugates (RP-08)

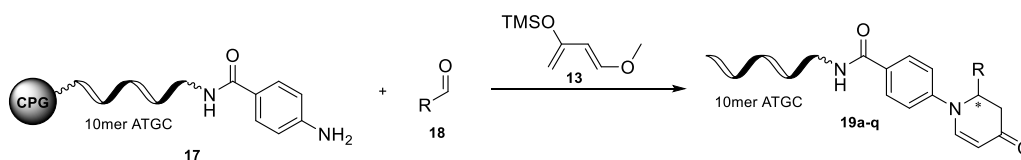

Prior to reaction, CPG-coupled oligonucleotide, solid aldehydes and  $ZnCl_2$  were dried *in vacuo* for 15 min. Aldehyde **14** (30  $\mu$ mol, 1500 equiv.) was dissolved in 24  $\mu$ L tetrahydrofuran. The solution was added to CPG-coupled oligonucleotide-aniline conjugate **13** (20 nmol) suspended in 12  $\mu$ L triethyl orthoformate. The suspension was shaken at ambient temperature for 4 h. Afterwards 30  $\mu$ L of  $ZnCl_2$  (2  $\mu$ mol, 100 equiv.) in tetrahydrofuran followed by Danishefsky's diene **15** (20  $\mu$ mol, 1000 equiv.) were added. The reaction mixture was shaken at ambient temperature for 1 h. Then the CPG-coupled oligonucleotide conjugate was filtered over a filter column, washed three times with each 200  $\mu$ L of 0.1 M EDTA solution, 0.1 M  $MgCl_2$  solution,

water, DMF, MeOH, ACN and  $\text{CH}_2\text{Cl}_2$  and dried *in vacuo*. CPG-coupled oligonucleotide conjugates **16** and **19** (**16** = hexT, **19** = 10mer ATGC) were cleaved from solid support and deprotected with 200  $\mu\text{L}$  aqueous ammonia (30 %) at 50  $^\circ\text{C}$  for 6 h. Afterwards, 20  $\mu\text{L}$  of 1 M Tris buffer (pH = 7.5) were added, the mixture was dried under reduced pressure (SpeedVac) and DNA was dissolved in 200  $\mu\text{L}$  distilled water. The crude reaction mixture was analyzed by analytical RP-HPLC (Method I) and MALDI-TOF-MS. The product was purified by preparative RP-HPLC.

### (R)-(-)-BNDHP-mediated Povarov reaction on CPG-coupled oligonucleotides (RP-09)

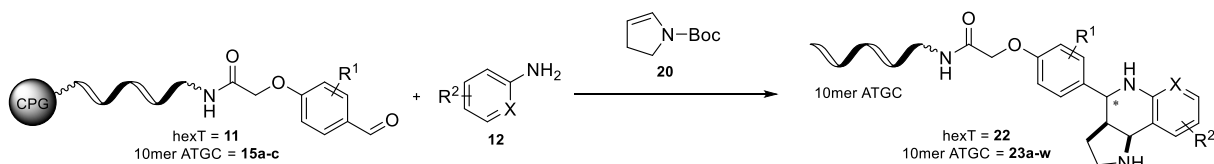

Prior to use, CPG-coupled oligonucleotide, solid anilines and (R)-(-)-BNDHP were dried *in vacuo* for 15 min. Aniline **12** (10  $\mu\text{mol}$ , 500 equiv.) was dissolved in 24  $\mu\text{L}$  ethanol. The solution was added to CPG-coupled oligonucleotide-aldehyde conjugate **15** (20 nmol) suspended in 12  $\mu\text{L}$  triethyl orthoformate. The suspension was shaken at ambient temperature for 4 h. Afterwards 30  $\mu\text{L}$  of (R)-(-)-BNDHP (2  $\mu\text{mol}$ , 100 equiv.) in ethanol followed by *N*-Boc-2,3-dihydro-1H-pyrrole **20** (10  $\mu\text{mol}$ , 500 equiv.) were added. The reaction mixture was shaken at 50  $^\circ\text{C}$  for 16 h. Then the CPG-coupled oligonucleotide conjugate was filtered over a filter column, washed three times with each DMF, MeOH, ACN and  $\text{CH}_2\text{Cl}_2$  and dried *in vacuo*. Boc-protecting group was removed by addition of 200  $\mu\text{L}$  75 % trifluoroacetic acid in  $\text{CH}_2\text{Cl}_2$  for 30 sec.. Afterwards CPG-coupled DNA was washed with excess of 1 % TEA and  $\text{CH}_2\text{Cl}_2$ . The deprotection was repeated 4 times. The solid phase was washed three times with each 200  $\mu\text{L}$  of 1 % TEA in ACN, DMF, MeOH, ACN and  $\text{CH}_2\text{Cl}_2$  and dried *in vacuo*. CPG-coupled oligonucleotide conjugates **22-23** were cleaved from solid support and deprotected with 500  $\mu\text{L}$  AMA (AMA = aqueous ammonia (30 %)/aqueous methylamine (40 %), 1:1, vol/vol) for 30 min (hexT **22**) or 4 h (ATGC-sequences **23**) at ambient temperature. Afterwards 20  $\mu\text{L}$  of 1 M Tris buffer (pH = 7.5) were added, the mixture was dried under reduced pressure (SpeedVac) and DNA was dissolved in 200  $\mu\text{L}$  distilled water. The crude reaction mixture was analyzed by analytical RP-HPLC (Method I) and MALDI-TOF-MS. The product was purified by preparative RP-HPLC.

### (R)-(-)-BNDHP-mediated Biginelli reaction on CPG-coupled oligonucleotides (RP-10)

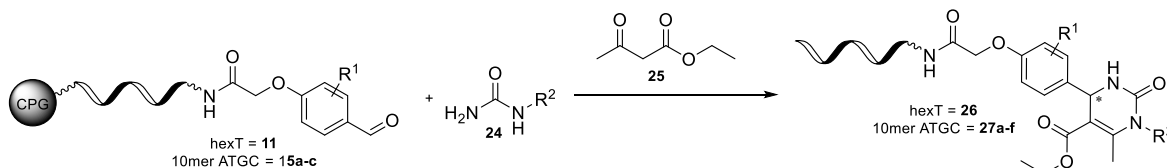

Prior to reaction, CPG-coupled oligonucleotide, ureas and (R)-(-)-BNDHP were dried *in vacuo* for 15 min. Urea **24** (10  $\mu$ mol, 500 equiv.) and (R)-(-)-BNDHP (1  $\mu$ mol, 50 equiv.) were dissolved both in 30  $\mu$ L ethanol. The solutions were added to CPG-coupled oligonucleotide-aldehyde conjugate **15** (20 nmol) followed by ethyl acetoacetate **25** (10  $\mu$ mol, 500 equiv.). The reaction mixture was shaken at 50 °C for 20 h. Then the CPG-coupled oligonucleotide conjugate was filtered over a filter column, washed three times with each DMF, MeOH, ACN and CH<sub>2</sub>Cl<sub>2</sub> and dried *in vacuo*. CPG-coupled oligonucleotide conjugates **26-27** were cleaved from solid support and deprotected with 500  $\mu$ L AMA (AMA = aqueous ammonia (30 %)/ aqueous methylamine (40 %), 1:1, vol/vol) for 30 min (hexT **26**) or 4 h (ATGC-sequences **27**) at ambient temperature. Afterwards 20  $\mu$ L of 1 M Tris buffer (pH = 7.5) were added, the mixture was dried under reduced pressure (SpeedVac) and DNA was dissolved in 200  $\mu$ L distilled water. The crude reaction mixture was analyzed by analytical RP-HPLC (Method I) and MALDI-TOF-MS. The product was purified by preparative RP-HPLC.

# Investigation in the stability of solid phase coupled oligonucleotides charged with metal ions and organocatalysts

**Table S1** – Stability of DNA against metal salts<sup>a</sup>

| Entry            | Metal salt                                                        | Solvent                         | hexT-Ac | TC | ATC | ATCG |
|------------------|-------------------------------------------------------------------|---------------------------------|---------|----|-----|------|
| 1                | 2% TFA                                                            |                                 |         |    |     |      |
| 2                | 10% TFA                                                           |                                 |         |    |     |      |
| 3                | 3.7% HCl                                                          |                                 |         |    |     |      |
| 4                | AgOAc                                                             | CH <sub>2</sub> Cl <sub>2</sub> |         |    |     |      |
| 5                | AgOTf                                                             | ACN                             |         |    |     |      |
| 6                | AgSbF <sub>6</sub>                                                | ACN                             |         |    |     |      |
| 7 <sup>b</sup>   | BiBr <sub>3</sub>                                                 | ACN                             |         |    |     |      |
| 8                | Bi(OTf) <sub>3</sub>                                              | MeOH                            |         |    |     |      |
| 9                | Ce(NH <sub>4</sub> ) <sub>2</sub> (NO <sub>3</sub> ) <sub>6</sub> | MeOH                            |         |    |     |      |
| 10               | Co(acac) <sub>3</sub>                                             | ACN                             |         |    |     |      |
| 11 <sup>b</sup>  | CuCl                                                              | MeOH                            |         |    |     |      |
| 12               | Cu(MeCN) <sub>4</sub> PF <sub>6</sub>                             | ACN                             |         |    |     |      |
| 13               | Cu(OTf) <sub>2</sub>                                              | ACN                             |         |    |     |      |
| 14               | Fe(acac) <sub>3</sub>                                             | ACN                             |         |    |     |      |
| 15               | FeCl <sub>2</sub> • 4 H <sub>2</sub> O                            | ACN                             |         |    |     |      |
| 16               | InCl <sub>3</sub>                                                 | ACN                             |         |    |     |      |
| 17 <sup>b</sup>  | La(O <i>i</i> -Pr) <sub>3</sub>                                   | THF                             |         |    |     |      |
| 18               | LiBr                                                              | ACN                             |         |    |     |      |
| 19               | Mg(ClO <sub>4</sub> ) <sub>2</sub>                                | MeOH                            |         |    |     |      |
| 20               | Ni(acac) <sub>2</sub>                                             | ACN                             |         |    |     |      |
| 21               | Ni(PPh <sub>3</sub> ) <sub>2</sub> Cl <sub>2</sub>                | MeOH                            |         |    |     |      |
| 22 <sup>b</sup>  | Pd(dba) <sub>3</sub>                                              | MeOH                            |         |    |     |      |
| 23a              | Pd(OAc) <sub>2</sub>                                              | ACN                             |         |    |     |      |
| 23b <sup>c</sup> | Pd(OAc) <sub>2</sub>                                              | ACN                             |         |    |     |      |
| 24 <sup>c</sup>  | Pd(PPh <sub>3</sub> ) <sub>4</sub>                                | MeOH                            |         |    |     |      |
| 25 <sup>b</sup>  | [Rh(cod)Cl] <sub>2</sub>                                          | MeOH                            |         |    |     |      |
| 26               | RuCl <sub>3</sub>                                                 | ACN                             |         |    |     |      |
| 27               | [Ru( <i>p</i> -cymene)Cl <sub>2</sub> ] <sub>2</sub>              | CH <sub>2</sub> Cl <sub>2</sub> |         |    |     |      |
| 28               | Ru(Me-allyl) <sub>2</sub> (COD)                                   | CH <sub>2</sub> Cl <sub>2</sub> |         |    |     |      |
| 29               | Grubbs 1 <sup>st</sup> Gen.                                       | CH <sub>2</sub> Cl <sub>2</sub> |         |    |     |      |
| 30               | SbCl <sub>3</sub>                                                 | ACN                             |         |    |     |      |
| 31               | Sc(OTf) <sub>3</sub>                                              | ACN                             |         |    |     |      |
| 32               | SeO <sub>2</sub>                                                  | MeOH                            |         |    |     |      |
| 33               | Ti(O <i>i</i> -Pr) <sub>4</sub>                                   | MeOH                            |         |    |     |      |
| 34               | VO(acac) <sub>2</sub>                                             | MeOH                            |         |    |     |      |
| 35               | Yb(OTf) <sub>3</sub>                                              | MeOH                            |         |    |     |      |
| 36               | ZnCl <sub>2</sub>                                                 | ACN                             |         |    |     |      |

<sup>a</sup> for each: 20 nmol DNA, 200 eq. transition metal salt, 50 µL solvent, r.t., 22 h. <sup>b</sup> poor solubility, added as suspension.

<sup>c</sup> 5 equiv. of metal salt were used.. ACN = acetonitrile, MeOH = methanol, THF = tetrahydrofuran.

|       |        |        |       | DNA degradation |
|-------|--------|--------|-------|-----------------|
| 0-20% | 21-40% | 41-60% | > 61% |                 |

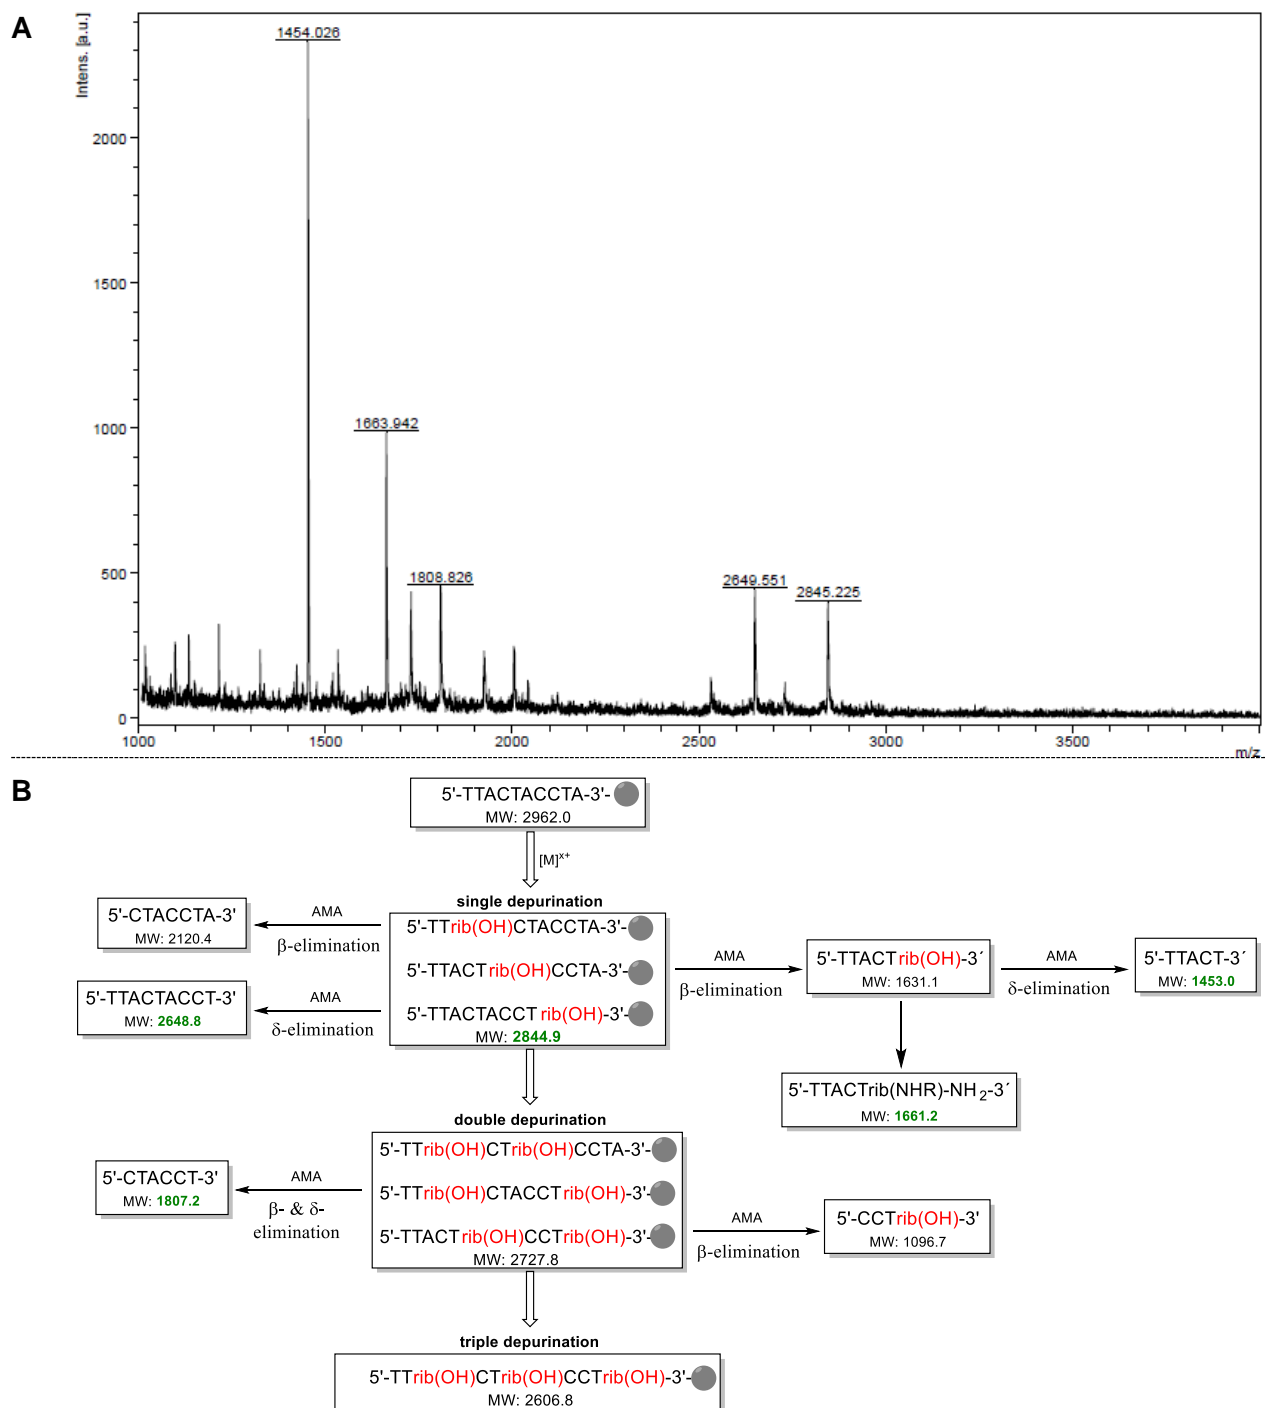

**Figure S1** Representative mass spectrometric analysis of degraded DNA. A: MALDI-TOF spectrum for 10mer ATC-oligonucleotide **9** after treatment with aqueous 3.7% HCl. B: Possible depurination and fragmentation products of 10mer ATC-oligonucleotide **9**.

A

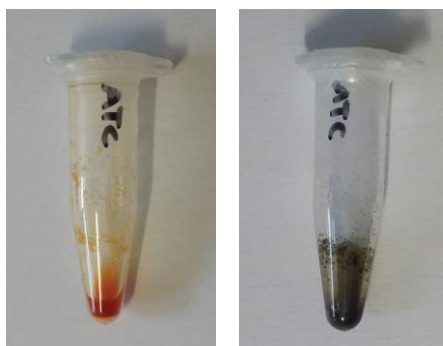

Pd(PPh<sub>3</sub>)<sub>4</sub>, 3 h

Pd(PPh<sub>3</sub>)<sub>4</sub>, 22 h

Colouring of the Pd(PPh<sub>3</sub>)<sub>4</sub> solution indicated redox processes which are plausible as all experiments were performed without protective gas.

B

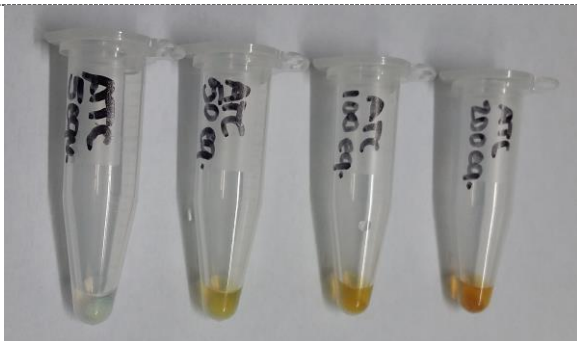

5 equiv.

50 equiv.

100 equiv.

200 equiv.

CPG-coupled DNA suspended in a solution of x equiv. Pd(OAc)<sub>2</sub> for 0 h at ambient temperature.

C

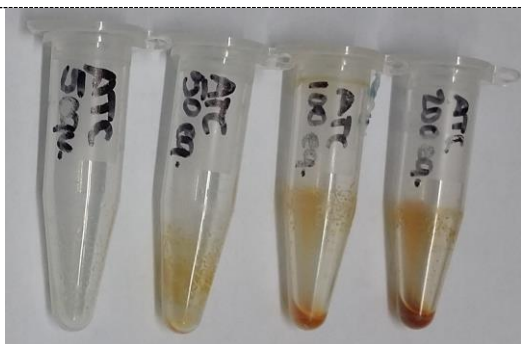

5 equiv.

50 equiv.

100 equiv.

200 equiv.

CPG-coupled DNA suspended in a solution of x equiv. Pd(OAc)<sub>2</sub> for 22 h at ambient temperature.

D

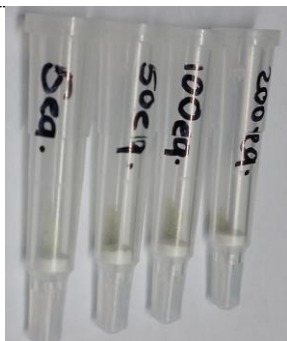

5 equiv.

50 equiv.

100 equiv.

200 equiv.

CPG-coupled DNA after incubation with a solution of x equiv. Pd(TFA)<sub>2</sub>, for 22 h at ambient temperature and multiple washing steps. Slight coloring of CPG treated with higher amounts of Pd(OAc)<sub>2</sub> is observable.

**Figure S2** Photos of CPG-coupled DNA-oligonucleotides treated with Pd(O) and Pd(II).



## HPLC traces and MALDI-MS spectra of metal ion screens

### CPG-oligonucleotide + 2% TFA

According to the representative procedure (RP-05) solid support coupled oligonucleotide (20 nmol) was treated with 2% TFA.

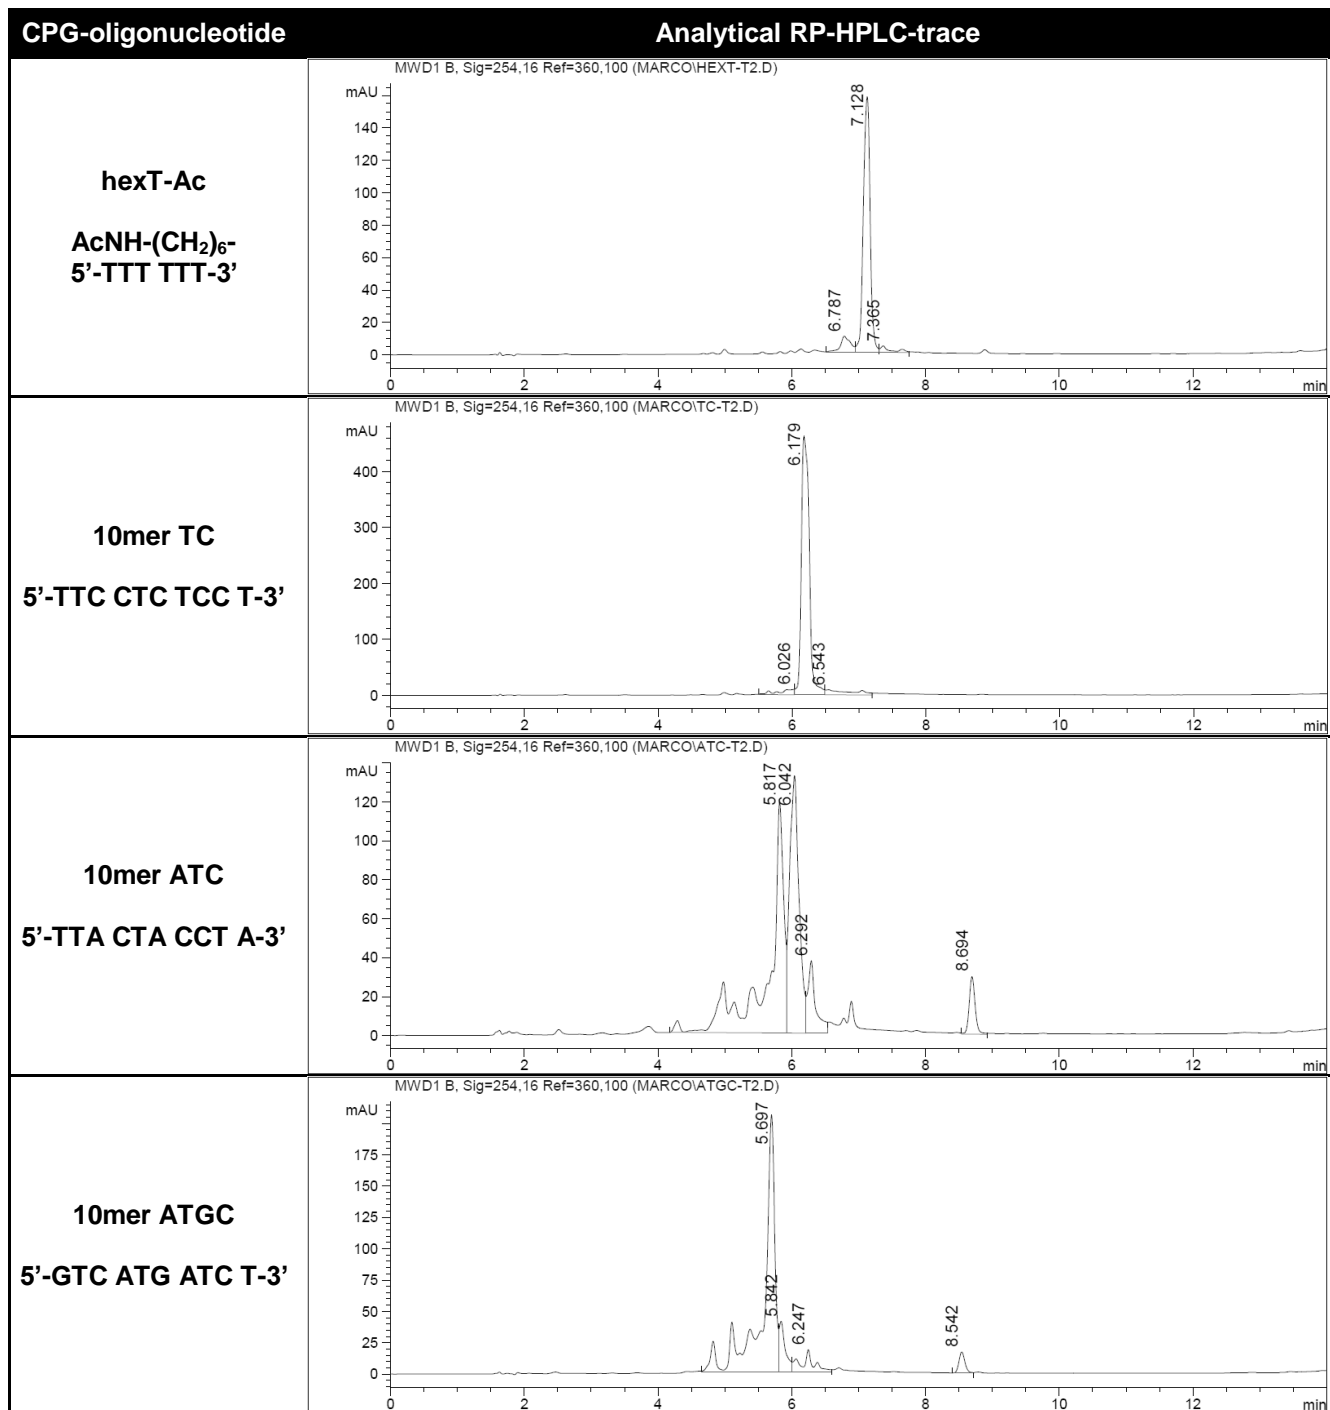

## CPG-oligonucleotide

## MALDI-MS spectra

hexT-Ac

AcNH-(CH<sub>2</sub>)<sub>6</sub>-  
5'-TTT TTT-3'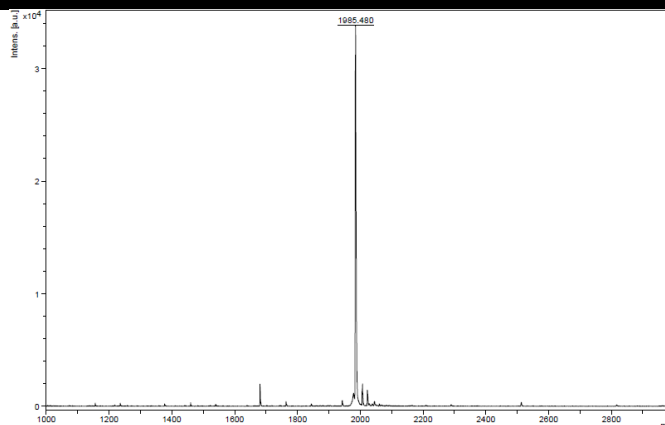mass calc. = 1985.4  
mass found = 1985.5

10mer TC

5'-TTC CTC TCC T-3'

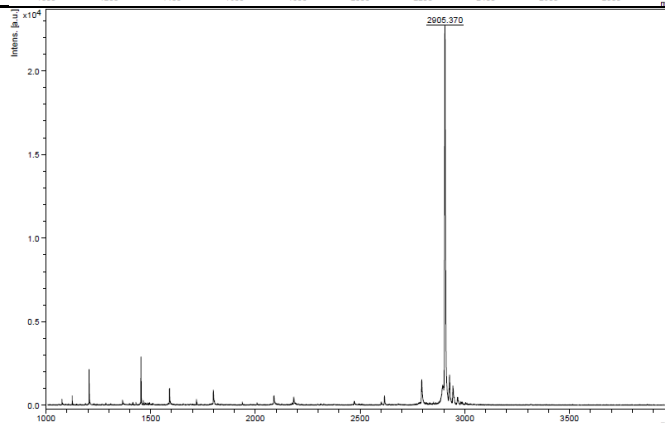mass calc. = 2904.9  
mass found = 2905.4

10mer ATC

5'-TTA CTA CCT A-3'

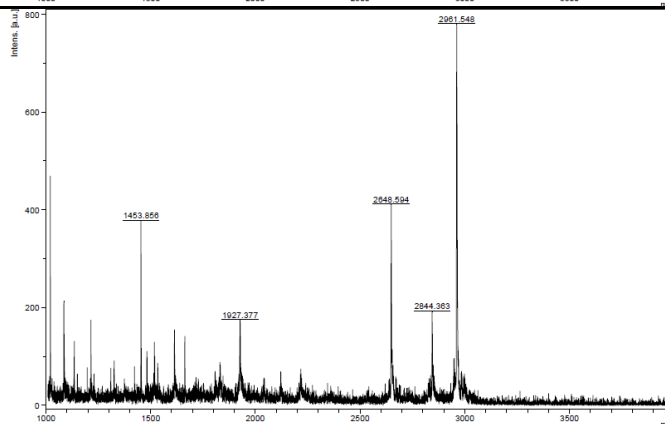mass calc. = 2962.0  
mass found = 2961.6

10mer ATGC

5'-GTC ATG ATC T-3'

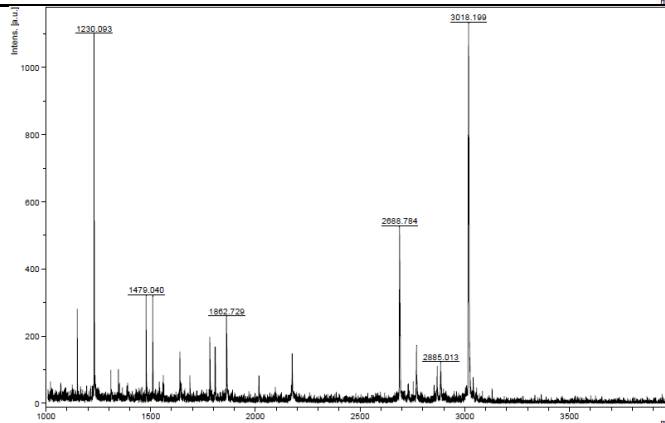mass calc. = 3019.0  
mass found = 3018.2

## CPG-oligonucleotide + 10 % TFA

According to the representative procedure (RP-05) solid support coupled oligonucleotide (20 nmol) was treated with 10 % TFA.

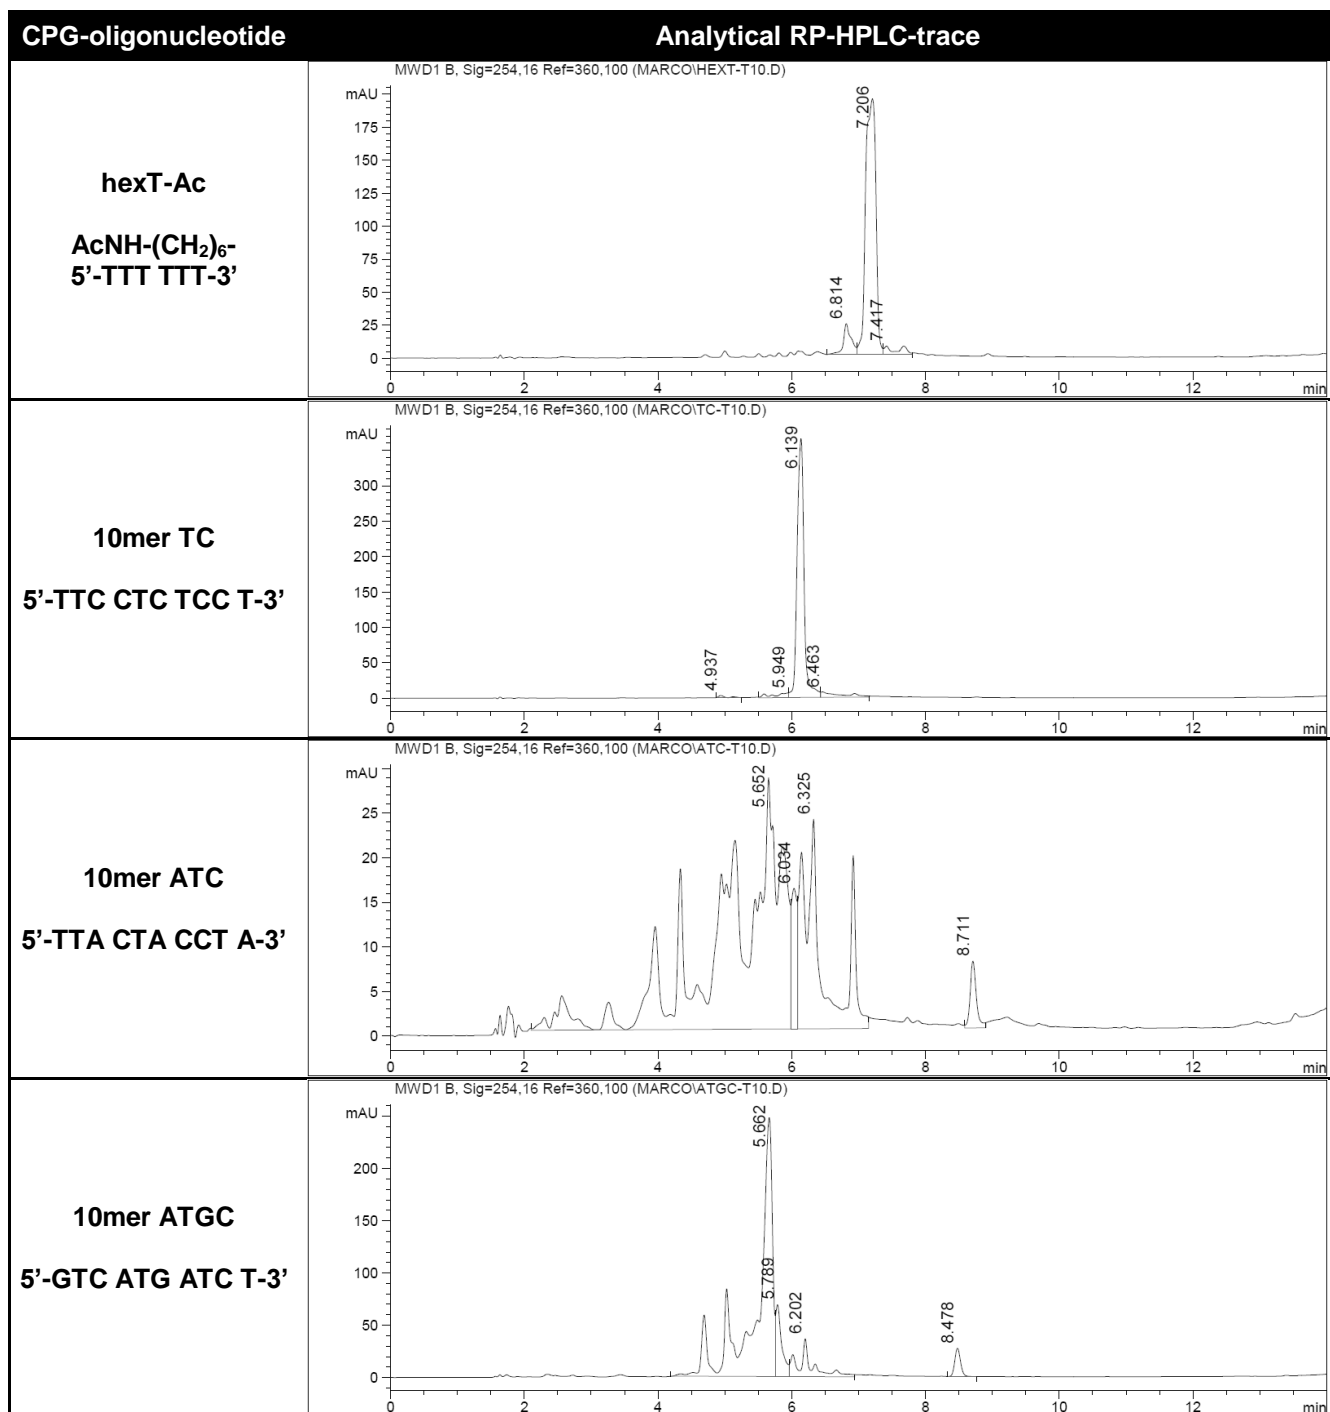

## CPG-oligonucleotide

## MALDI-MS spectra

hexT-Ac

AcNH-(CH<sub>2</sub>)<sub>6</sub>-  
5'-TTT TTT-3'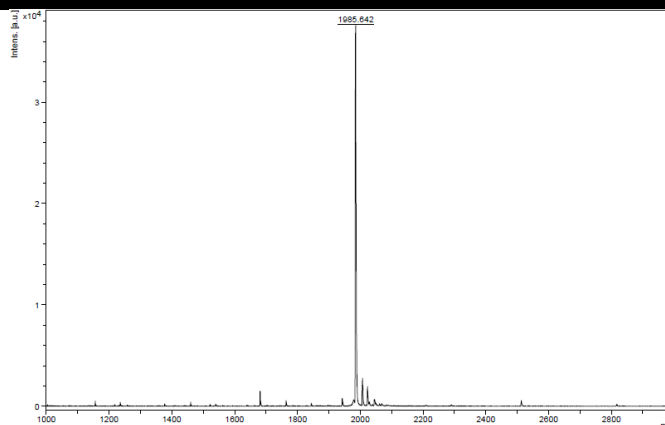mass calc. = 1985.4  
mass found = 1985.6

10mer TC

5'-TTC CTC TCC T-3'

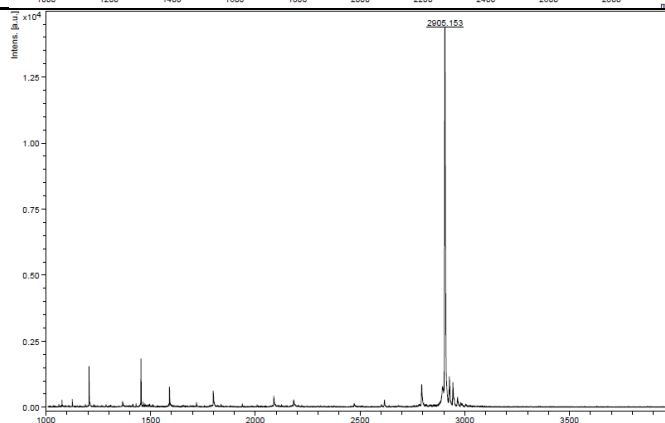mass calc. = 2904.9  
mass found = 2905.2

10mer ATC

5'-TTA CTA CCT A-3'

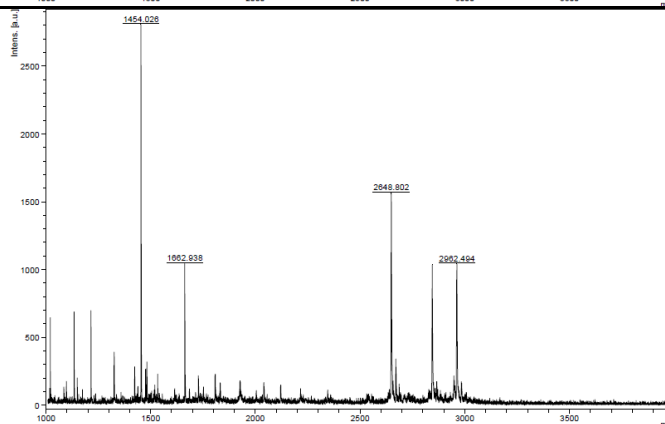mass calc. = 2962.0  
mass found = 2962.5

10mer ATGC

5'-GTC ATG ATC T-3'

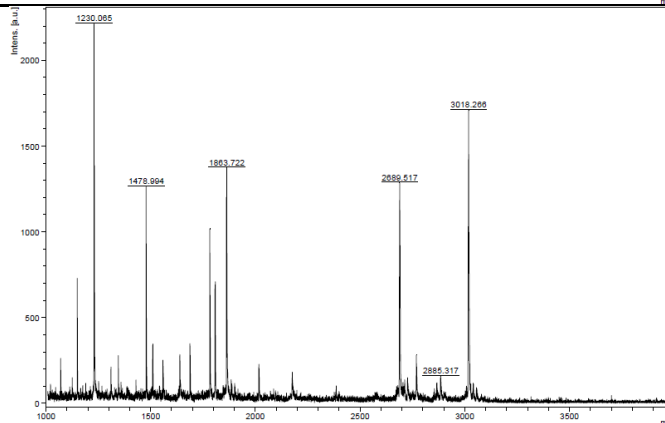mass calc. = 3019.0  
mass found = 3018.3

## CPG-oligonucleotide + 3.7% HCl

According to the representative procedure (RP-05) solid support coupled oligonucleotide (20 nmol) was treated with 3.7% HCl.

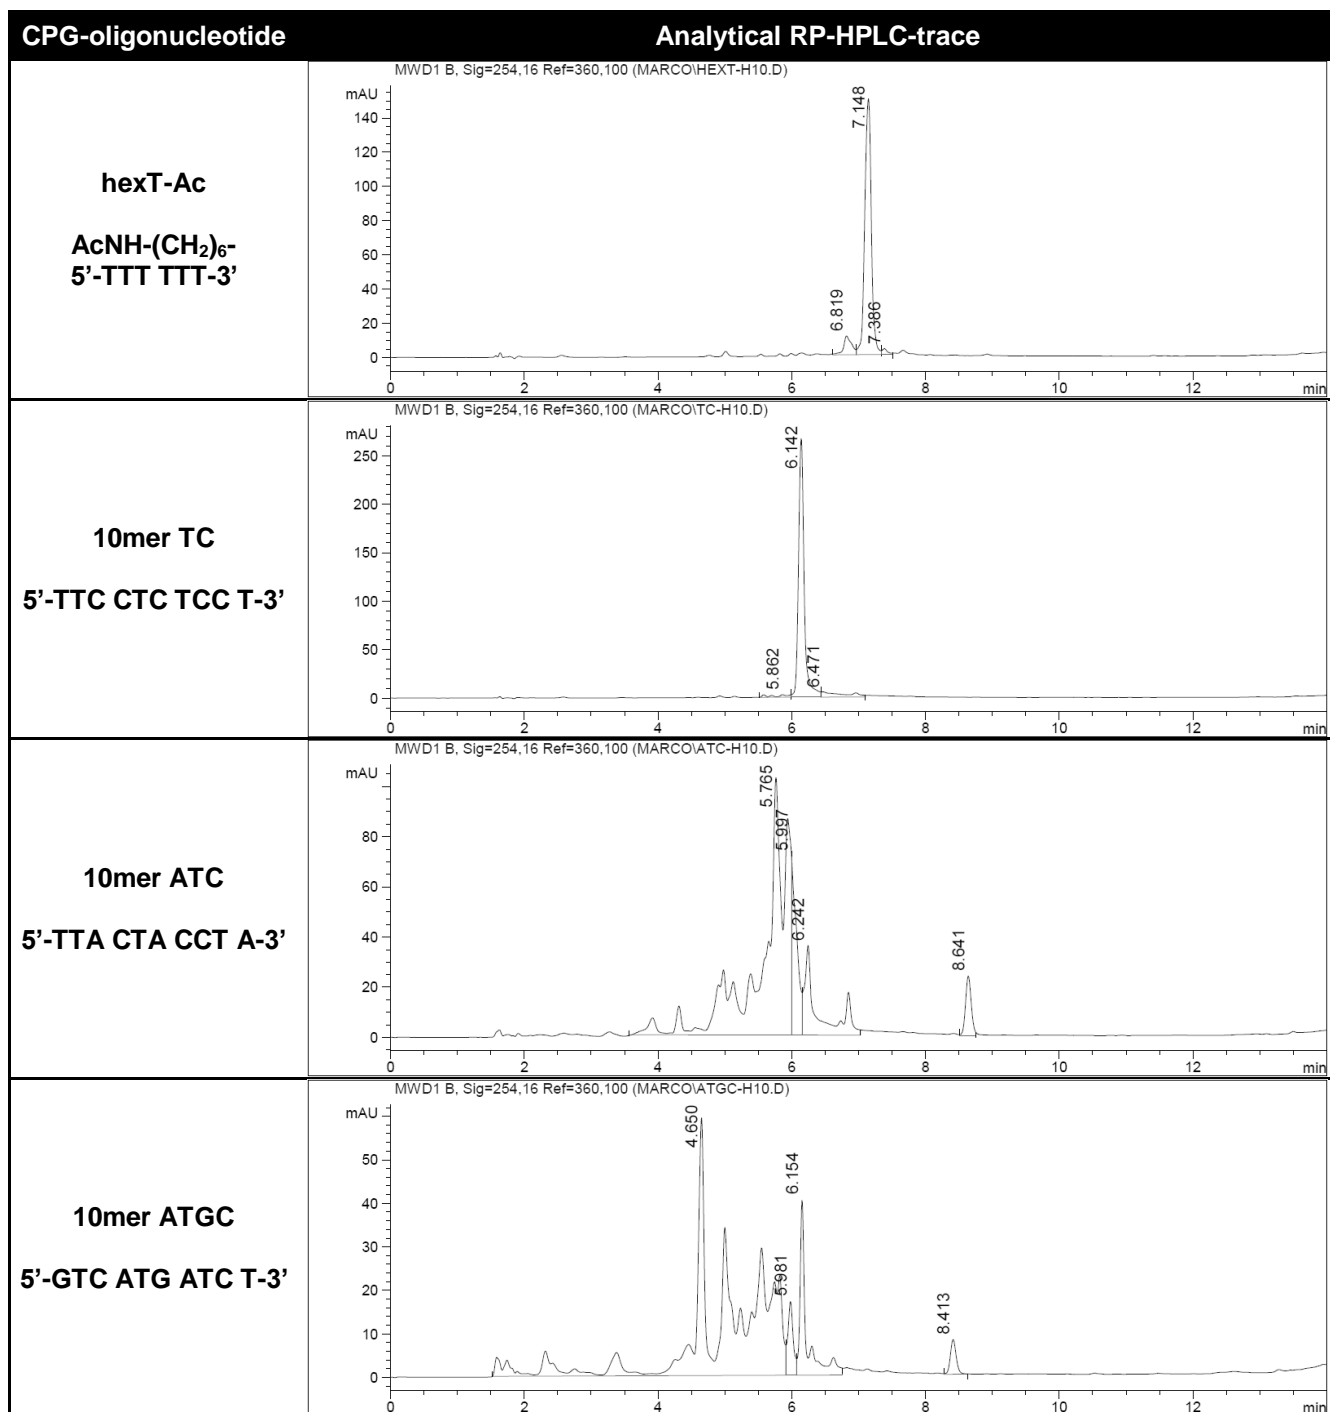

## CPG-oligonucleotide

## MALDI-MS spectra

hexT-Ac

 $\text{AcNH}-(\text{CH}_2)_6-$   
5'-TTT TTT-3'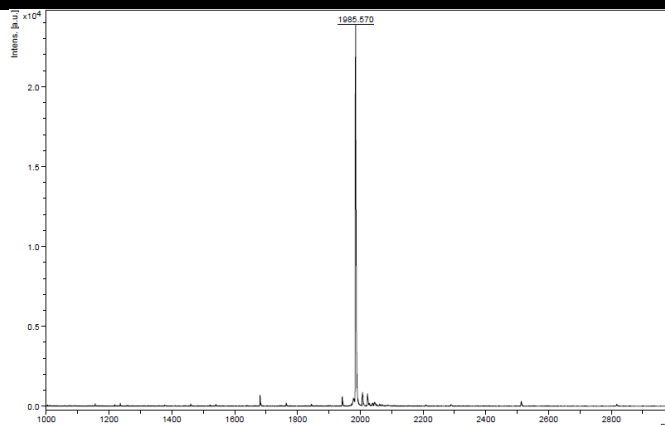mass calc. = 1985.4  
mass found = 1985.6

10mer TC

5'-TTC CTC TCC T-3'

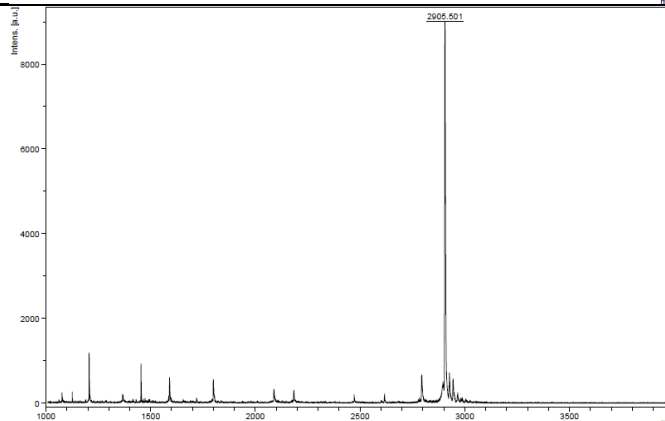mass calc. = 2904.9  
mass found = 2905.5

10mer ATC

5'-TTA CTA CCT A-3'

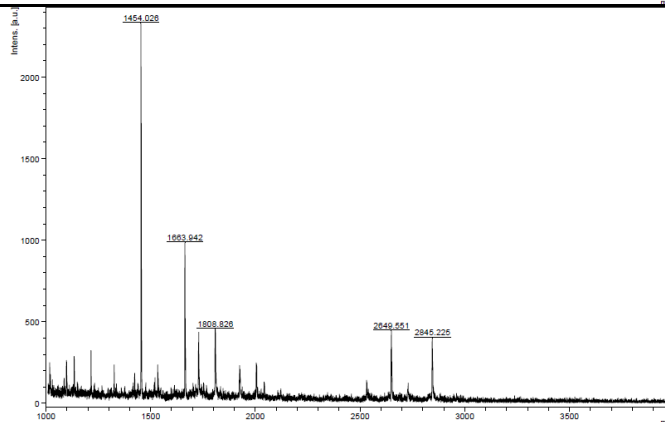mass calc. = 2962.0  
mass found = n.d.

10mer ATGC

5'-GTC ATG ATC T-3'

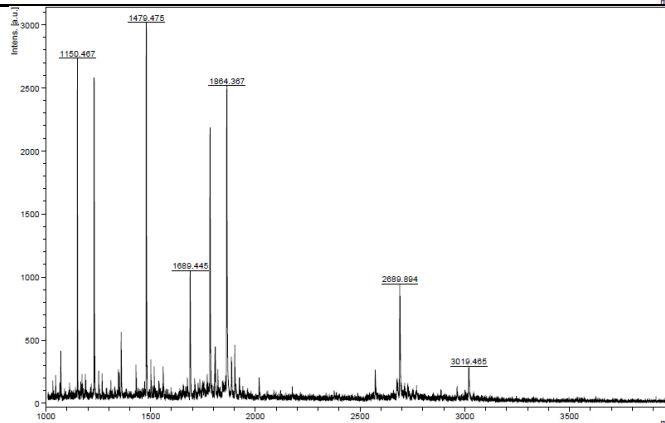mass calc. = 3019.0  
mass found = 3019.5

## CPG-oligonucleotide + AgOAc

According to the representative procedure (RP-03) solid support coupled oligonucleotide (20 nmol) was treated with AgOAc (200 equiv., 4  $\mu$ mol) in dry  $\text{CH}_2\text{Cl}_2$ .

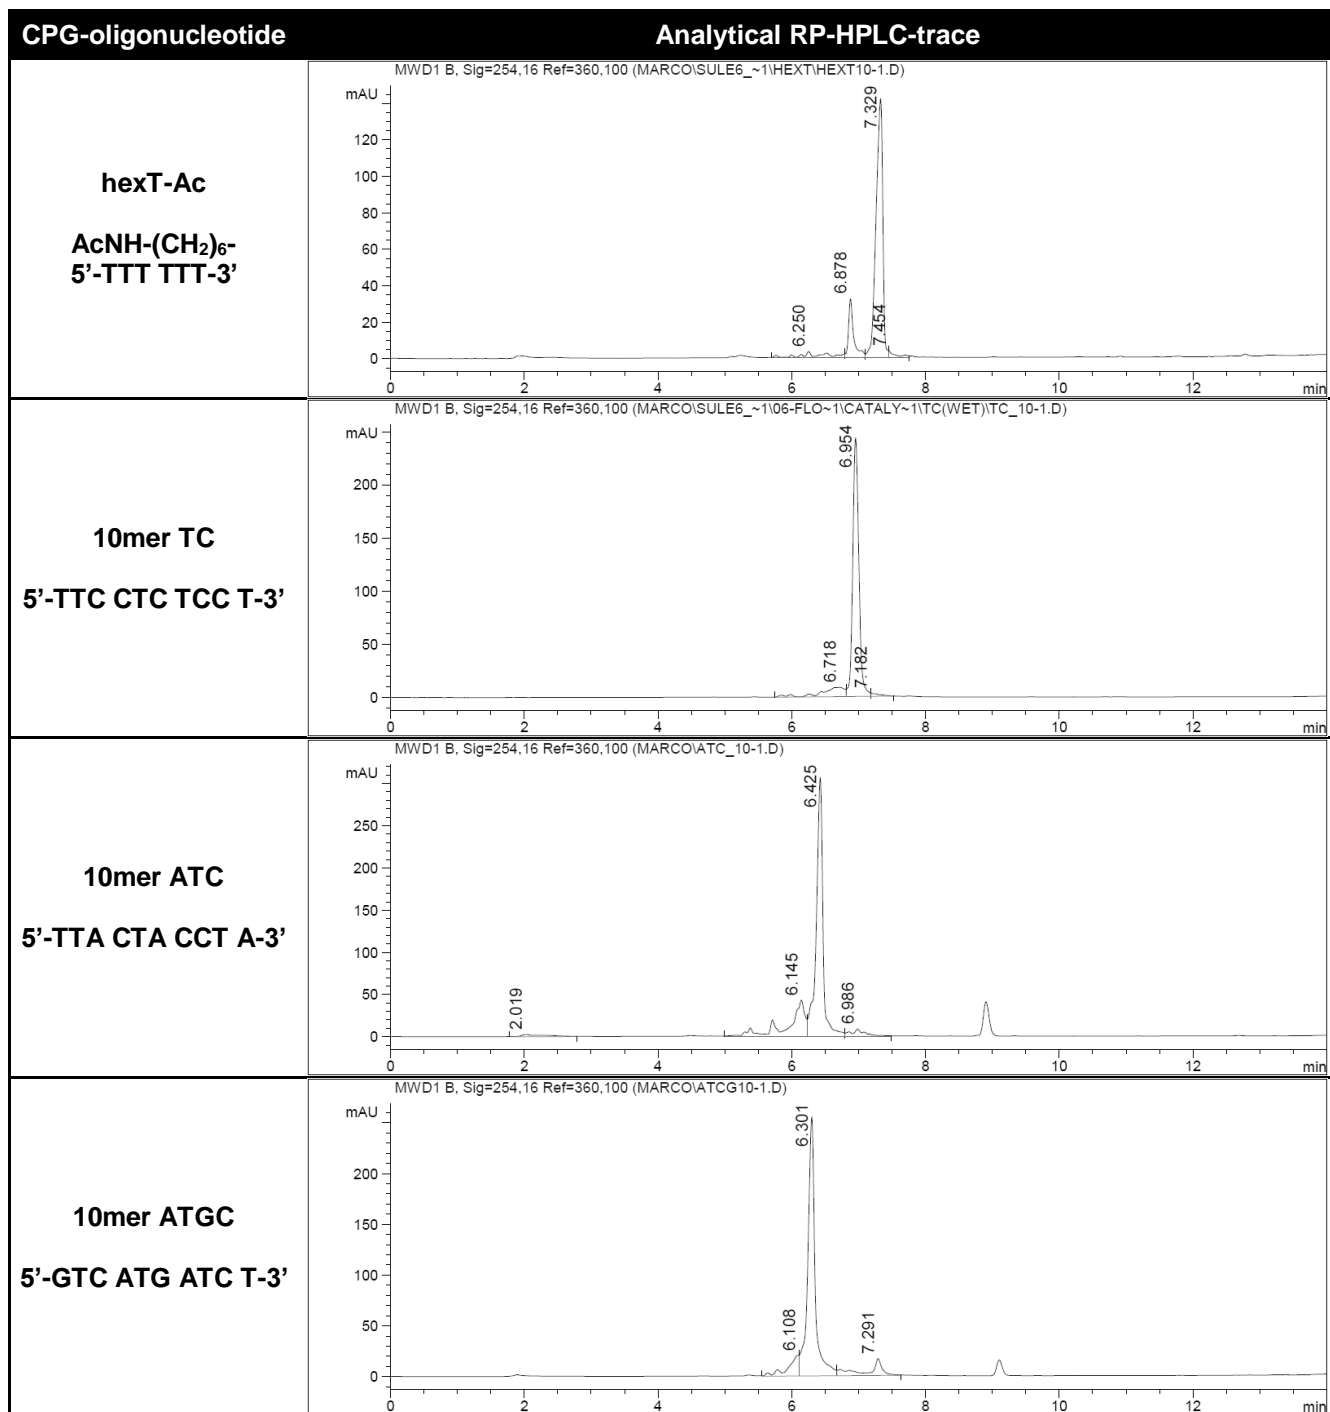

## CPG-oligonucleotide

## MALDI-MS spectra

hexT-Ac

 $\text{AcNH}-(\text{CH}_2)_6-$   
5'-TTT TTT-3'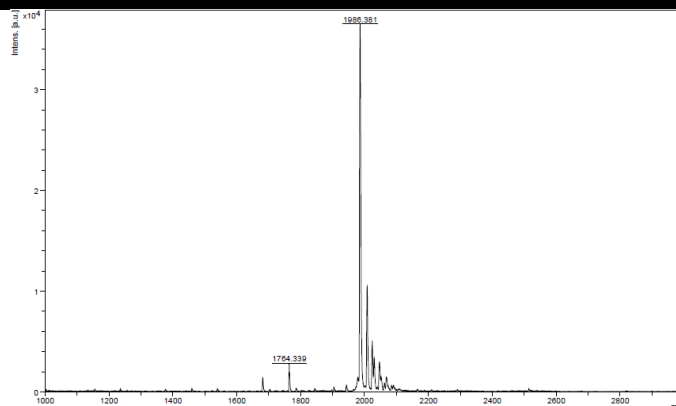mass calc. = 1985.4  
mass found = 1986.4

10mer TC

5'-TTC CTC TCC T-3'

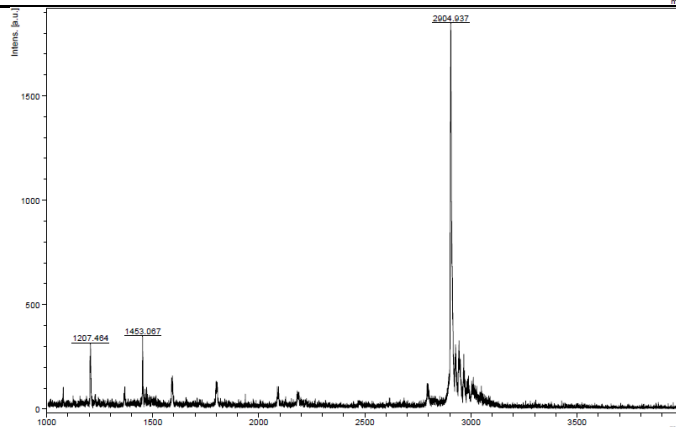mass calc. = 2904.9  
mass found = 2904.9

10mer ATC

5'-TTA CTA CCT A-3'

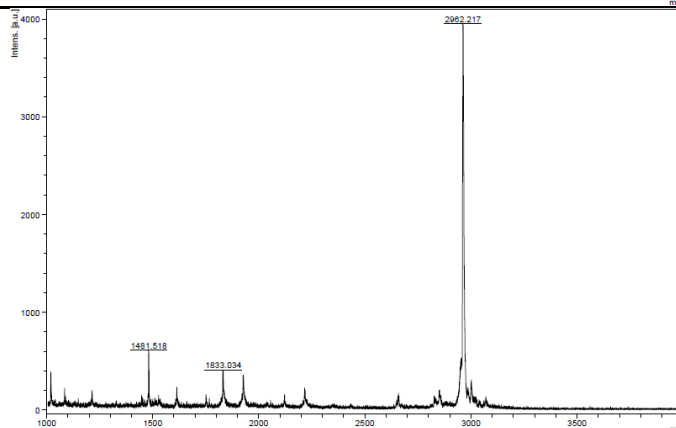mass calc. = 2962.0  
mass found = 2962.2

10mer ATGC

5'-GTC ATG ATC T-3'

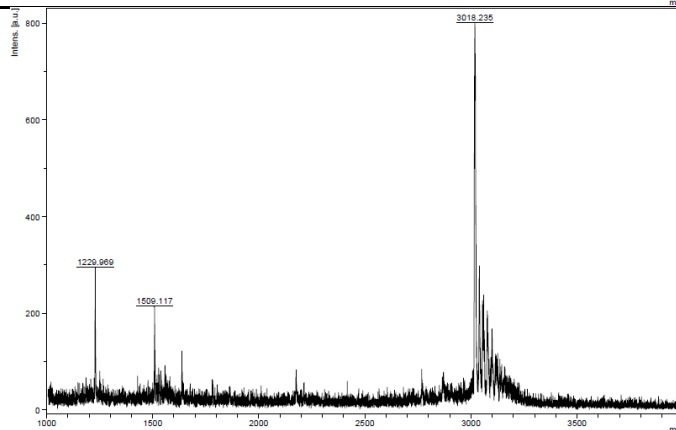mass calc. = 3019.0  
mass found = 3018.2



## CPG-oligonucleotide + AgOTf

According to the representative procedure (RP-03) solid support coupled oligonucleotide (20 nmol) was treated with AgOTf (200 equiv., 4  $\mu$ mol) in dry ACN.

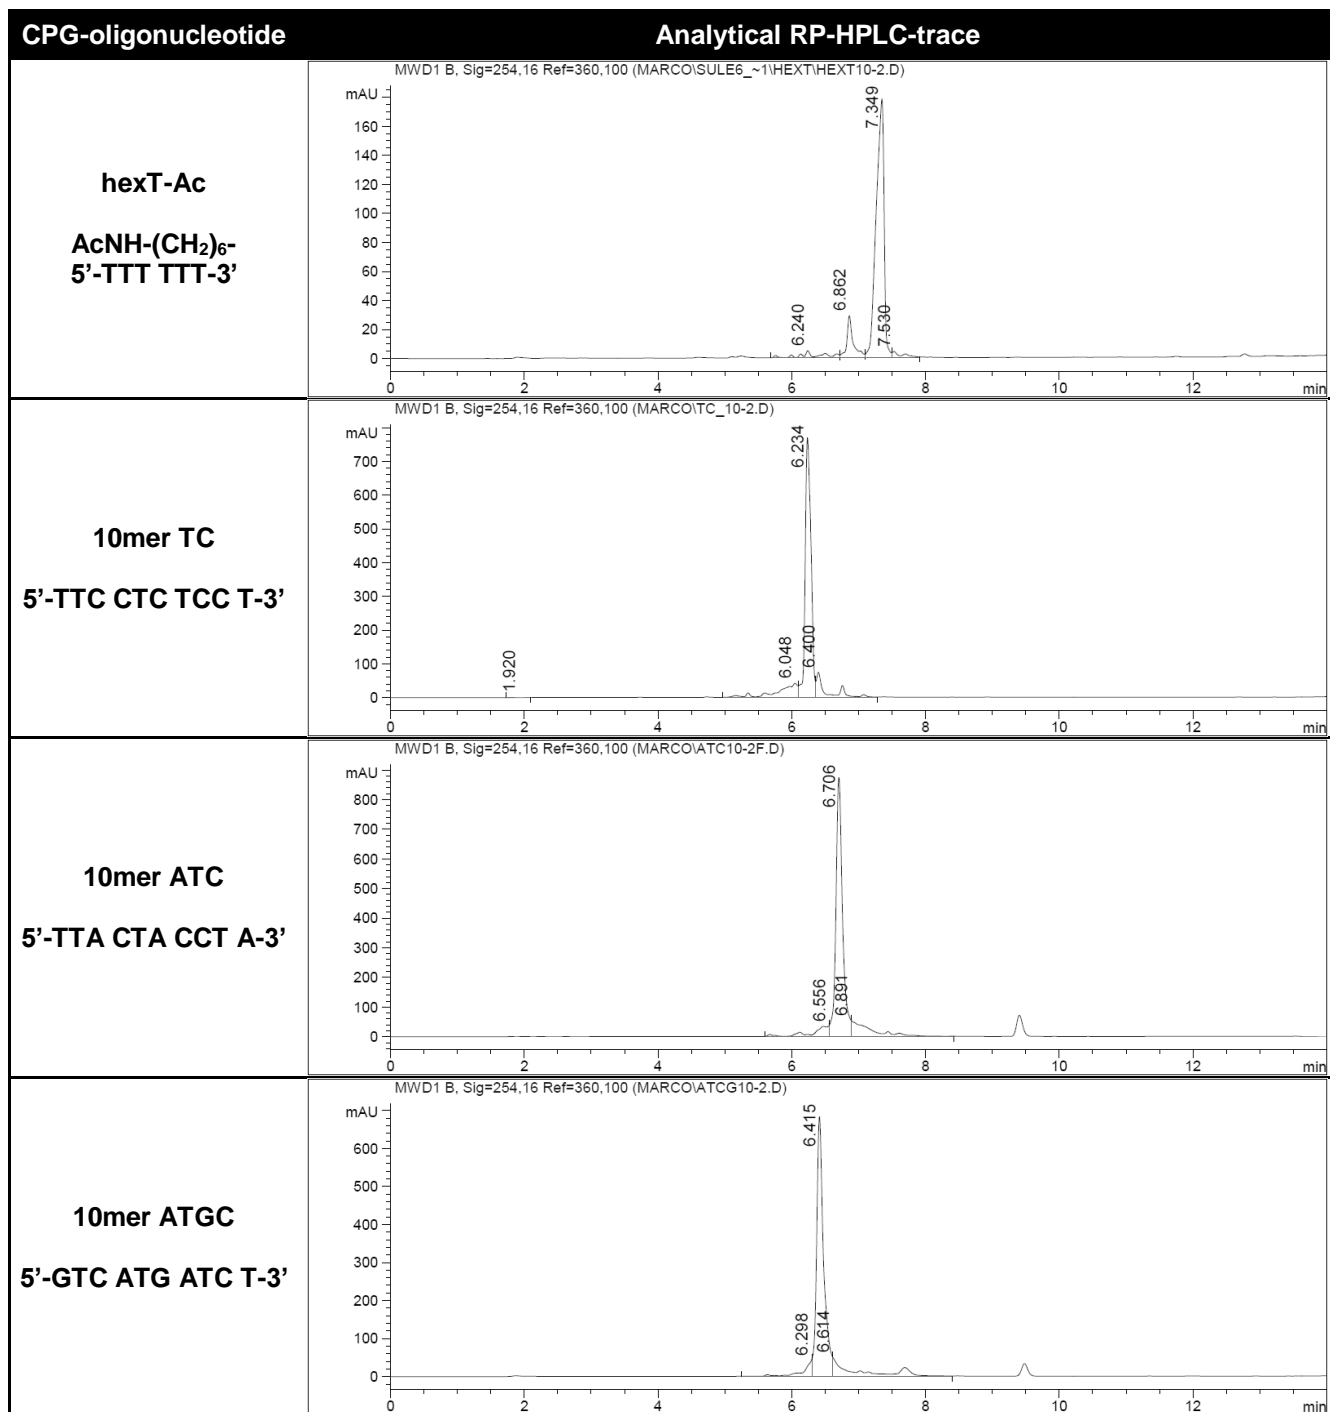

## CPG-oligonucleotide

## MALDI-MS spectra

hexT-Ac

 $\text{AcNH}-(\text{CH}_2)_6-$   
5'-TTT TTT-3'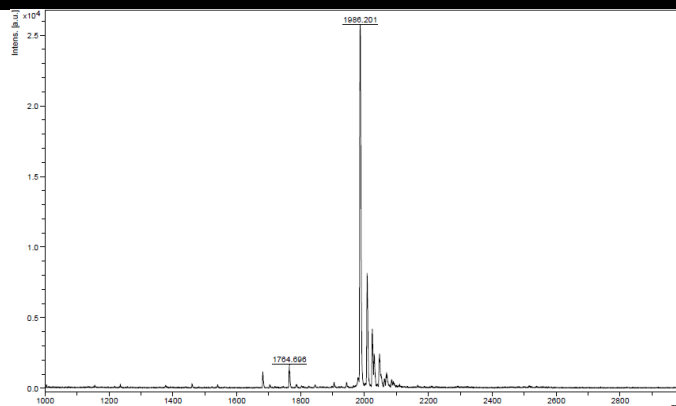mass calc. = 1985.4  
mass found = 1986.2

10mer TC

5'-TTC CTC TCC T-3'

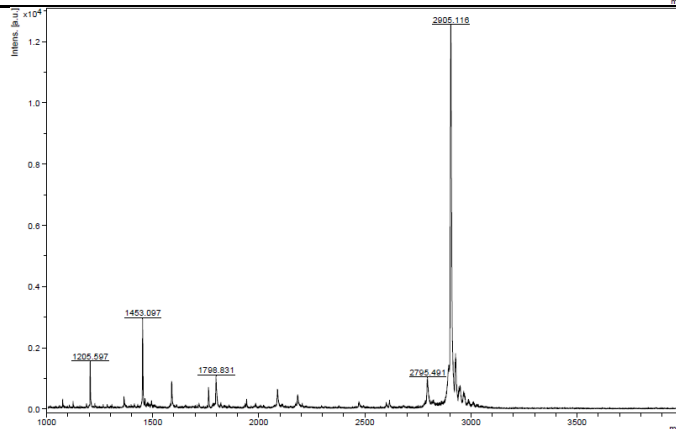mass calc. = 2904.9  
mass found = 2905.1

10mer ATC

5'-TTA CTA CCT A-3'

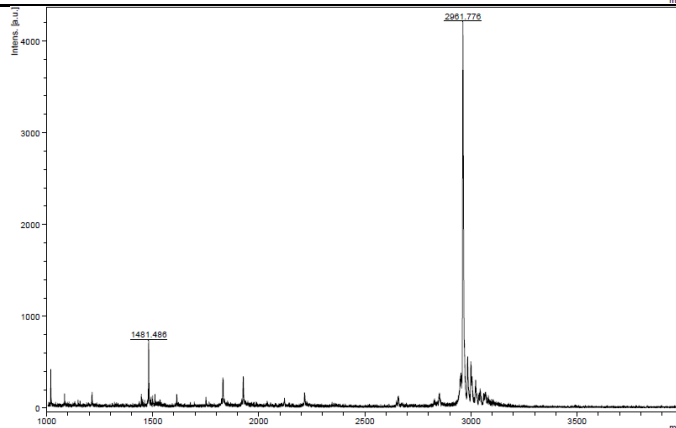mass calc. = 2962.0  
mass found = 2961.8

10mer ATGC

5'-GTC ATG ATC T-3'

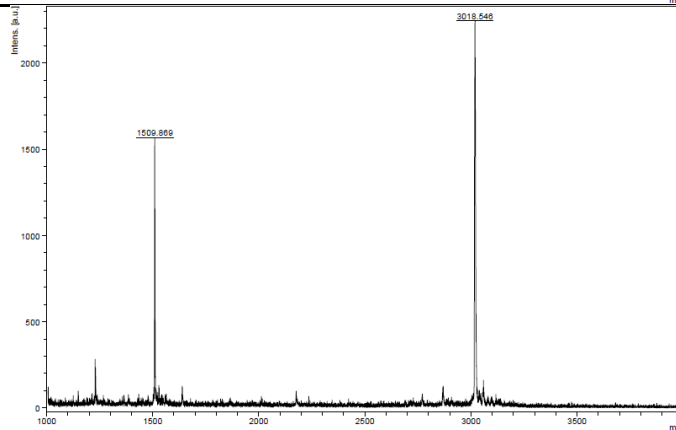mass calc. = 3019.0  
mass found = 3018.6

## CPG-oligonucleotide + AgSbF<sub>6</sub>

According to the representative procedure (RP-03) solid support coupled oligonucleotide (20 nmol) was treated with AgSbF<sub>6</sub> (200 equiv., 4  $\mu$ mol) in dry ACN.

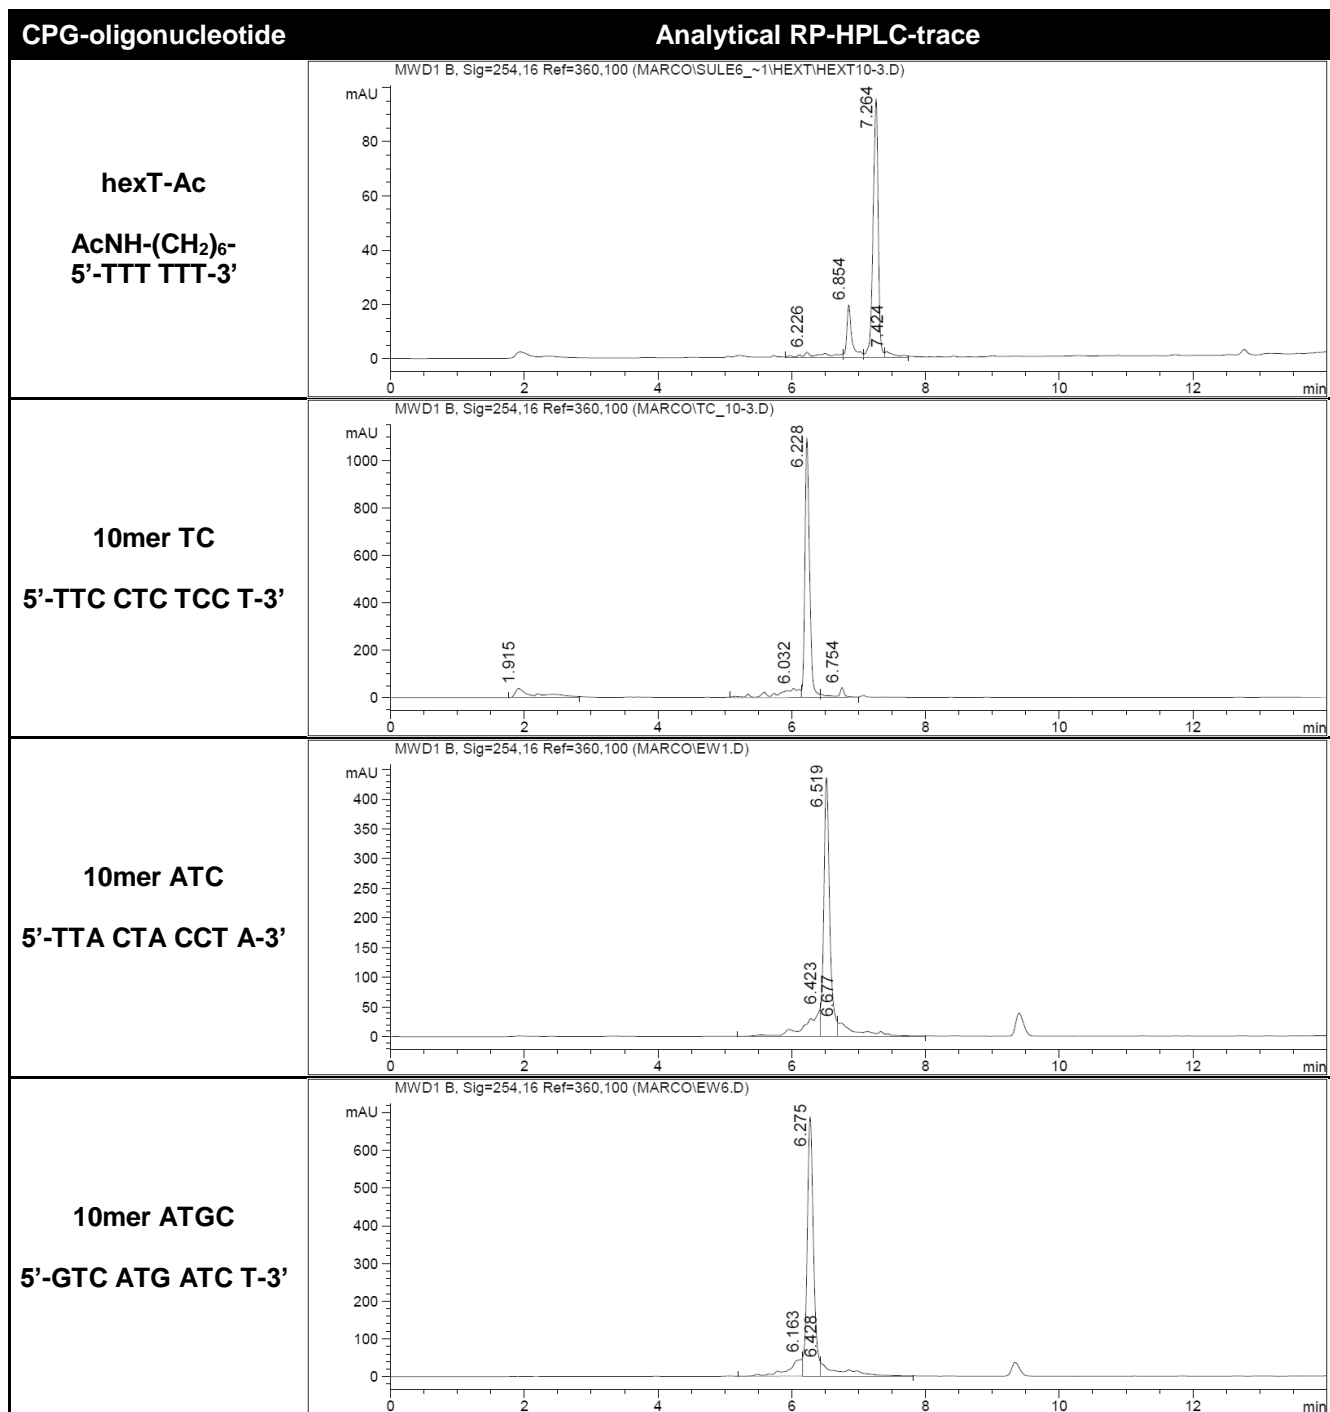

## CPG-oligonucleotide

## MALDI-MS spectra

hexT-Ac

AcNH-(CH<sub>2</sub>)<sub>6</sub>-  
5'-TTT TTT-3'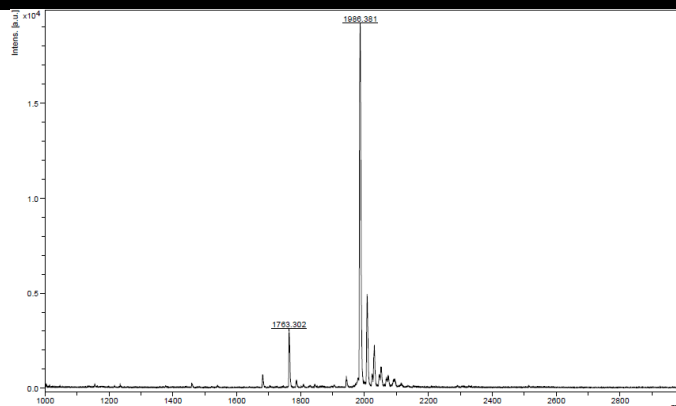mass calc. = 1985.4  
mass found = 1986.4

10mer TC

5'-TTC CTC TCC T-3'

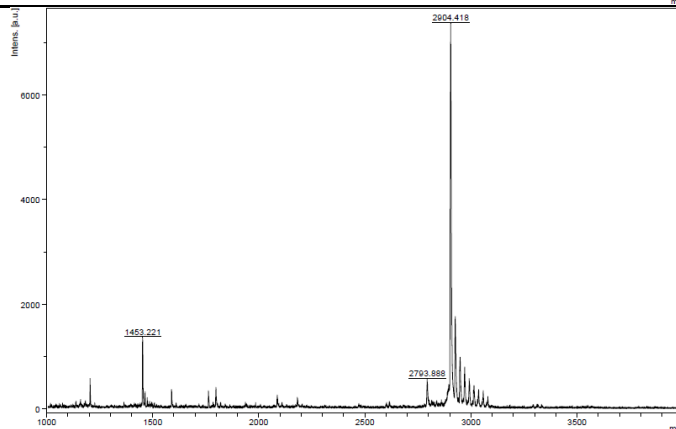mass calc. = 2904.9  
mass found = 2904.4

10mer ATC

5'-TTA CTA CCT A-3'

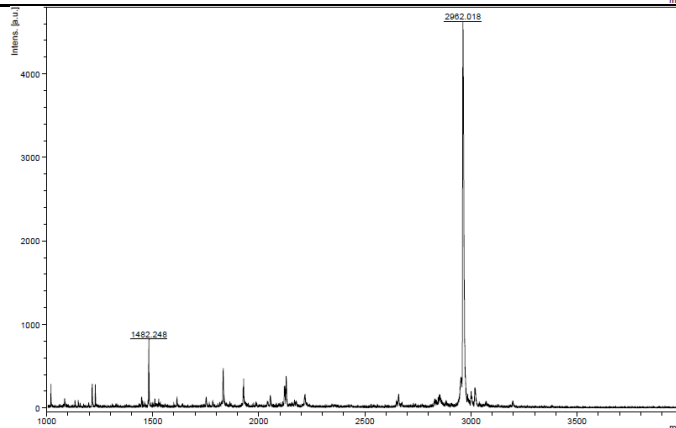mass calc. = 2962.0  
mass found = 2962.0

10mer ATGC

5'-GTC ATG ATC T-3'

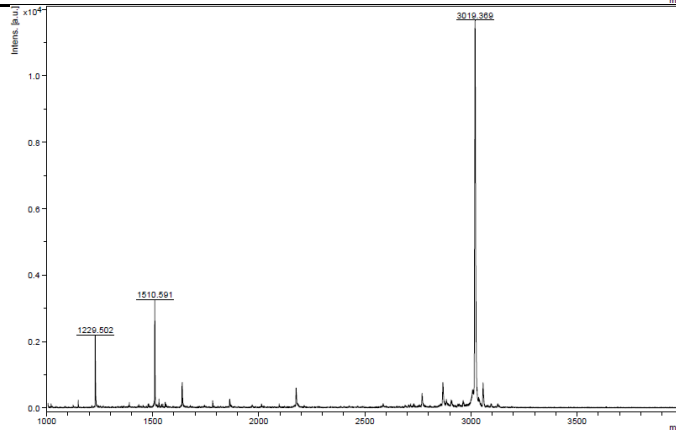mass calc. = 3019.0  
mass found = 3019.4

## CPG-oligonucleotide + BiBr<sub>3</sub>

According to the representative procedure (RP-03) solid support coupled oligonucleotide (20 nmol) was treated with BiBr<sub>3</sub> (200 equiv., 4 µmol) in dry ACN.

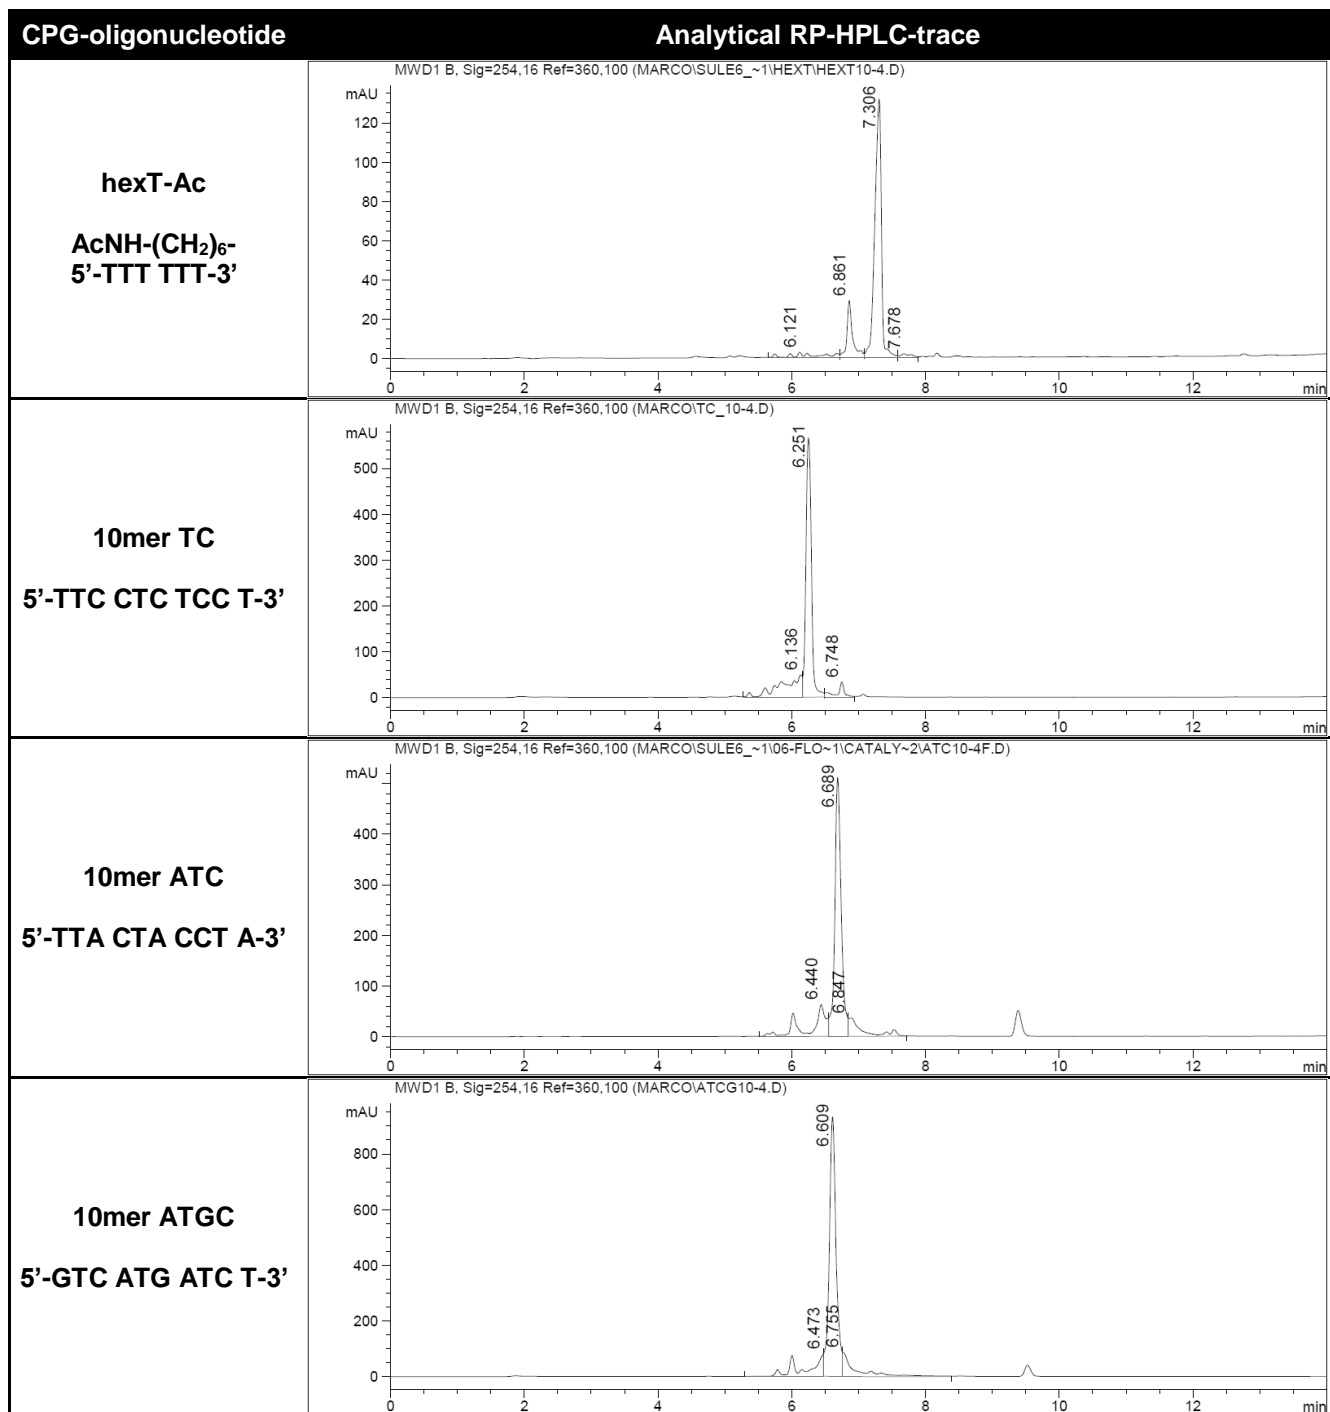

## CPG-oligonucleotide

## MALDI-MS spectra

hexT-Ac

 $\text{AcNH}-(\text{CH}_2)_6-$   
5'-TTT TTT-3'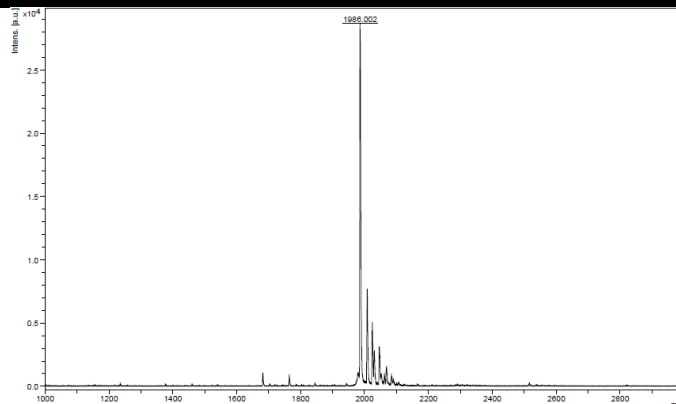mass calc. = 1985.4  
mass found = 1986.0

10mer TC

5'-TTC CTC TCC T-3'

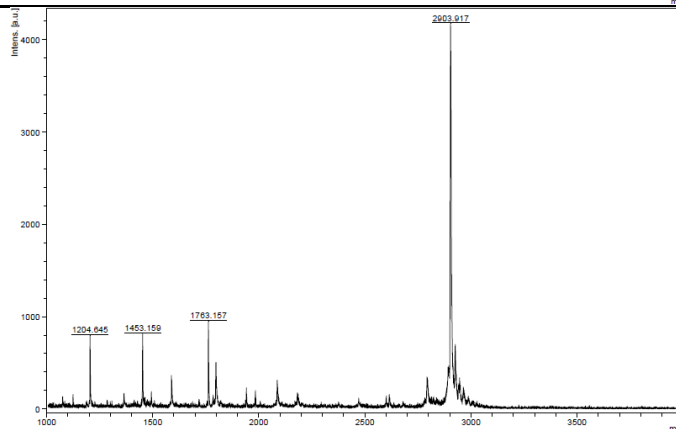mass calc. = 2904.9  
mass found = 2903.9

10mer ATC

5'-TTA CTA CCT A-3'

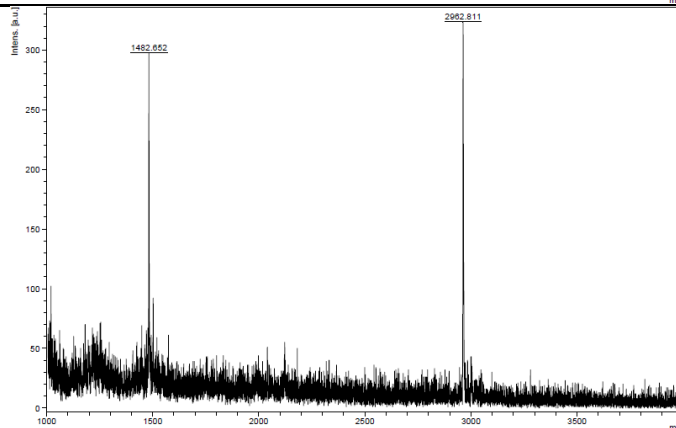mass calc. = 2962.0  
mass found = 2962.8

10mer ATGC

5'-GTC ATG ATC T-3'

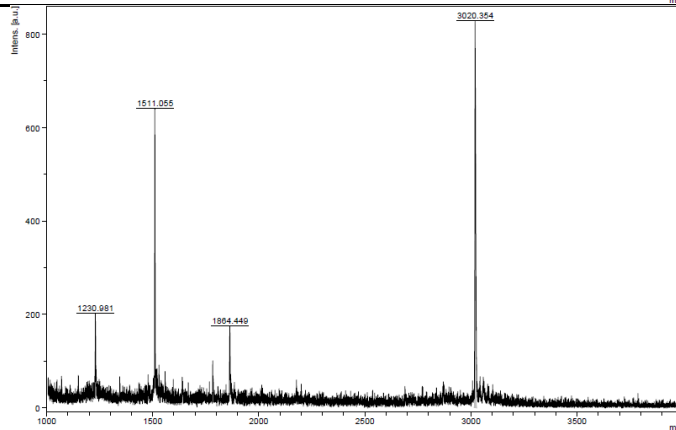mass calc. = 3019.0  
mass found = 3020.4

## CPG-oligonucleotide + Bi(OTf)<sub>3</sub>

According to the representative procedure (RP-03) solid support coupled oligonucleotide (20 nmol) was treated with Bi(OTf)<sub>3</sub> (200 equiv., 4 µmol) in dry MeOH.

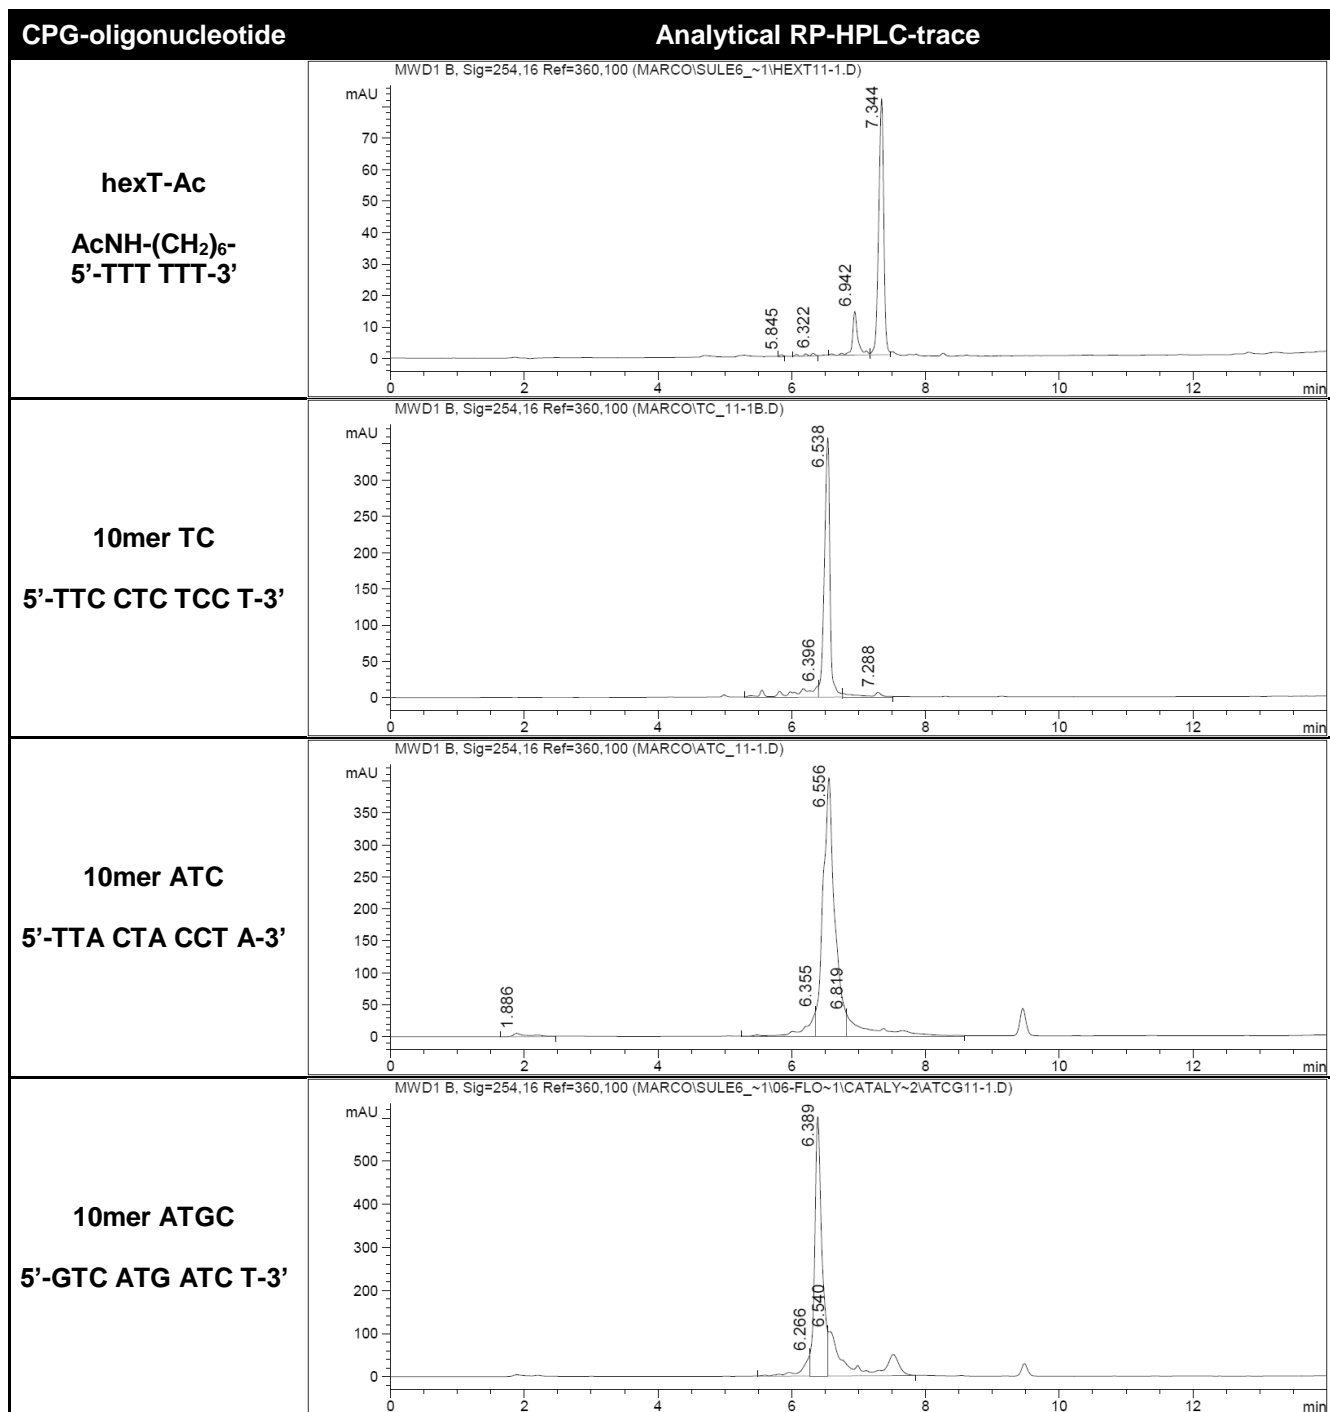

## CPG-oligonucleotide

## MALDI-MS spectra

**hexT-Ac****AcNH-(CH<sub>2</sub>)<sub>6</sub>-  
5'-TTT TTT-3'**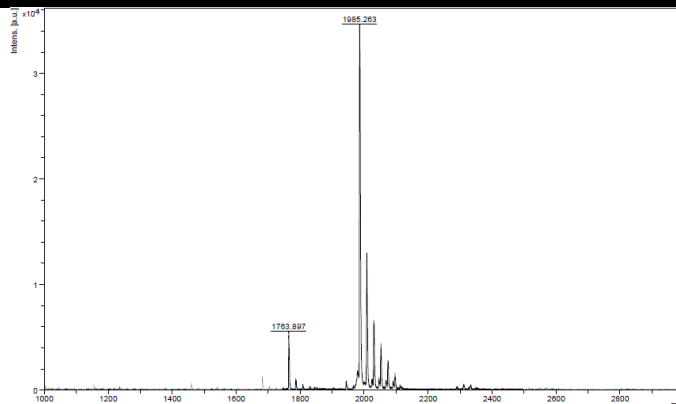mass calc. = 1985.4  
mass found = 1985.3**10mer TC****5'-TTC CTC TCC T-3'**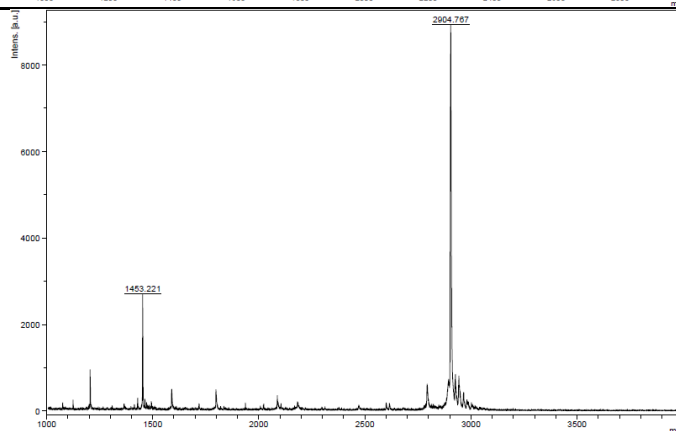mass calc. = 2904.9  
mass found = 2904.8**10mer ATC****5'-TTA CTA CCT A-3'**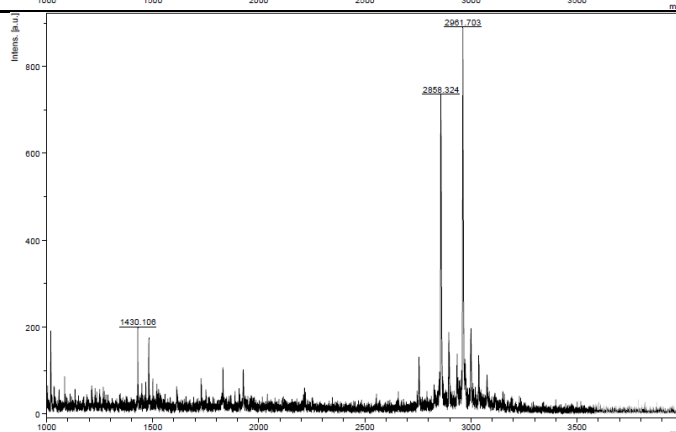mass calc. = 2962.0  
mass found = 2961.7**10mer ATGC****5'-GTC ATG ATC T-3'**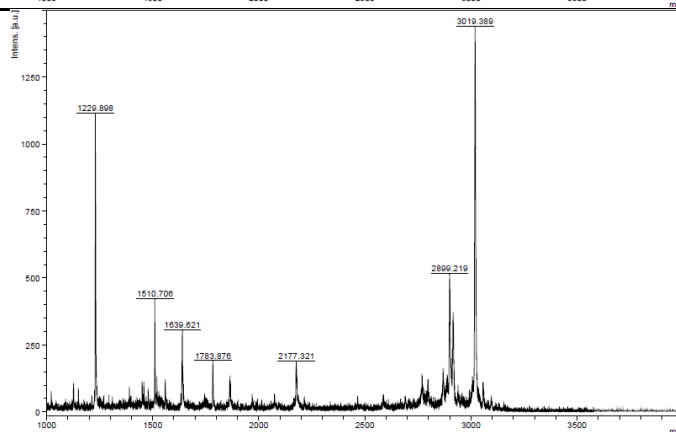mass calc. = 3019.0  
mass found = 3019.4



## CPG-oligonucleotide + $\text{Ce}(\text{NH}_4)_2(\text{NO}_3)_6$

According to the representative procedure (RP-03) solid support coupled oligonucleotide (20 nmol) was treated with  $\text{Ce}(\text{NH}_4)_2(\text{NO}_3)_6$  (200 equiv., 4  $\mu\text{mol}$ ) in dry MeOH.

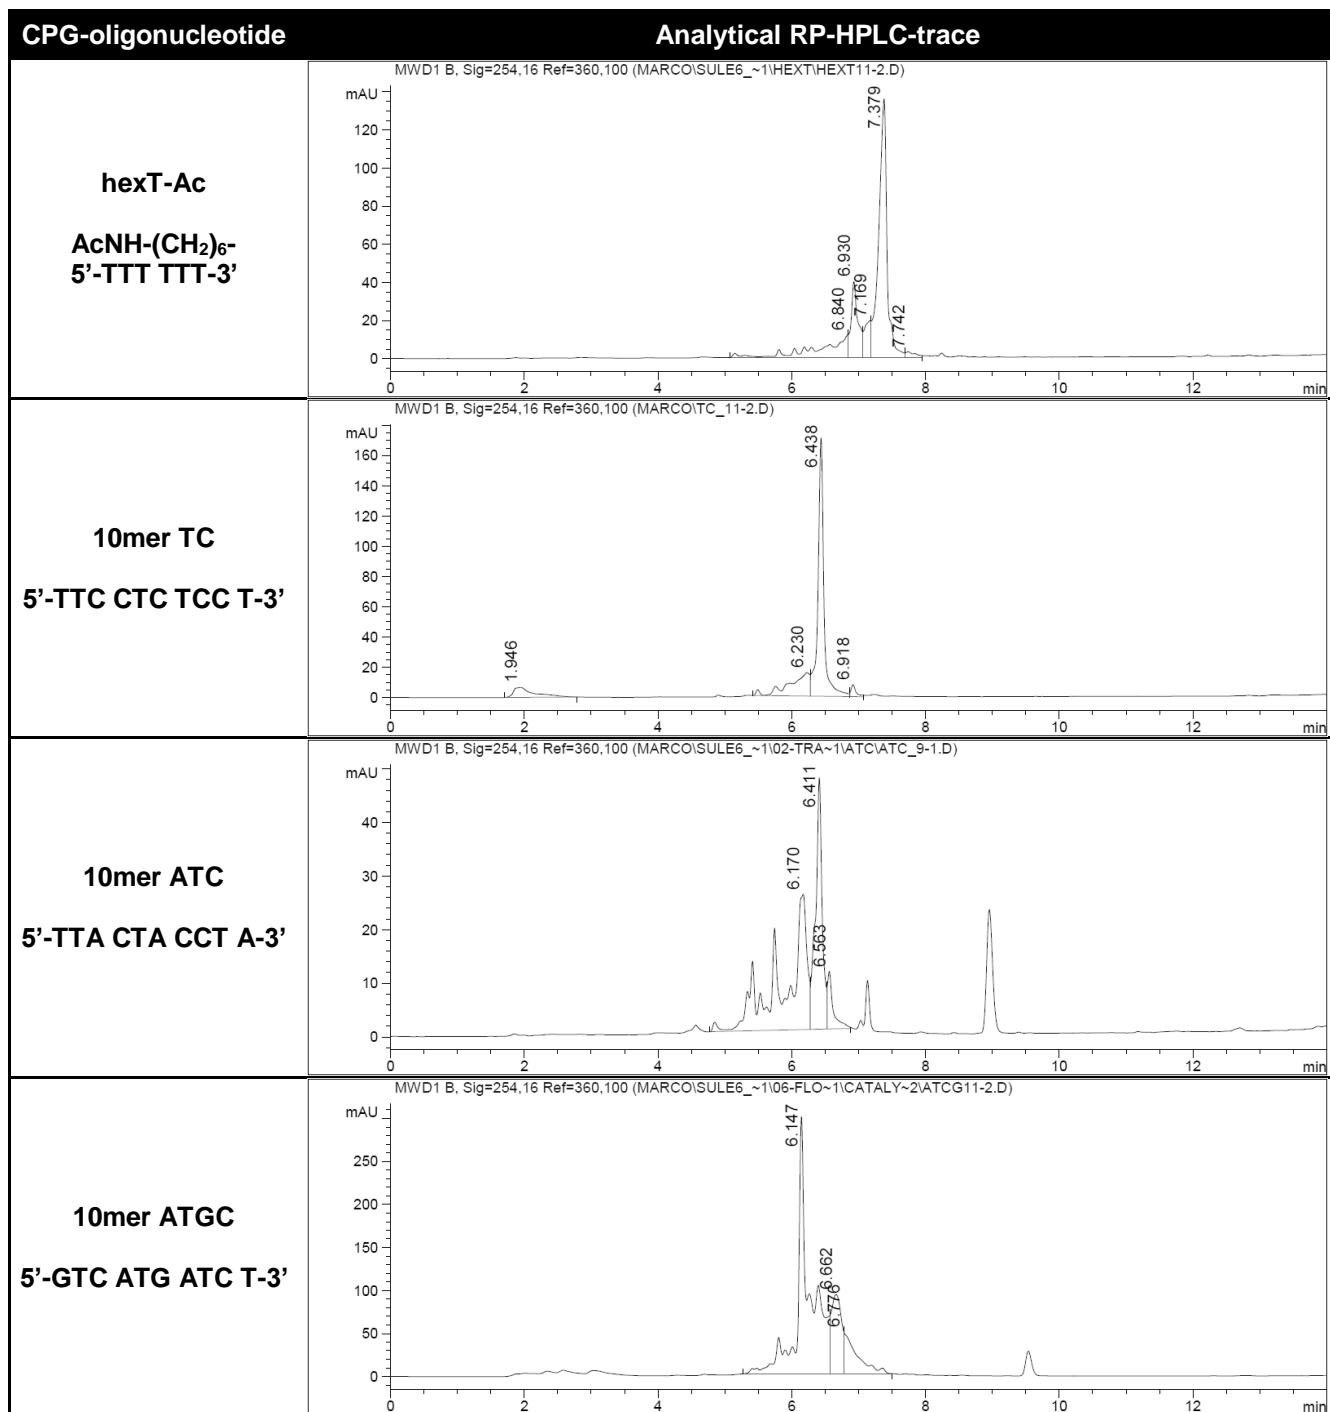

## CPG-oligonucleotide

## MALDI-MS spectra

hexT-Ac

 $\text{AcNH}-(\text{CH}_2)_6-$   
5'-TTT TTT-3'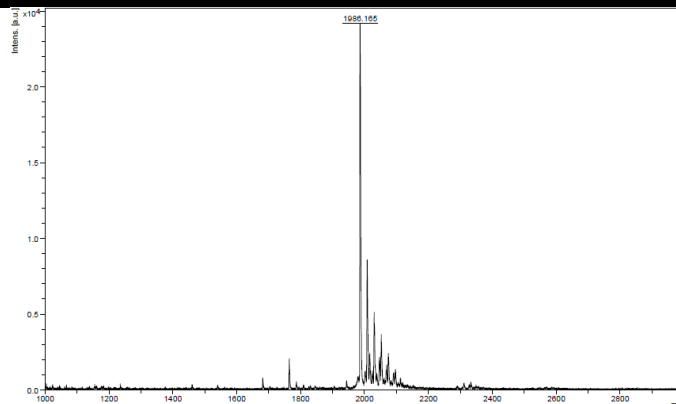mass calc. = 1985.4  
mass found = 1986.2

10mer TC

5'-TTC CTC TCC T-3'

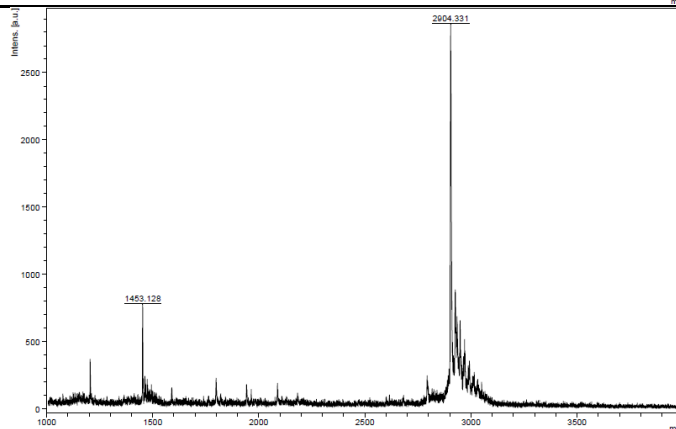mass calc. = 2904.9  
mass found = 2904.3

10mer ATC

5'-TTA CTA CCT A-3'

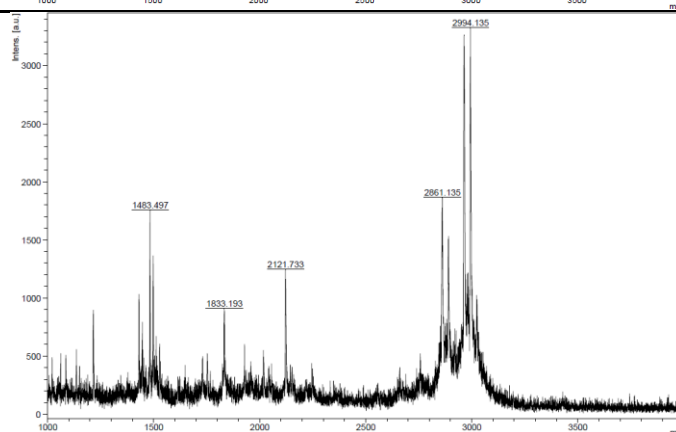mass calc. = 2962.0  
mass found = 2963.2

10mer ATGC

5'-GTC ATG ATC T-3'

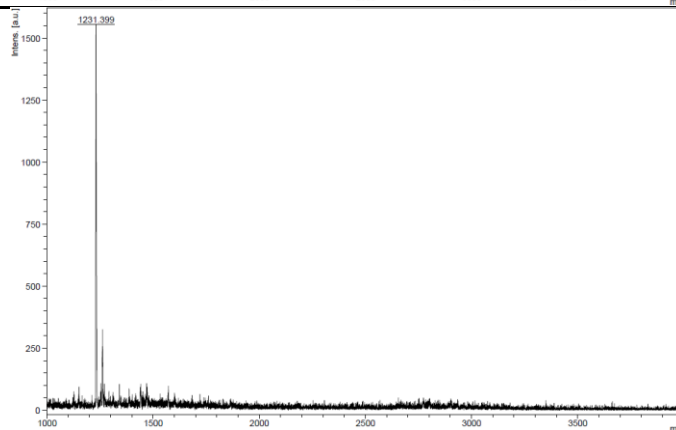mass calc. = 3019.0  
mass found = n.d.

## CPG-oligonucleotide + Co(acac)<sub>3</sub>

According to the representative procedure (RP-03) solid support coupled oligonucleotide (20 nmol) was treated with Co(acac)<sub>3</sub> (200 equiv., 4 μmol) in dry ACN.

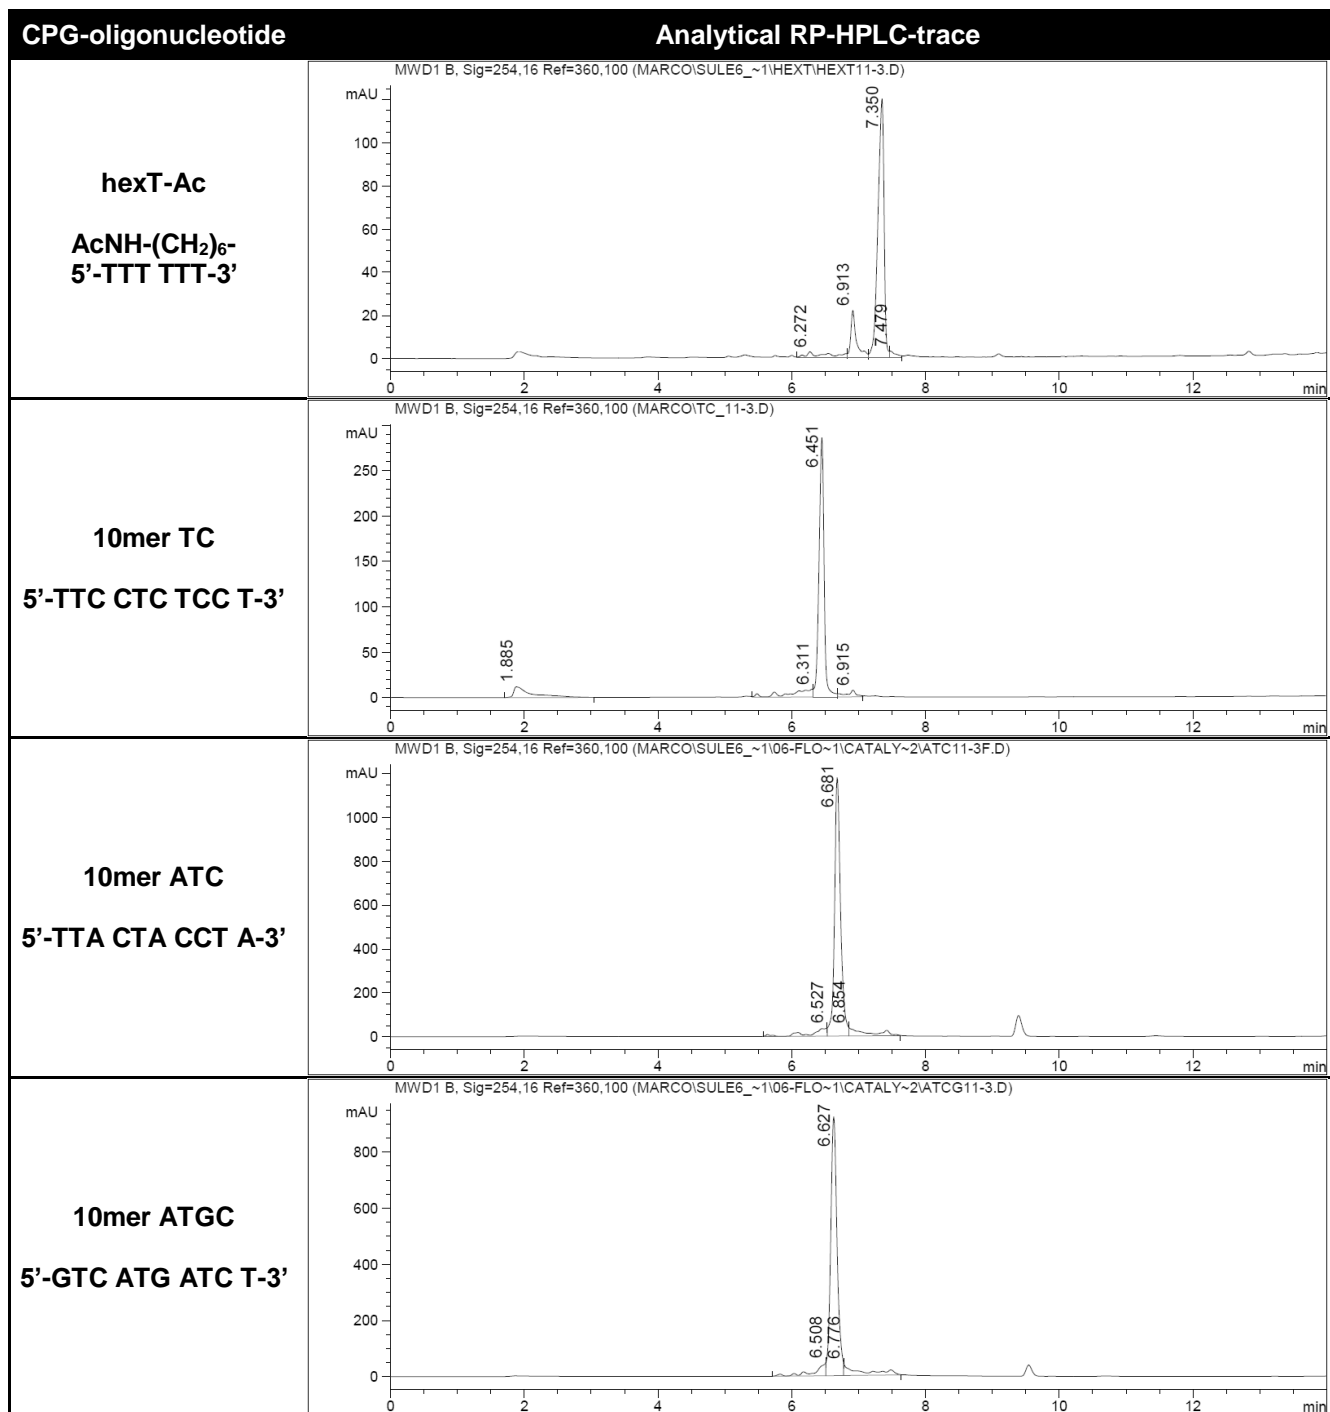

## CPG-oligonucleotide

## MALDI-MS spectra

hexT-Ac

 $\text{AcNH}-(\text{CH}_2)_6-$   
5'-TTT TTT-3'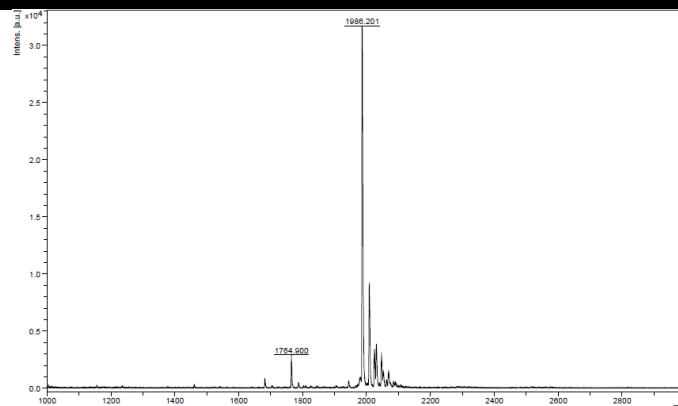mass calc. = 1985.4  
mass found = 1986.2

10mer TC

5'-TTC CTC TCC T-3'

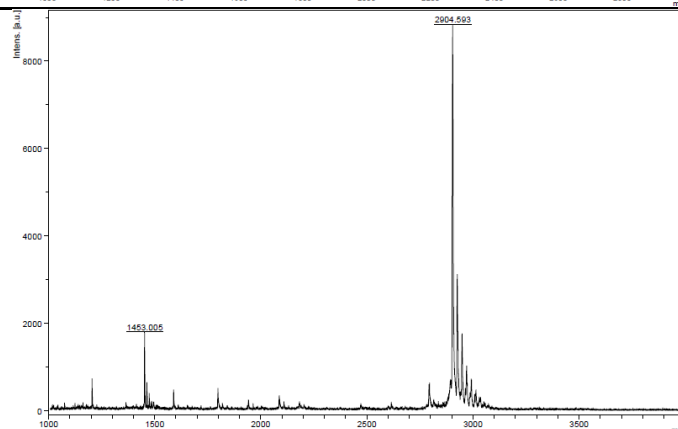mass calc. = 2904.9  
mass found = 2904.6

10mer ATC

5'-TTA CTA CCT A-3'

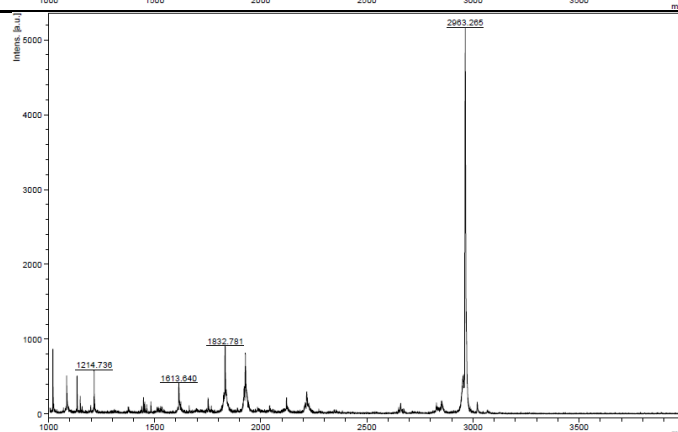mass calc. = 2962.0  
mass found = 2963.3

10mer ATGC

5'-GTC ATG ATC T-3'

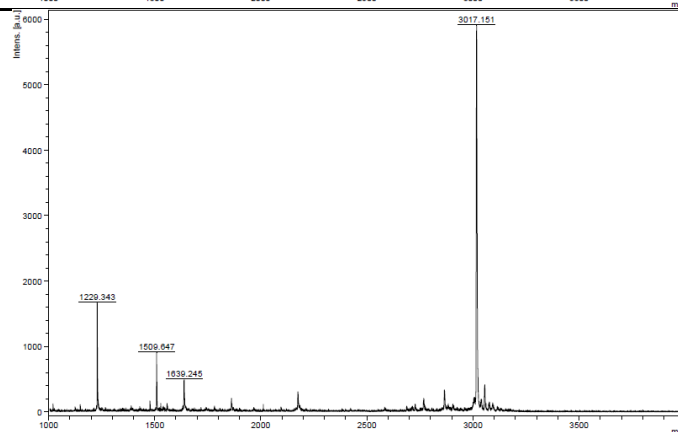mass calc. = 3019.0  
mass found = 3017.2

## CPG-oligonucleotide + CuCl

According to the representative procedure (RP-03) solid support coupled oligonucleotide (20 nmol) was treated with CuCl (200 equiv., 4  $\mu$ mol) in dry MeOH.

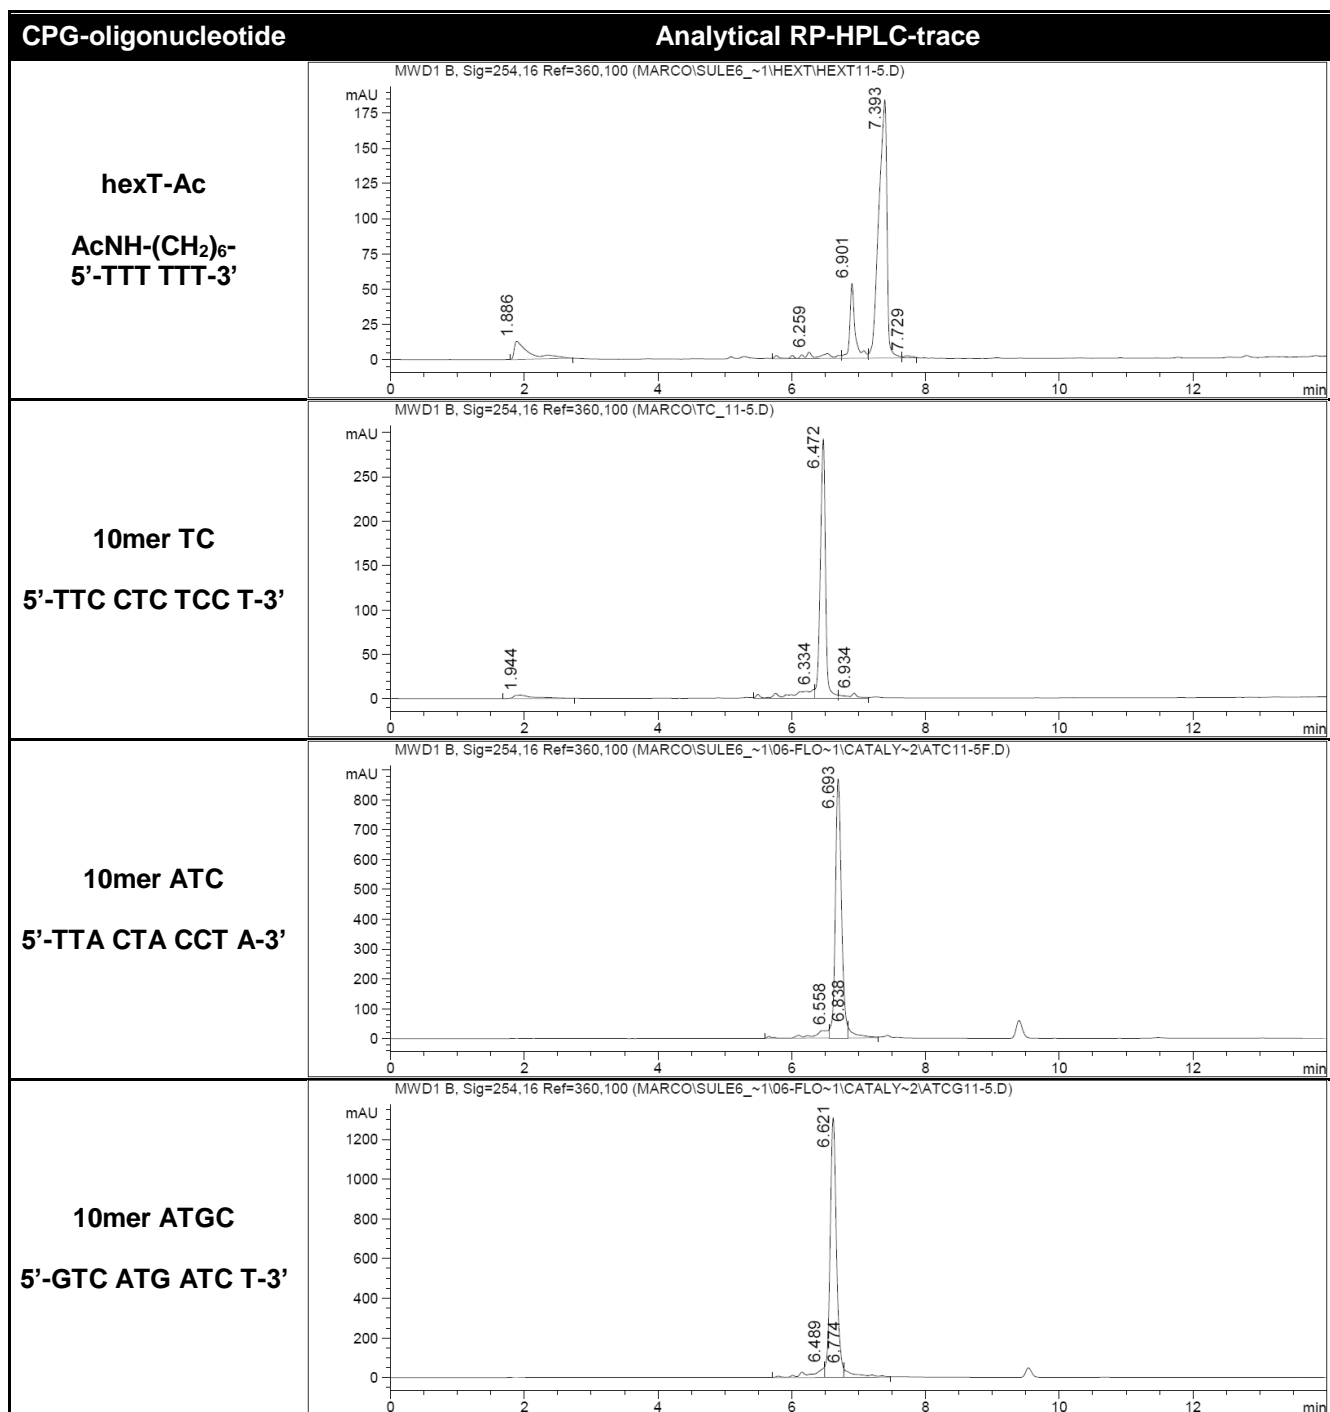

## CPG-oligonucleotide

## MALDI-MS spectra

hexT-Ac

 $\text{AcNH}-(\text{CH}_2)_6-$   
5'-TTT TTT-3'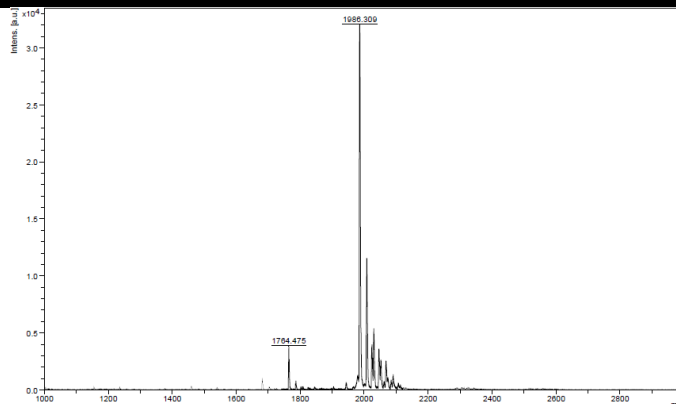mass calc. = 1985.4  
mass found = 1986.3

10mer TC

5'-TTC CTC TCC T-3'

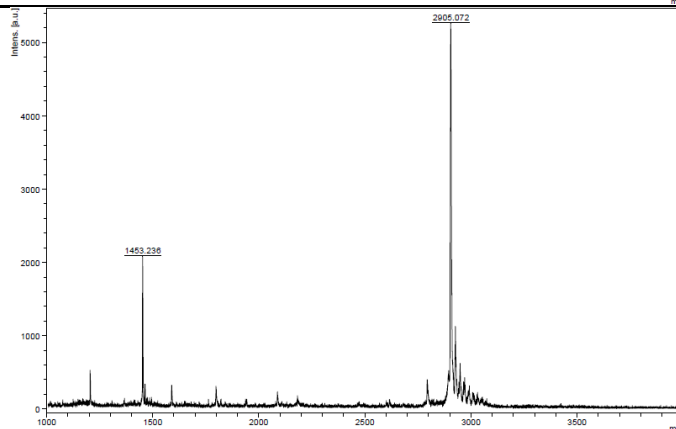mass calc. = 2904.9  
mass found = 2905.1

10mer ATC

5'-TTA CTA CCT A-3'

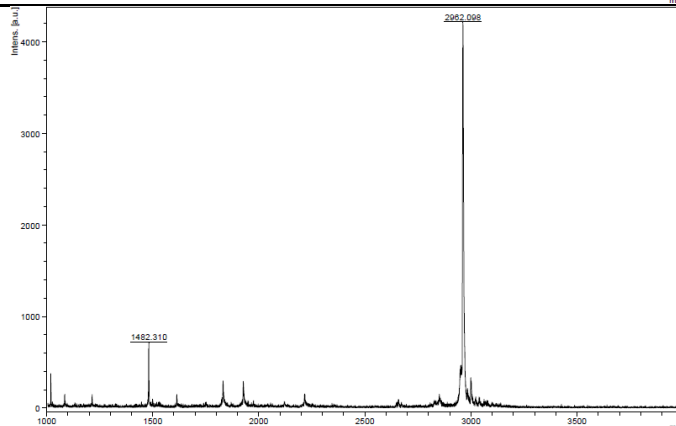mass calc. = 2962.0  
mass found = 2962.1

10mer ATGC

5'-GTC ATG ATC T-3'

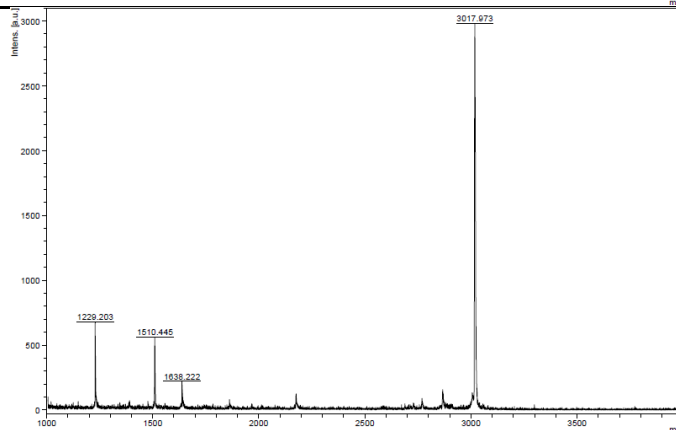mass calc. = 3019.0  
mass found = 3018.0

**CPG-oligonucleotide + Cu(MeCN)<sub>4</sub>PF<sub>6</sub>**

According to the representative procedure (RP-03) solid support coupled oligonucleotide (20 nmol) was treated with Cu(MeCN)<sub>4</sub>PF<sub>6</sub> (200 equiv., 4 μmol) in dry ACN.

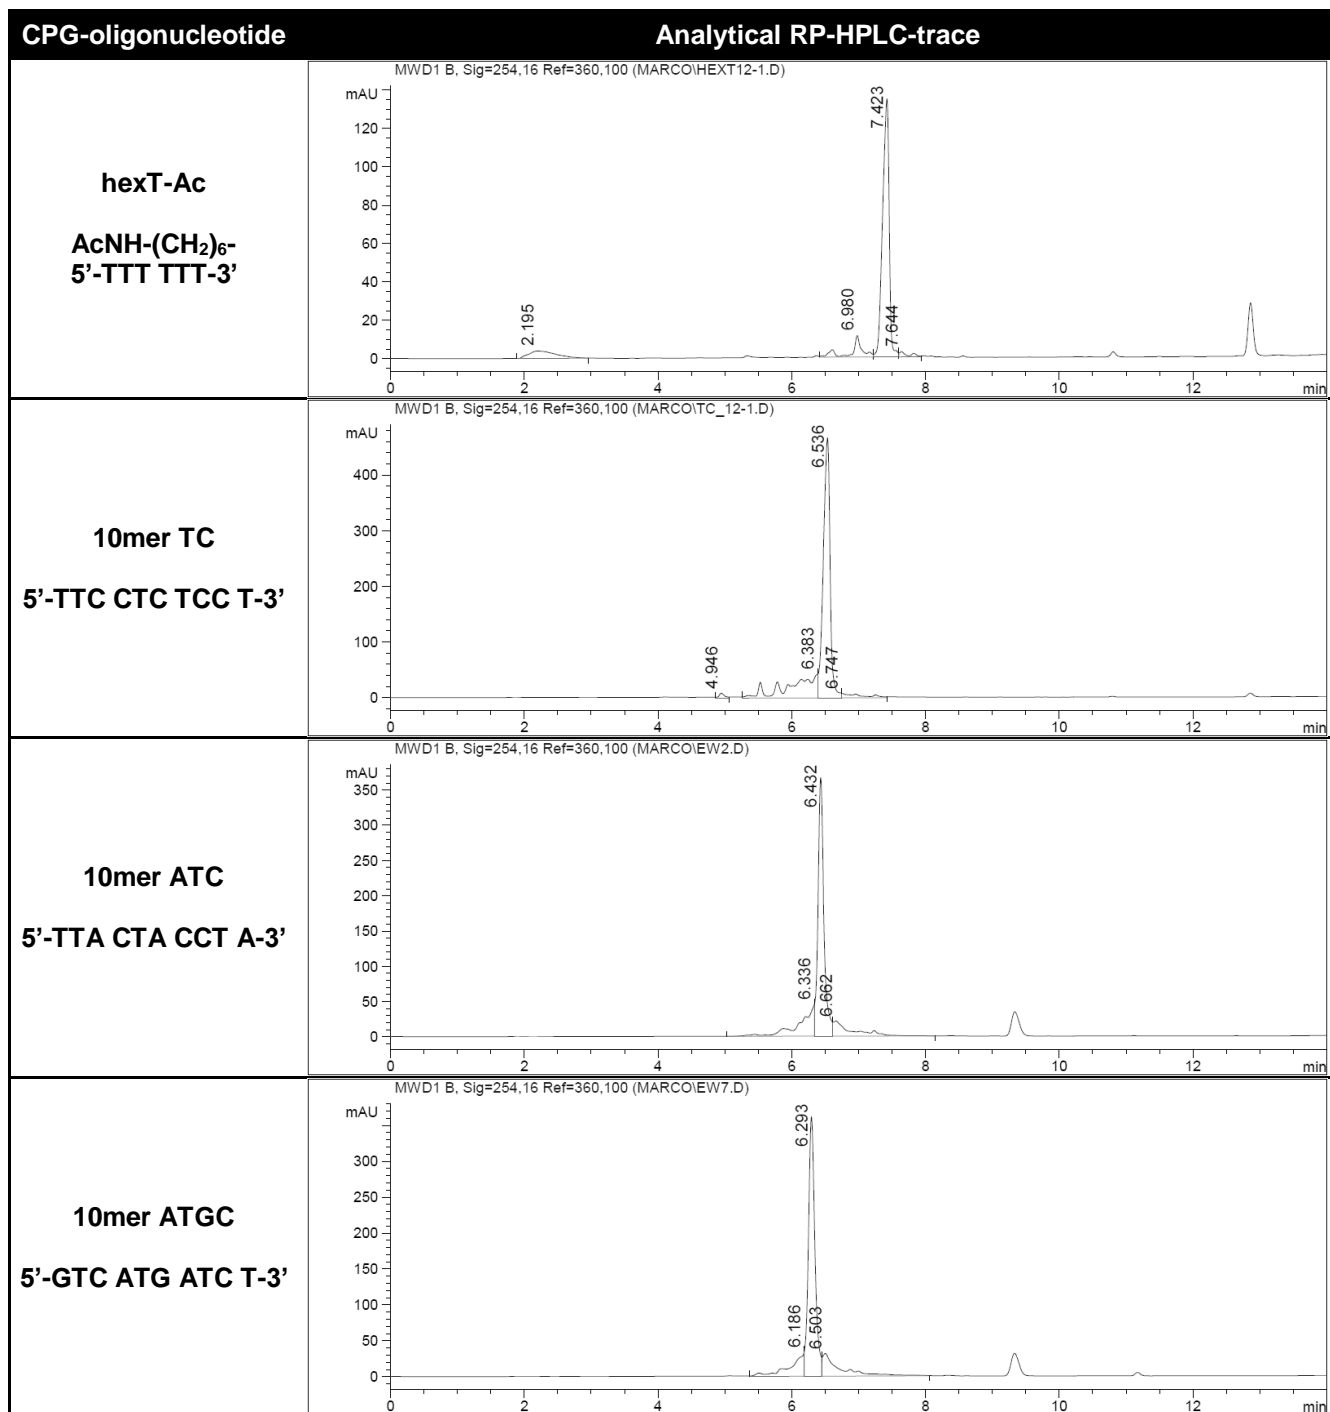

## CPG-oligonucleotide

## MALDI-MS spectra

hexT-Ac

AcNH-(CH<sub>2</sub>)<sub>6</sub>-  
5'-TTT TTT-3'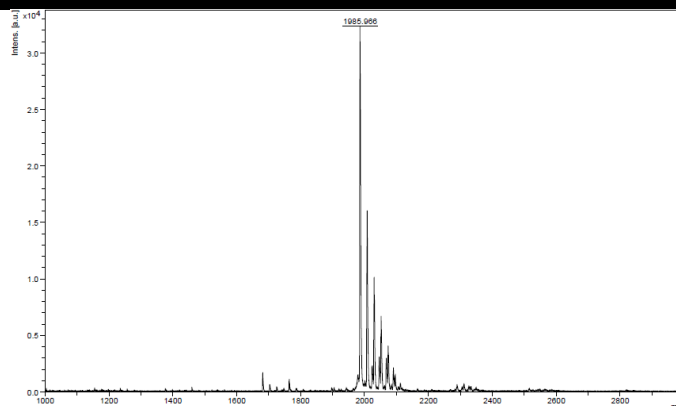mass calc. = 1985.4  
mass found = 1986.0

10mer TC

5'-TTC CTC TCC T-3'

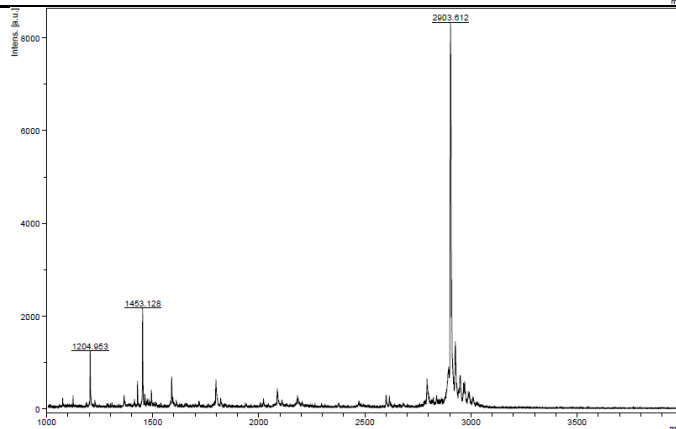mass calc. = 2904.9  
mass found = 2903.6

10mer ATC

5'-TTA CTA CCT A-3'

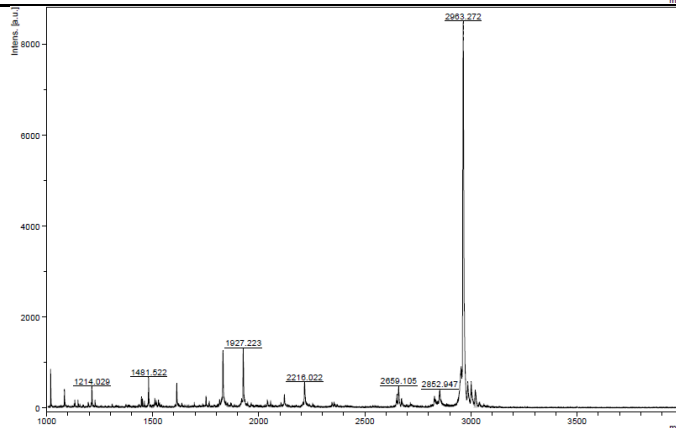mass calc. = 2962.0  
mass found = 2963.3

10mer ATGC

5'-GTC ATG ATC T-3'

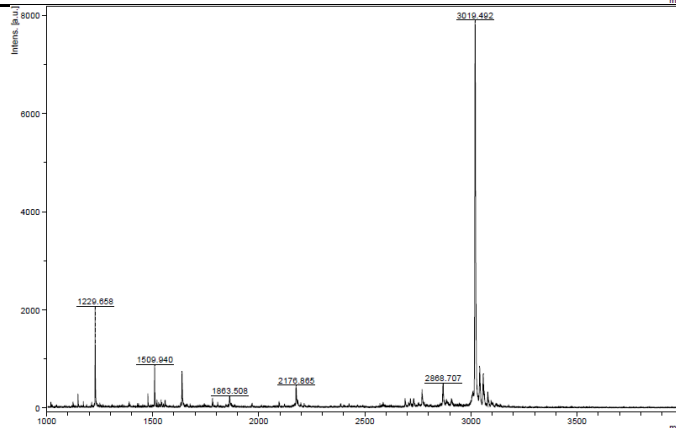mass calc. = 3019.0  
mass found = 3019.5



## CPG-oligonucleotide + Cu(OTf)<sub>2</sub>

According to the representative procedure (RP-03) solid support coupled oligonucleotide (20 nmol) was treated with Cu(OTf)<sub>2</sub> (200 equiv., 4 μmol) in dry ACN.

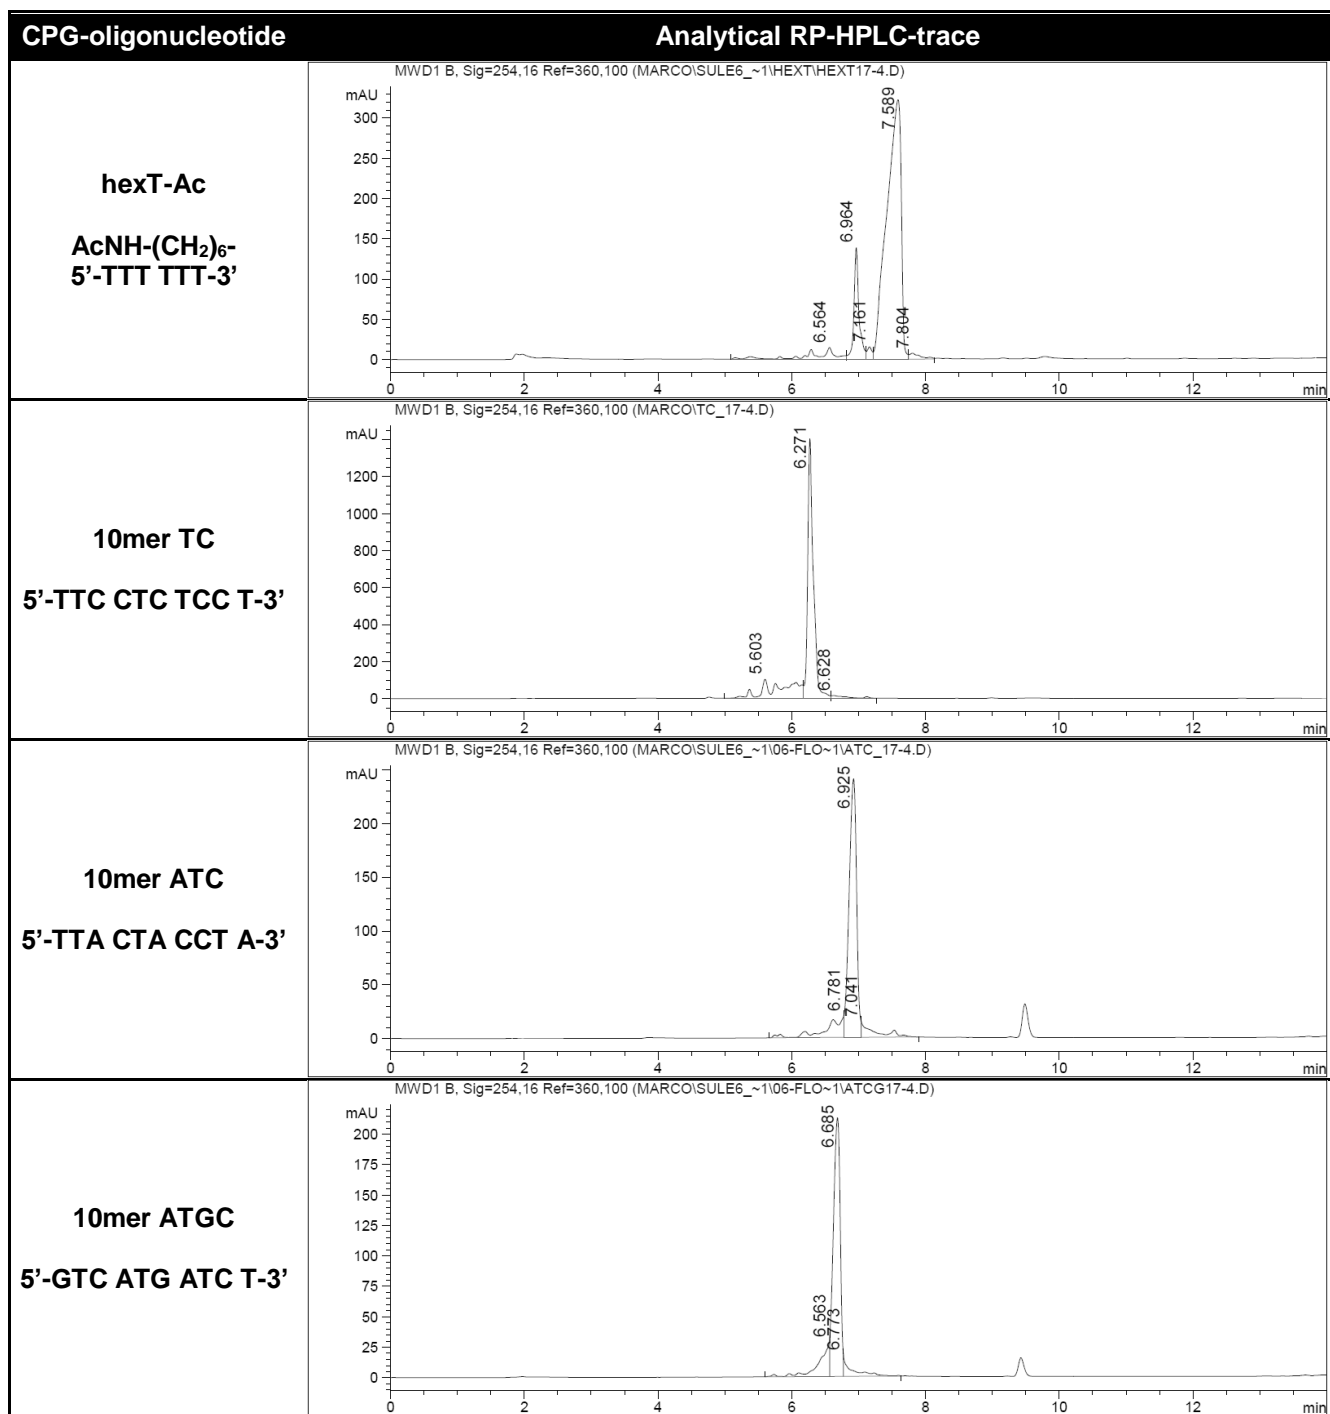

## CPG-oligonucleotide

## MALDI-MS spectra

**hexT-Ac****AcNH-(CH<sub>2</sub>)<sub>6</sub>-  
5'-TTT TTT-3'**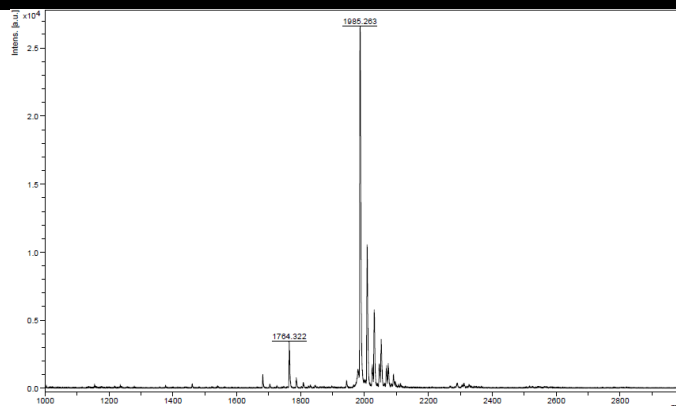mass calc. = 1985.4  
mass found = 1985.3**10mer TC****5'-TTC CTC TCC T-3'**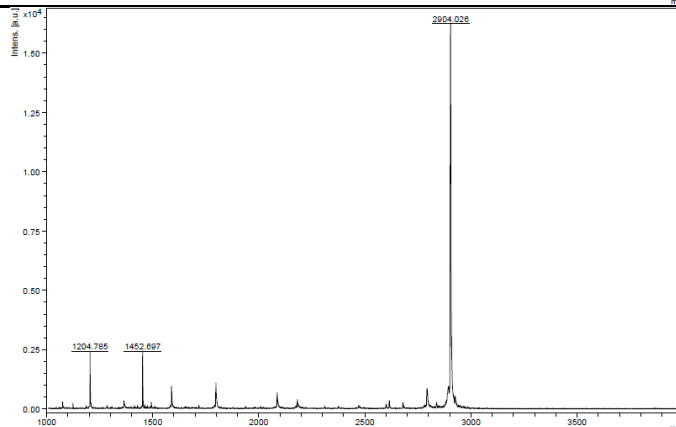mass calc. = 2904.9  
mass found = 2904.0**10mer ATC****5'-TTA CTA CCT A-3'**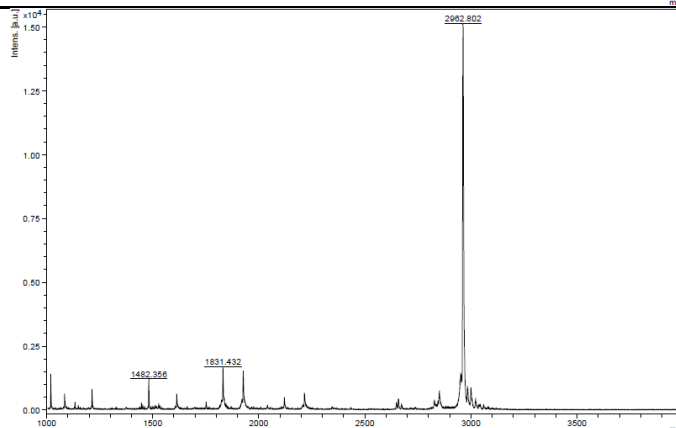mass calc. = 2962.0  
mass found = 2962.8**10mer ATGC****5'-GTC ATG ATC T-3'**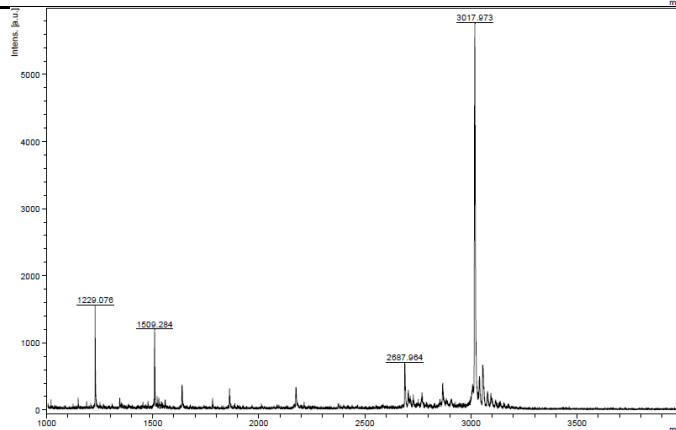mass calc. = 3019.0  
mass found = 3018.0

### CPG-oligonucleotide + Fe(acac)<sub>3</sub>

According to the representative procedure (RP-03) solid support coupled oligonucleotide (20 nmol) was treated with Fe(acac)<sub>3</sub> (200 equiv., 4 μmol) in dry ACN.

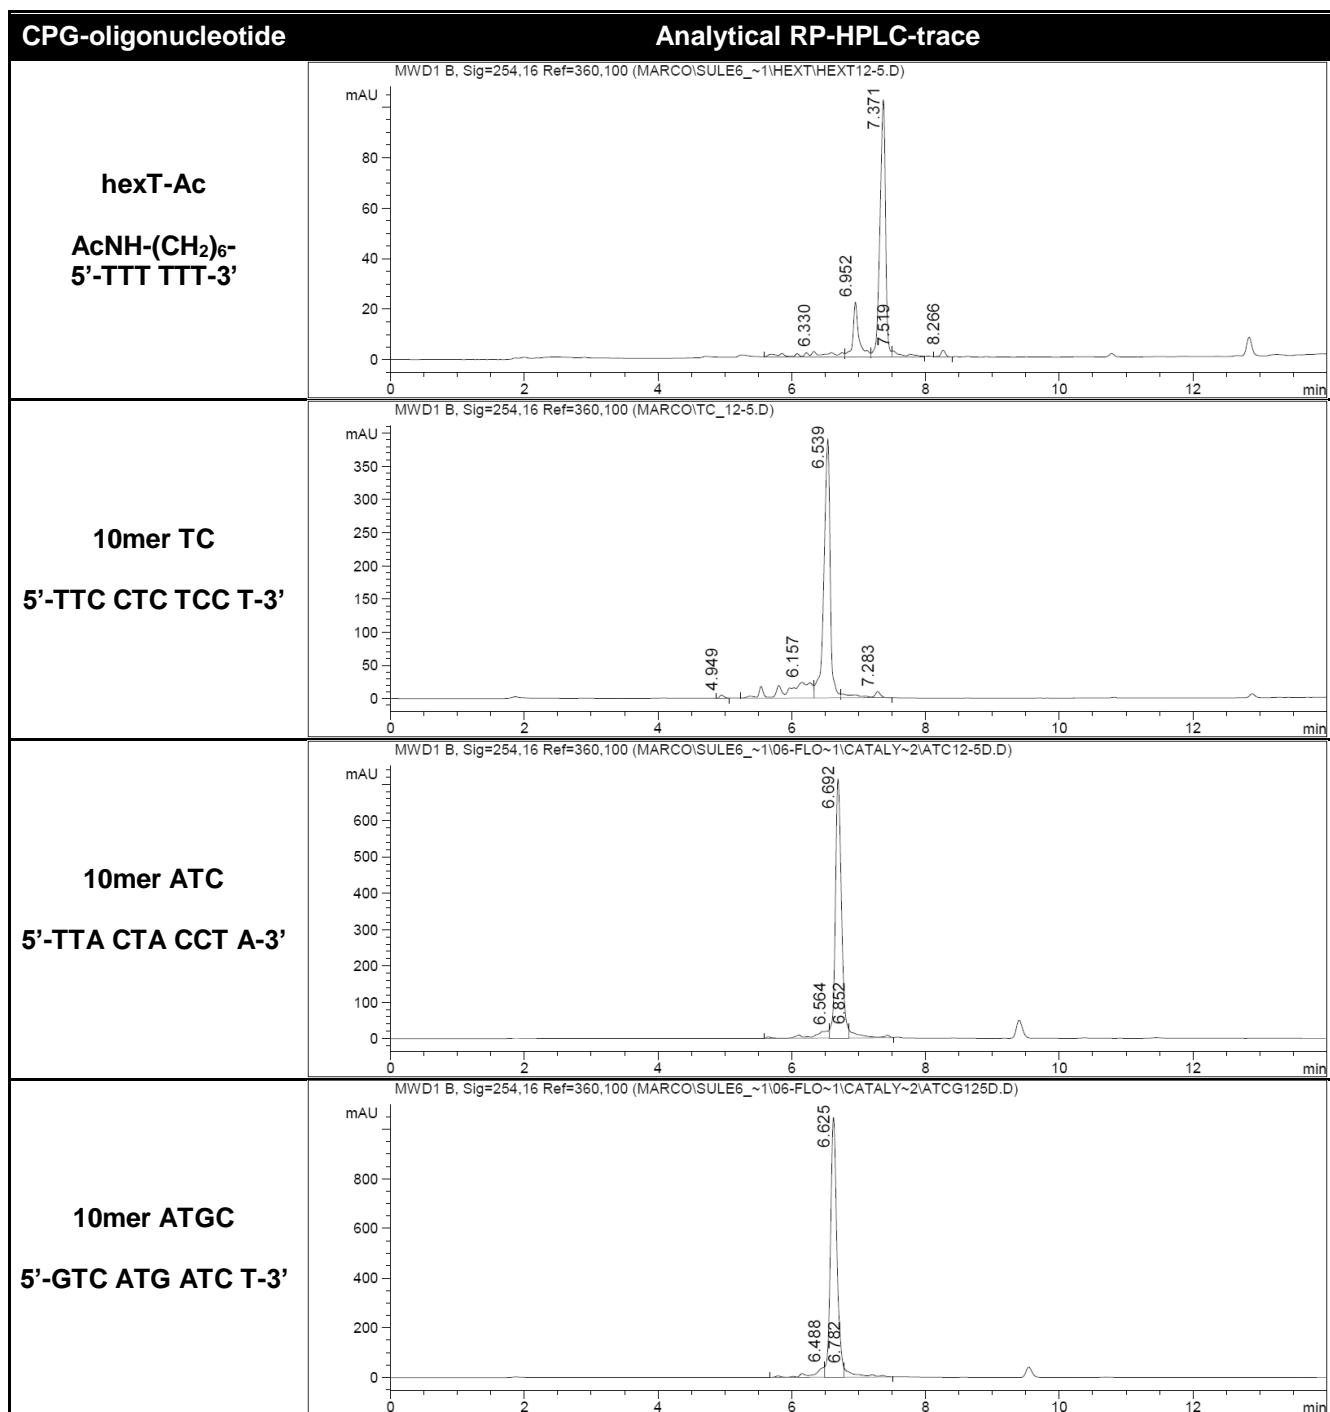

## CPG-oligonucleotide

## MALDI-MS spectra

**hexT-Ac****AcNH-(CH<sub>2</sub>)<sub>6</sub>-  
5'-TTT TTT-3'**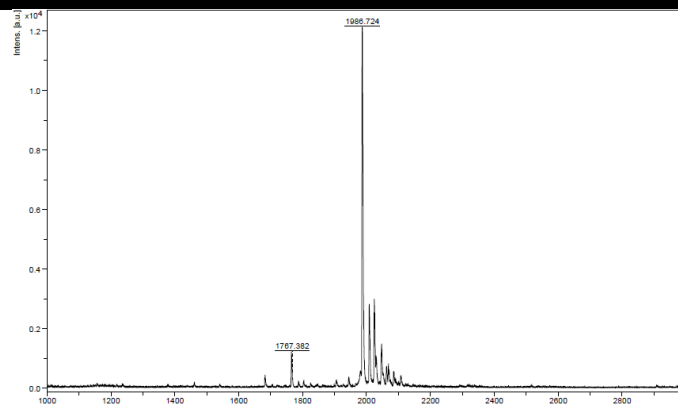mass calc. = 1985.4  
mass found = 1986.7**10mer TC****5'-TTC CTC TCC T-3'**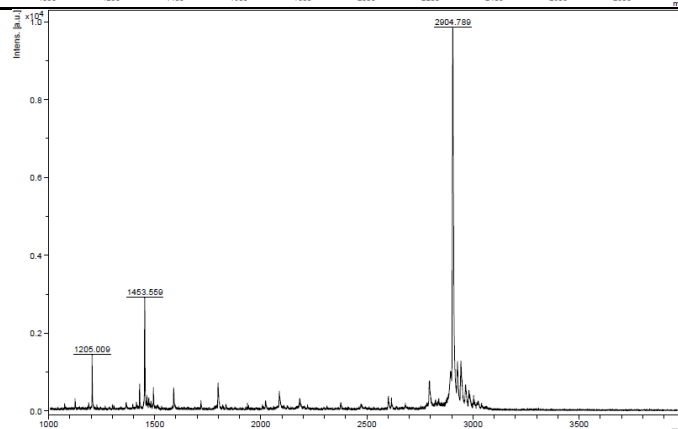mass calc. = 2904.9  
mass found = 2904.8**10mer ATC****5'-TTA CTA CCT A-3'**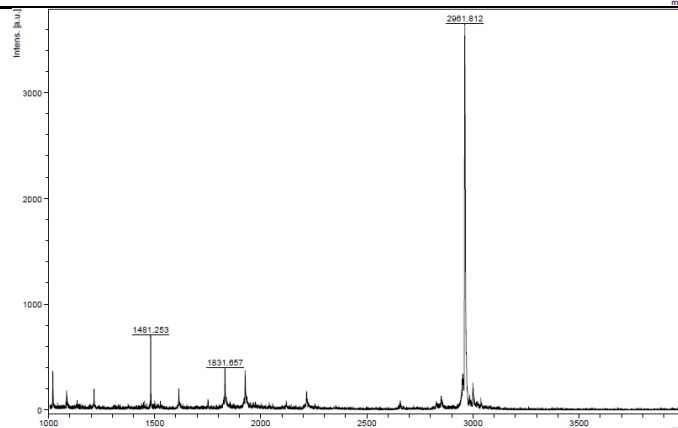mass calc. = 2962.0  
mass found = 2961.8**10mer ATGC****5'-GTC ATG ATC T-3'**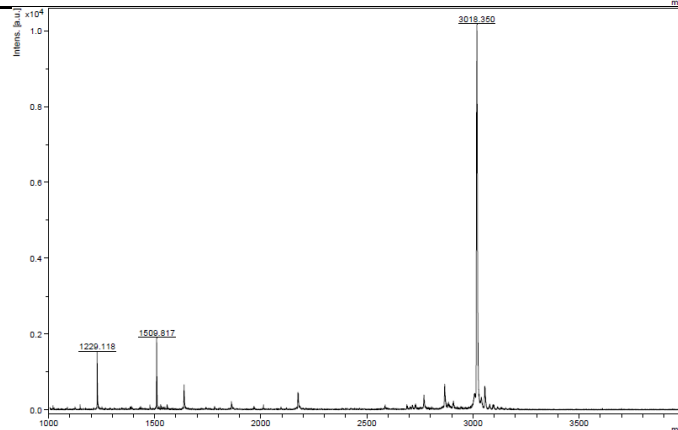mass calc. = 3019.0  
mass found = 3018.4

## CPG-oligonucleotide + FeCl<sub>2</sub> · 4 H<sub>2</sub>O

According to the representative procedure (RP-03) solid support coupled oligonucleotide (20 nmol) was treated with FeCl<sub>2</sub> · 4 H<sub>2</sub>O (200 equiv., 4 μmol) in dry ACN.

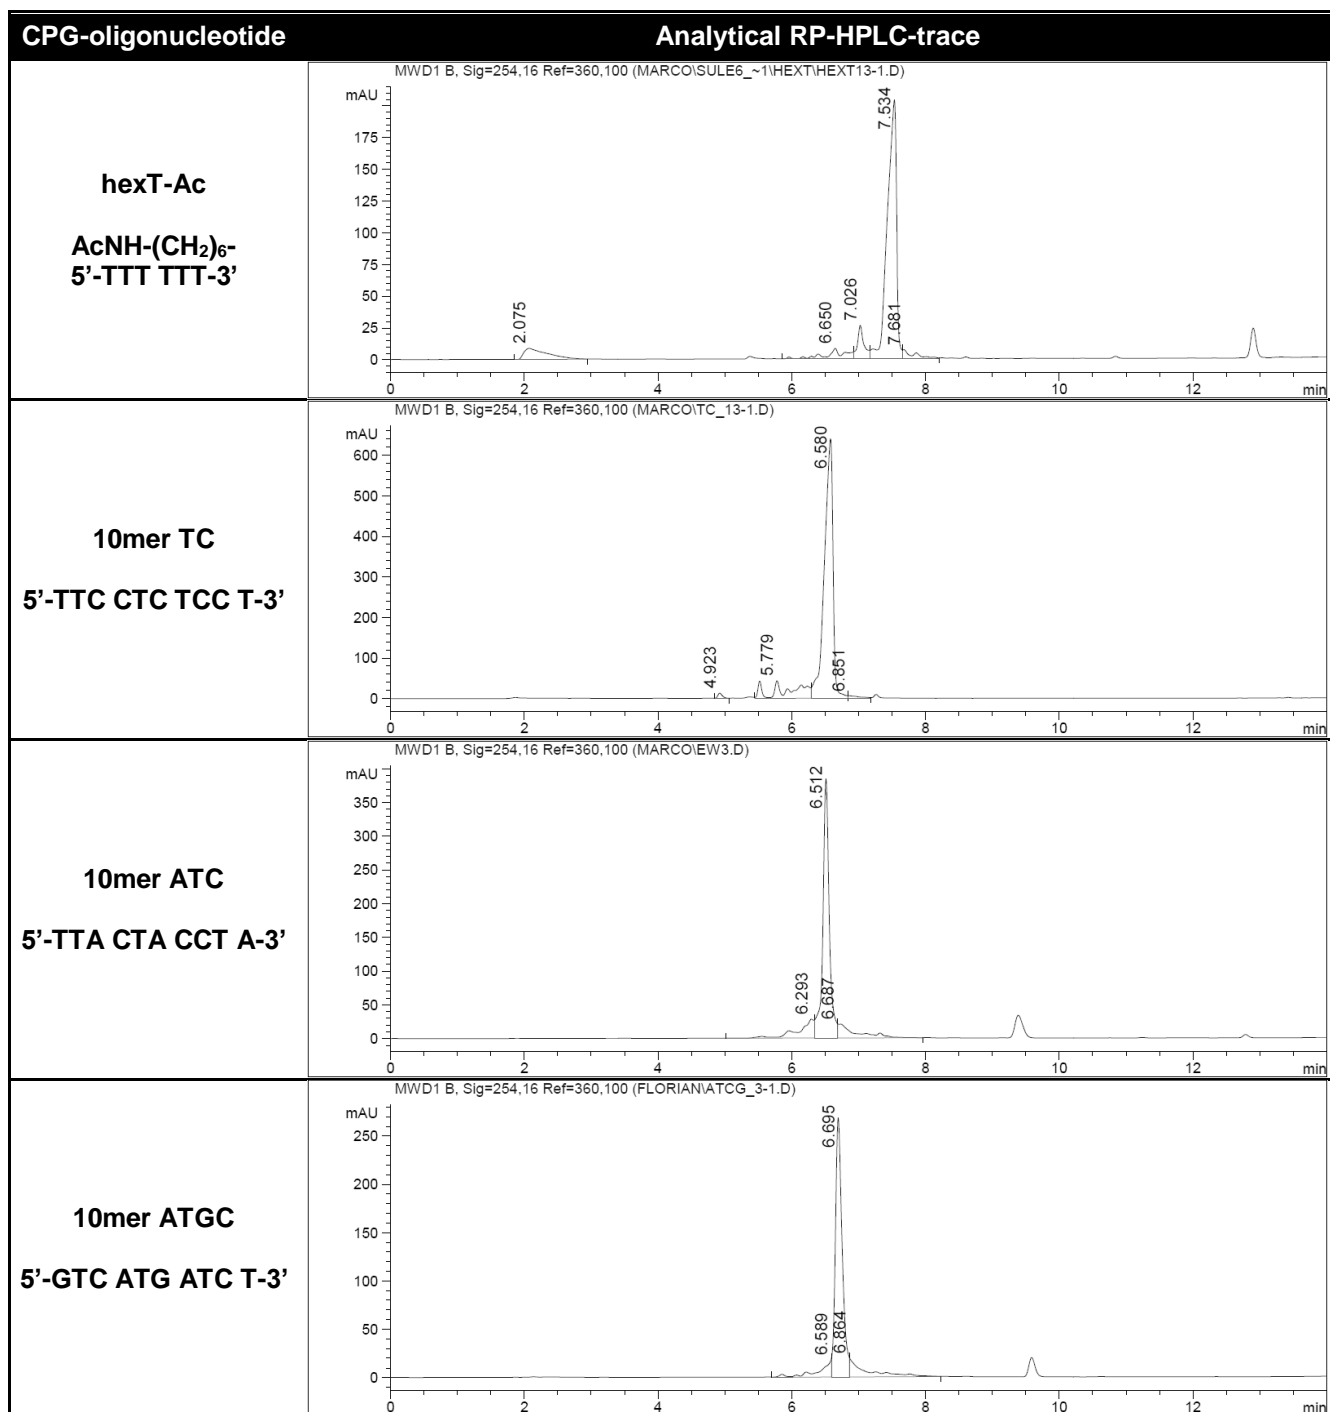

**CPG-oligonucleotide**
**MALDI-MS spectra**

**hexT-Ac**

**AcNH-(CH<sub>2</sub>)<sub>6</sub>-  
5'-TTT TTT-3'**

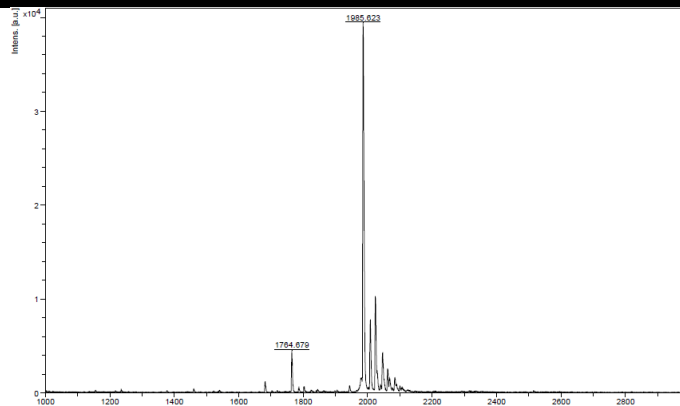

mass calc. = 1985.4  
mass found = 1985.6

**10mer TC**

**5'-TTC CTC TCC T-3'**

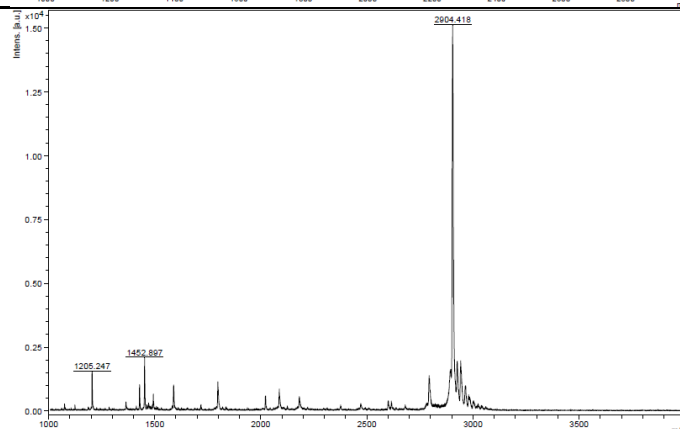

mass calc. = 2904.9  
mass found = 2904.4

**10mer ATC**

**5'-TTA CTA CCT A-3'**

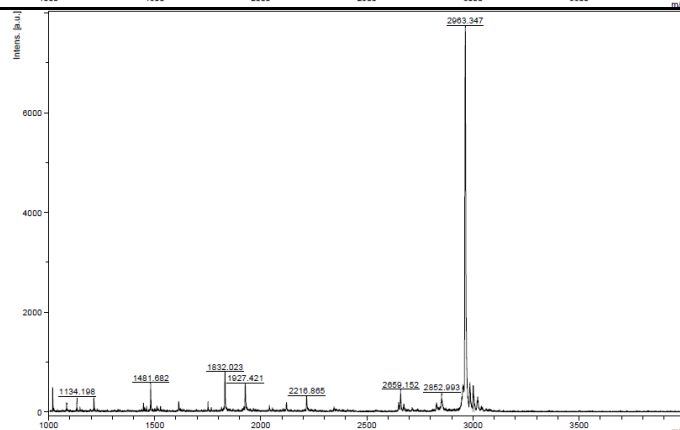

mass calc. = 2962.0  
mass found = 2963.3

**10mer ATGC**

**5'-GTC ATG ATC T-3'**

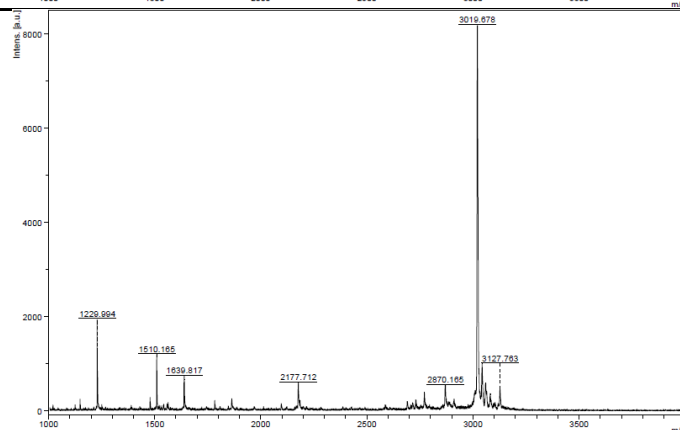

mass calc. = 3019.0  
mass found = 3019.7

## CPG-oligonucleotide + InCl<sub>3</sub>

According to the representative procedure (RP-03) solid support coupled oligonucleotide (20 nmol) was treated with InCl<sub>3</sub> (200 equiv., 4 µmol) in dry ACN.

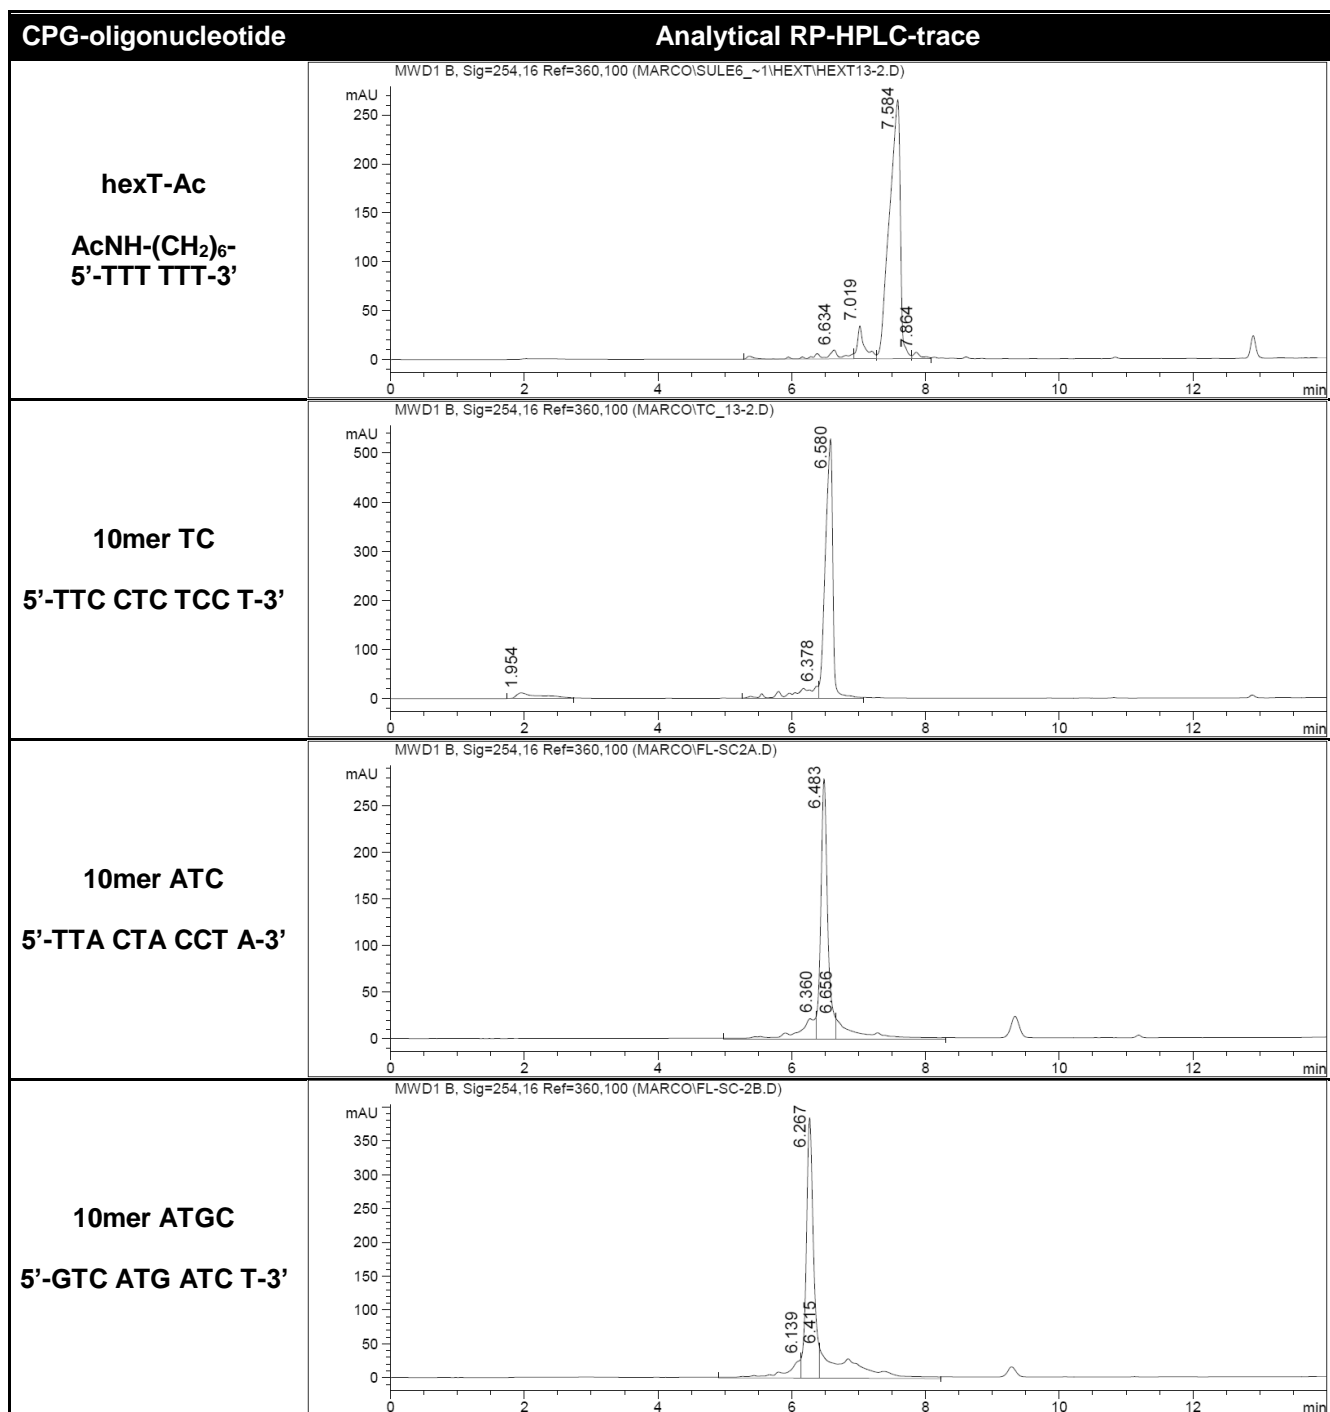

## CPG-oligonucleotide

## MALDI-MS spectra

**hexT-Ac****AcNH-(CH<sub>2</sub>)<sub>6</sub>-  
5'-TTT TTT-3'**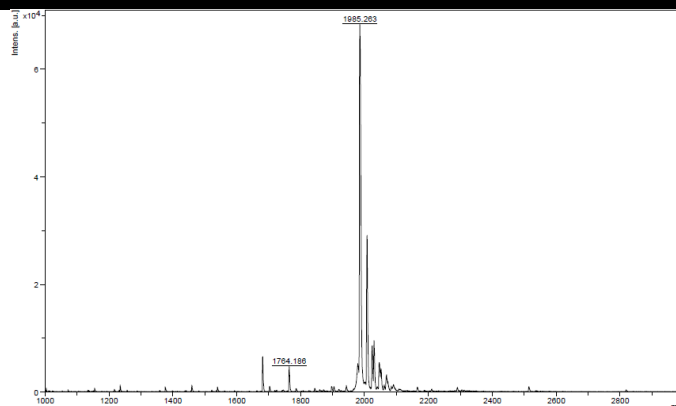mass calc. = 1985.4  
mass found = 1985.3**10mer TC****5'-TTC CTC TCC T-3'**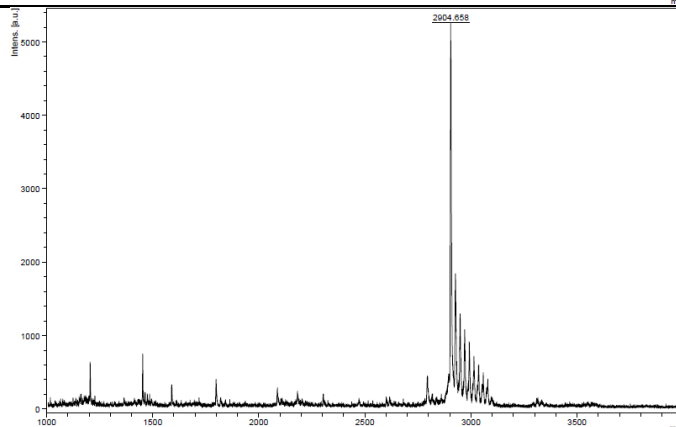mass calc. = 2904.9  
mass found = 2904.7**10mer ATC****5'-TTA CTA CCT A-3'**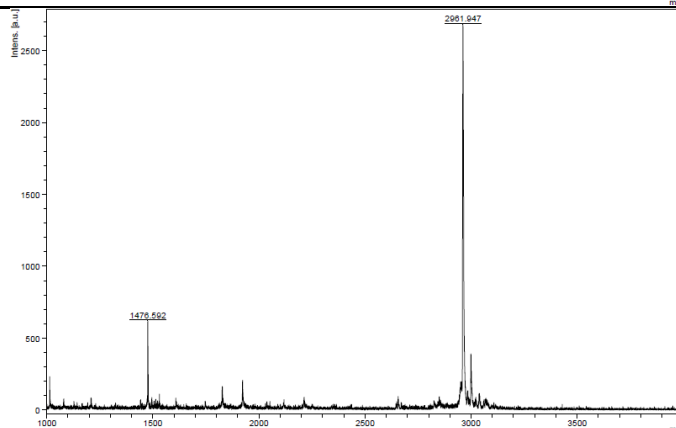mass calc. = 2962.0  
mass found = 2961.9**10mer ATGC****5'-GTC ATG ATC T-3'**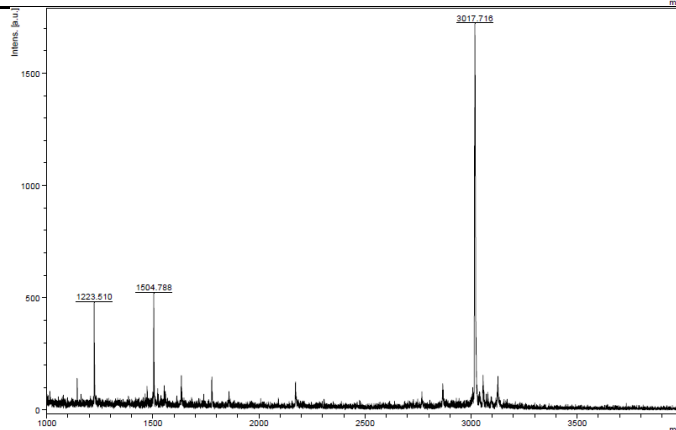mass calc. = 3019.0  
mass found = 3017.7



## CPG-oligonucleotide + La(O*i*Pr)<sub>3</sub>

According to the representative procedure (RP-03) solid support coupled oligonucleotide (20 nmol) was treated with La(O*i*Pr)<sub>3</sub> (200 equiv., 4 μmol) in dry THF.

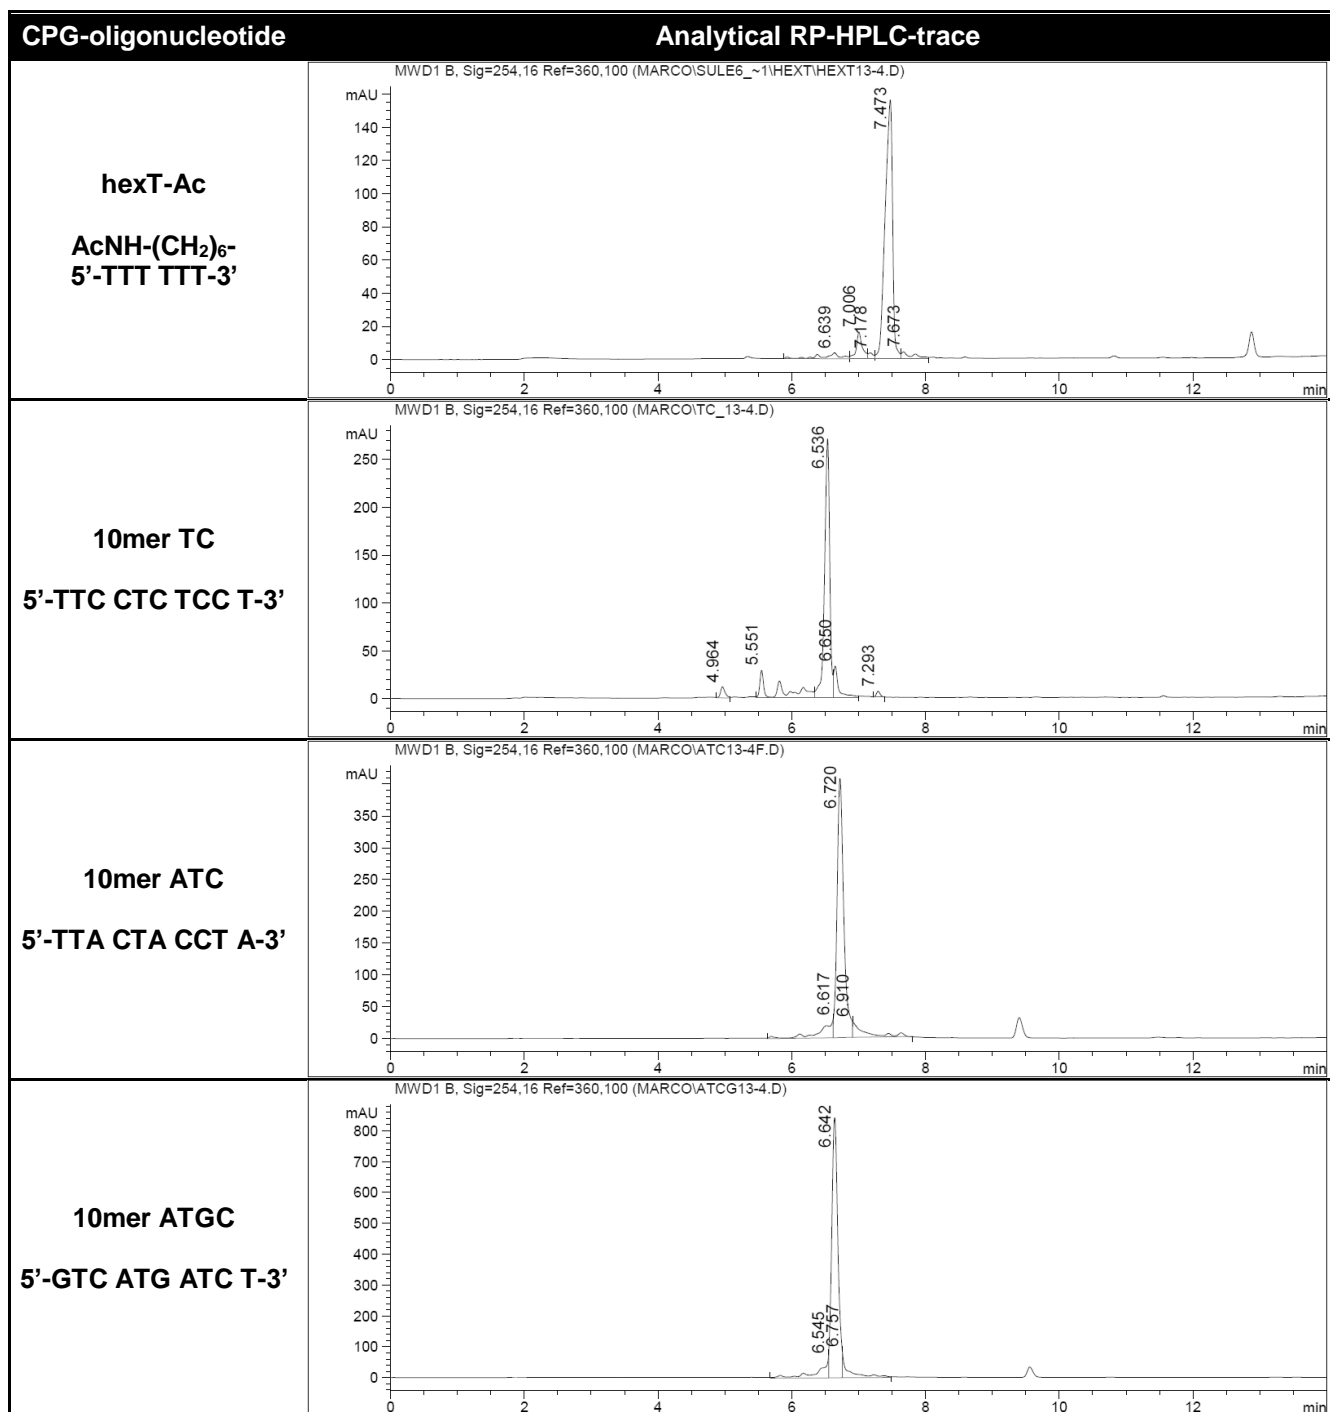

## CPG-oligonucleotide

## MALDI-MS spectra

hexT-Ac

 $\text{AcNH}-(\text{CH}_2)_6-$   
5'-TTT TTT-3'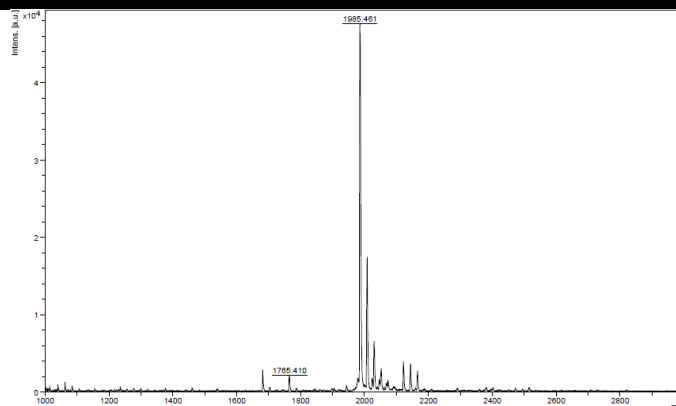mass calc. = 1985.4  
mass found = 1985.5

10mer TC

5'-TTC CTC TCC T-3'

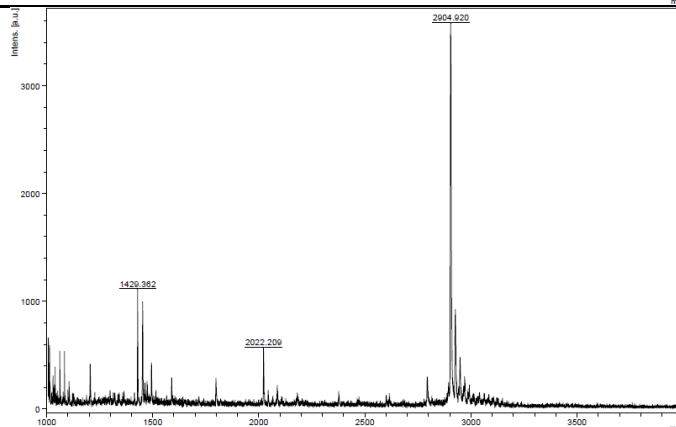mass calc. = 2904.9  
mass found = 2904.9

10mer ATC

5'-TTA CTA CCT A-3'

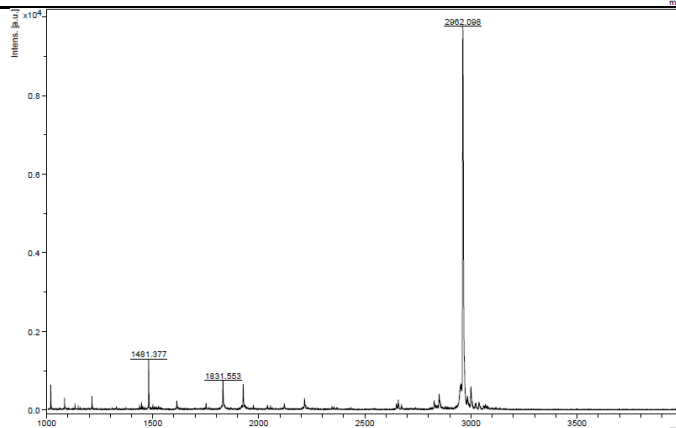mass calc. = 2962.0  
mass found = 2962.1

10mer ATGC

5'-GTC ATG ATC T-3'

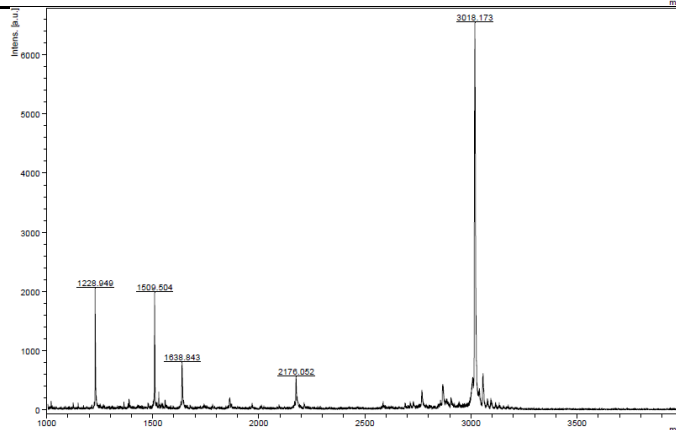mass calc. = 3019.0  
mass found = 3018.2

## CPG-oligonucleotide + LiBr

According to the representative procedure (RP-03) solid support coupled oligonucleotide (20 nmol) was treated with LiBr (200 equiv., 4  $\mu$ mol) in dry ACN.

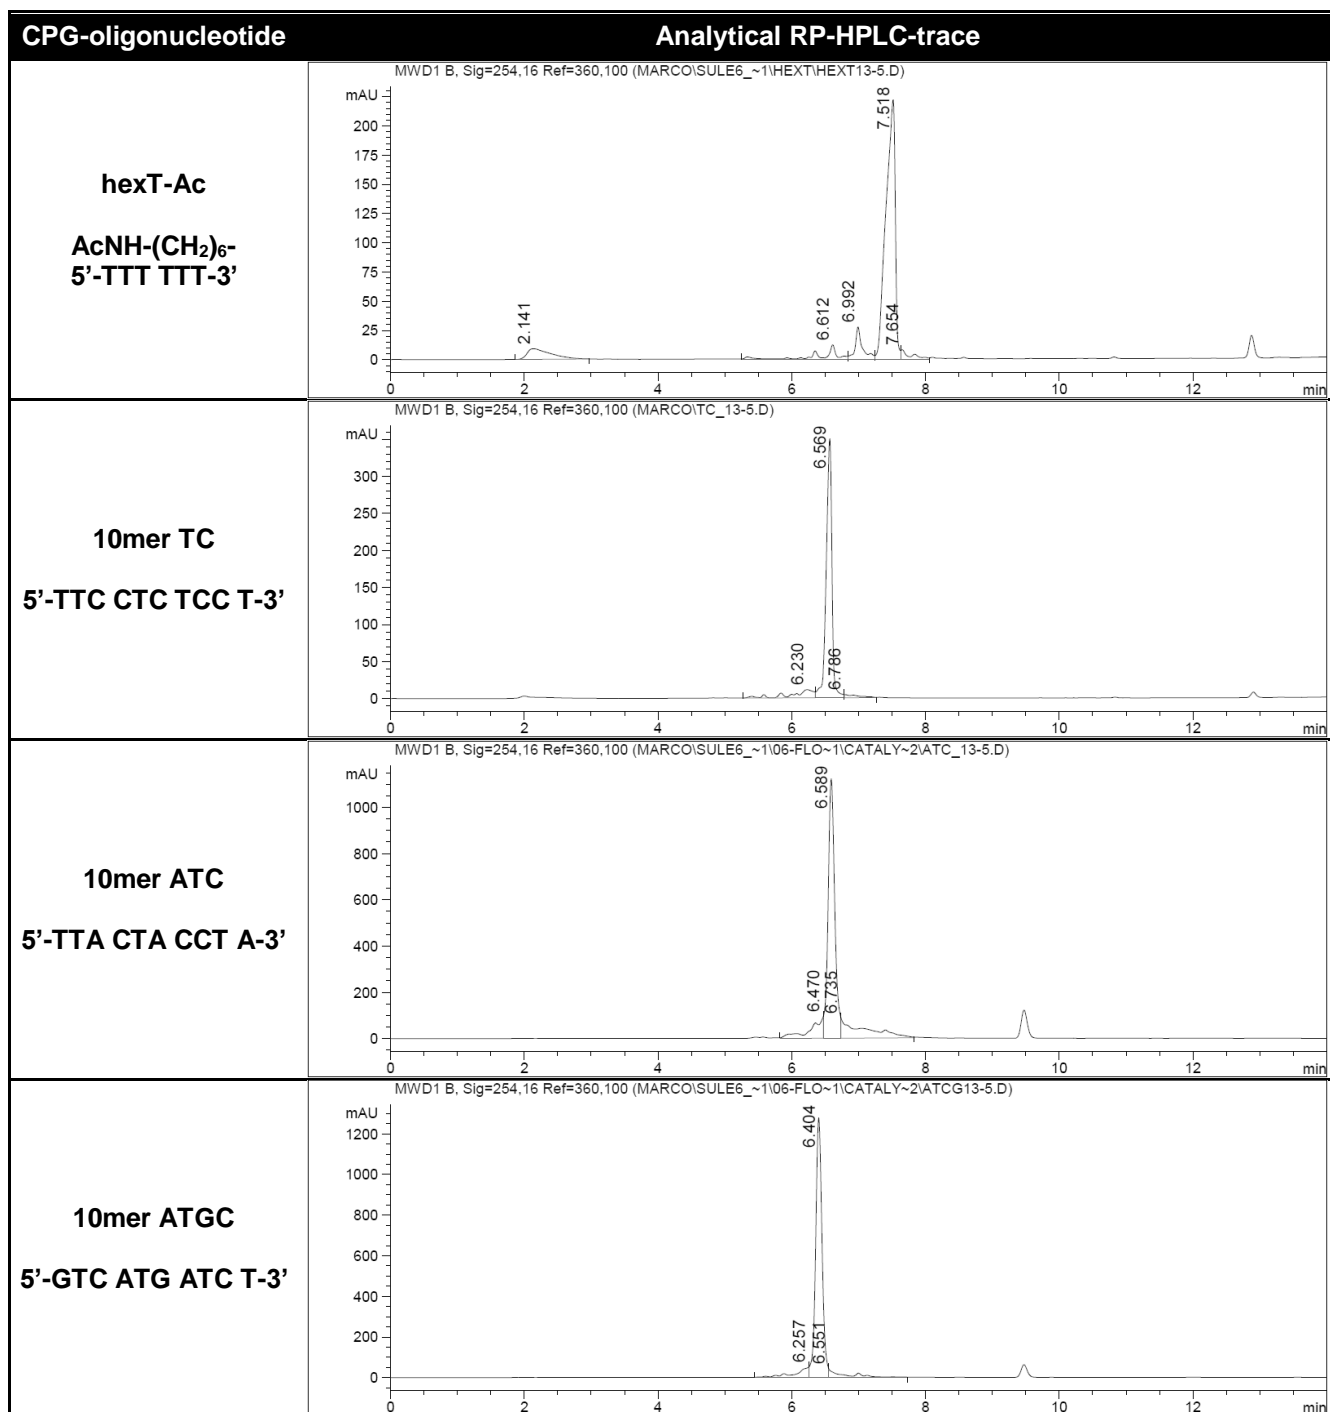

## CPG-oligonucleotide

## MALDI-MS spectra

hexT-Ac

 $\text{AcNH}-(\text{CH}_2)_6-$   
5'-TTT TTT-3'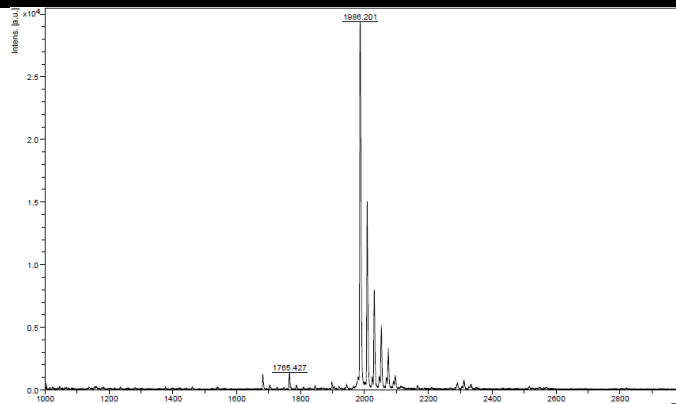mass calc. = 1985.4  
mass found = 1986.2

10mer TC

5'-TTC CTC TCC T-3'

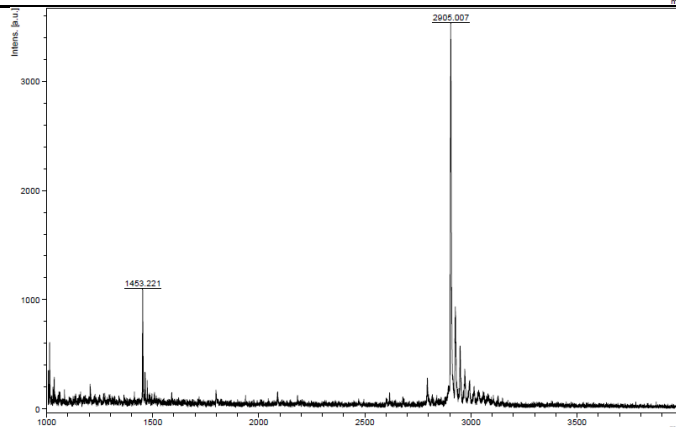mass calc. = 2904.9  
mass found = 2905.0

10mer ATC

5'-TTA CTA CCT A-3'

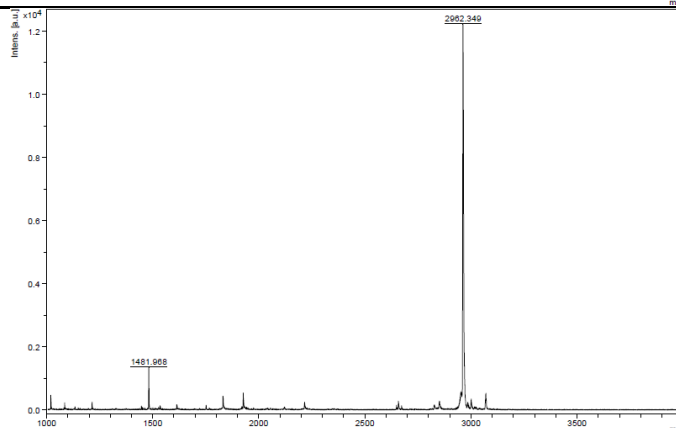mass calc. = 2962.0  
mass found = 2962.3

10mer ATGC

5'-GTC ATG ATC T-3'

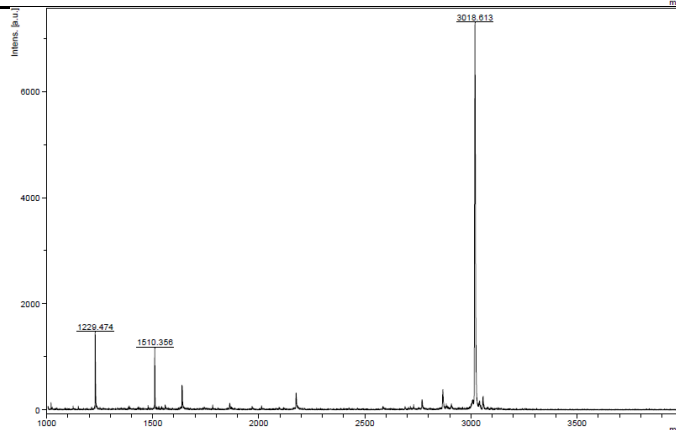mass calc. = 3019.0  
mass found = 3018.6

## CPG-oligonucleotide + Mg(ClO<sub>4</sub>)<sub>2</sub>

According to the representative procedure (RP-03) solid support coupled oligonucleotide (20 nmol) was treated with Mg(ClO<sub>4</sub>)<sub>2</sub> (200 equiv., 4 μmol) in dry MeOH.

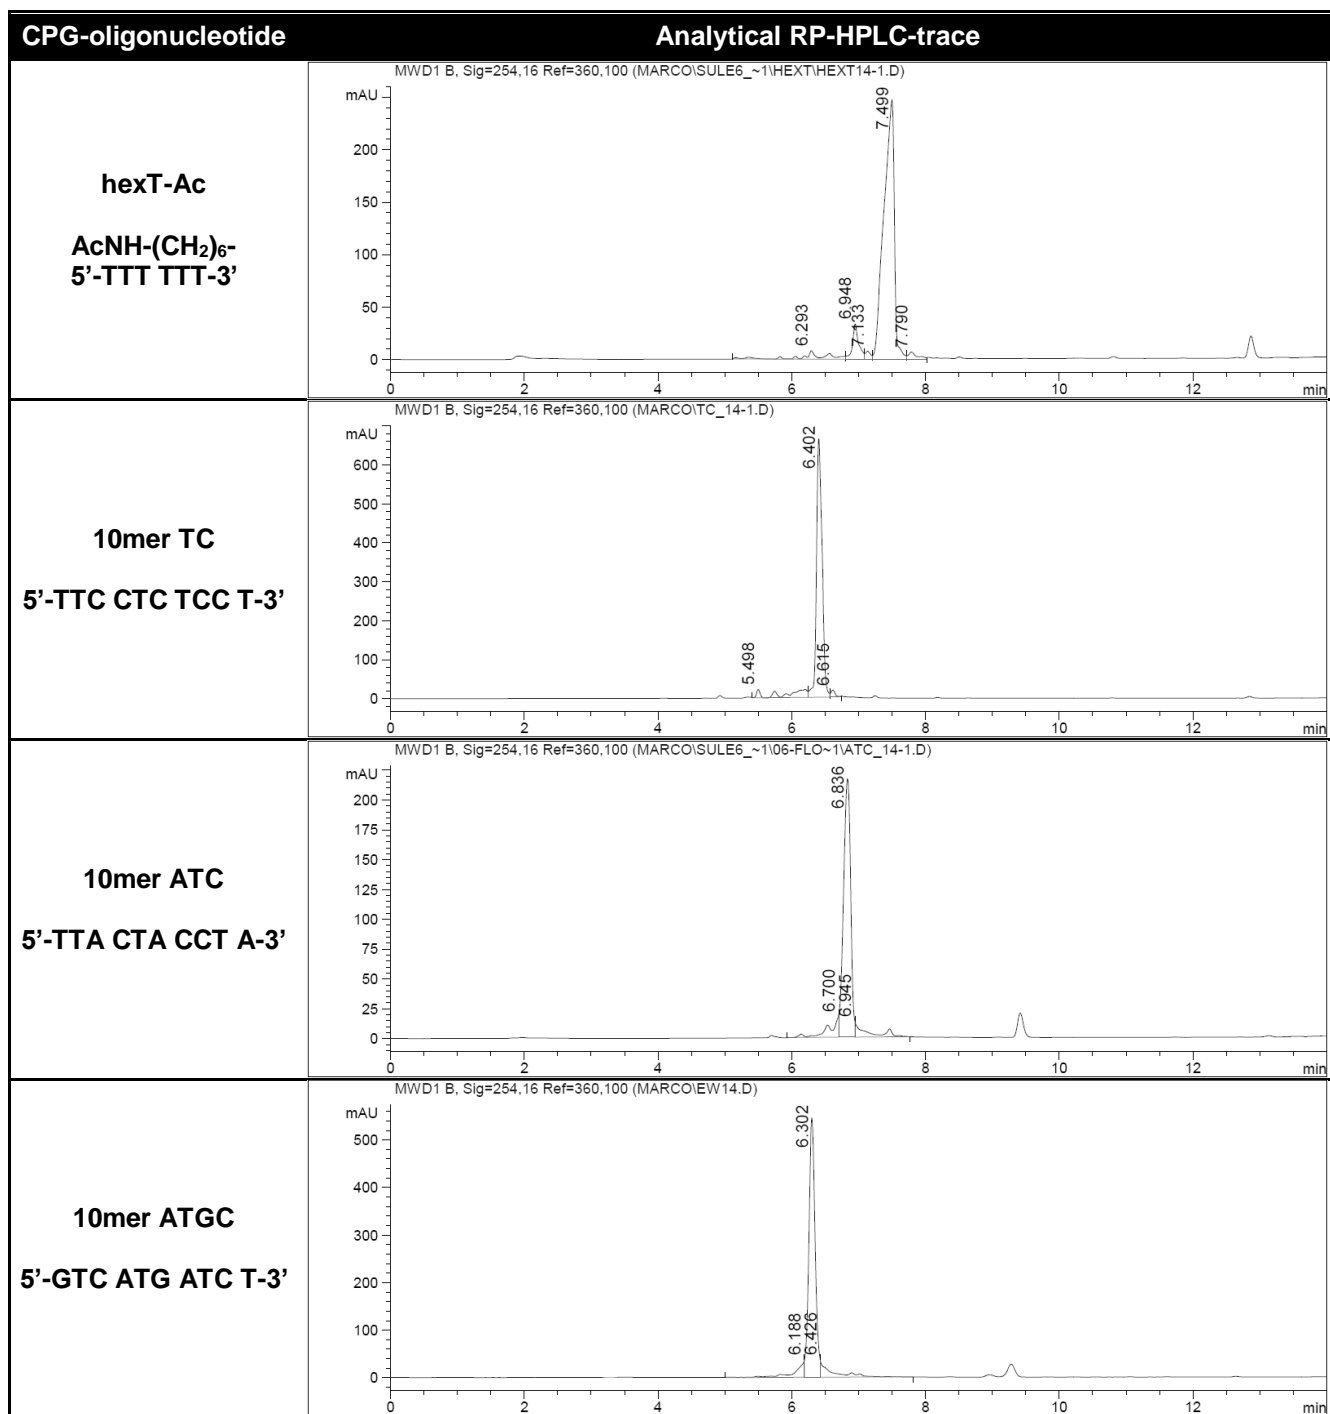

## CPG-oligonucleotide

## MALDI-MS spectra

hexT-Ac

 $\text{AcNH}-(\text{CH}_2)_6-$   
5'-TTT TTT-3'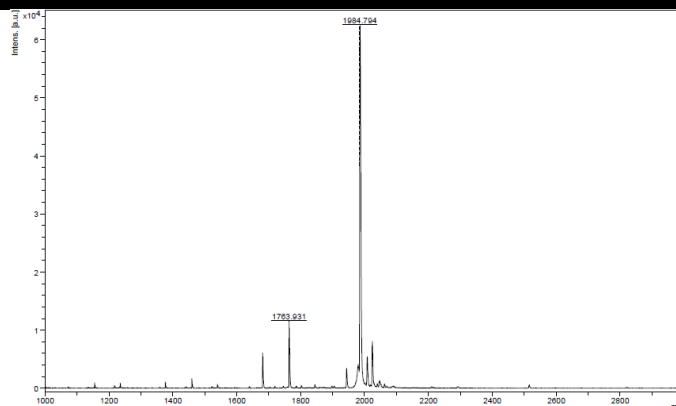mass calc. = 1985.4  
mass found = 1984.8

10mer TC

5'-TTC CTC TCC T-3'

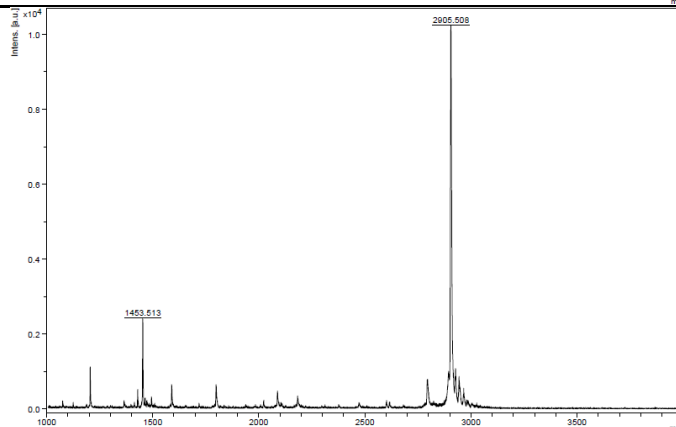mass calc. = 2904.9  
mass found = 2905.5

10mer ATC

5'-TTA CTA CCT A-3'

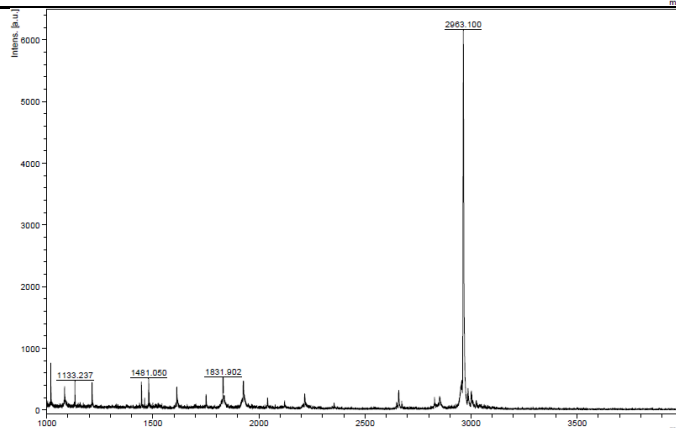mass calc. = 2962.0  
mass found = 2963.1

10mer ATGC

5'-GTC ATG ATC T-3'

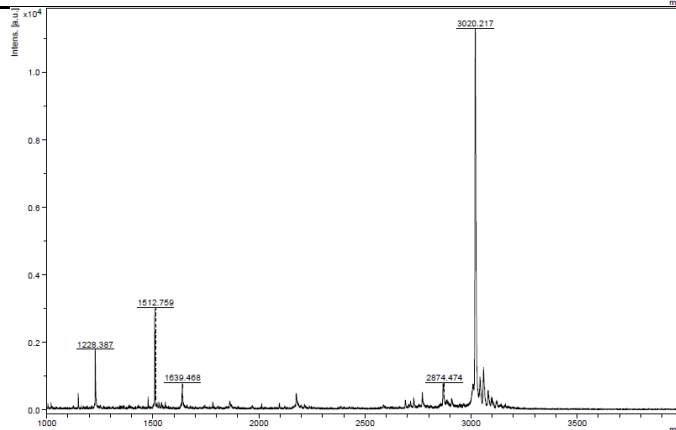mass calc. = 3019.0  
mass found = 3020.2

## CPG-oligonucleotide + Ni(acac)<sub>2</sub>

According to the representative procedure (RP-03) solid support coupled oligonucleotide (20 nmol) was treated with Ni(acac)<sub>2</sub> (200 equiv., 4 μmol) in dry ACN.

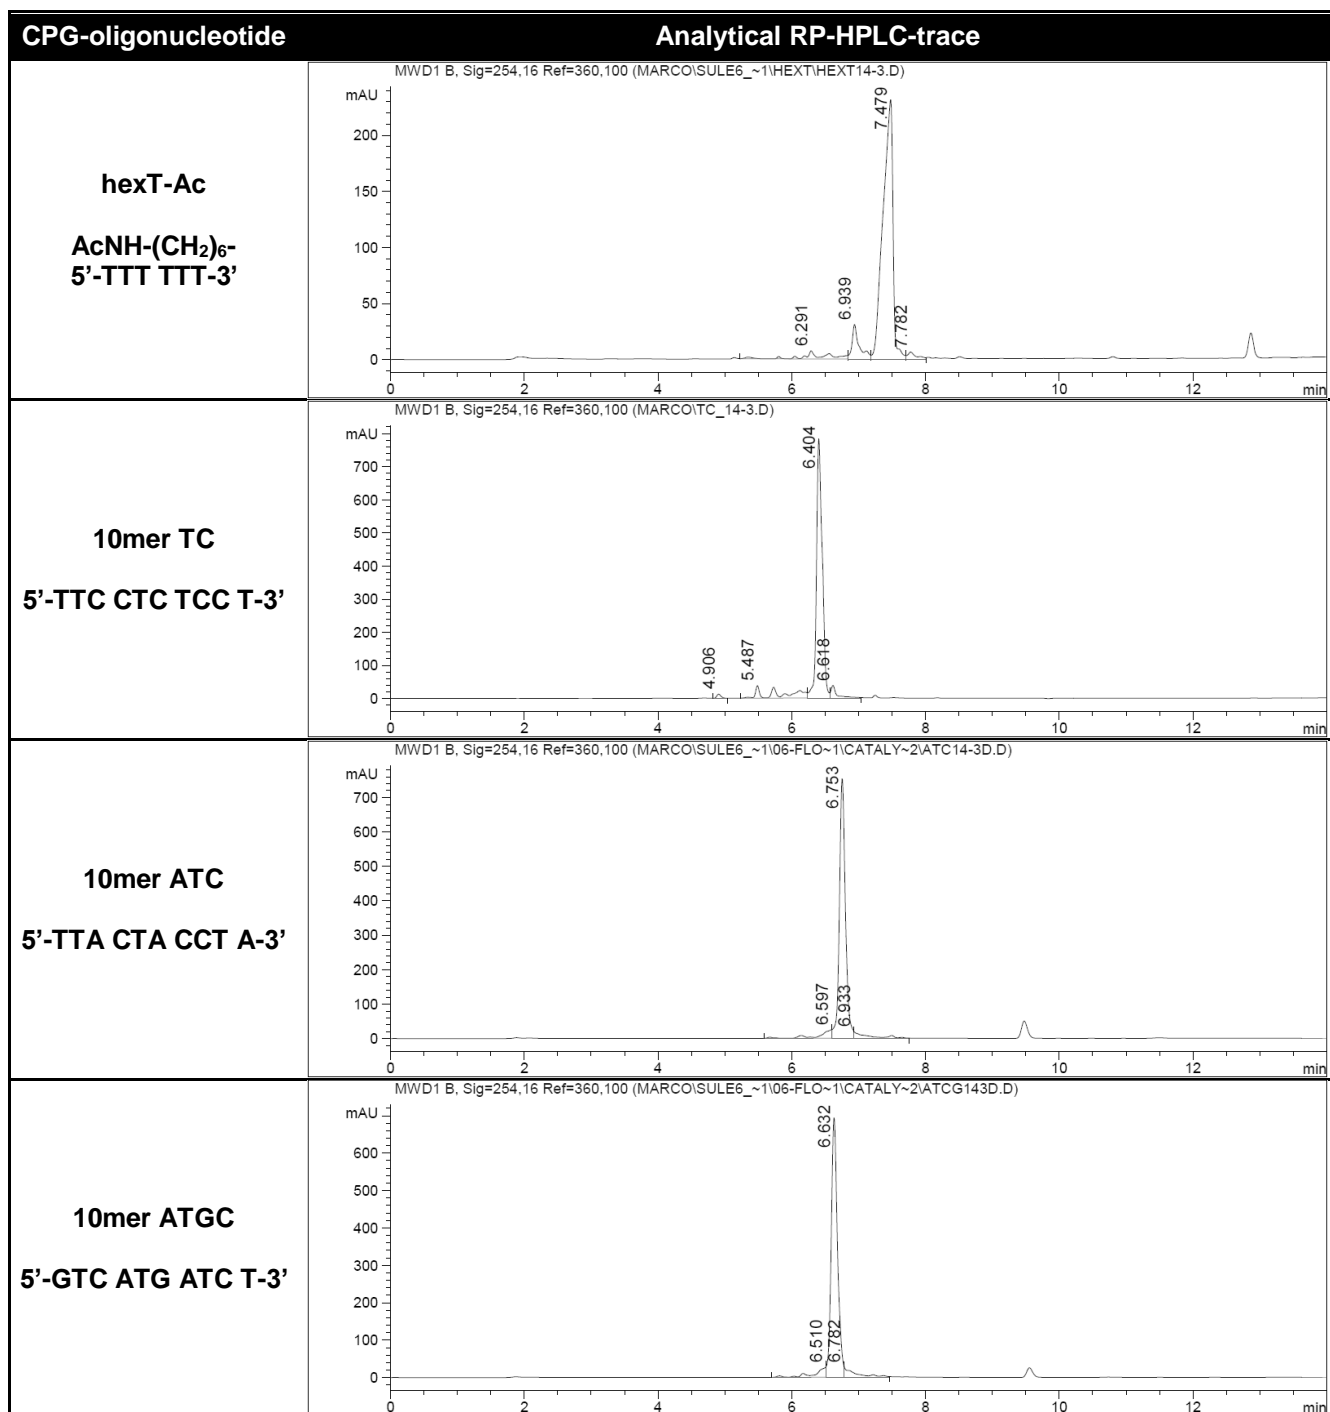

## CPG-oligonucleotide

## MALDI-MS spectra

hexT-Ac

 $\text{AcNH}-(\text{CH}_2)_6-$   
5'-TTT TTT-3'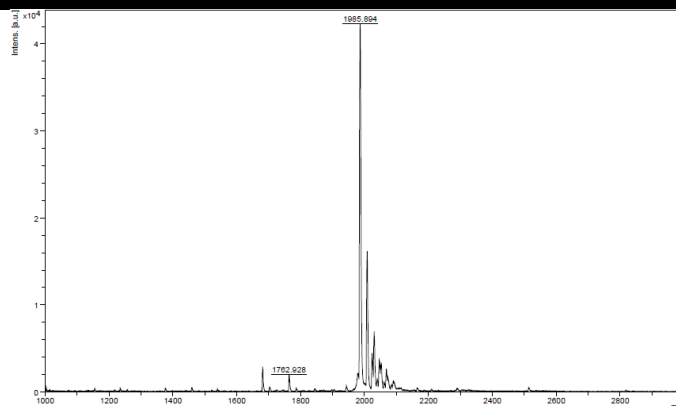mass calc. = 1985.4  
mass found = 1985.9

10mer TC

5'-TTC CTC TCC T-3'

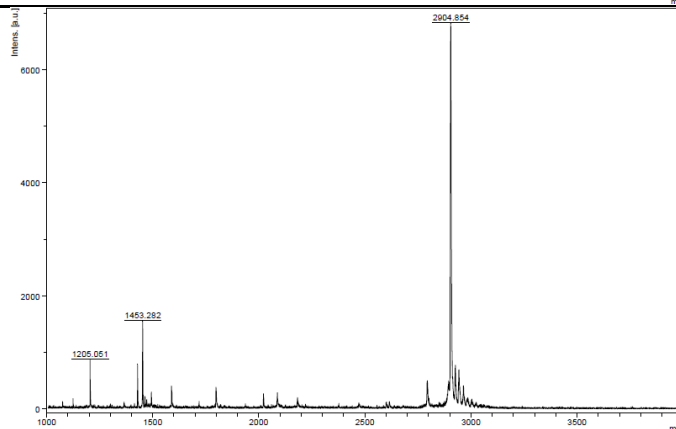mass calc. = 2904.9  
mass found = 2904.9

10mer ATC

5'-TTA CTA CCT A-3'

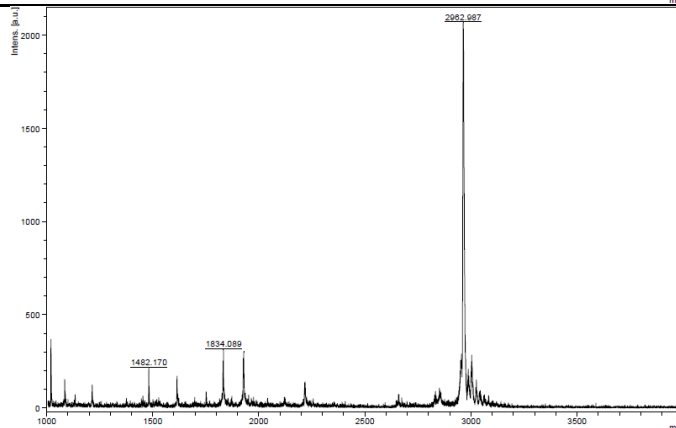mass calc. = 2962.0  
mass found = 2963.0

10mer ATGC

5'-GTC ATG ATC T-3'

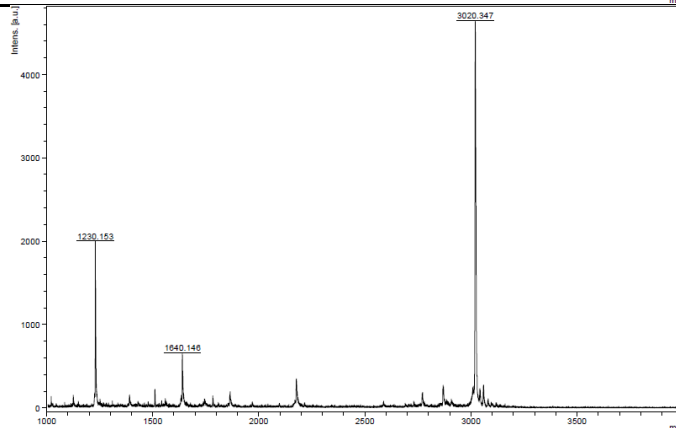mass calc. = 3019.0  
mass found = 3020.3



## CPG-oligonucleotide + Ni(PPh<sub>3</sub>)<sub>2</sub>Cl<sub>2</sub>

According to the representative procedure (RP-03) solid support coupled oligonucleotide (20 nmol) was treated with Ni(PPh<sub>3</sub>)<sub>2</sub>Cl<sub>2</sub> (200 equiv., 4  $\mu$ mol) in dry MeOH.

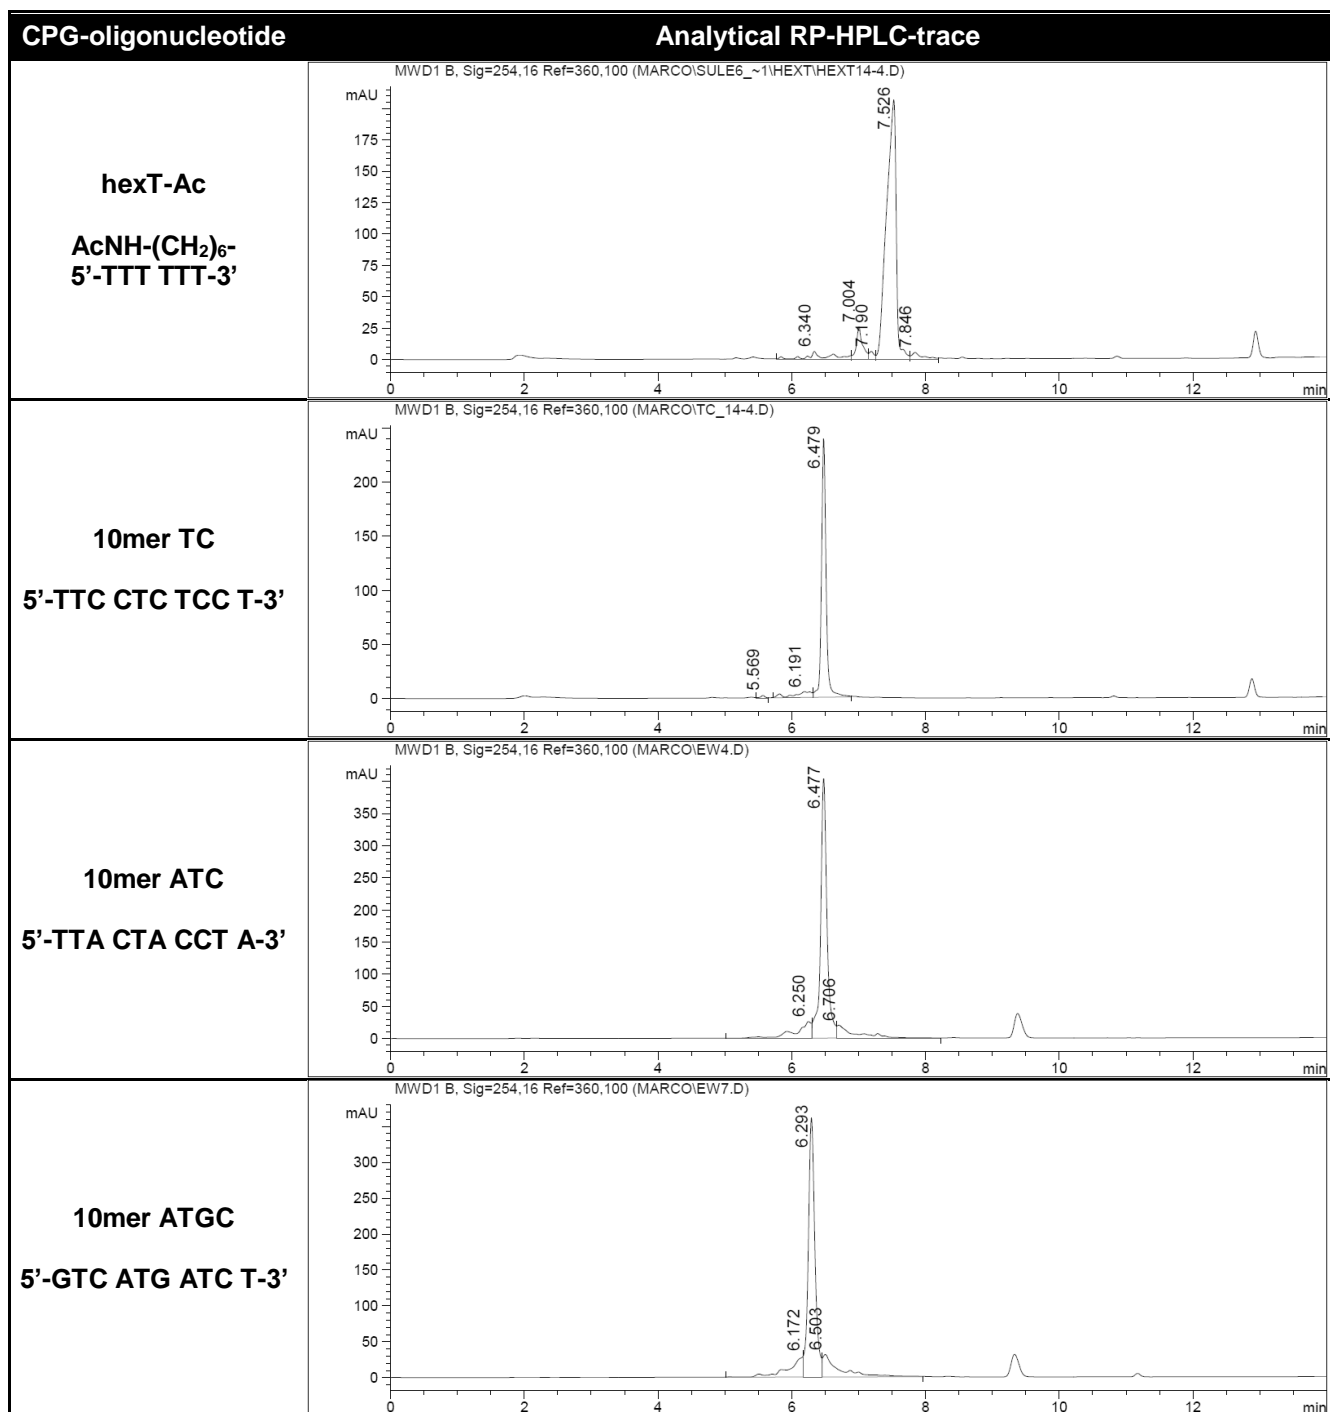

## CPG-oligonucleotide

## MALDI-MS spectra

hexT-Ac

 $\text{AcNH}-(\text{CH}_2)_6-$   
5'-TTT TTT-3'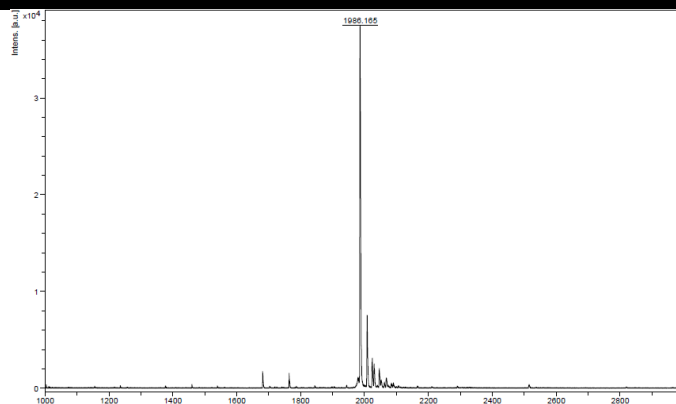mass calc. = 1985.4  
mass found = 1986.2

10mer TC

5'-TTC CTC TCC T-3'

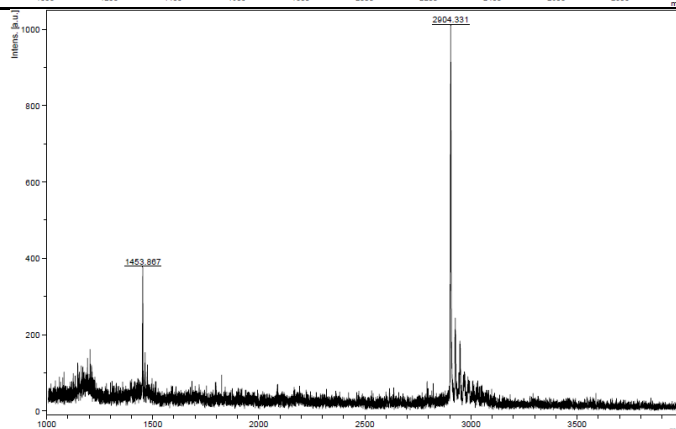mass calc. = 2904.9  
mass found = 2904.3

10mer ATC

5'-TTA CTA CCT A-3'

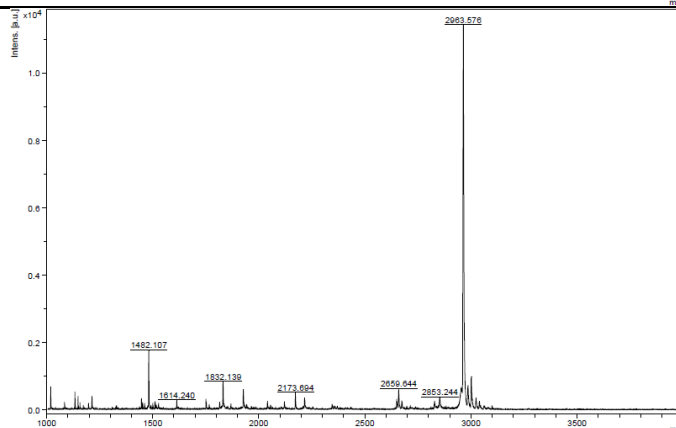mass calc. = 2962.0  
mass found = 2963.6

10mer ATGC

5'-GTC ATG ATC T-3'

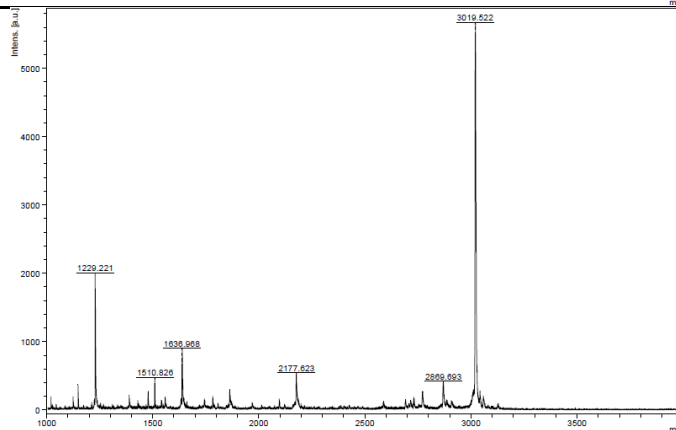mass calc. = 3019.0  
mass found = 3019.5

## CPG-oligonucleotide + Pd(dba)<sub>3</sub>

According to the representative procedure (RP-03) solid support coupled oligonucleotide (20 nmol) was treated with Pd(dba)<sub>3</sub> (200 equiv., 4 μmol) in dry MeOH.

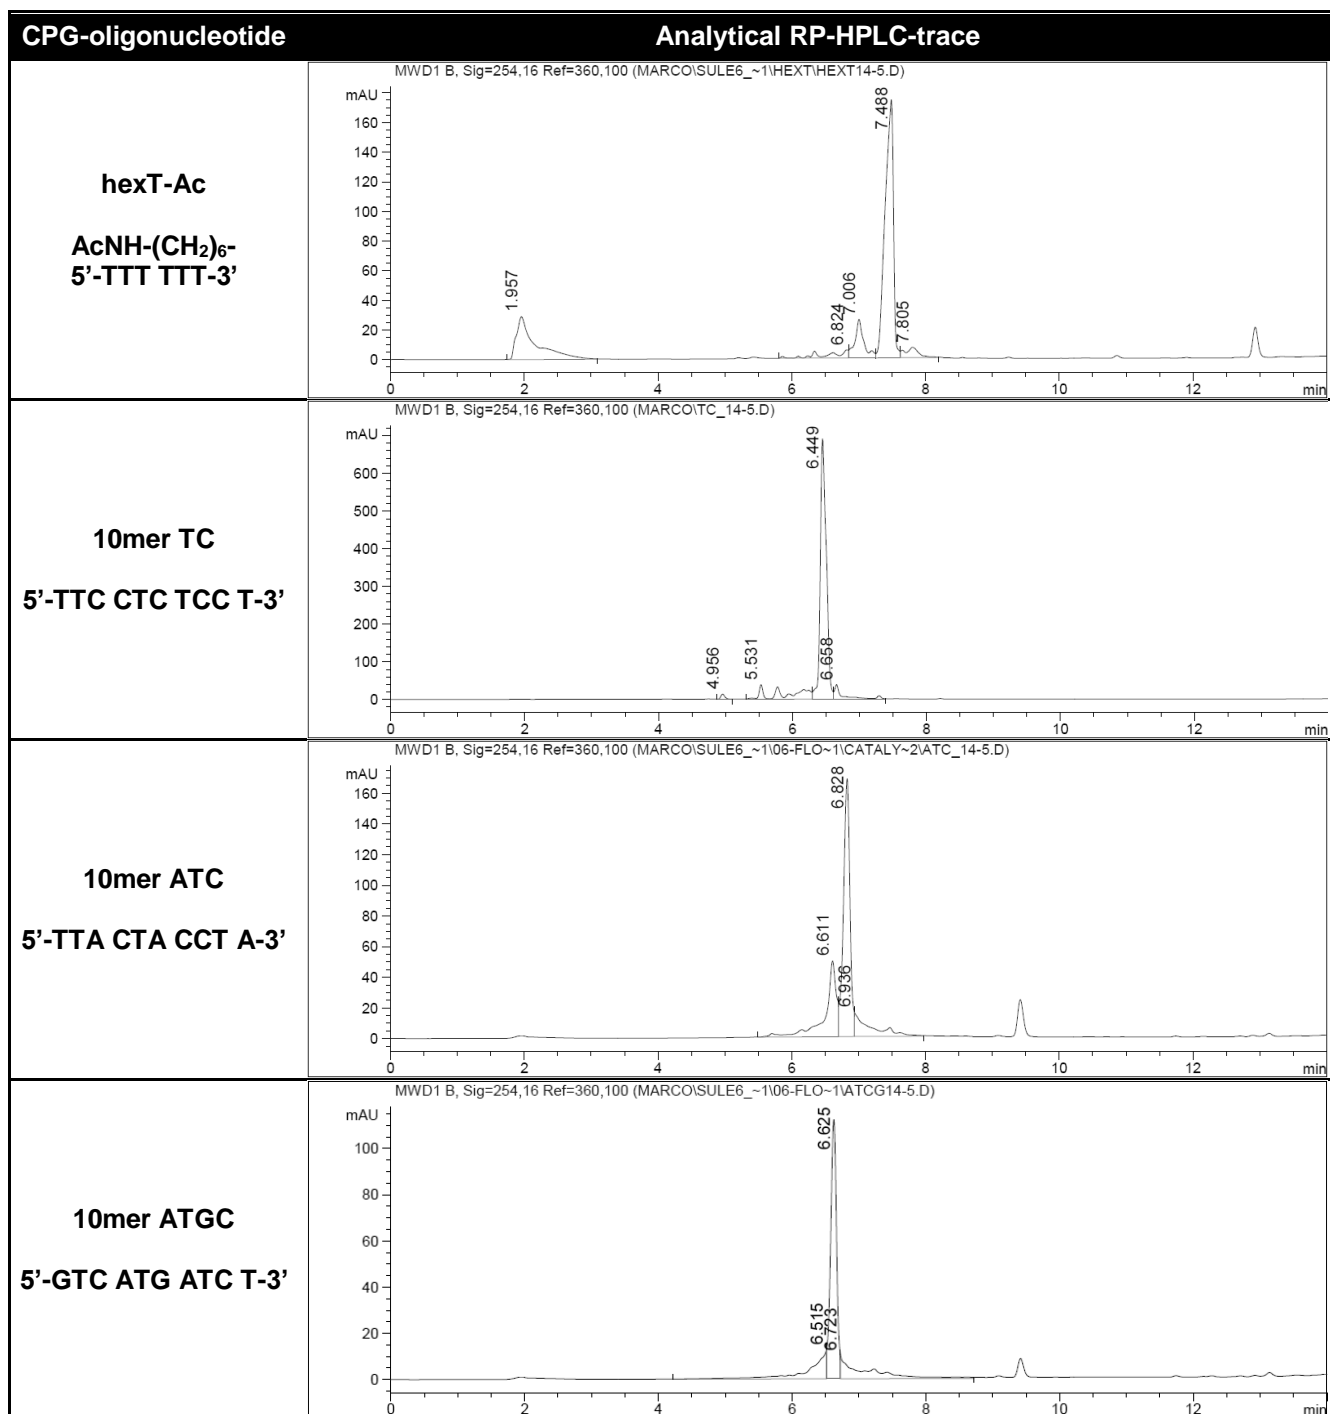

## CPG-oligonucleotide

## MALDI-MS spectra

hexT-Ac

 $\text{AcNH}-(\text{CH}_2)_6-$   
5'-TTT TTT-3'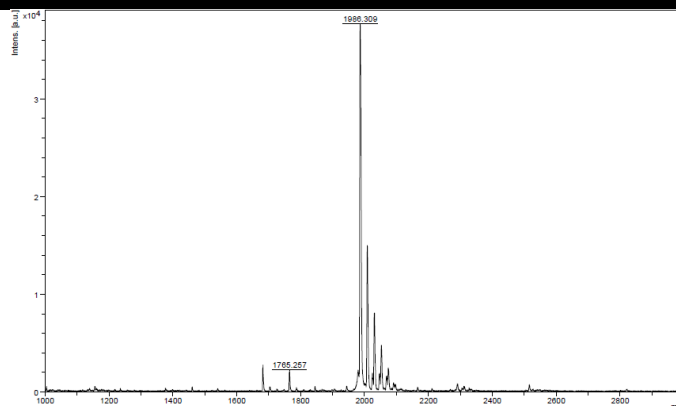mass calc. = 1985.4  
mass found = 1986.3

10mer TC

5'-TTC CTC TCC T-3'

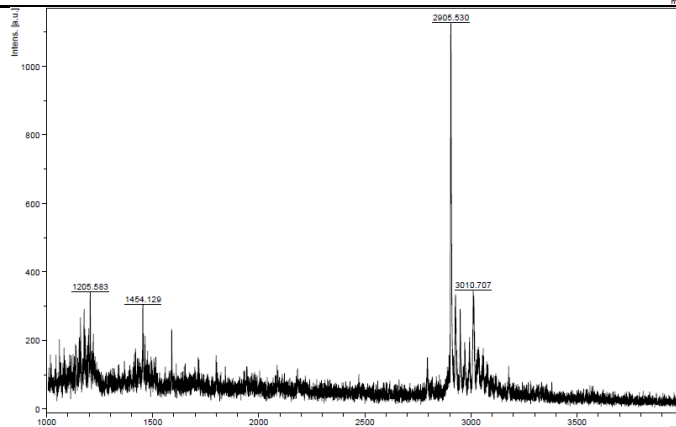mass calc. = 2904.9  
mass found = 2905.5

10mer ATC

5'-TTA CTA CCT A-3'

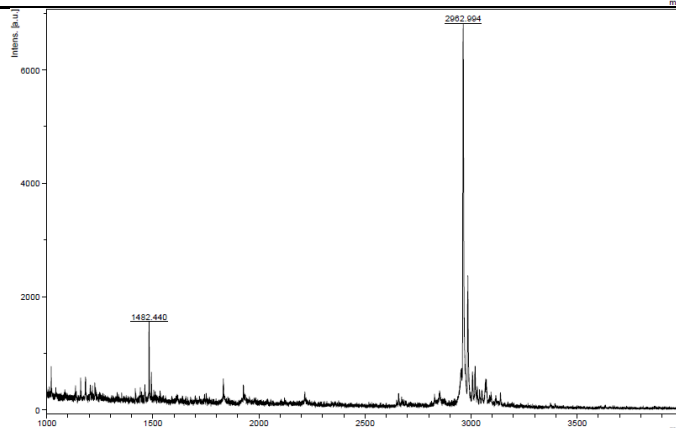mass calc. = 2962.0  
mass found = 2963.0

10mer ATGC

5'-GTC ATG ATC T-3'

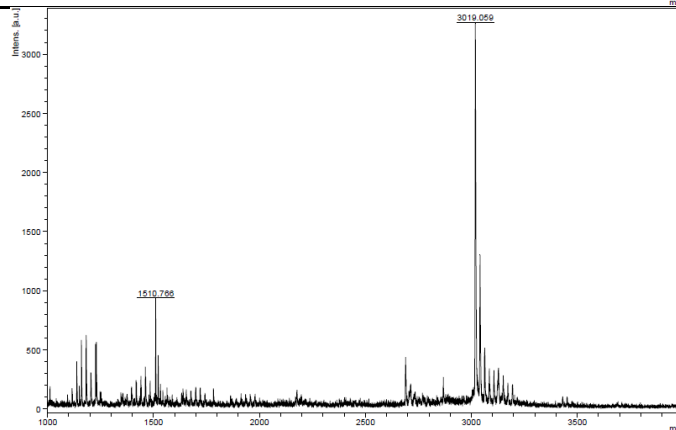mass calc. = 3019.0  
mass found = 3019.1

## CPG-oligonucleotide + Pd(OAc)<sub>2</sub>

According to the representative procedure (RP-03) solid support coupled oligonucleotide (20 nmol) was treated with Pd(OAc)<sub>2</sub> (200 equiv., 4 μmol) in dry ACN.

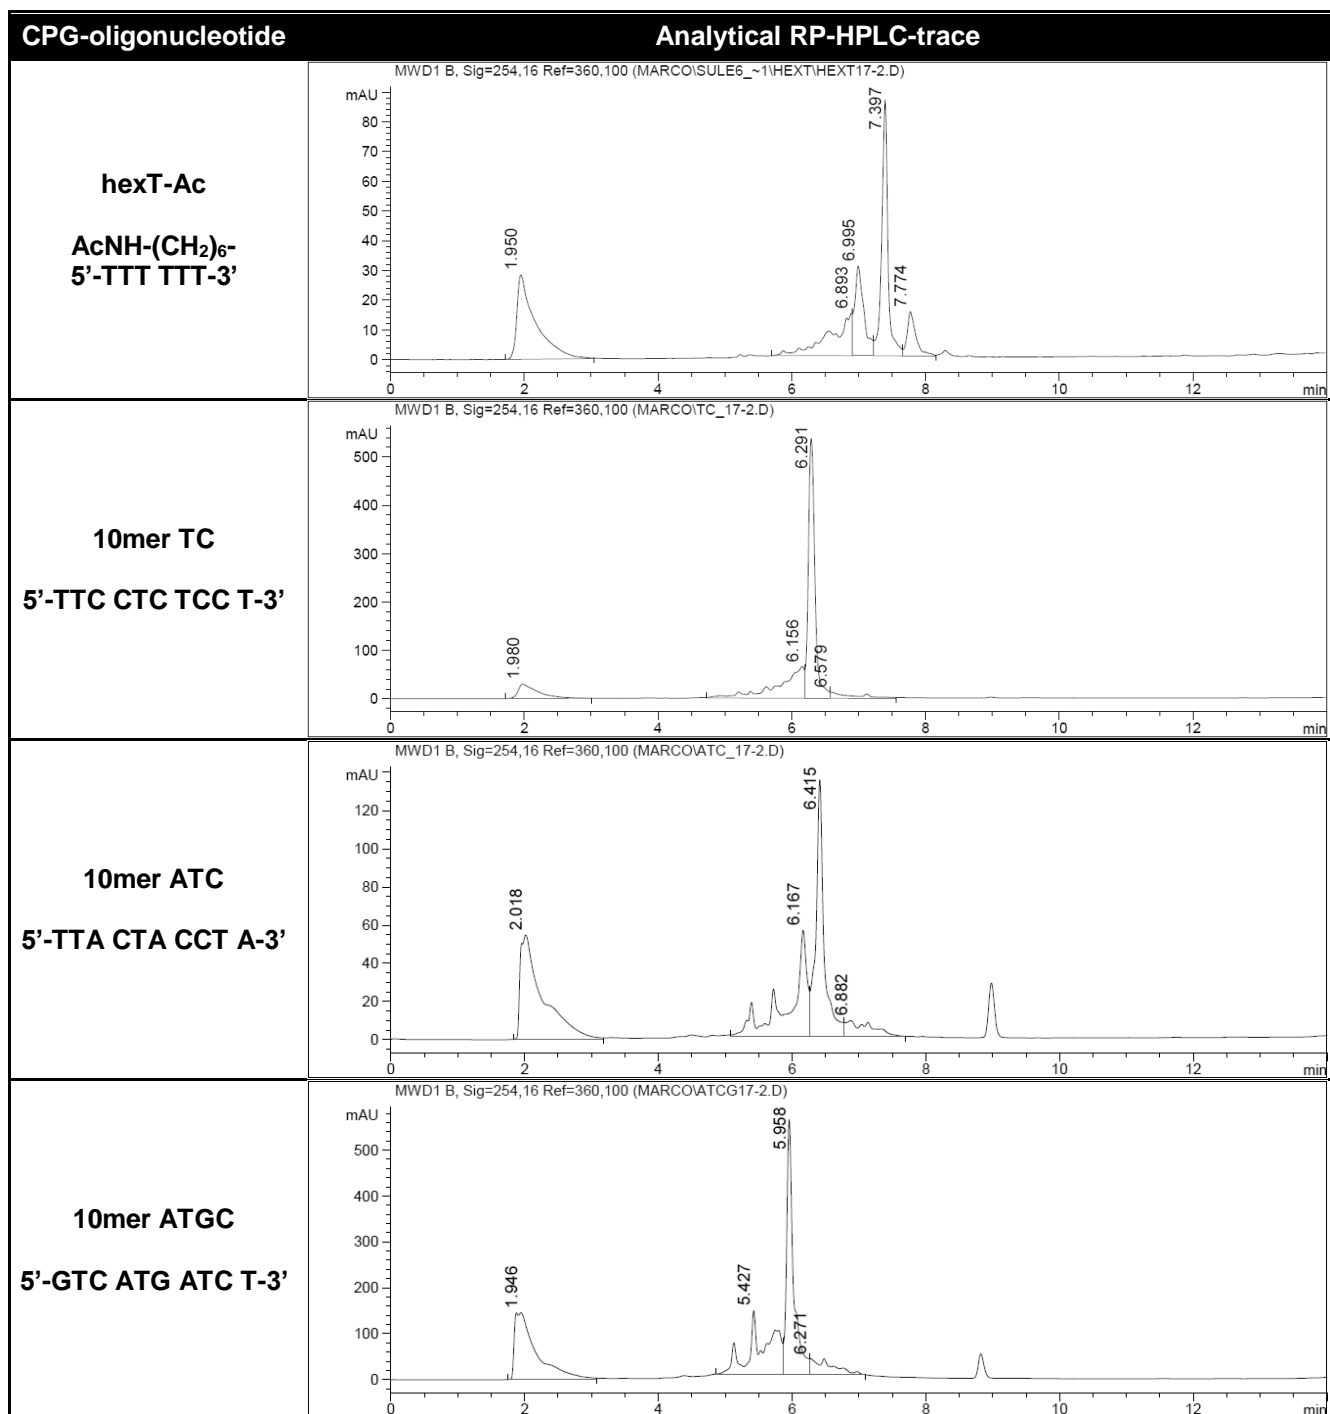

## CPG-oligonucleotide

## MALDI-MS spectra

hexT-Ac

AcNH-(CH<sub>2</sub>)<sub>6</sub>-  
5'-TTT TTT-3'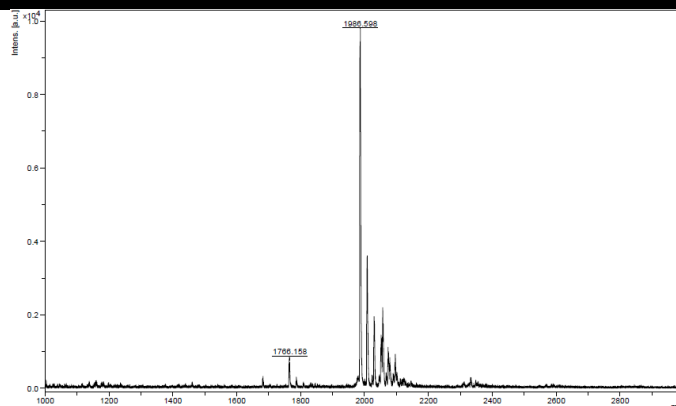mass calc. = 1985.4  
mass found = 1986.6

10mer TC

5'-TTC CTC TCC T-3'

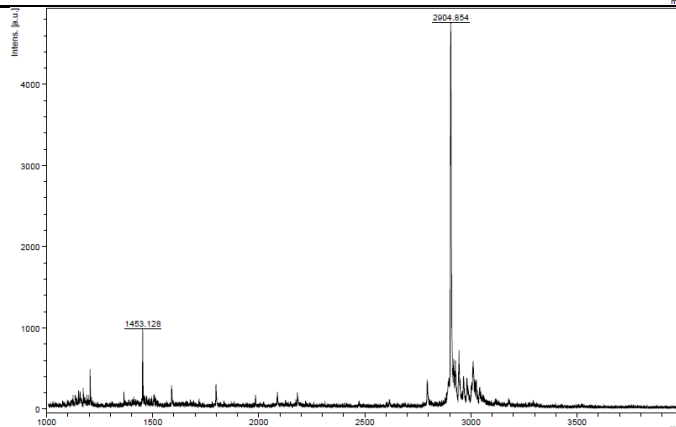mass calc. = 2904.9  
mass found = 2904.9

10mer ATC

5'-TTA CTA CCT A-3'

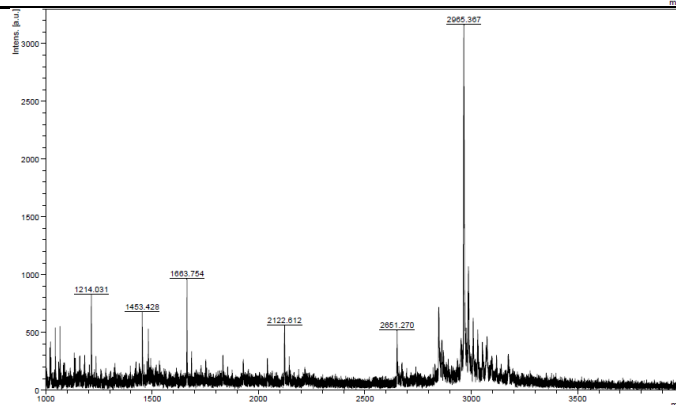mass calc. = 2962.0  
mass found = 2965.4

10mer ATGC

5'-GTC ATG ATC T-3'

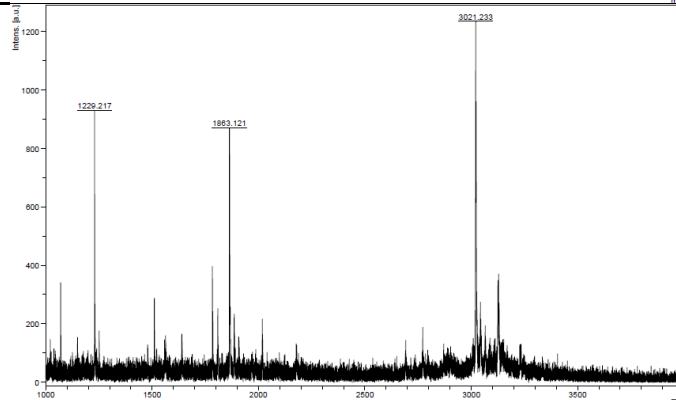mass calc. = 3019.0  
mass found = 3021.2

## CPG-oligonucleotide + Pd(OAc)<sub>2</sub>

According to the representative procedure (RP-03) solid support coupled oligonucleotide (20 nmol) was treated with Pd(OAc)<sub>2</sub> (5 equiv., 0.1  $\mu$ mol) in dry ACN.

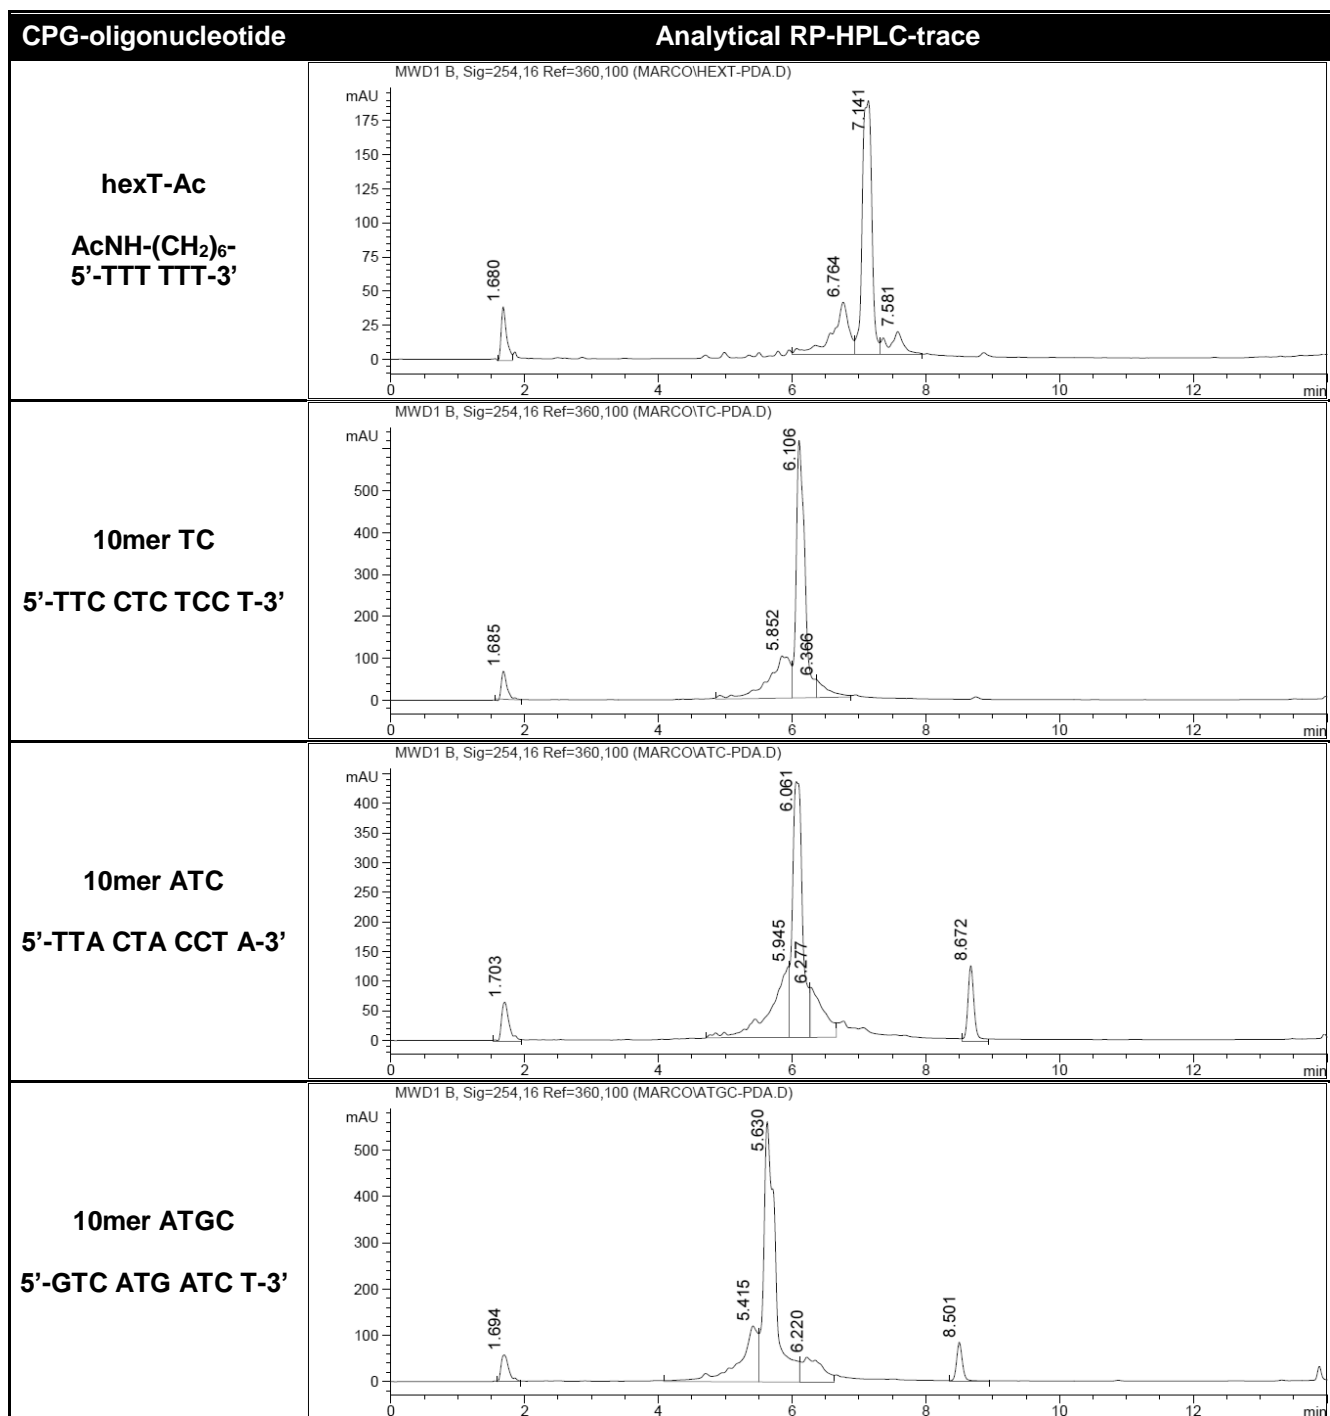

## CPG-oligonucleotide

## MALDI-MS spectra

hexT-Ac

 $\text{AcNH}-(\text{CH}_2)_6-$   
5'-TTT TTT-3'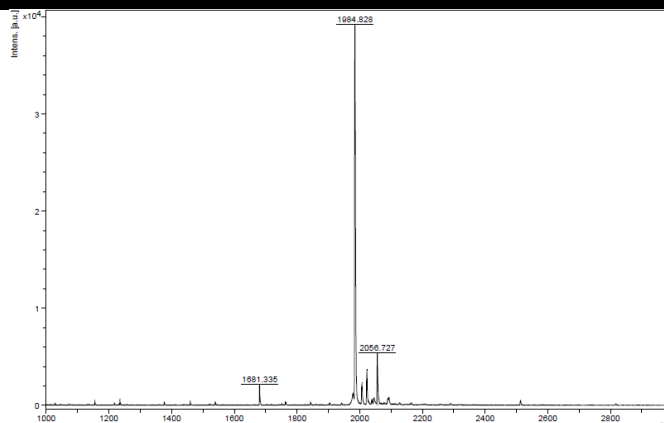mass calc. = 1985.4  
mass found = 1984.8

10mer TC

5'-TTC CTC TCC T-3'

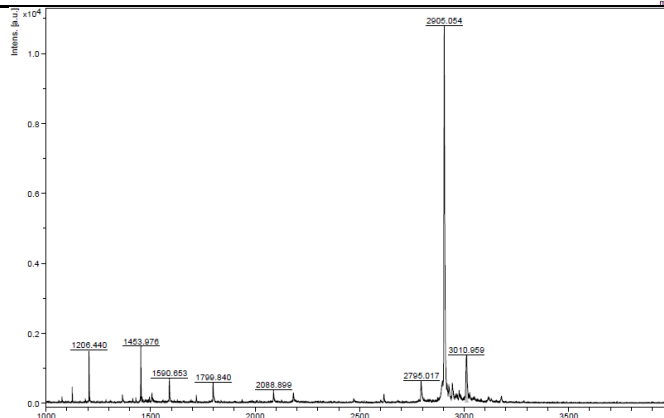mass calc. = 2904.9  
mass found = 2905.1

10mer ATC

5'-TTA CTA CCT A-3'

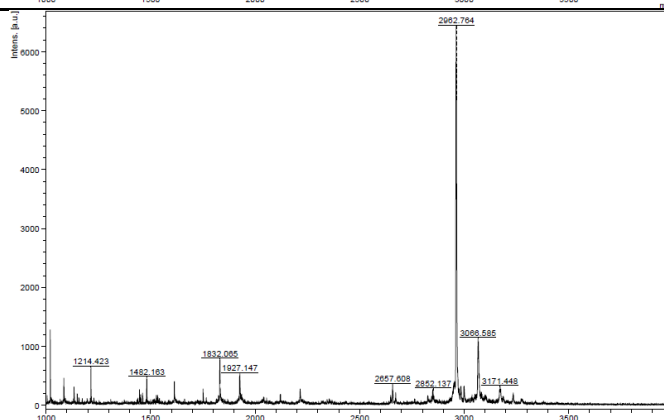mass calc. = 2962.0  
mass found = 2962.8

10mer ATGC

5'-GTC ATG ATC T-3'

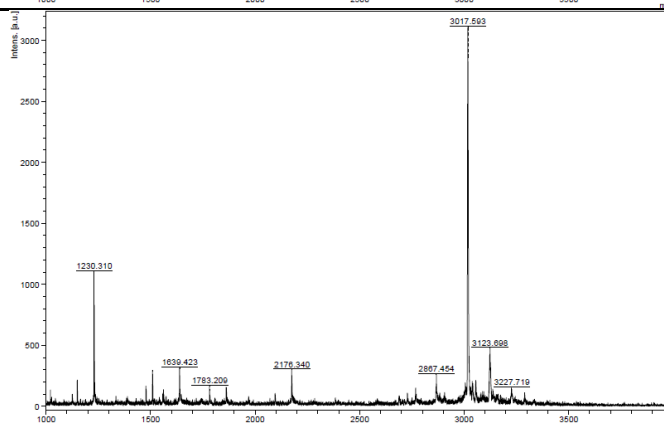mass calc. = 3019.0  
mass found = 3017.6



## CPG-oligonucleotide + Pd(PPh<sub>3</sub>)<sub>4</sub>

According to the representative procedure (RP-03) solid support coupled oligonucleotide (20 nmol) was treated with Pd(PPh<sub>3</sub>)<sub>4</sub> (5 equiv., 0.1 μmol) in dry MeOH.

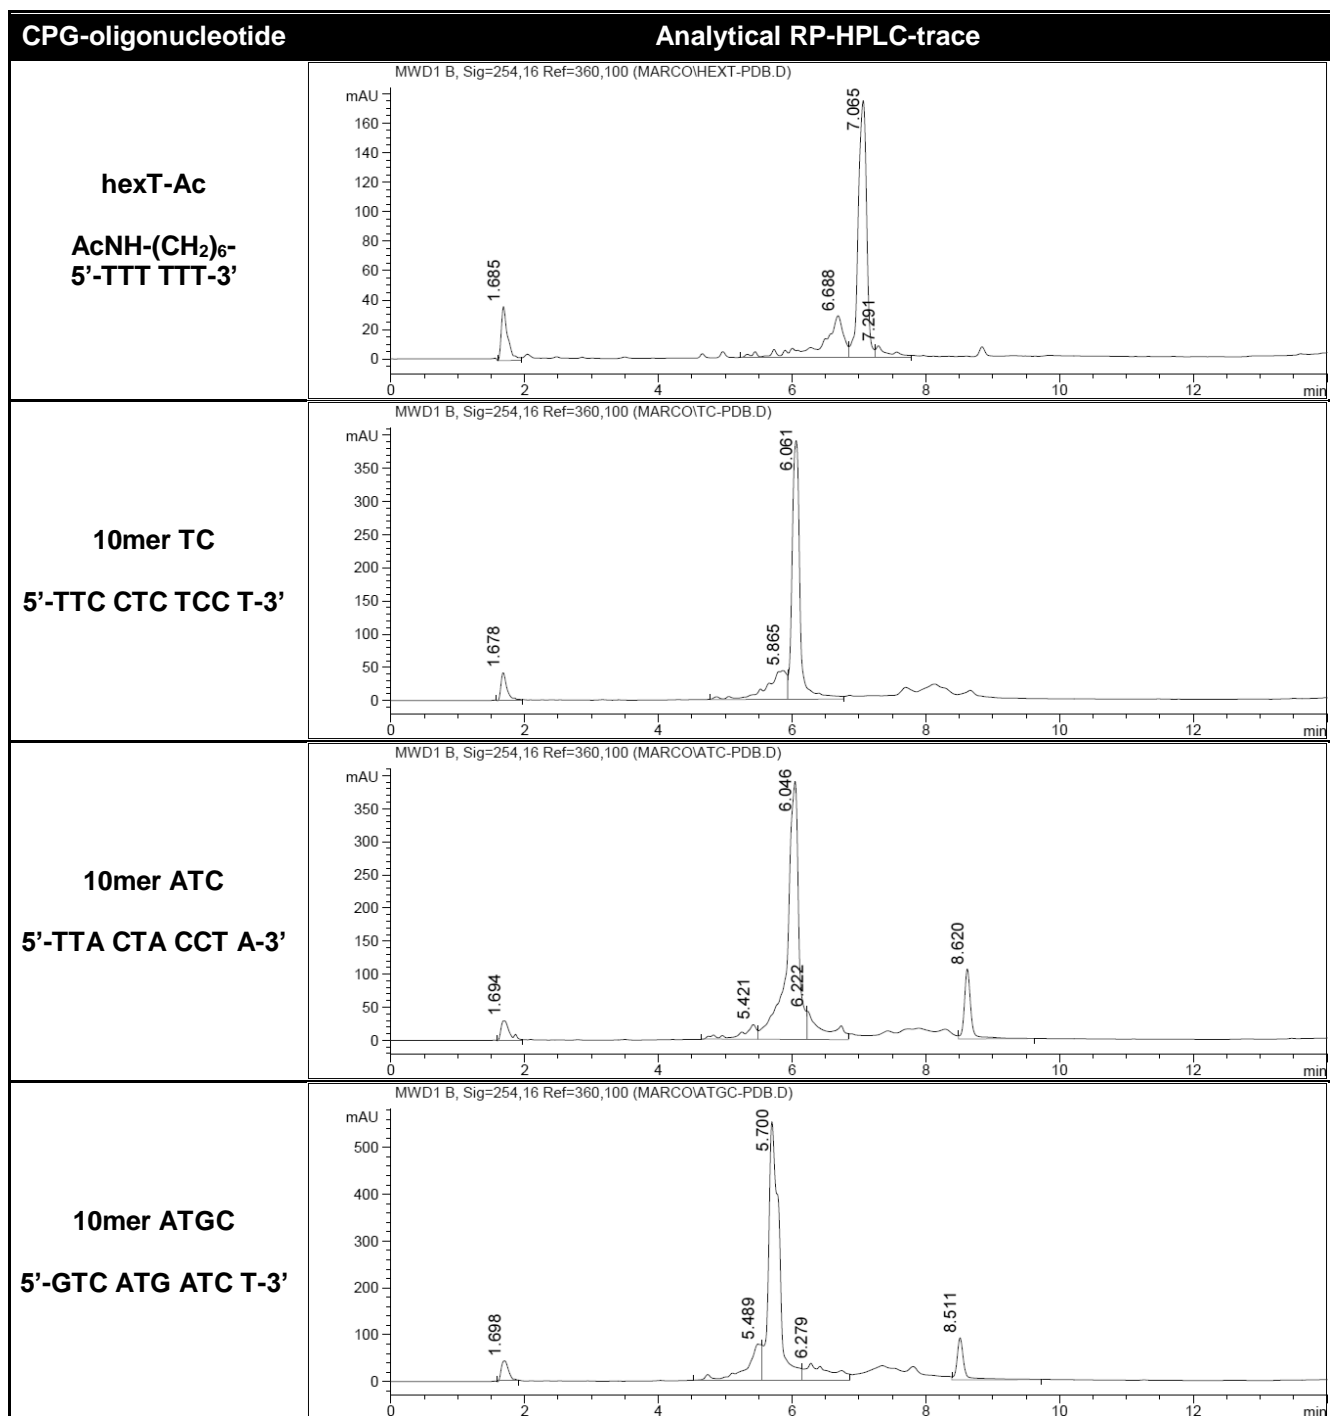

## CPG-oligonucleotide

## MALDI-MS spectra

hexT-Ac

 $\text{AcNH}-(\text{CH}_2)_6-$   
5'-TTT TTT-3'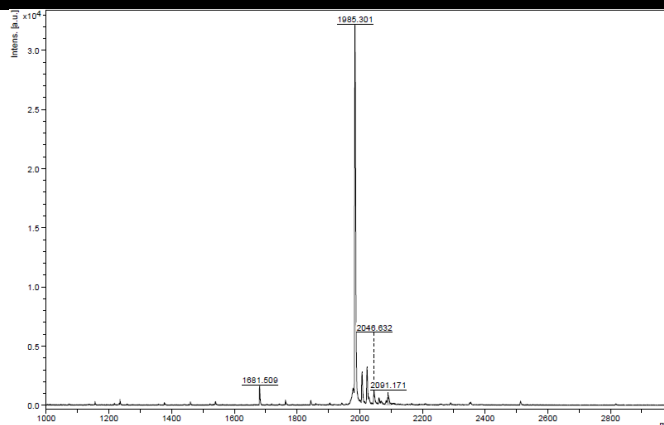mass calc. = 1985.4  
mass found = 1985.3

10mer TC

5'-TTC CTC TCC T-3'

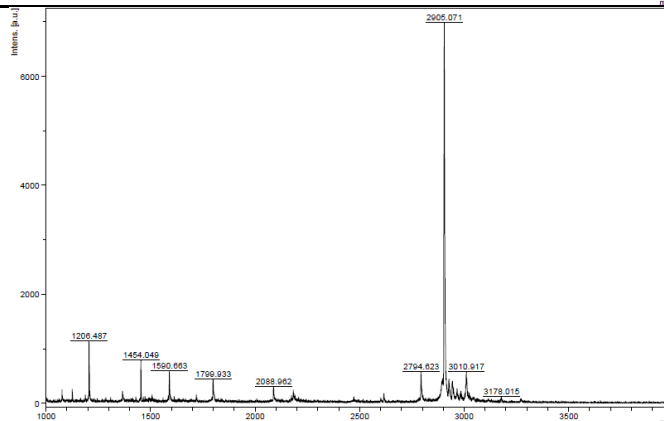mass calc. = 2904.9  
mass found = 2905.1

10mer ATC

5'-TTA CTA CCT A-3'

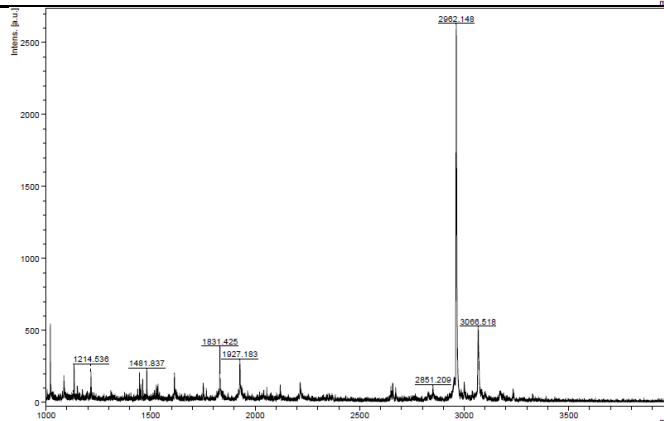mass calc. = 2962.0  
mass found = 2962.1

10mer ATGC

5'-GTC ATG ATC T-3'

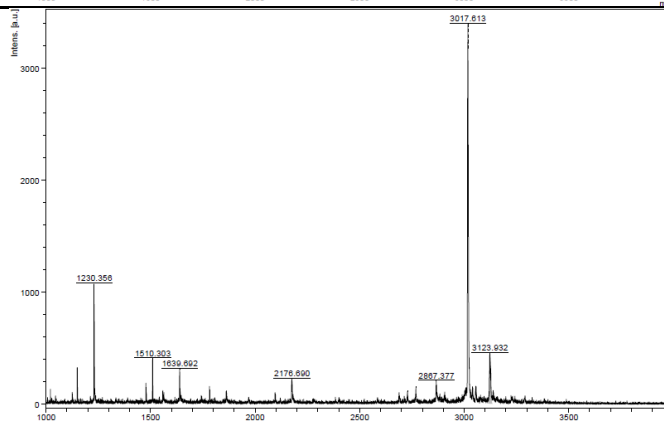mass calc. = 3019.0  
mass found = 3017.6

## CPG-oligonucleotide + [Rh(cod)Cl]<sub>2</sub>

According to the representative procedure (RP-03) solid support coupled oligonucleotide (20 nmol) was treated with [Rh(cod)Cl]<sub>2</sub> (200 equiv., 4 μmol) in dry MeOH.

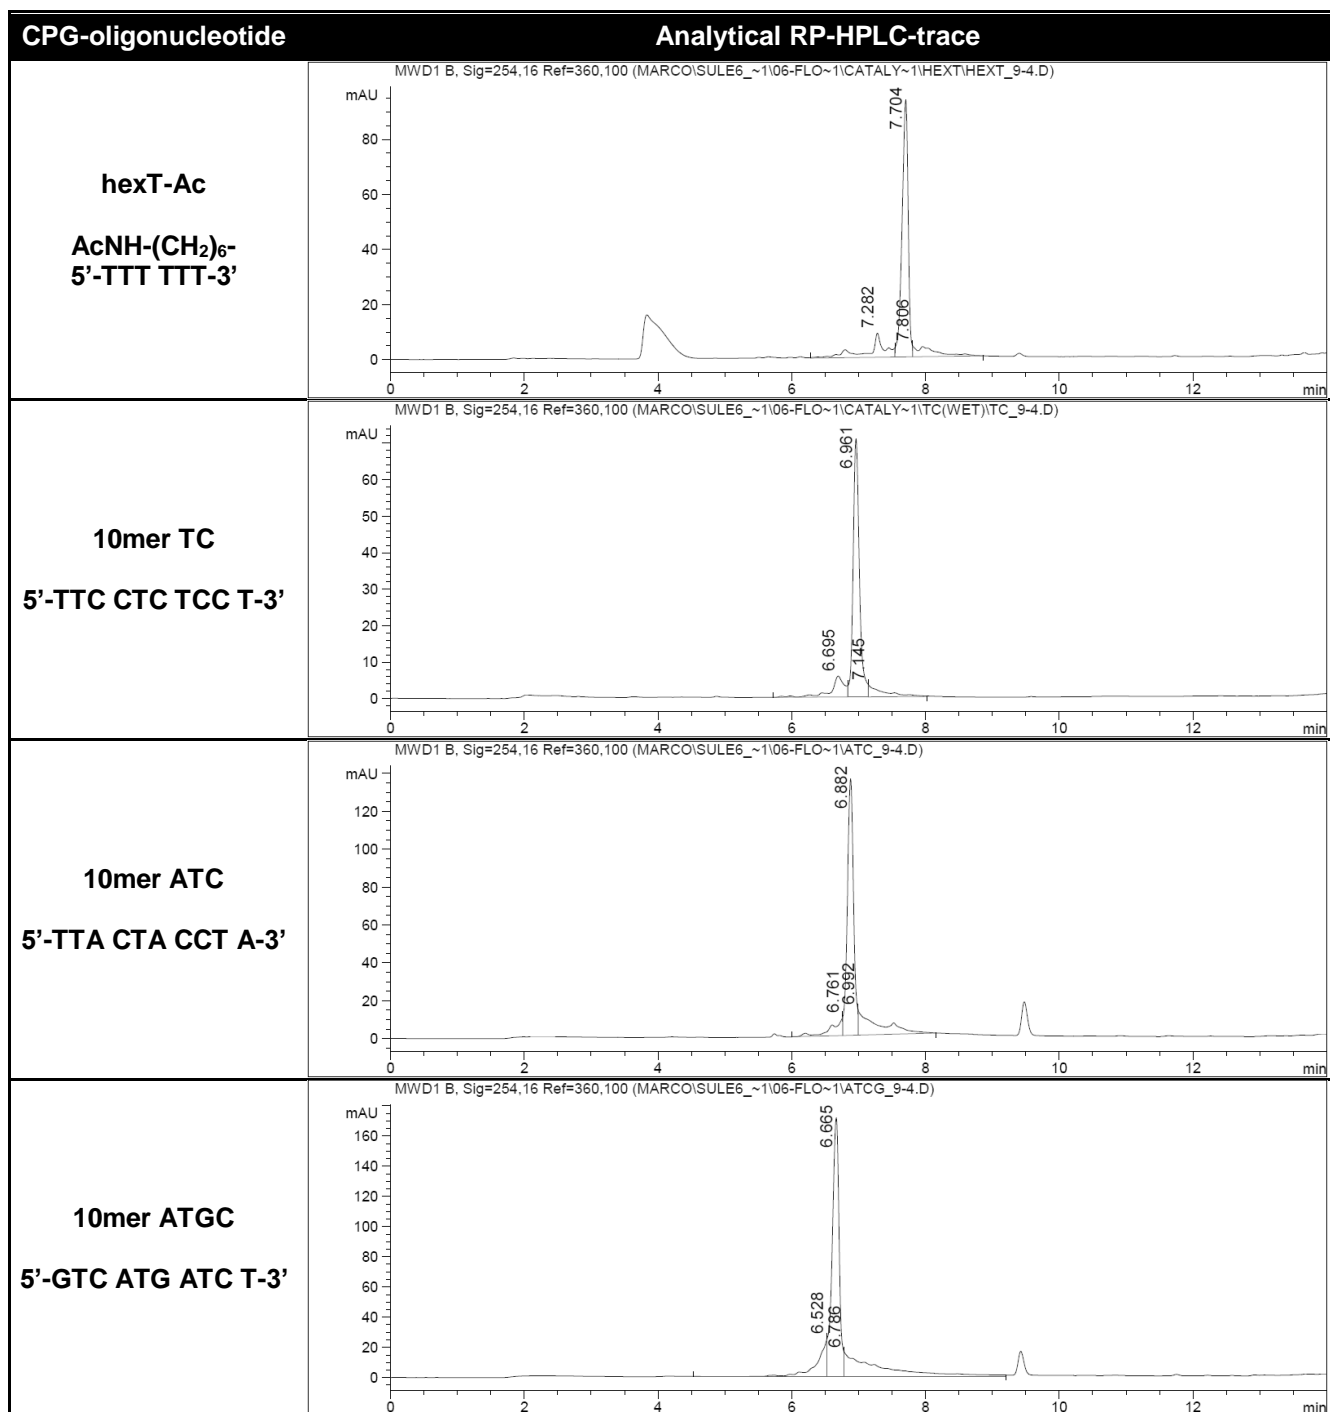

## CPG-oligonucleotide

## MALDI-MS spectra

**hexT-Ac****AcNH-(CH<sub>2</sub>)<sub>6</sub>-  
5'-TTT TTT-3'**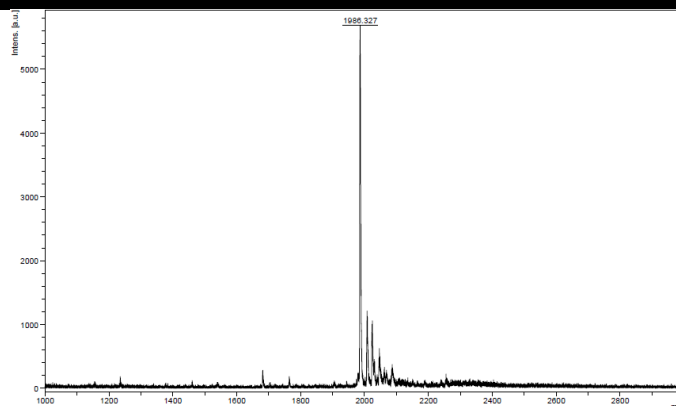mass calc. = 1985.4  
mass found = 1986.3**10mer TC****5'-TTC CTC TCC T-3'**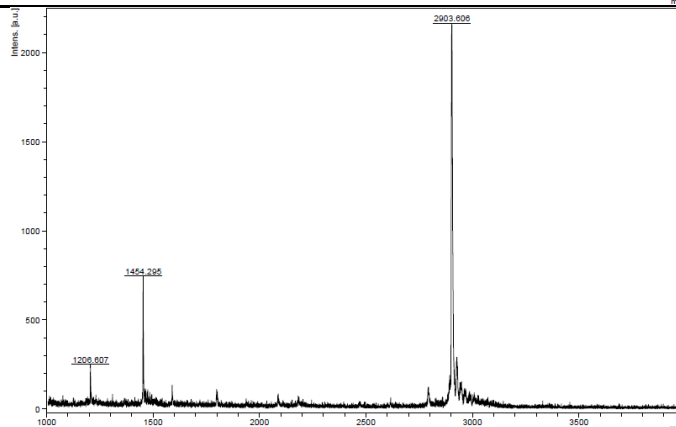mass calc. = 2904.9  
mass found = 2903.6**10mer ATC****5'-TTA CTA CCT A-3'**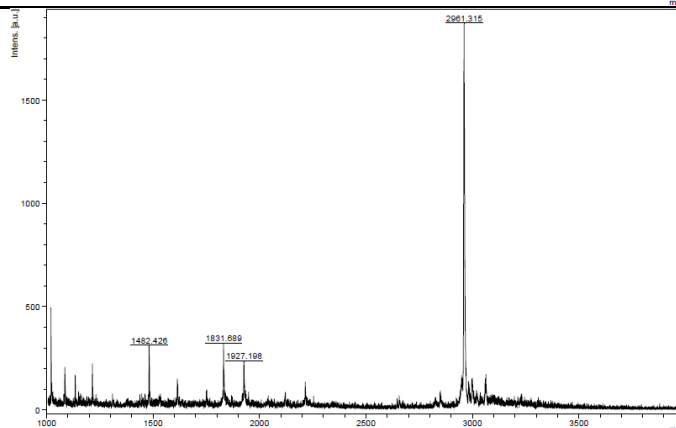mass calc. = 2962.0  
mass found = 2961.3**10mer ATGC****5'-GTC ATG ATC T-3'**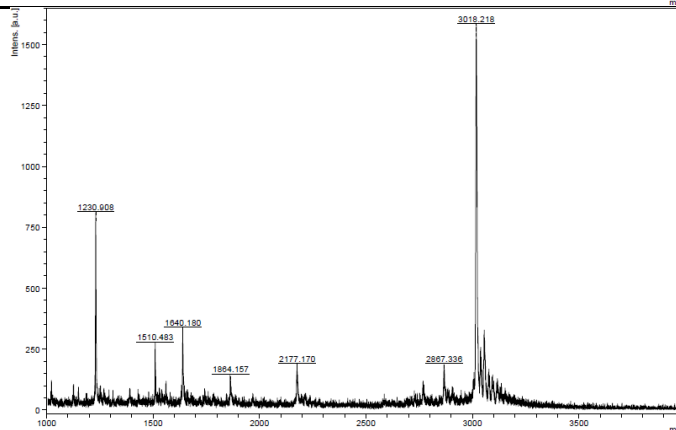mass calc. = 3019.0  
mass found = 3018.2

## CPG-oligonucleotide + RuCl<sub>3</sub>

According to the representative procedure (RP-03) solid support coupled oligonucleotide (20 nmol) was treated with RuCl<sub>3</sub> (200 equiv., 4 µmol) in dry ACN.

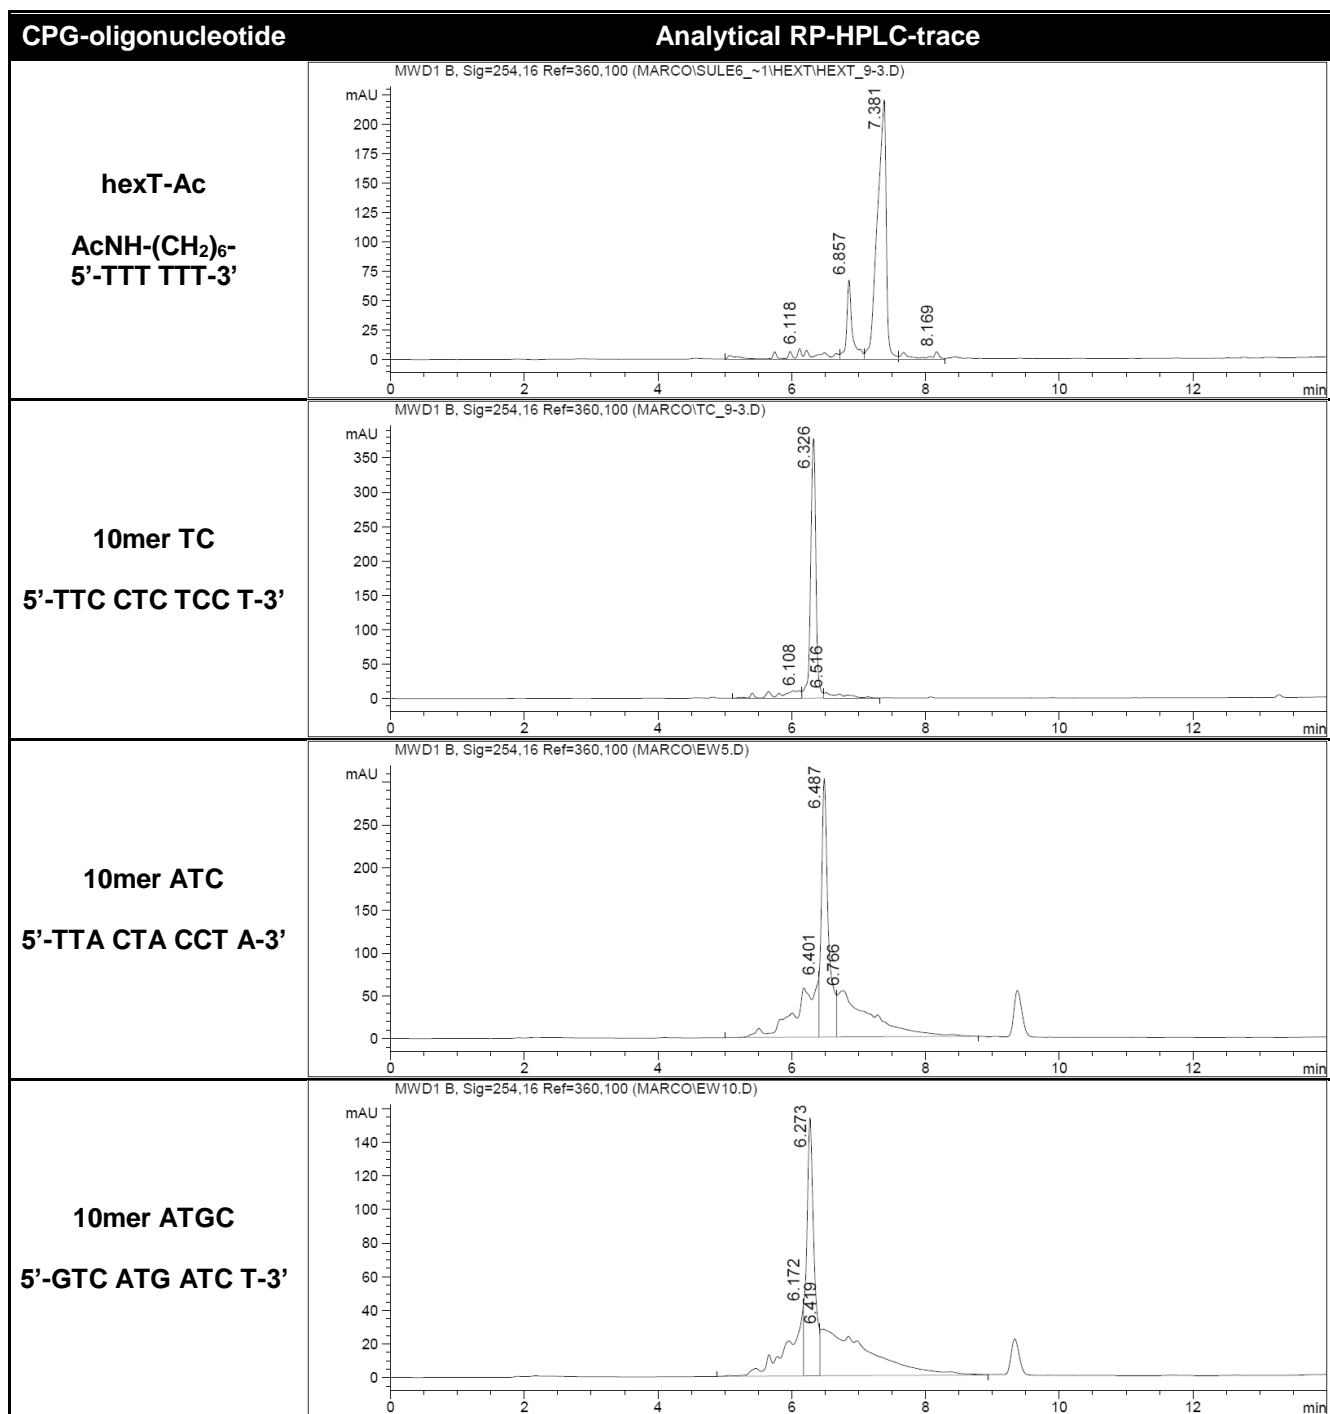

## CPG-oligonucleotide

## MALDI-MS spectra

hexT-Ac

 $\text{AcNH}-(\text{CH}_2)_6-$   
5'-TTT TTT-3'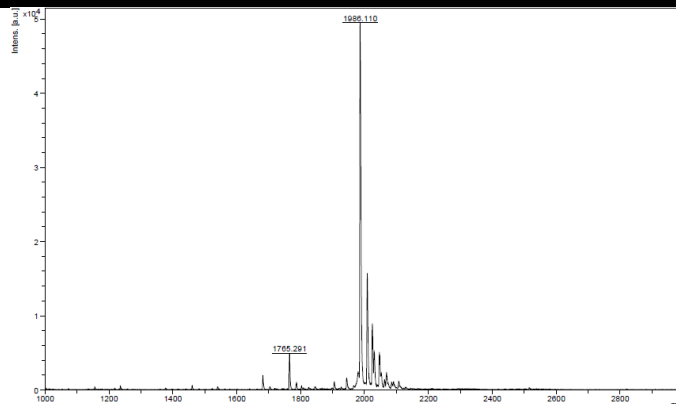mass calc. = 1985.4  
mass found = 1986.1

10mer TC

5'-TTC CTC TCC T-3'

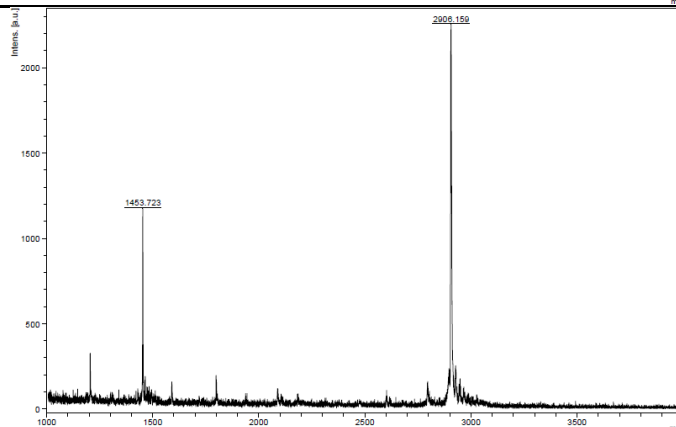mass calc. = 2904.9  
mass found = 2906.2

10mer ATC

5'-TTA CTA CCT A-3'

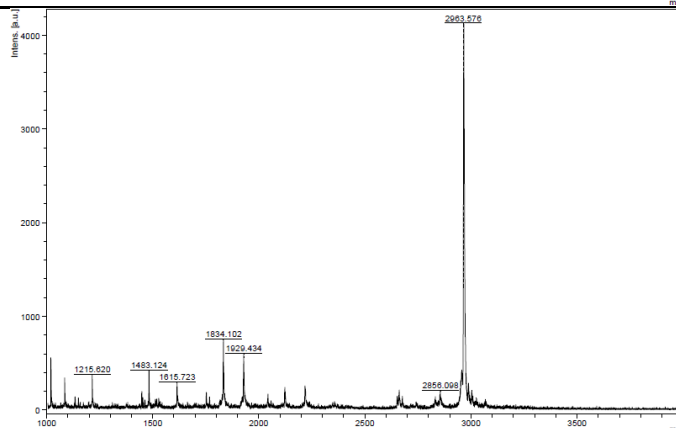mass calc. = 2962.0  
mass found = 2963.6

10mer ATGC

5'-GTC ATG ATC T-3'

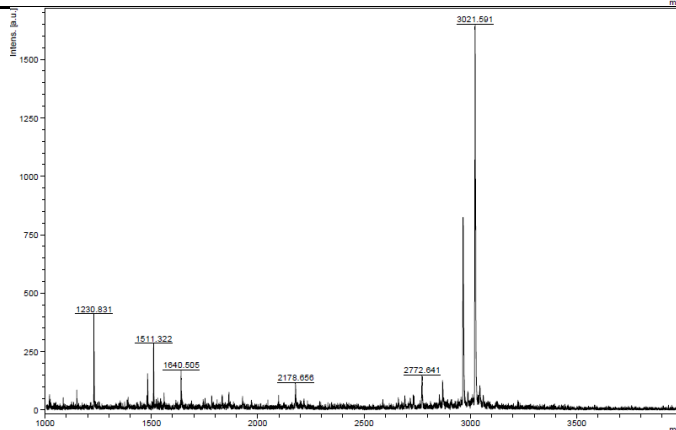mass calc. = 3019.0  
mass found = 3021.6

**CPG-oligonucleotide + [Ru(*p*-cymene)Cl<sub>2</sub>]<sub>2</sub>**

According to the representative procedure (RP-03) solid support coupled oligonucleotide (20 nmol) was treated with [Ru(*p*-cymene)Cl<sub>2</sub>]<sub>2</sub> (200 equiv., 4 μmol) in dry CH<sub>2</sub>Cl<sub>2</sub>.

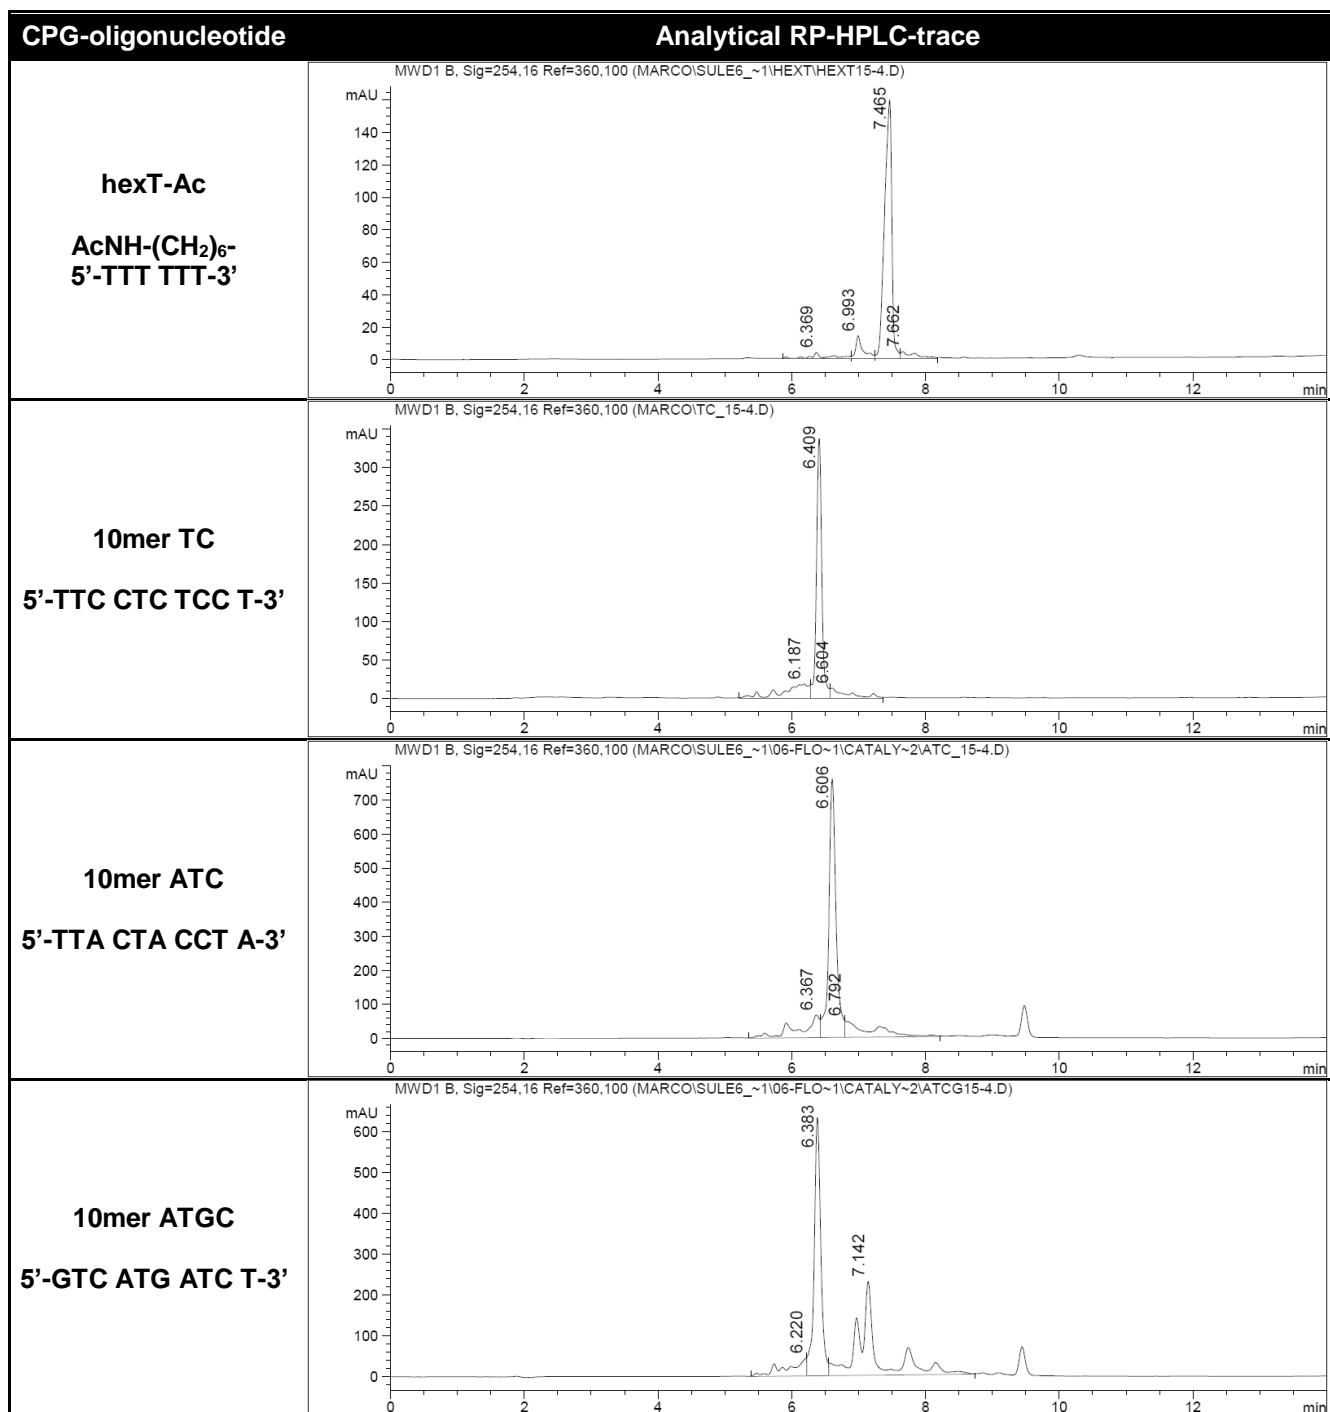

## CPG-oligonucleotide

## MALDI-MS spectra

hexT-Ac

 $\text{AcNH}-(\text{CH}_2)_6-$   
5'-TTT TTT-3'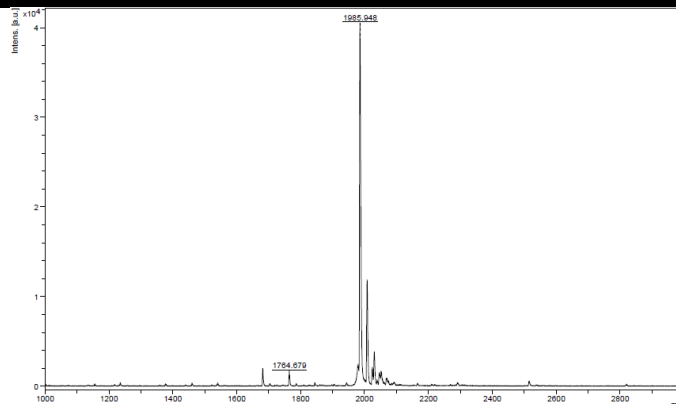mass calc. = 1985.4  
mass found = 1986.0

10mer TC

5'-TTC CTC TCC T-3'

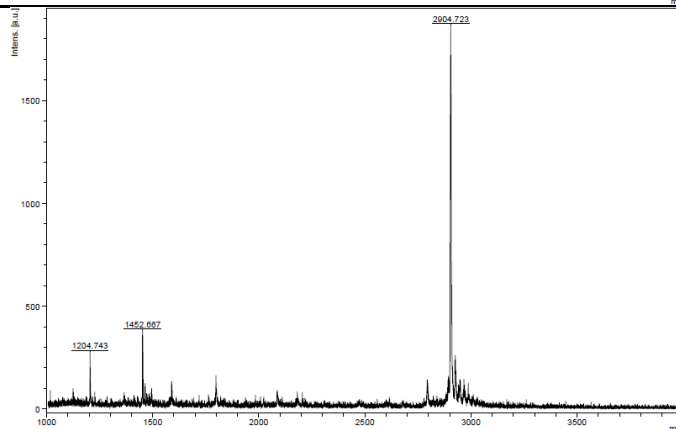mass calc. = 2904.9  
mass found = 2904.7

10mer ATC

5'-TTA CTA CCT A-3'

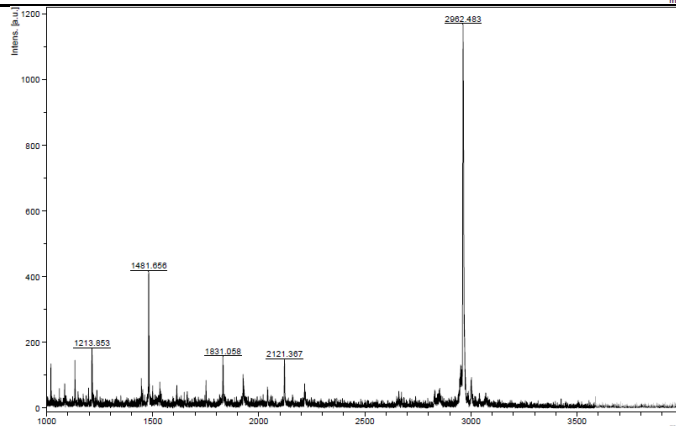mass calc. = 2962.0  
mass found = 2962.5

10mer ATGC

5'-GTC ATG ATC T-3'

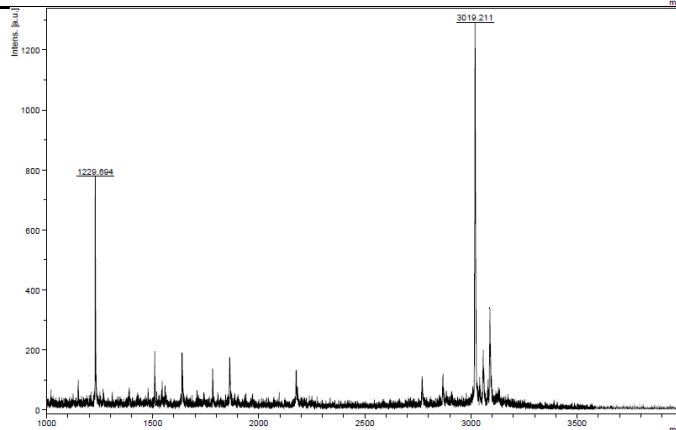mass calc. = 3019.0  
mass found = 3019.2



## CPG-oligonucleotide + Ru(Me-allyl)<sub>2</sub>(cod)

According to the representative procedure (RP-03) solid support coupled oligonucleotide (20 nmol) was treated with Ru(Me-allyl)<sub>2</sub>(cod) (200 equiv., 4 μmol) in dry CH<sub>2</sub>Cl<sub>2</sub>.

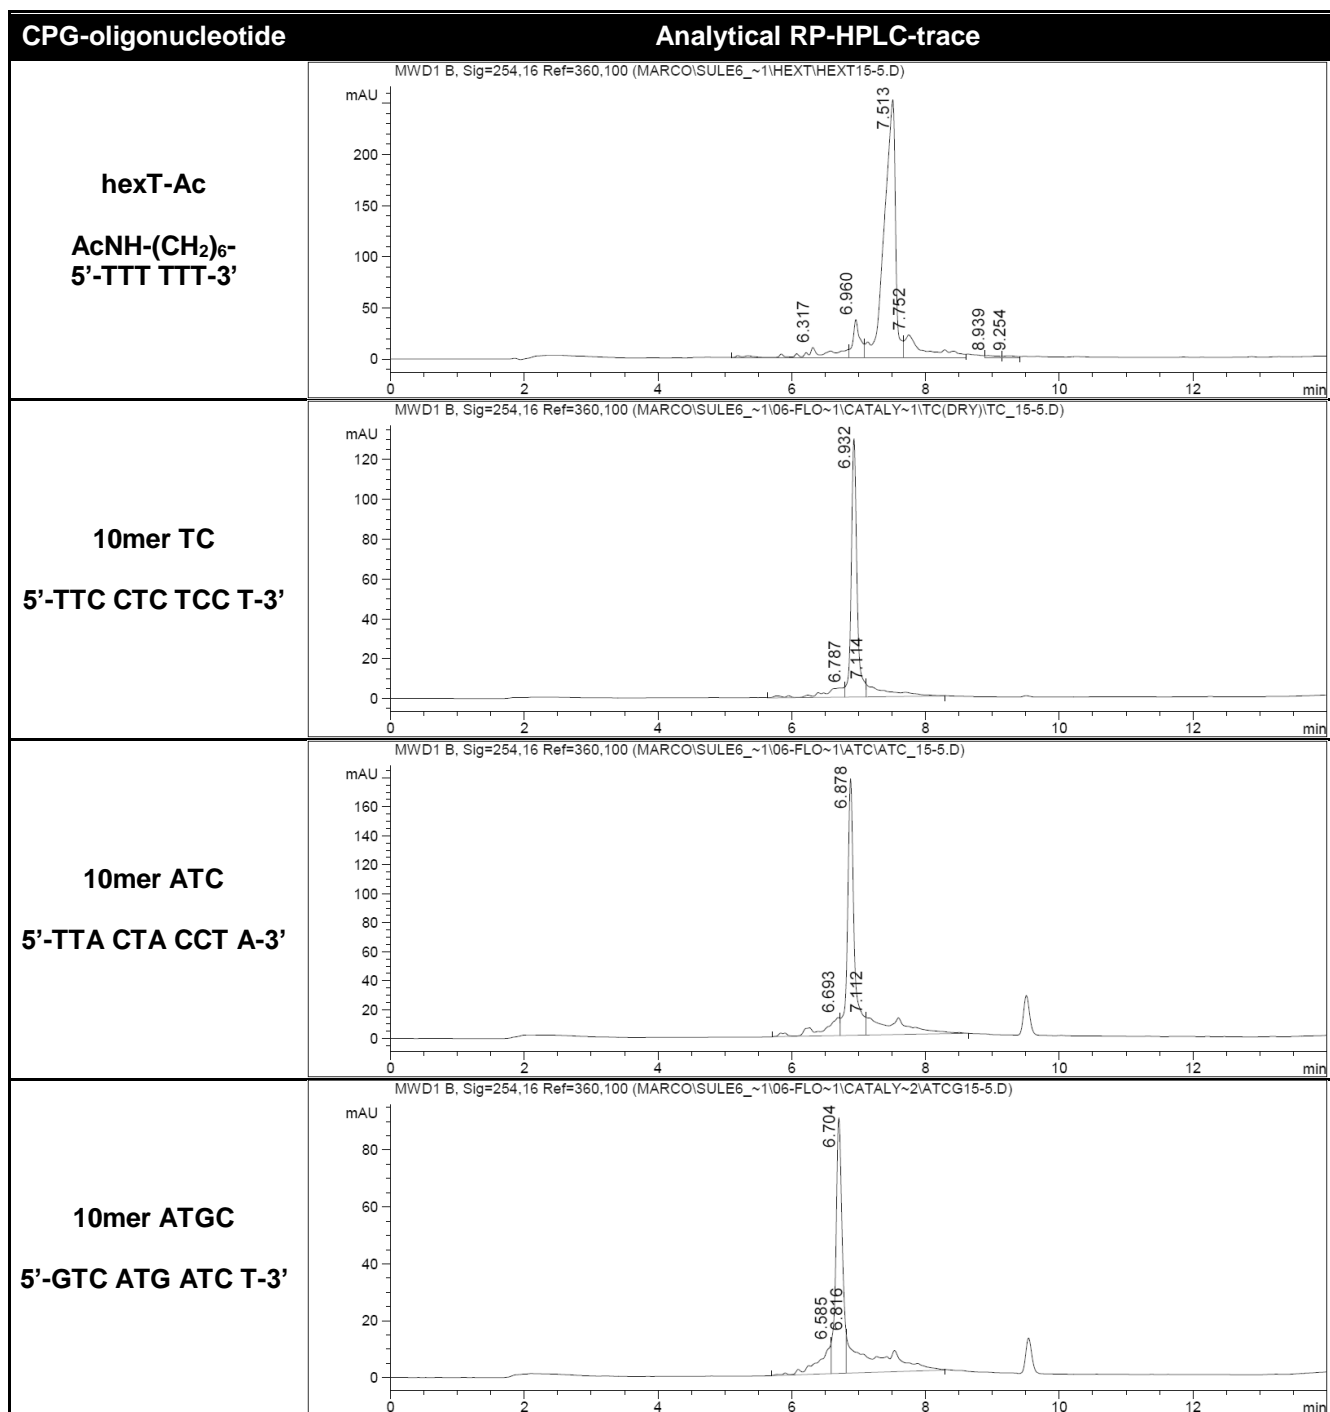

## CPG-oligonucleotide

## MALDI-MS spectra

hexT-Ac

 $\text{AcNH}-(\text{CH}_2)_6-$   
5'-TTT TTT-3'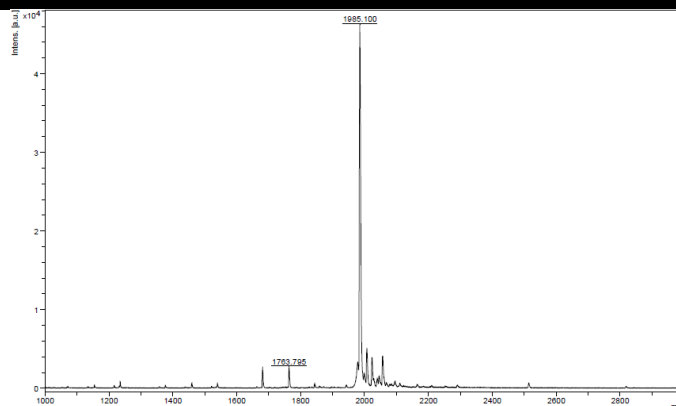mass calc. = 1985.4  
mass found = 1985.1

10mer TC

5'-TTC CTC TCC T-3'

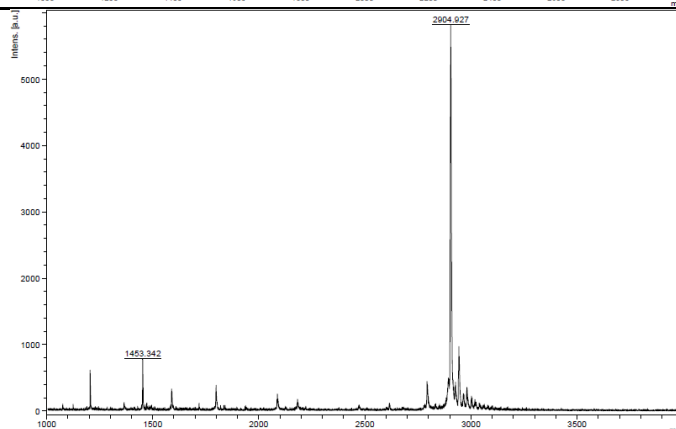mass calc. = 2904.9  
mass found = 2904.9

10mer ATC

5'-TTA CTA CCT A-3'

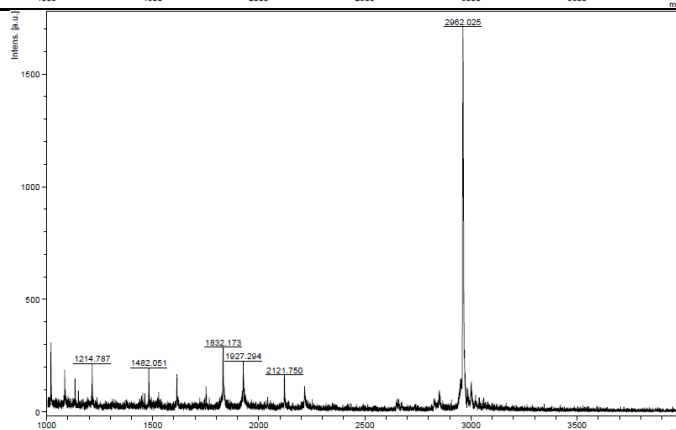mass calc. = 2962.0  
mass found = 2962.0

10mer ATGC

5'-GTC ATG ATC T-3'

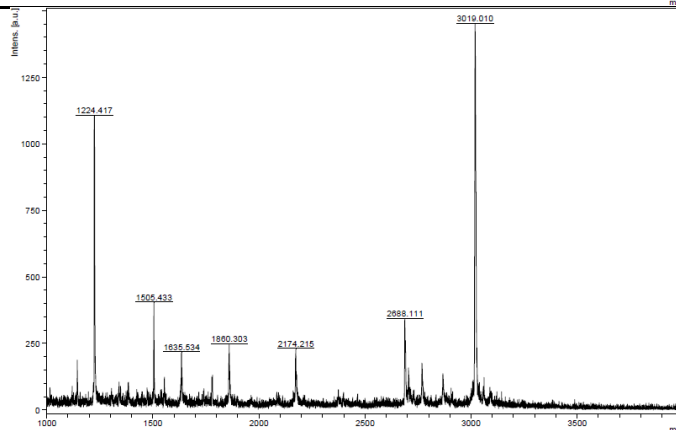mass calc. = 3019.0  
mass found = 3019.0

## CPG-oligonucleotide + Grubbs 1<sup>st</sup> Gen.

According to the representative procedure (RP-03) solid support coupled oligonucleotide (20 nmol) was treated with Grubbs 1<sup>st</sup> Gen. (200 equiv., 4  $\mu$ mol) in dry CH<sub>2</sub>Cl<sub>2</sub>.

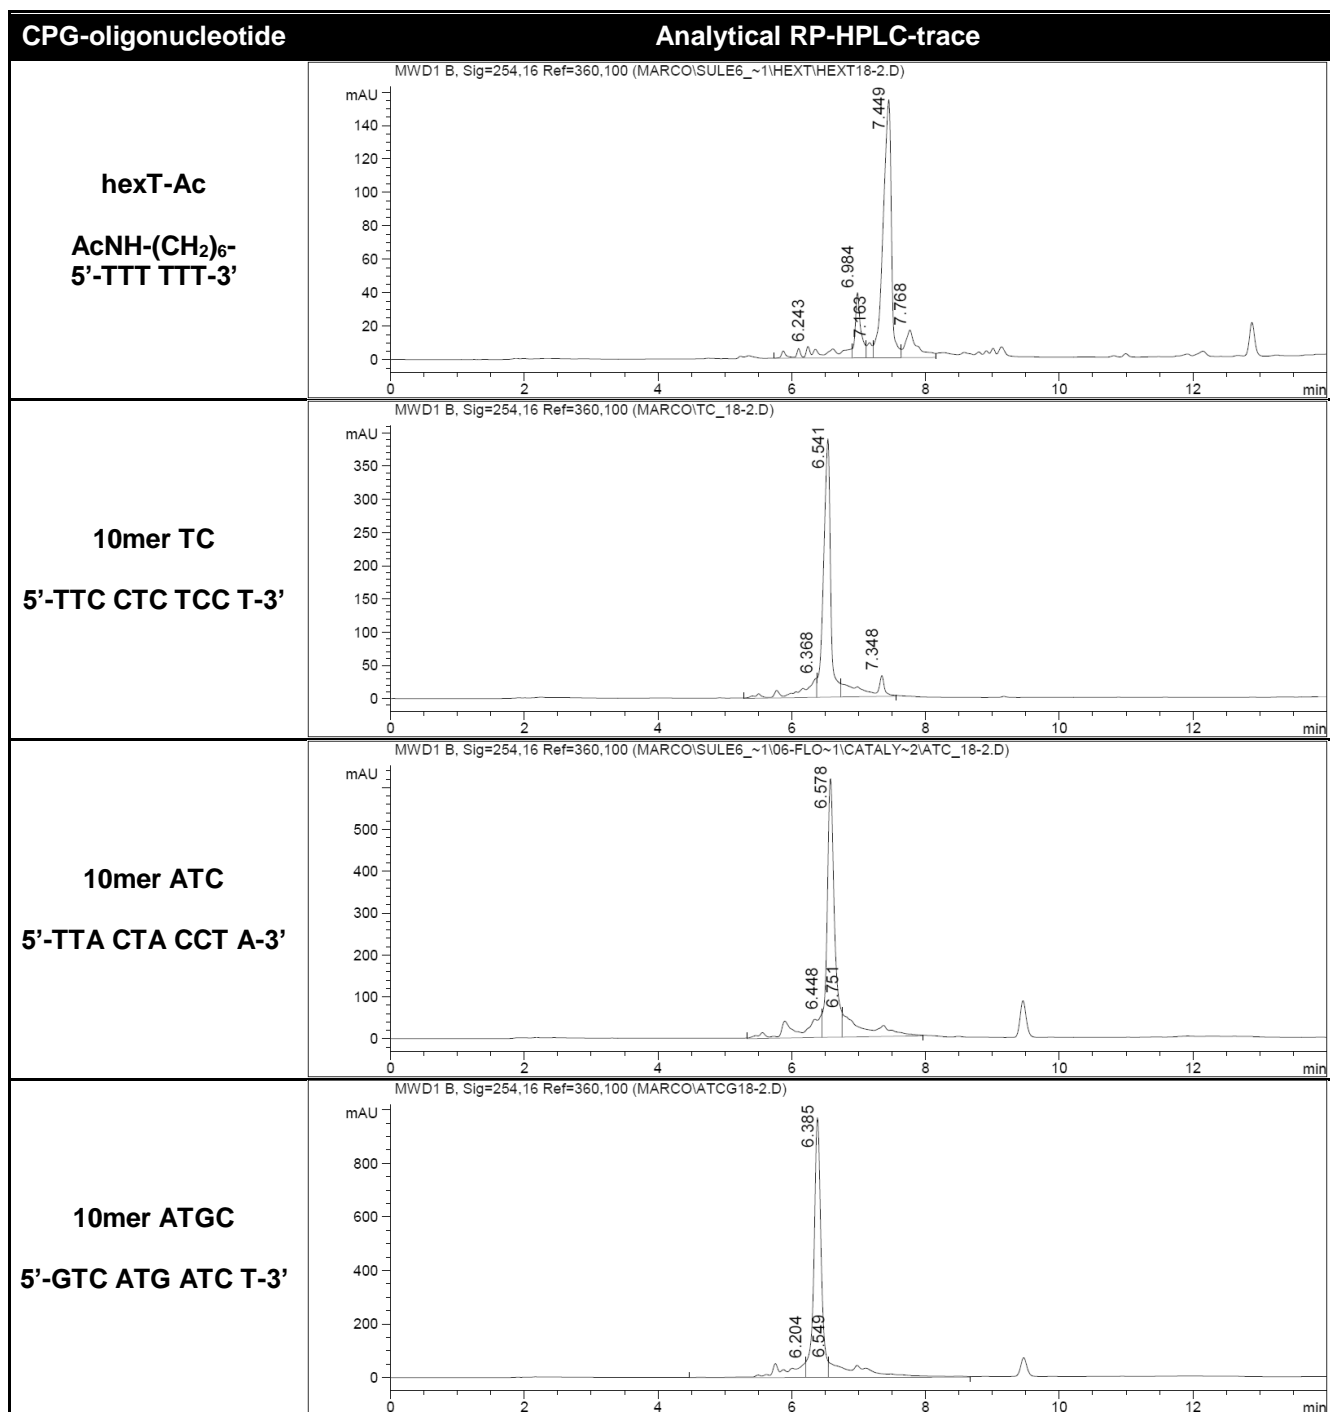

## CPG-oligonucleotide

## MALDI-MS spectra

**hexT-Ac****AcNH-(CH<sub>2</sub>)<sub>6</sub>-  
5'-TTT TTT-3'**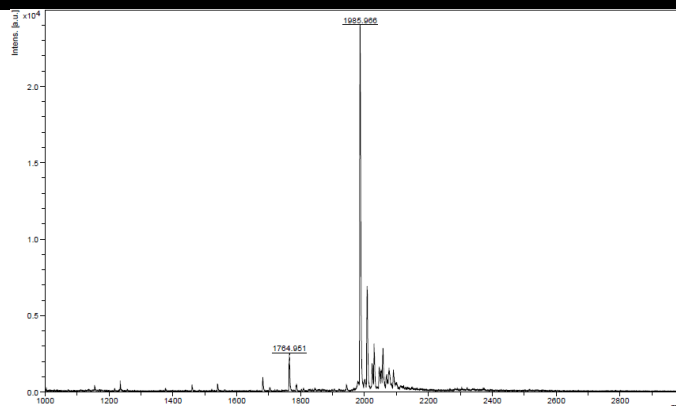mass calc. = 1985.4  
mass found = 1986.0**10mer TC****5'-TTC CTC TCC T-3'**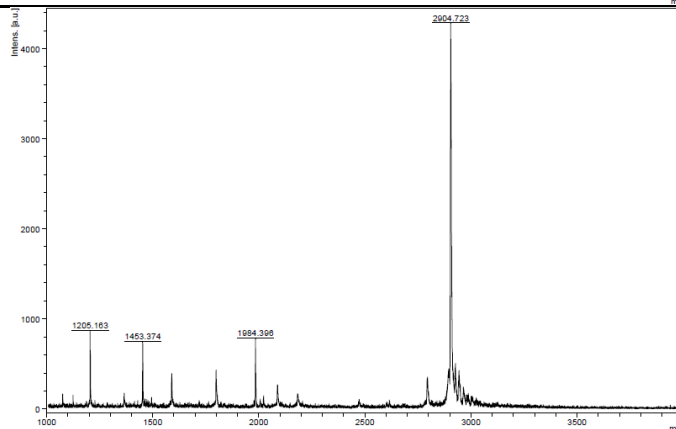mass calc. = 2904.9  
mass found = 2904.7**10mer ATC****5'-TTA CTA CCT A-3'**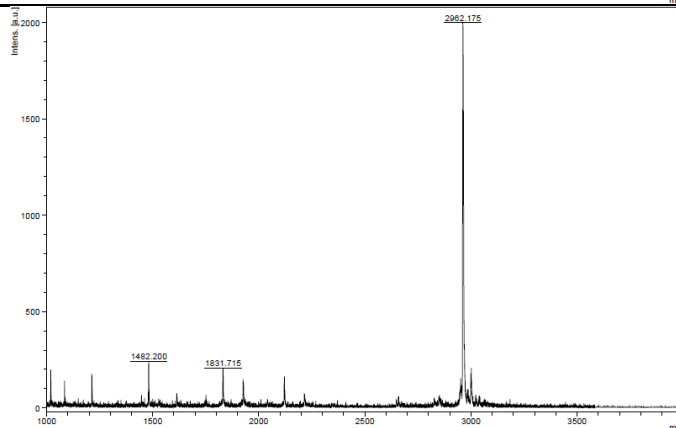mass calc. = 2962.0  
mass found = 2962.2**10mer ATGC****5'-GTC ATG ATC T-3'**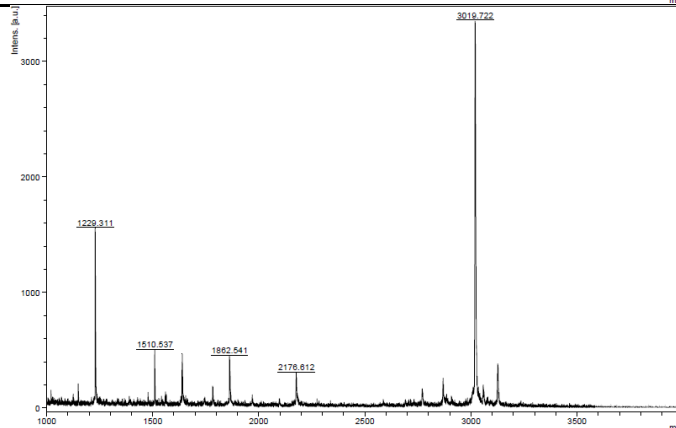mass calc. = 3019.0  
mass found = 3019.7

## CPG-oligonucleotide + SbCl<sub>3</sub>

According to the representative procedure (RP-03) solid support coupled oligonucleotide (20 nmol) was treated with SbCl<sub>3</sub> (200 equiv., 4 µmol) in dry ACN.

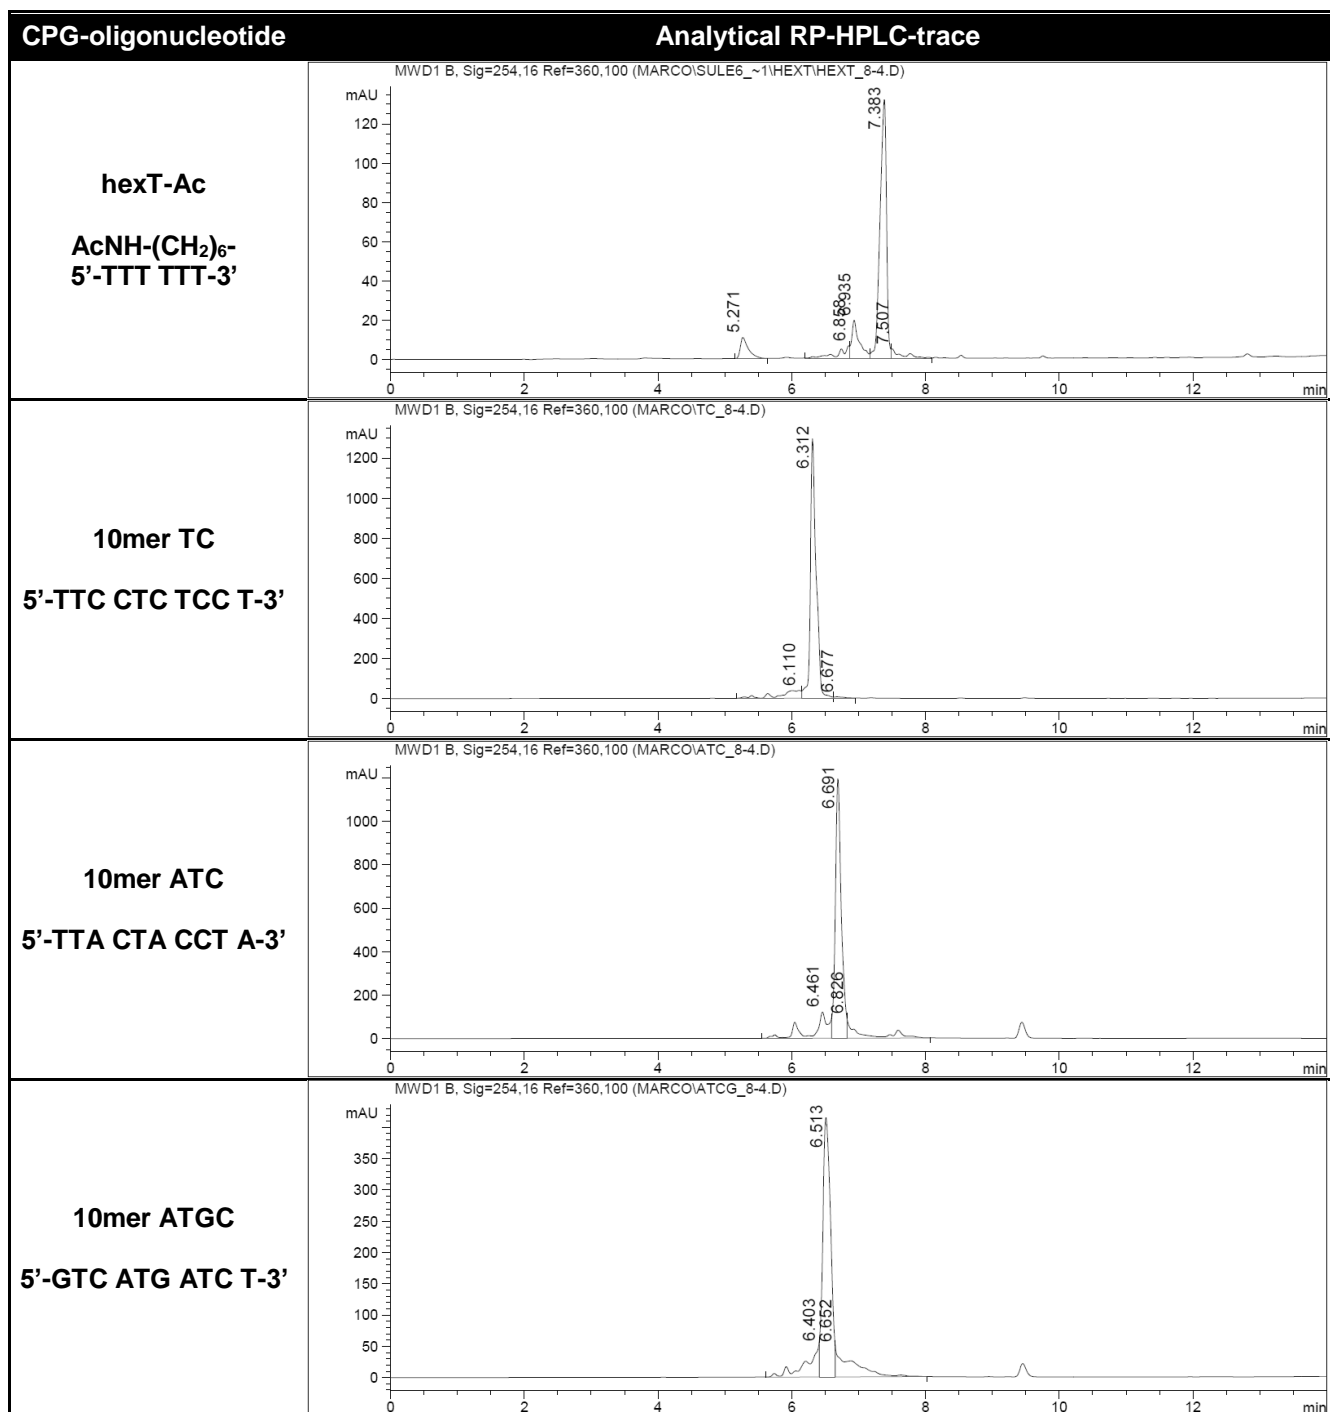

## CPG-oligonucleotide

## MALDI-MS spectra

**hexT-Ac****AcNH-(CH<sub>2</sub>)<sub>6</sub>-  
5'-TTT TTT-3'**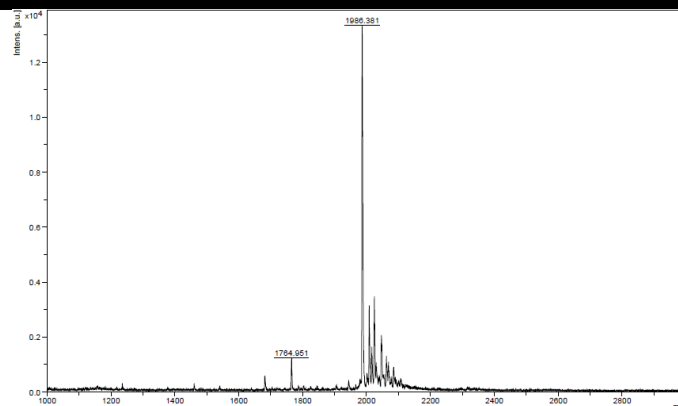mass calc. = 1985.4  
mass found = 1986.4**10mer TC****5'-TTC CTC TCC T-3'**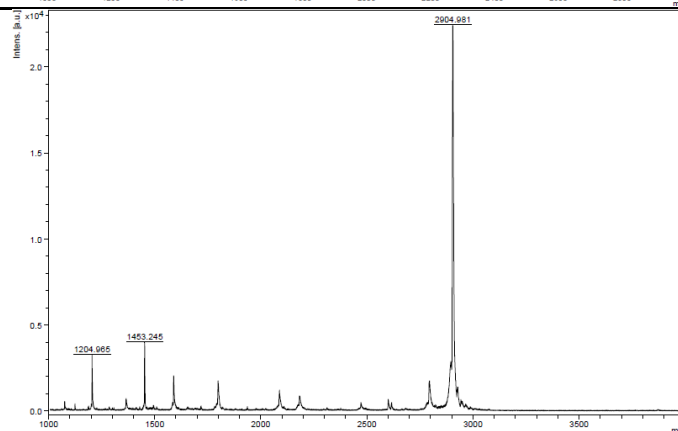mass calc. = 2904.9  
mass found = 2905.0**10mer ATC****5'-TTA CTA CCT A-3'**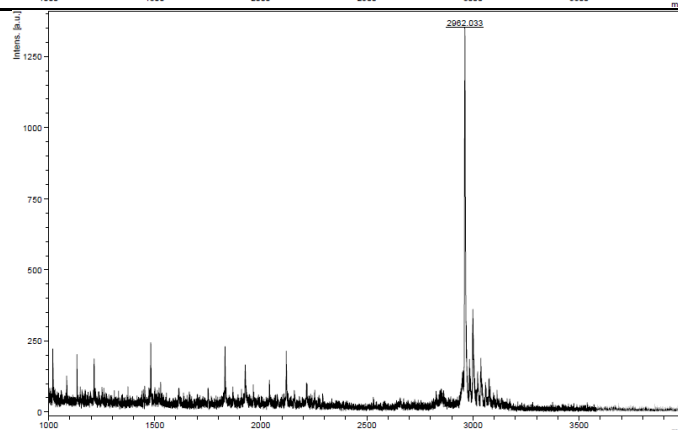mass calc. = 2962.0  
mass found = 2962.0**10mer ATGC****5'-GTC ATG ATC T-3'**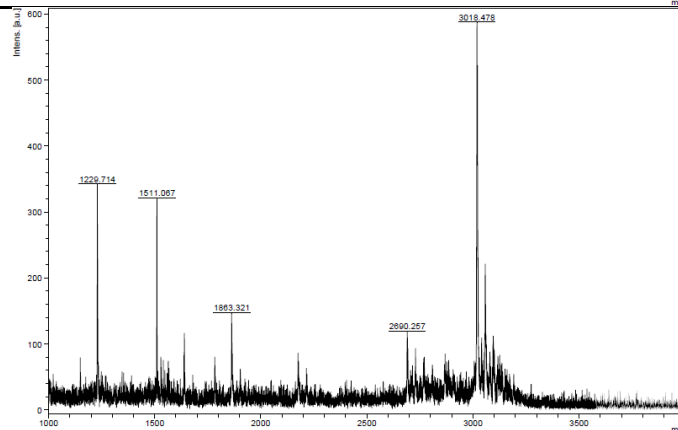mass calc. = 3019.0  
mass found = 3018.5

## CPG-oligonucleotide + Sc(OTf)<sub>3</sub>

According to the representative procedure (RP-03) solid support coupled oligonucleotide (20 nmol) was treated with Sc(OTf)<sub>3</sub> (200 equiv., 4 μmol) in dry ACN.

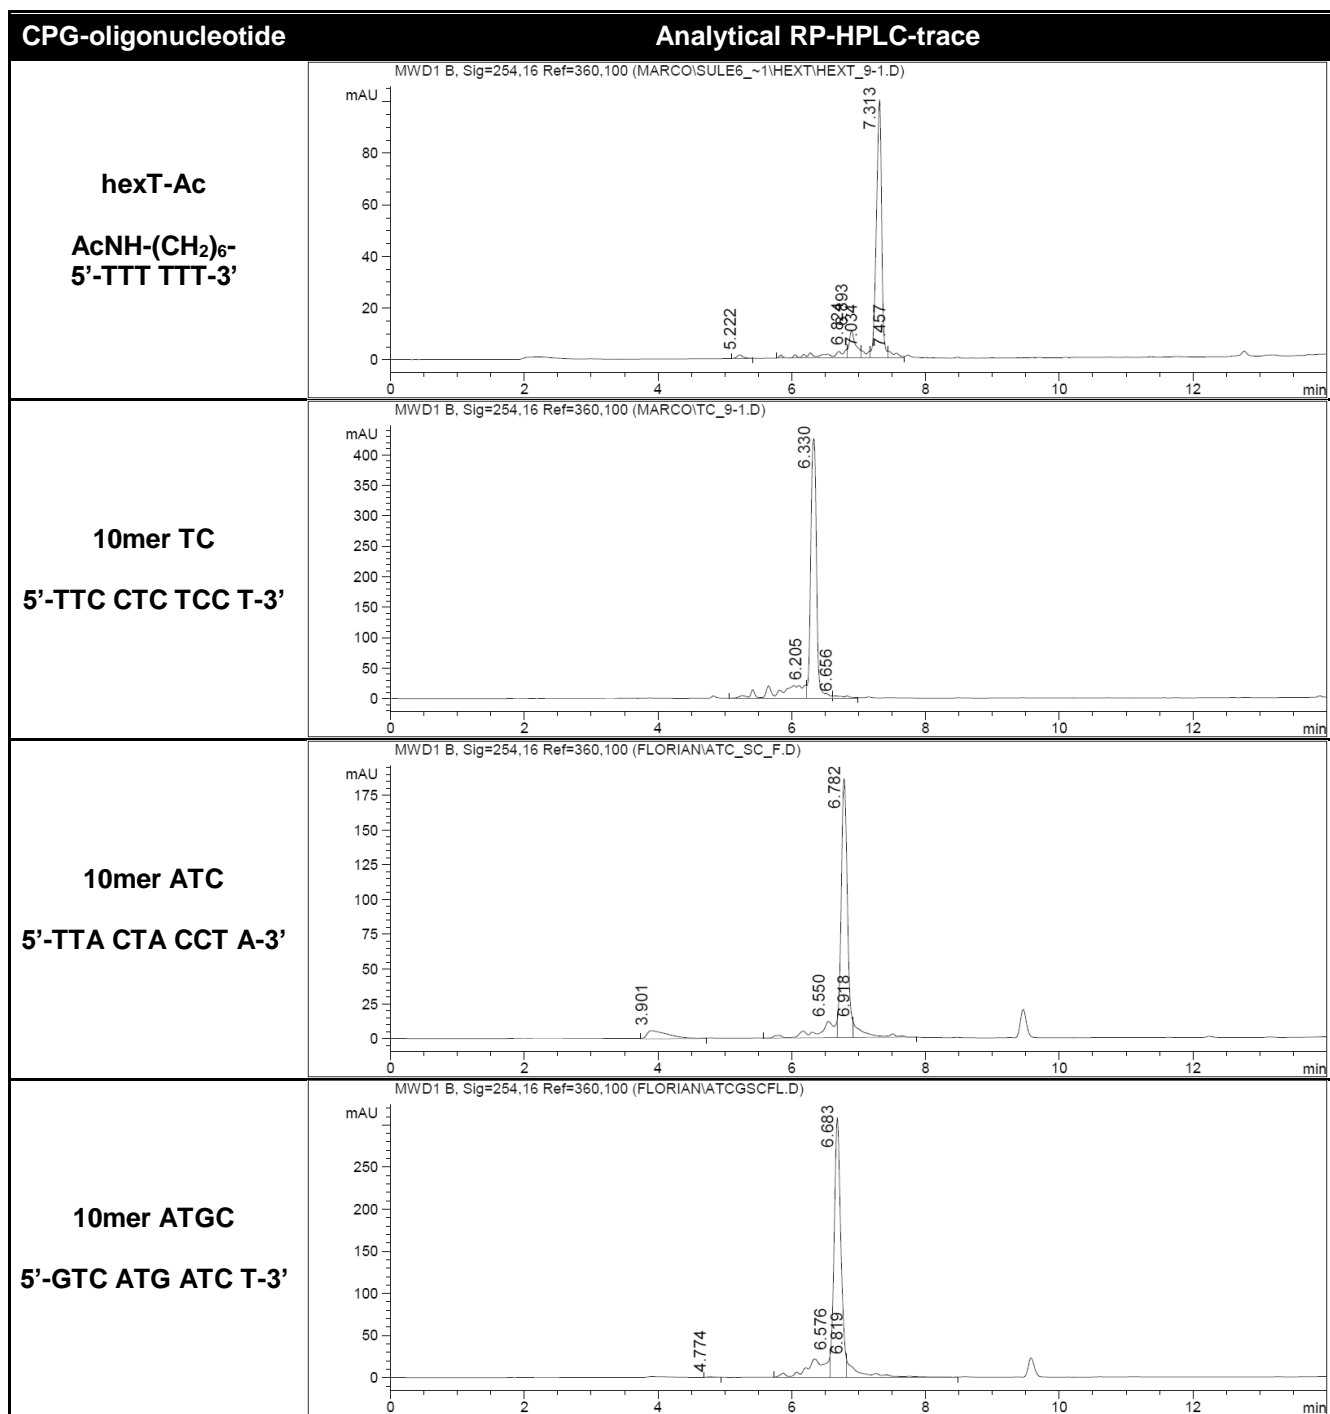

## CPG-oligonucleotide

## MALDI-MS spectra

hexT-Ac

 $\text{AcNH}-(\text{CH}_2)_6-$   
5'-TTT TTT-3'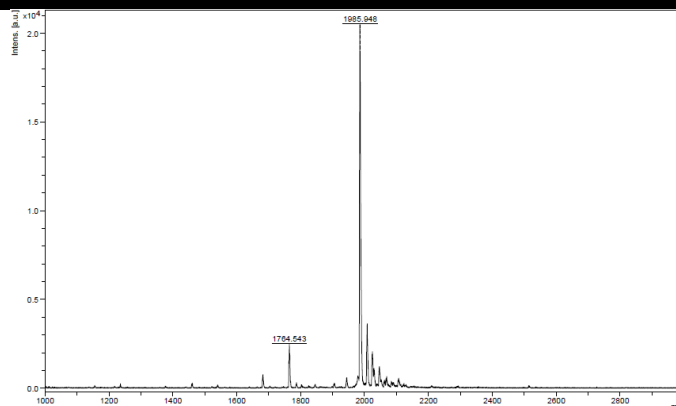mass calc. = 1985.4  
mass found = 1986.0

10mer TC

5'-TTC CTC TCC T-3'

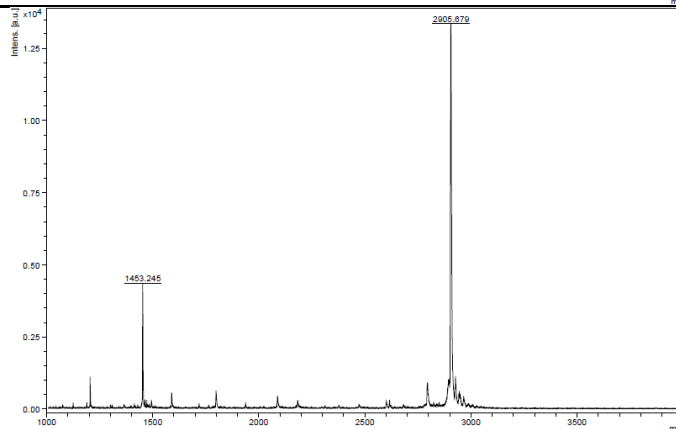mass calc. = 2904.9  
mass found = 2905.7

10mer ATC

5'-TTA CTA CCT A-3'

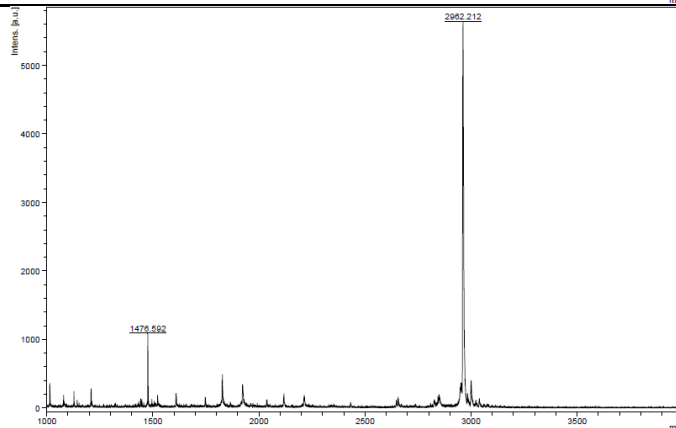mass calc. = 2962.0  
mass found = 2962.2

10mer ATGC

5'-GTC ATG ATC T-3'

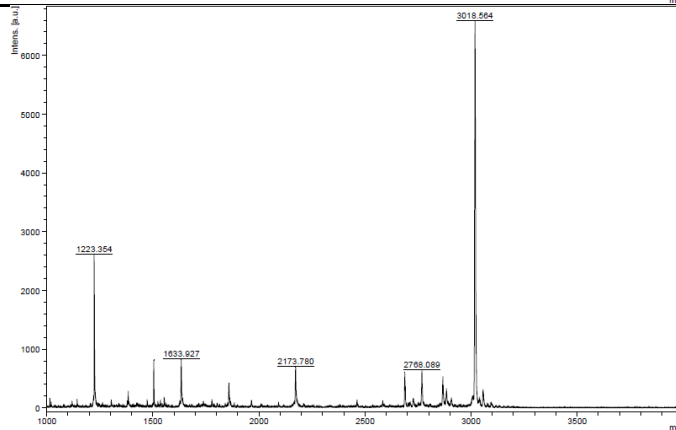mass calc. = 3019.0  
mass found = 3018.6



## CPG-oligonucleotide + SeO<sub>2</sub>

According to the representative procedure (RP-03) solid support coupled oligonucleotide (20 nmol) was treated with SeO<sub>2</sub> (200 equiv., 4 µmol) in dry MeOH.

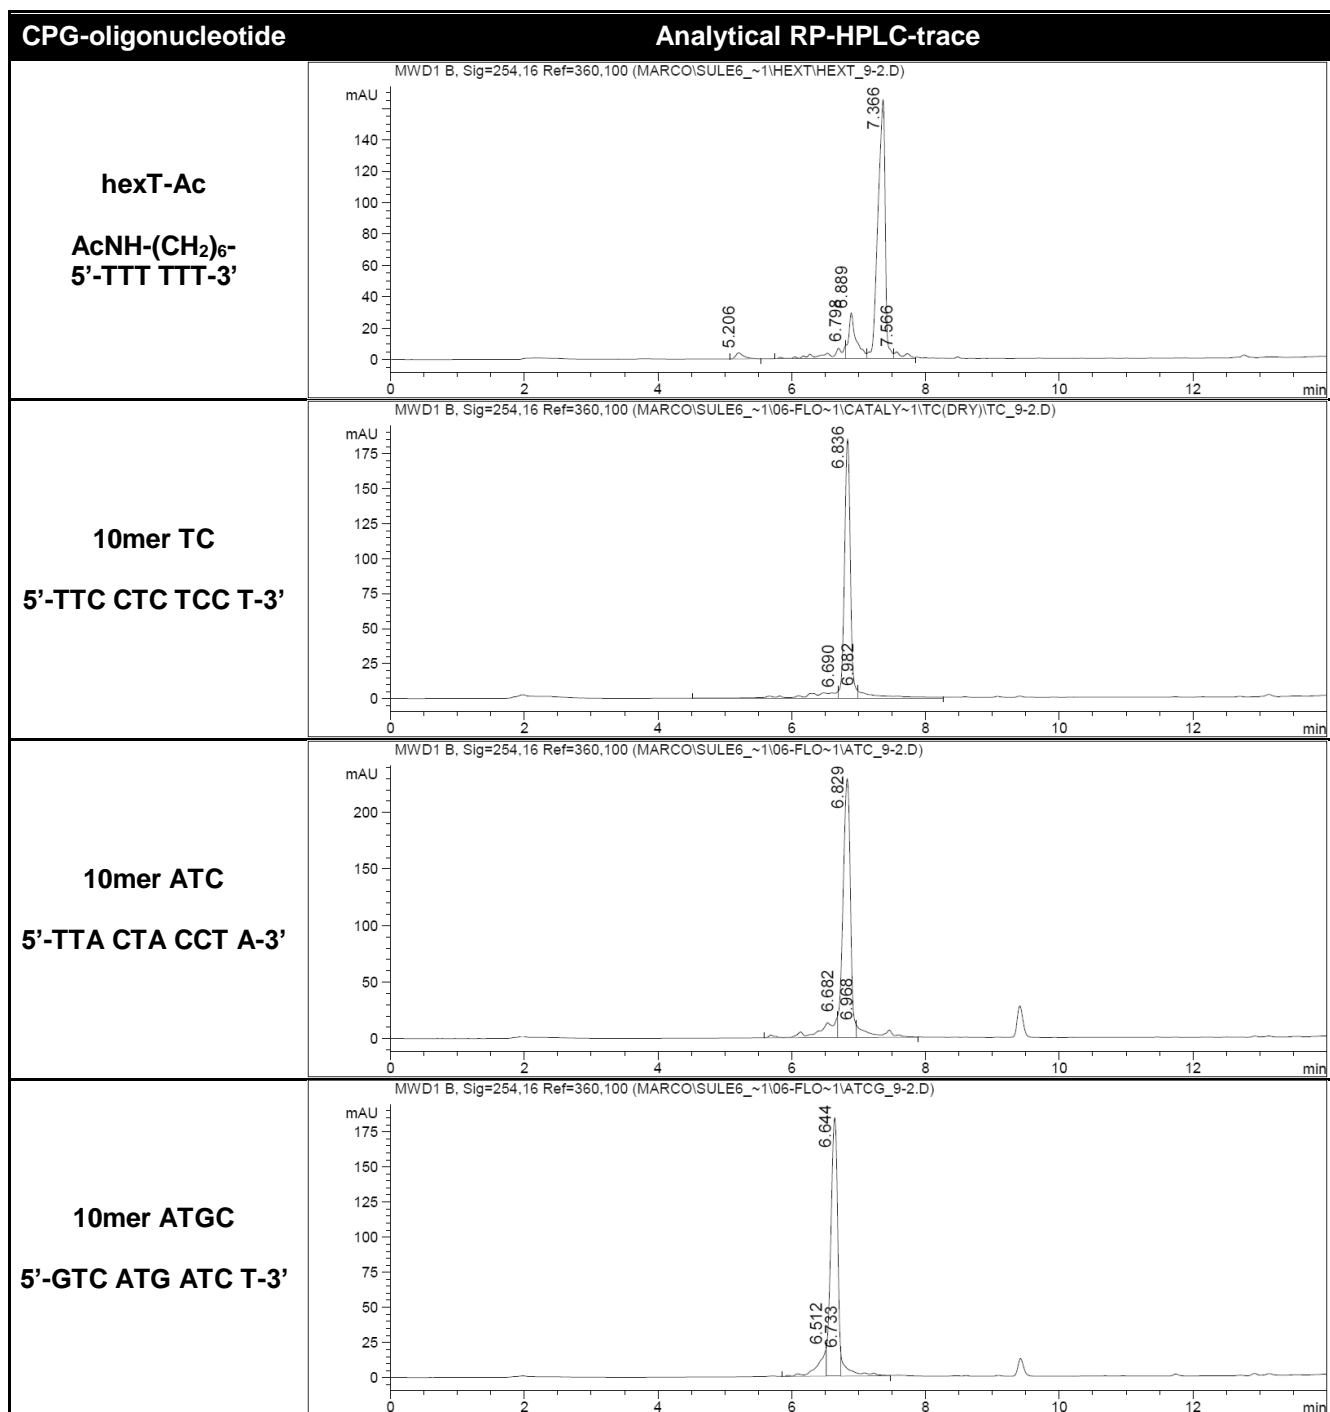

## CPG-oligonucleotide

## MALDI-MS spectra

hexT-Ac

 $\text{AcNH}-(\text{CH}_2)_6-$   
5'-TTT TTT-3'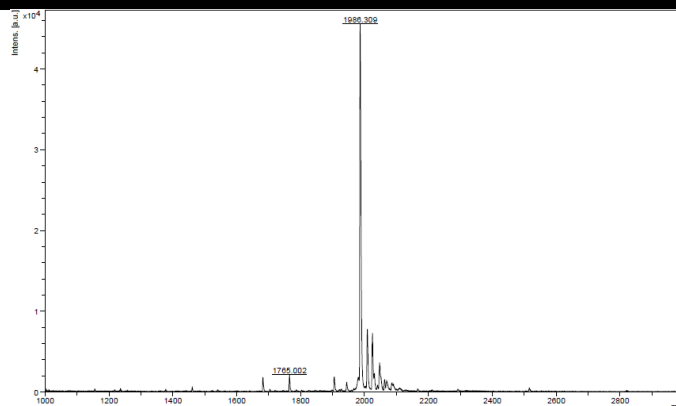mass calc. = 1985.4  
mass found = 1986.3

10mer TC

5'-TTC CTC TCC T-3'

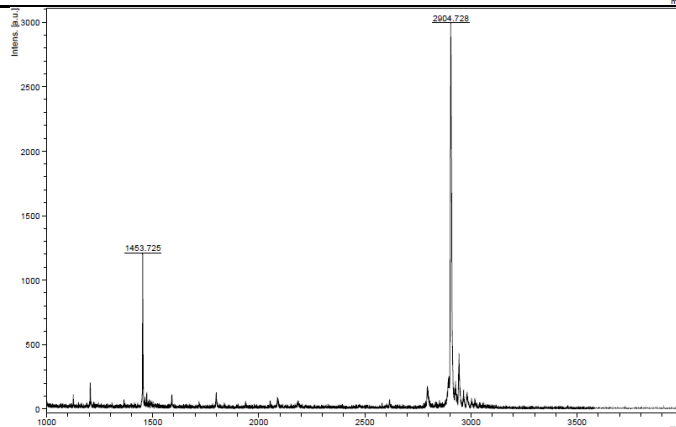mass calc. = 2904.9  
mass found = 2904.7

10mer ATC

5'-TTA CTA CCT A-3'

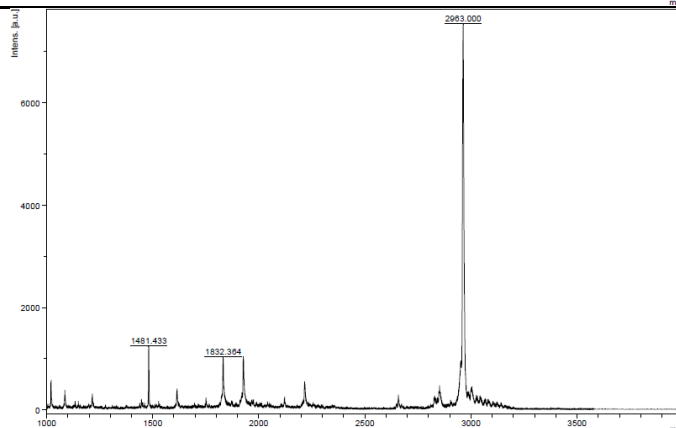mass calc. = 2962.0  
mass found = 2963.0

10mer ATGC

5'-GTC ATG ATC T-3'

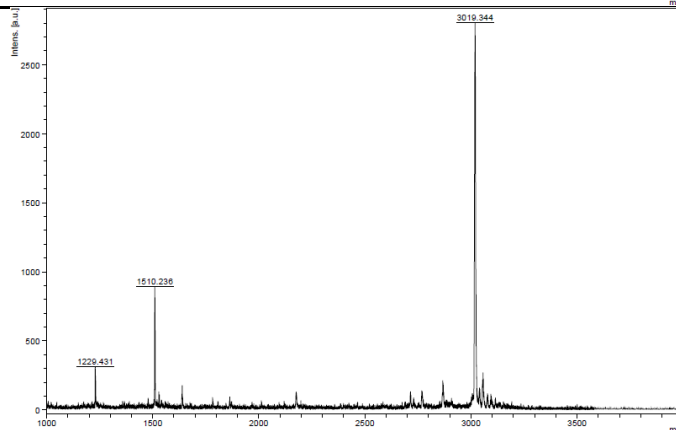mass calc. = 3019.0  
mass found = 3019.3

## CPG-oligonucleotide + $\text{Ti}(\text{O}i\text{-Pr})_4$

According to the representative procedure (RP-03) solid support coupled oligonucleotide (20 nmol) was treated with  $\text{Ti}(\text{O}i\text{-Pr})_4$  (200 equiv., 4  $\mu\text{mol}$ ) in dry MeOH.

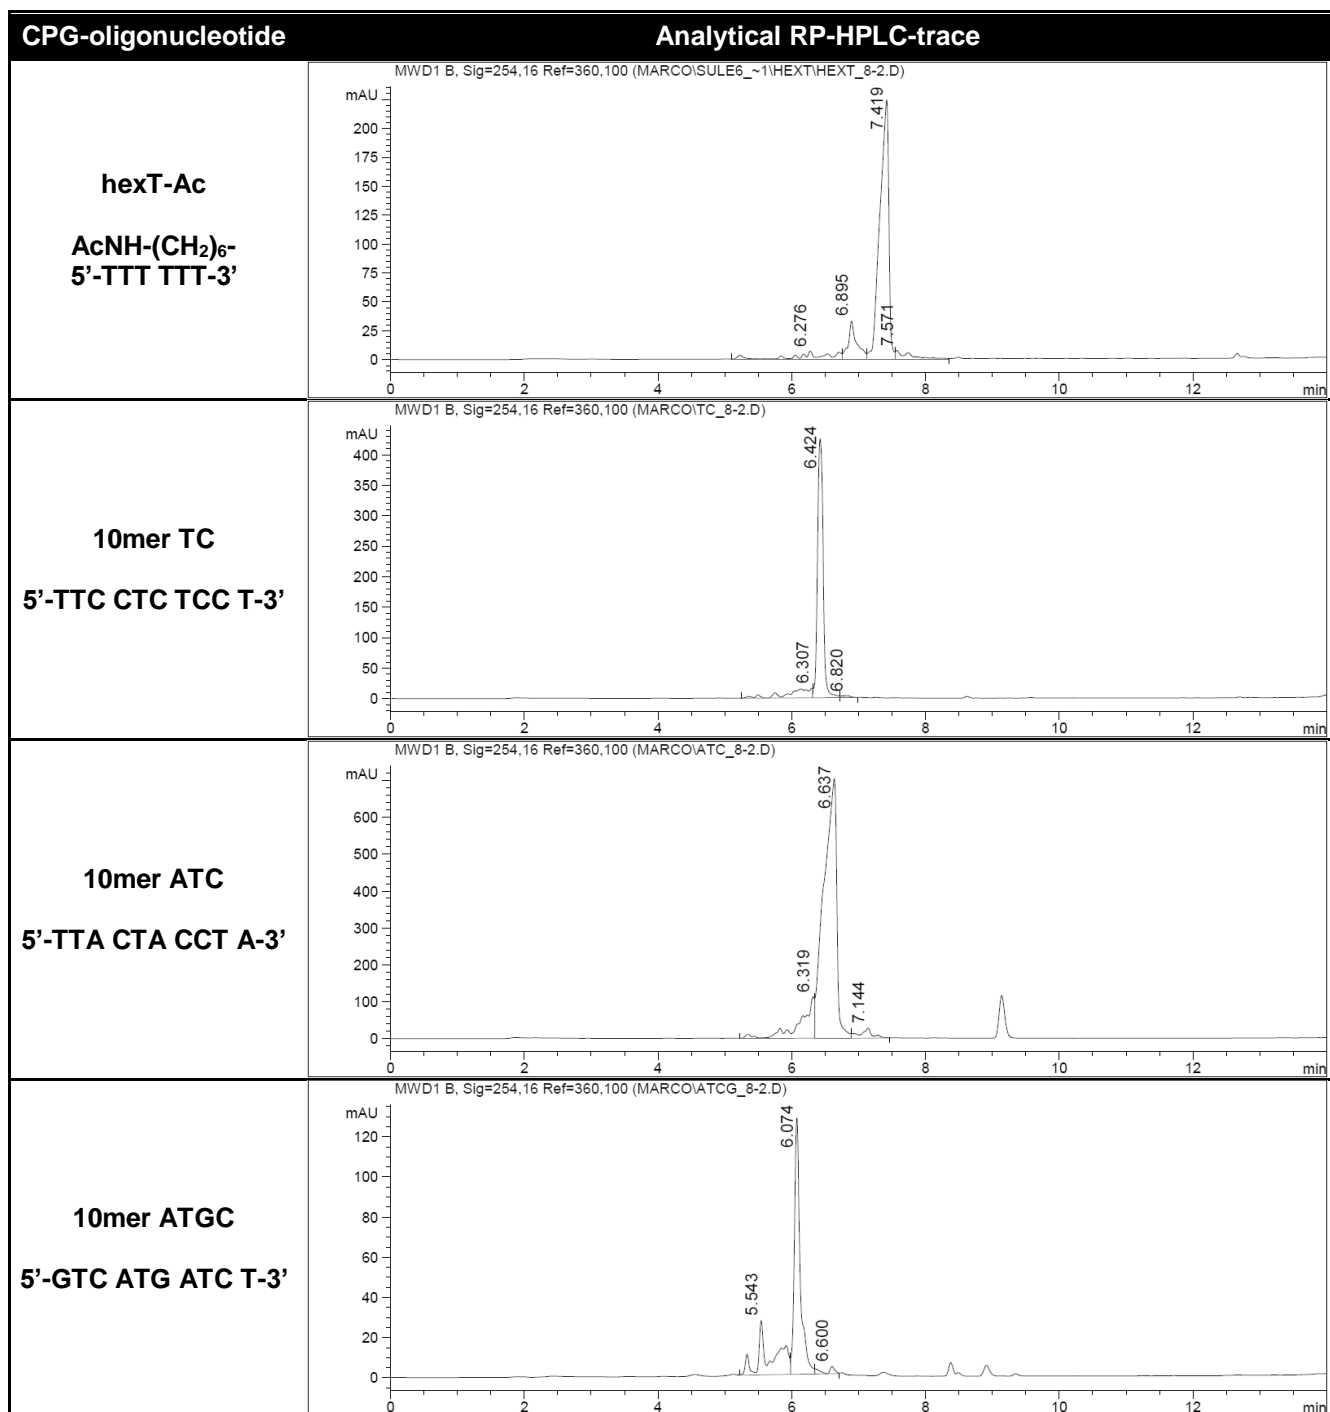

## CPG-oligonucleotide

## MALDI-MS spectra

hexT-Ac

 $\text{AcNH}-(\text{CH}_2)_6-$   
5'-TTT TTT-3'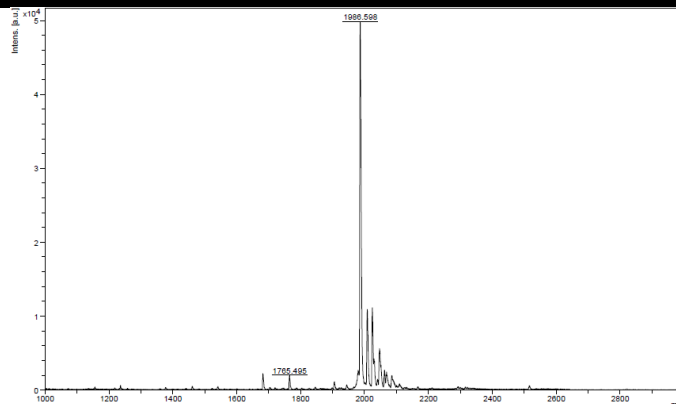mass calc. = 1985.4  
mass found = 1986.6

10mer TC

5'-TTC CTC TCC T-3'

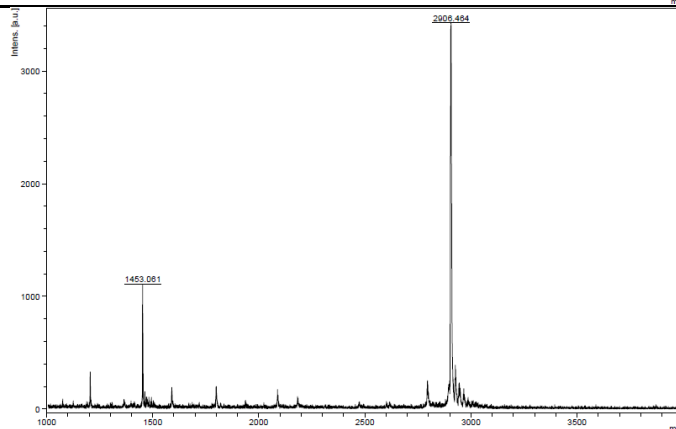mass calc. = 2904.9  
mass found = 2906.5

10mer ATC

5'-TTA CTA CCT A-3'

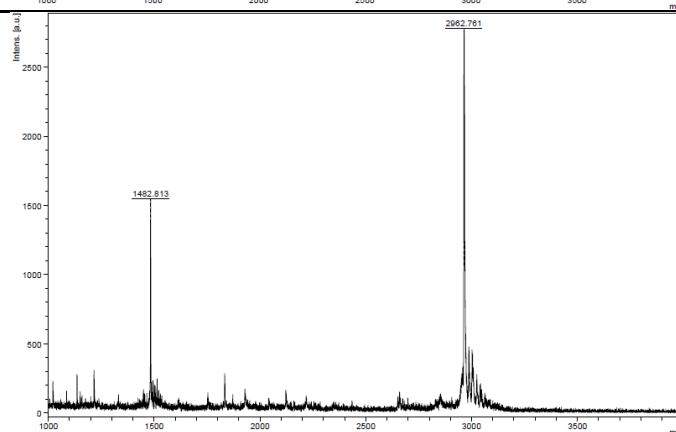mass calc. = 2962.0  
mass found = 2962.8

10mer ATGC

5'-GTC ATG ATC T-3'

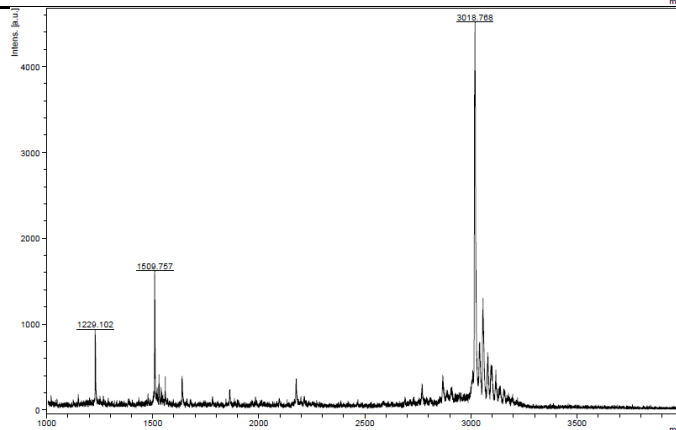mass calc. = 3019.0  
mass found = 3018.8

## CPG-oligonucleotide + VO(acac)<sub>2</sub>

According to the representative procedure (RP-03) solid support coupled oligonucleotide (20 nmol) was treated with VO(acac)<sub>2</sub> (200 equiv., 4 µmol) in dry MeOH.

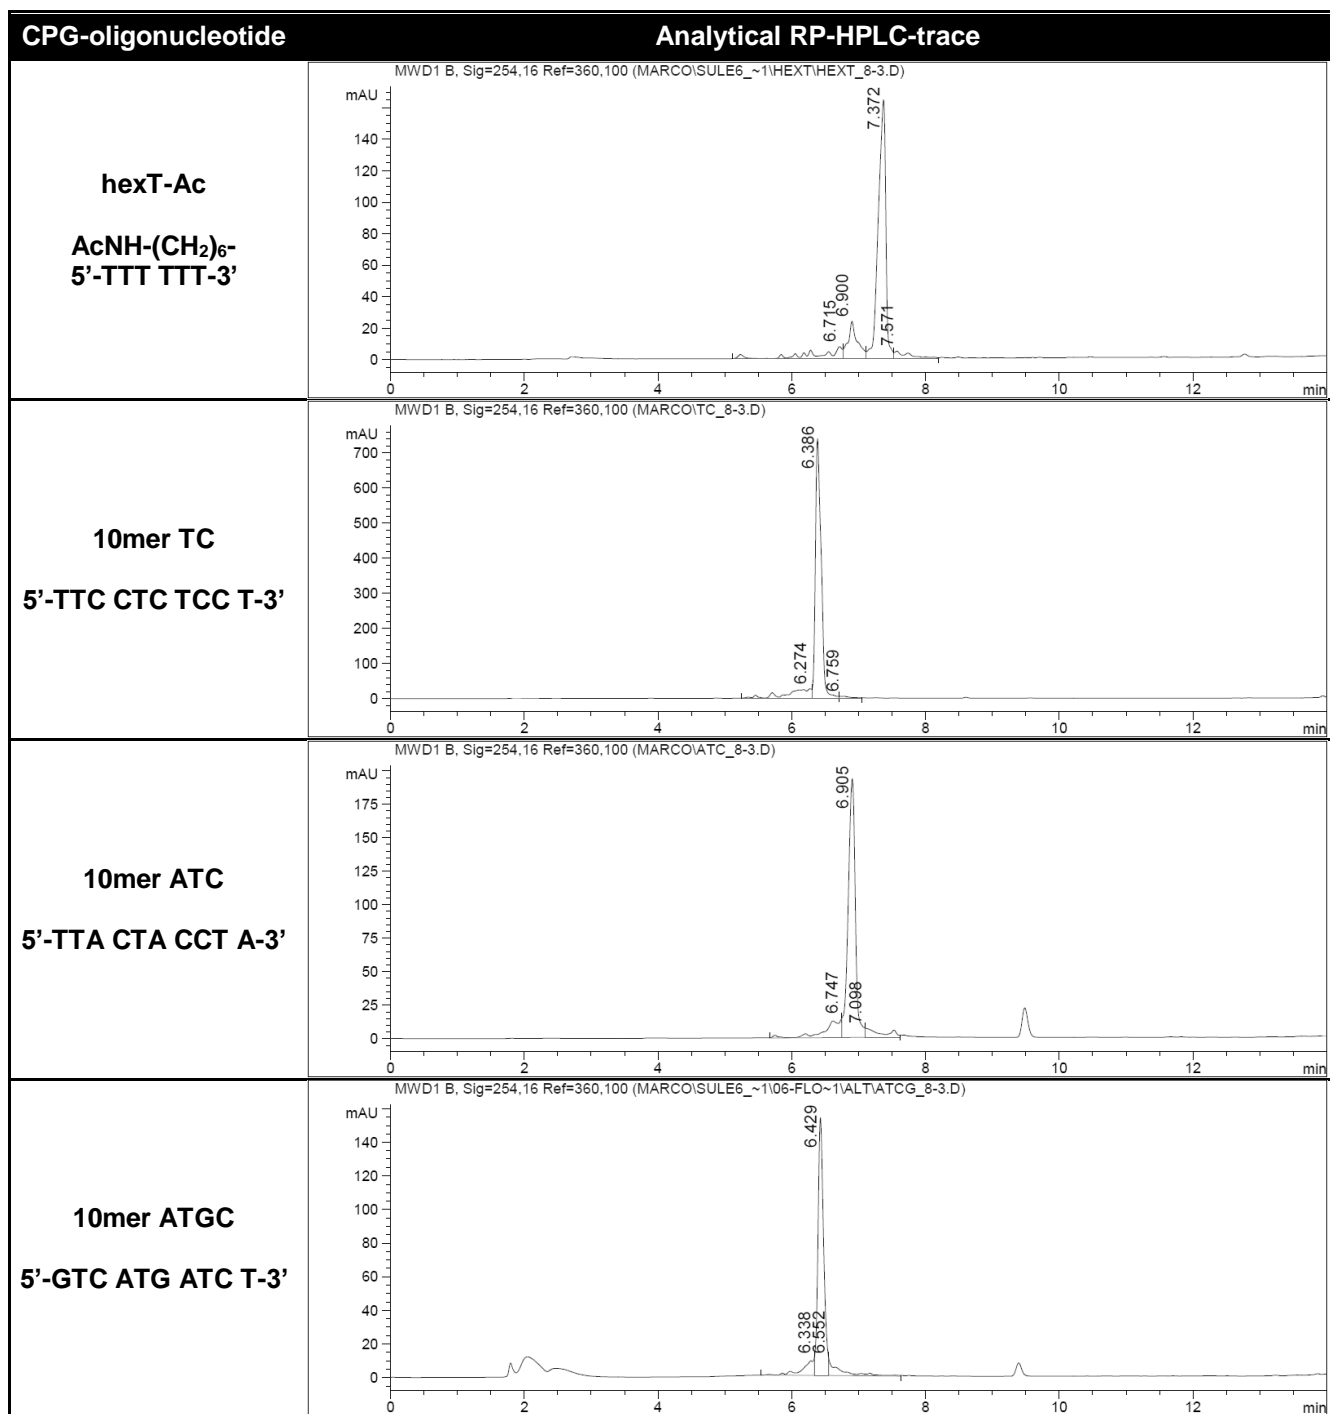

## CPG-oligonucleotide

## MALDI-MS spectra

hexT-Ac

 $\text{AcNH}-(\text{CH}_2)_6-$   
5'-TTT TTT-3'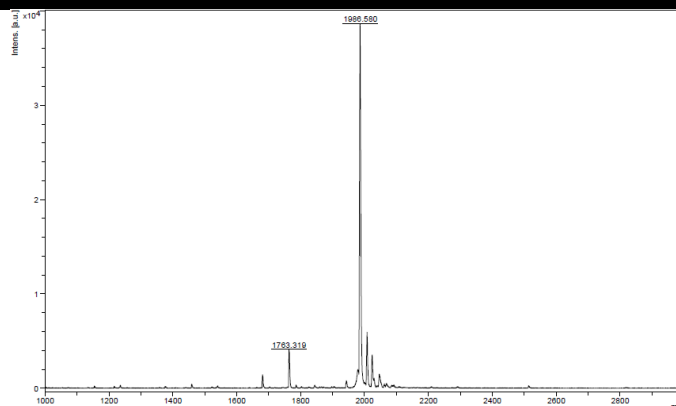mass calc. = 1985.4  
mass found = 1986.6

10mer TC

5'-TTC CTC TCC T-3'

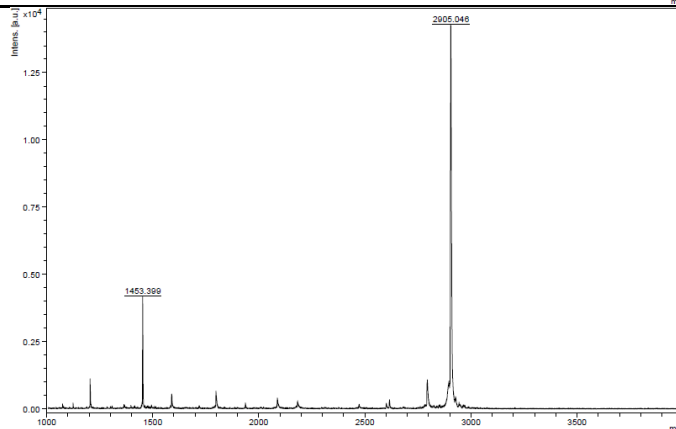mass calc. = 2904.9  
mass found = 2905.0

10mer ATC

5'-TTA CTA CCT A-3'

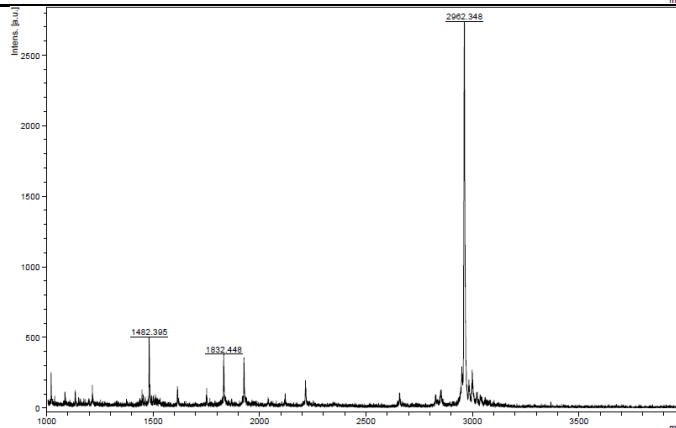mass calc. = 2962.0  
mass found = 2962.3

10mer ATGC

5'-GTC ATG ATC T-3'

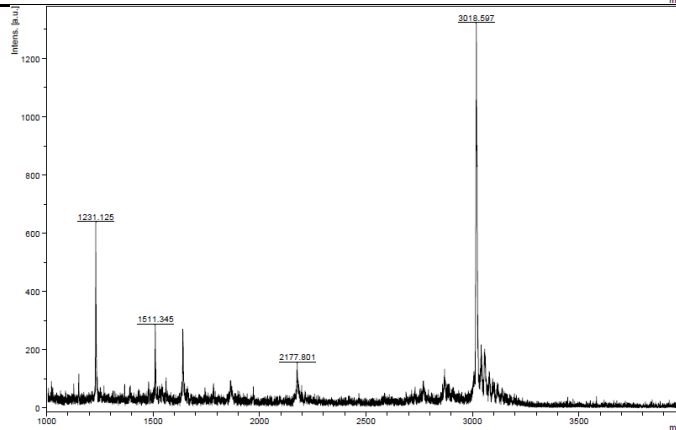mass calc. = 3019.0  
mass found = 3018.6

### CPG-oligonucleotide + Yb(OTf)<sub>3</sub>

According to the representative procedure (RP-03) solid support coupled oligonucleotide (20 nmol) was treated with Yb(OTf)<sub>3</sub> (200 equiv., 4 μmol) in dry MeOH.

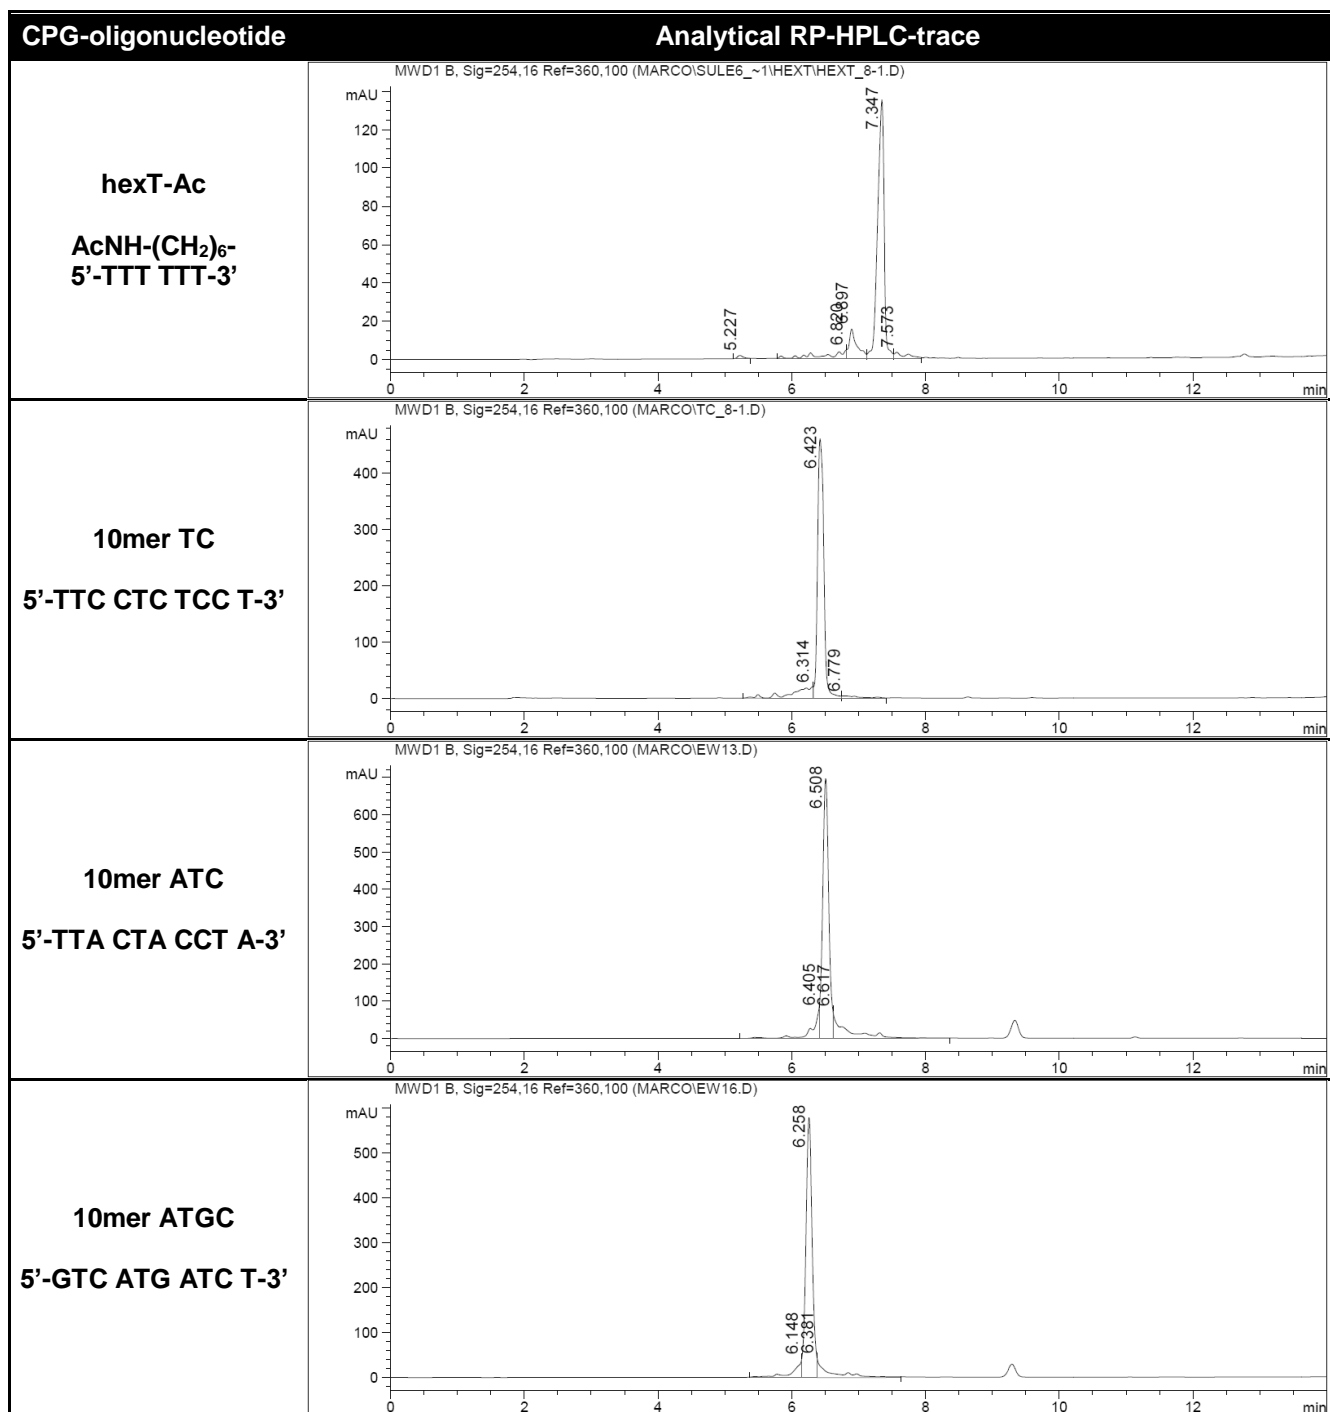

## CPG-oligonucleotide

## MALDI-MS spectra

hexT-Ac

 $\text{AcNH}-(\text{CH}_2)_6-$   
5'-TTT TTT-3'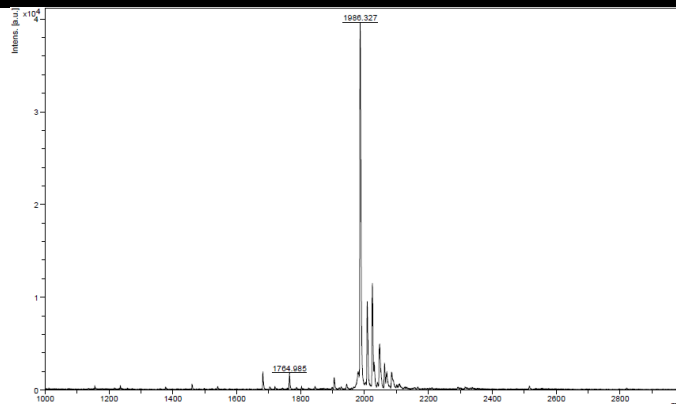mass calc. = 1985.4  
mass found = 1986.3

10mer TC

5'-TTC CTC TCC T-3'

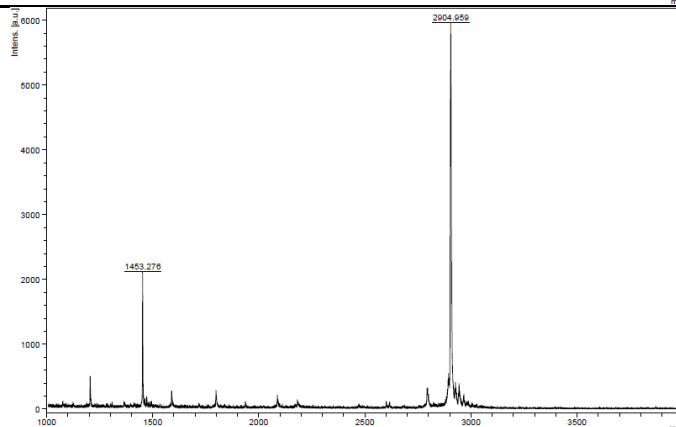mass calc. = 2904.9  
mass found = 2905.0

10mer ATC

5'-TTA CTA CCT A-3'

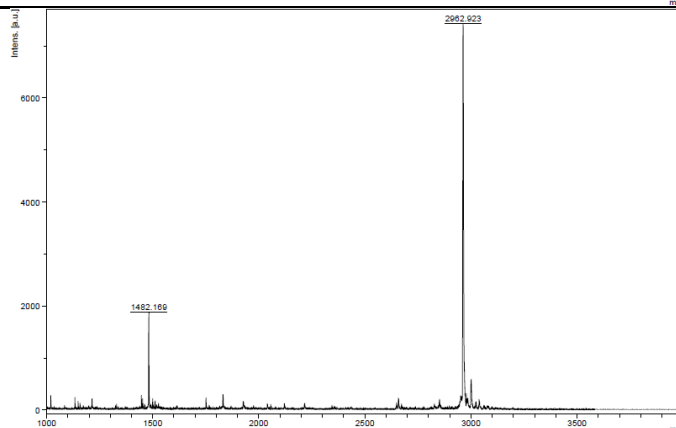mass calc. = 2962.0  
mass found = 2963.0

10mer ATGC

5'-GTC ATG ATC T-3'

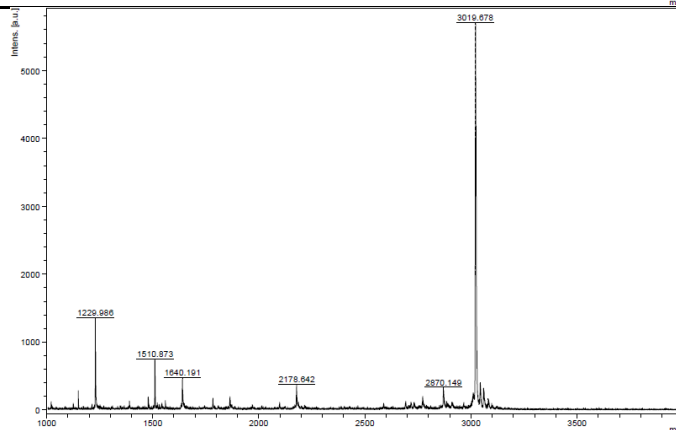mass calc. = 3019.0  
mass found = 3019.7



## CPG-oligonucleotide + ZnCl<sub>2</sub>

According to the representative procedure (RP-03) solid support coupled oligonucleotide (20 nmol) was treated with ZnCl<sub>2</sub> (200 equiv., 4 µmol) in dry ACN.

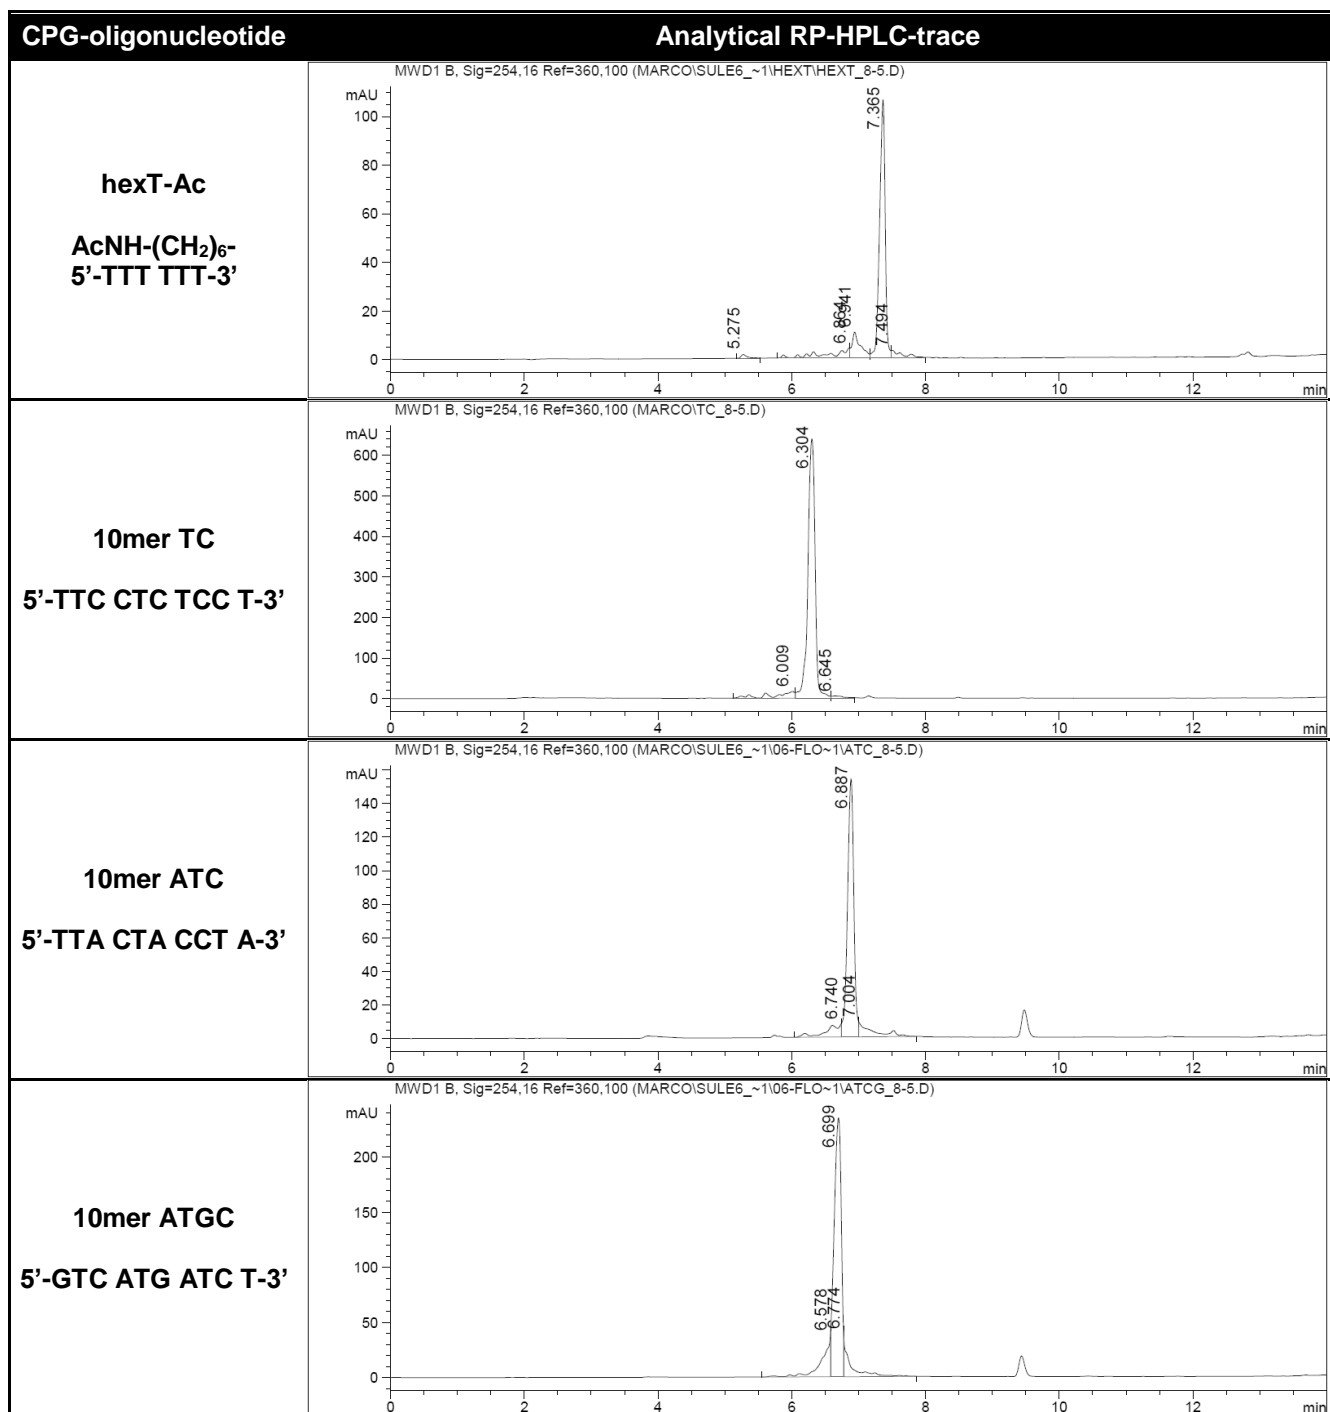

## CPG-oligonucleotide

## MALDI-MS spectra

hexT-Ac

 $\text{AcNH}-(\text{CH}_2)_6-$   
5'-TTT TTT-3'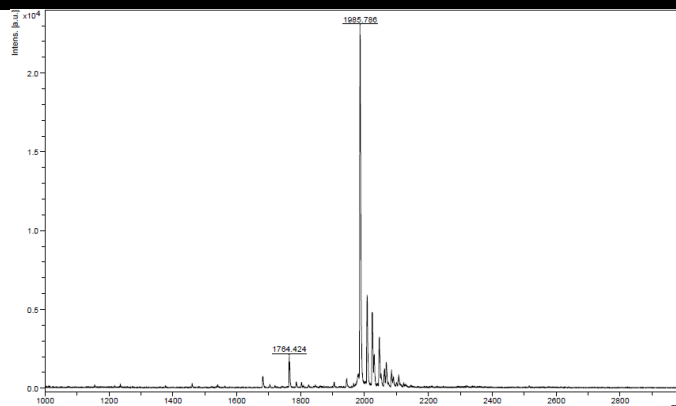mass calc. = 1985.4  
mass found = 1985.8

10mer TC

5'-TTC CTC TCC T-3'

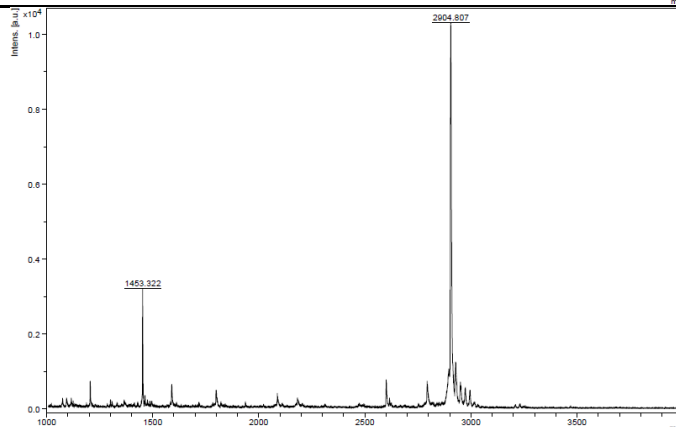mass calc. = 2904.9  
mass found = 2904.8

10mer ATC

5'-TTA CTA CCT A-3'

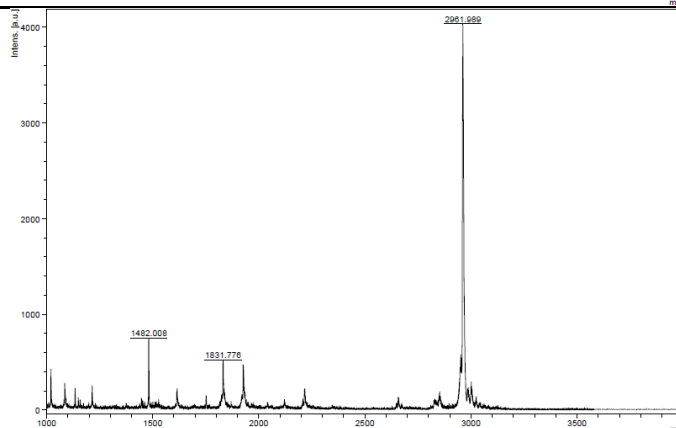mass calc. = 2962.0  
mass found = 2962.0

10mer ATGC

5'-GTC ATG ATC T-3'

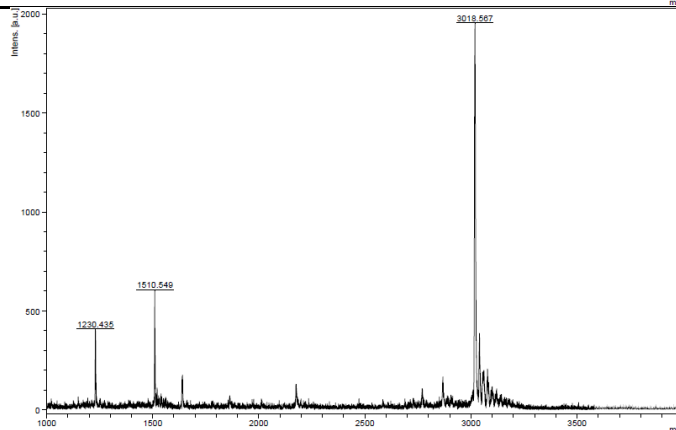mass calc. = 3019.0  
mass found = 3018.6

**TableS2** – Stability of DNA against metal salts at 40 °C<sup>a</sup>

| Entry | Metal salt           | Solvent | ATC | ATCG |
|-------|----------------------|---------|-----|------|
| 1     | Cu(OTf) <sub>2</sub> | ACN     |     |      |
| 2     | InCl <sub>3</sub>    | ACN     |     |      |
| 3     | SeO <sub>2</sub>     | MeOH    |     |      |
| 4     | Yb(OTf) <sub>3</sub> | MeOH    |     |      |
| 5     | Sc(OTf) <sub>3</sub> | ACN     |     |      |

<sup>a</sup> for each: 20 nmol DNA, 200 eq. transition metal salt, 50 µL solvent (HPLC-grade), 40 °C., 22 h. ACN = acetonitrile, MeOH = methanol.

**Table S3** – Stability of DNA against metal salts dissolved in benchtop solvents<sup>a</sup>

| Entry | Metal salt            | Solvent | ATC | ATCG |
|-------|-----------------------|---------|-----|------|
| 1     | AgOTf                 | ACN     |     |      |
| 2     | BiBr <sub>3</sub>     | ACN     |     |      |
| 3     | InCl <sub>3</sub>     | ACN     |     |      |
| 4     | LiBr                  | ACN     |     |      |
| 5     | Ni(acac) <sub>2</sub> | ACN     |     |      |
| 6     | Yb(OTf) <sub>3</sub>  | MeOH    |     |      |

<sup>a</sup> for each: 20 nmol DNA, 200 eq. transition metal salt, 50 µL solvent (HPLC-grade), r.t., 22 h. ACN = acetonitrile, MeOH = methanol.

|       |        |        |       |                 |
|-------|--------|--------|-------|-----------------|
|       |        |        |       | DNA degradation |
| 0-20% | 21-40% | 41-60% | > 61% |                 |

## HPLC traces and MALDI-MS spectra of metal ion screens

### CPG-oligonucleotide + Cu(OTf)<sub>2</sub>

According to the representative procedure (RP-03) solid support coupled oligonucleotide (20 nmol) was treated with Yb(OTf)<sub>3</sub> (200 equiv., 4 μmol) in dry ACN at 40 °C.

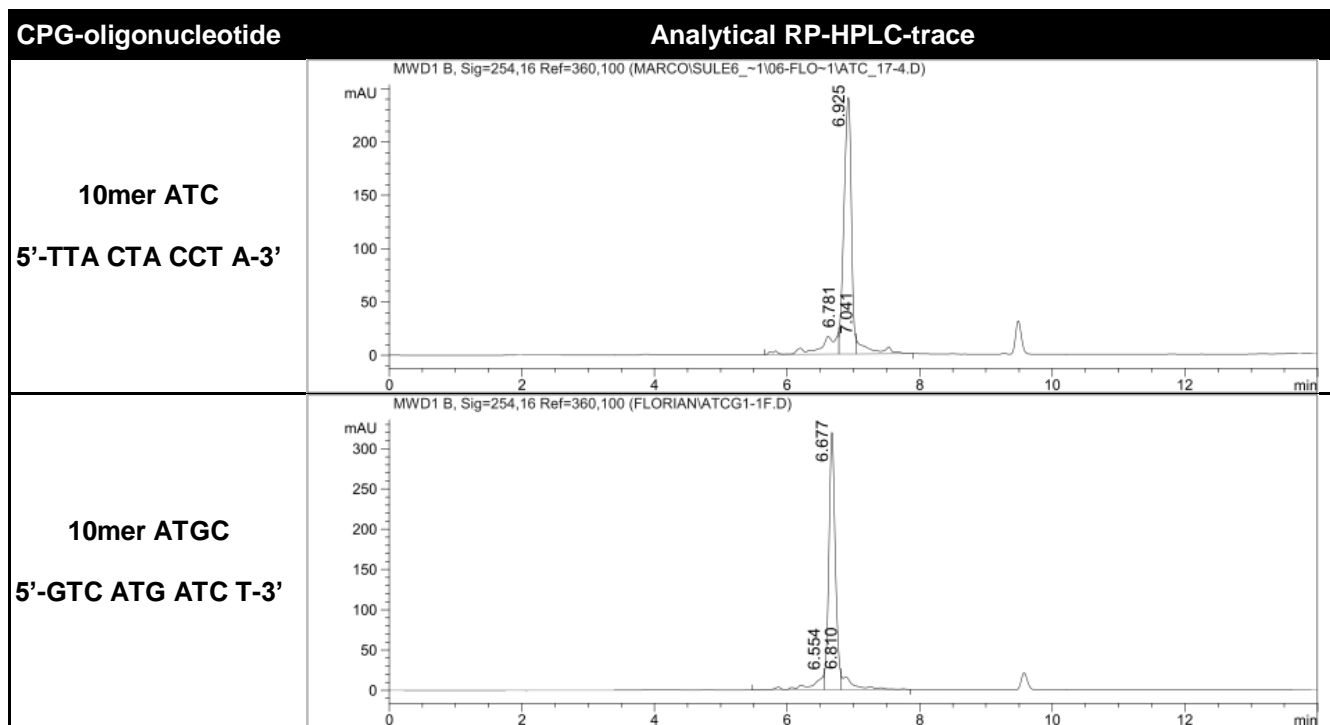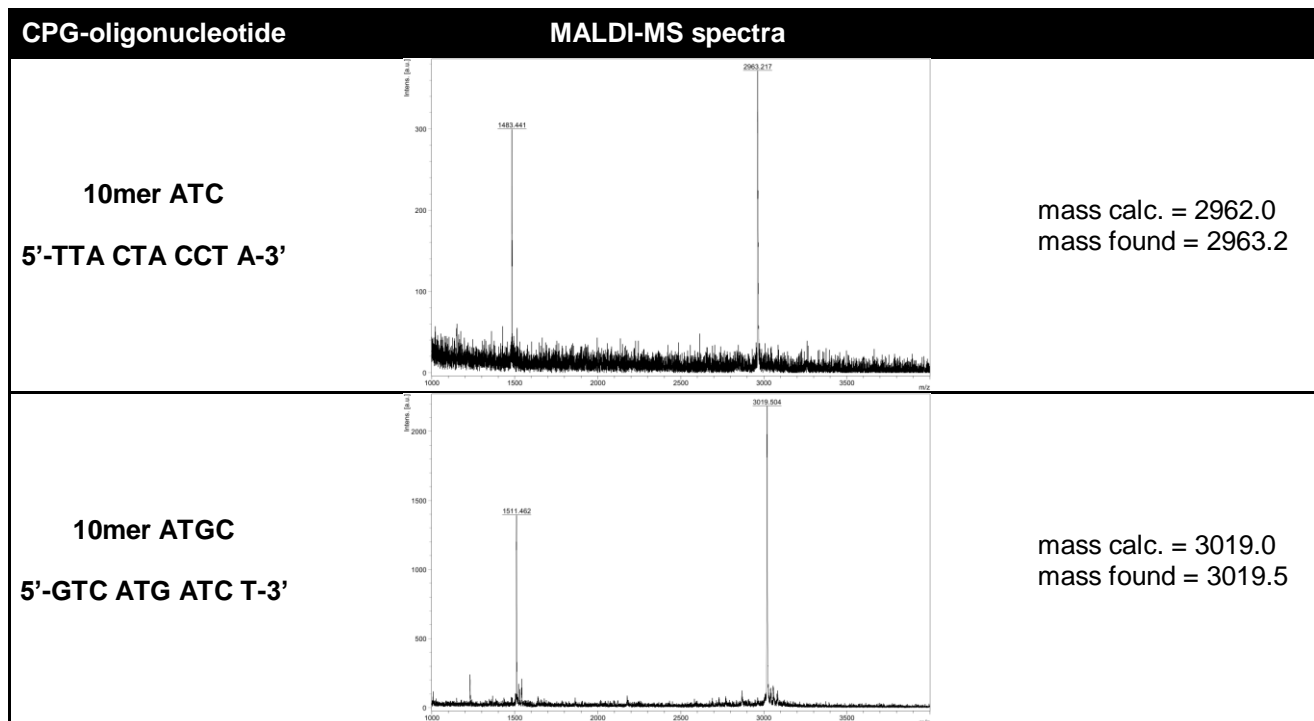

### CPG-oligonucleotide + InCl<sub>3</sub>

According to the representative procedure (RP-03) solid support coupled oligonucleotide (20 nmol) was treated with InCl<sub>3</sub> (200 equiv., 4 μmol) in dry ACN at 40 °C.

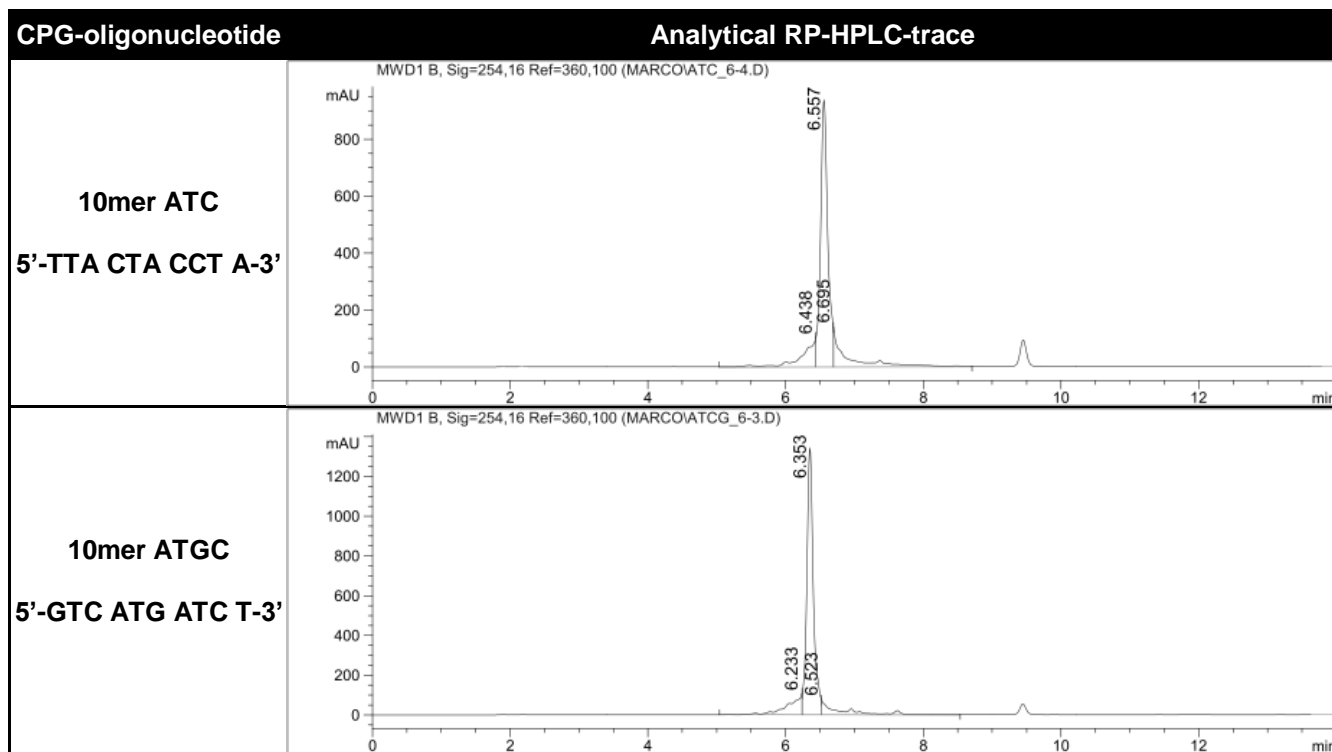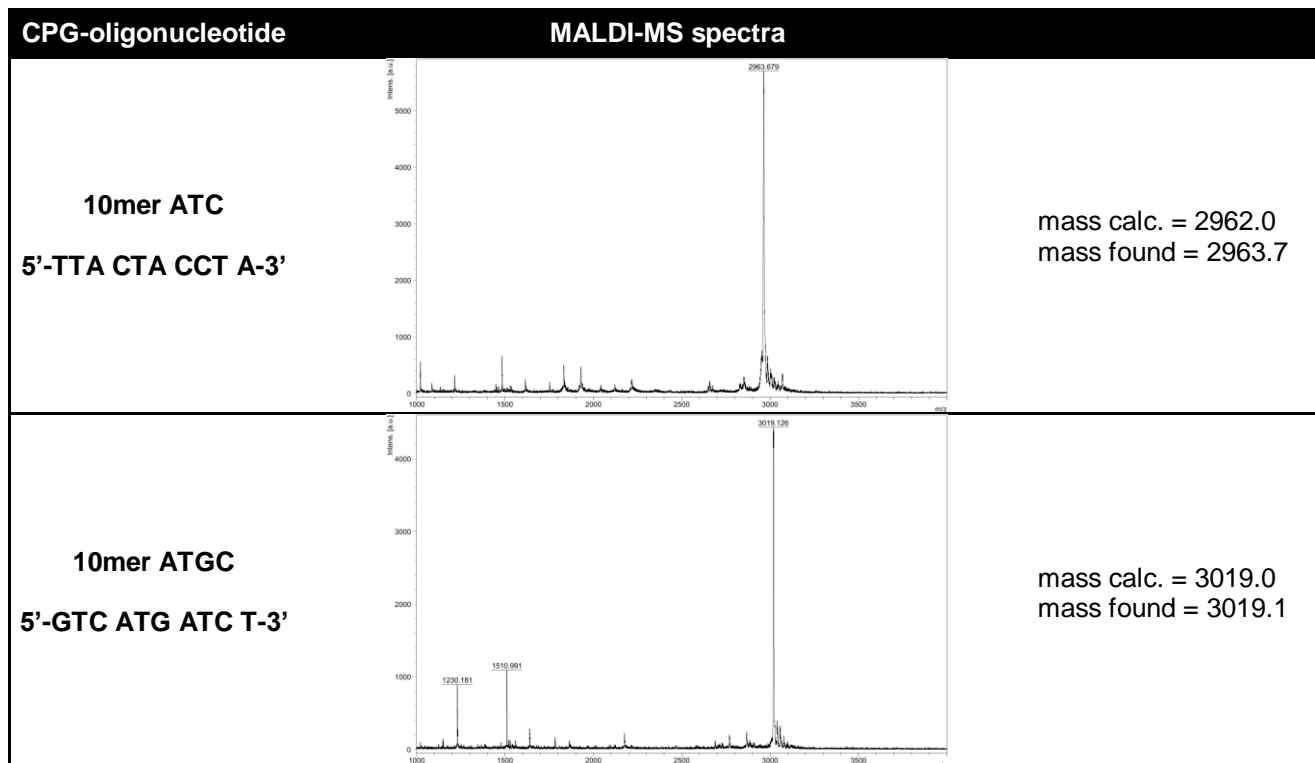

## CPG-oligonucleotide + SeO<sub>2</sub>

According to the representative procedure (RP-03) solid support coupled oligonucleotide (20 nmol) was treated with SeO<sub>2</sub> (200 equiv., 4 µmol) in dry MeOH at 40 °C.

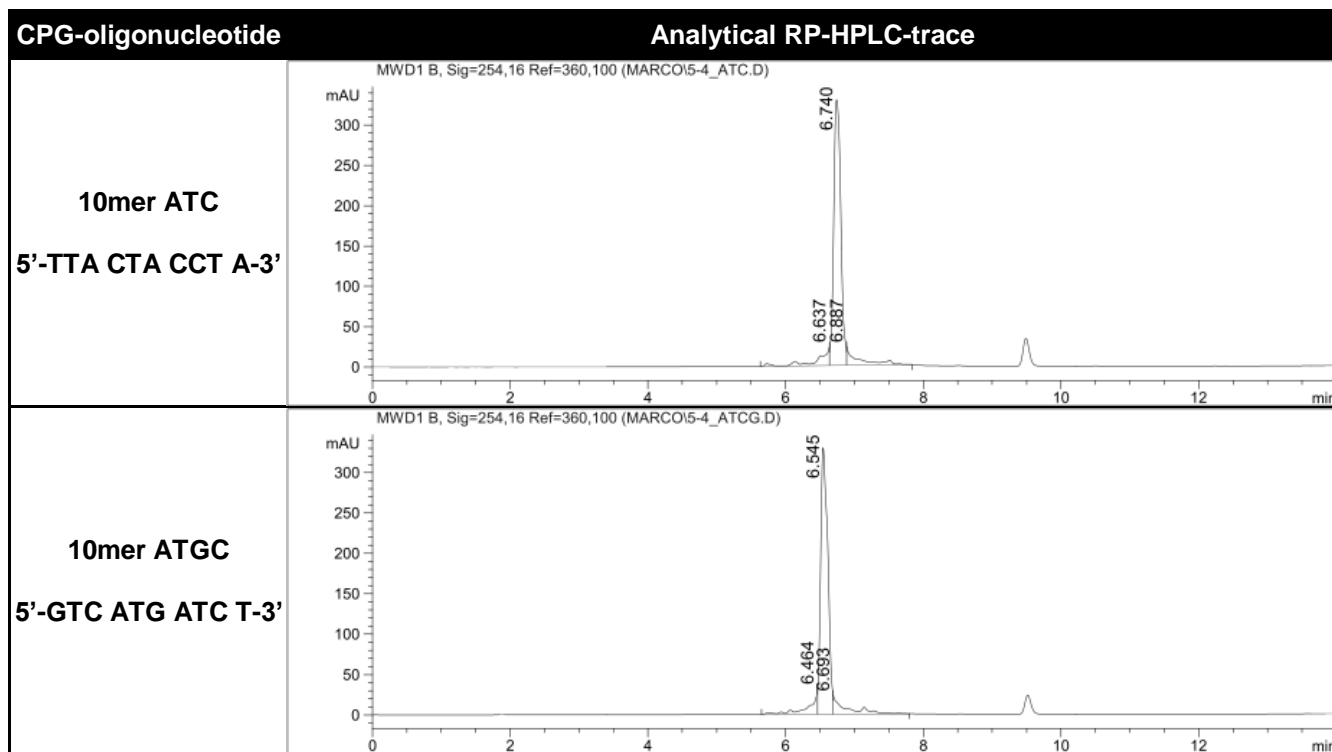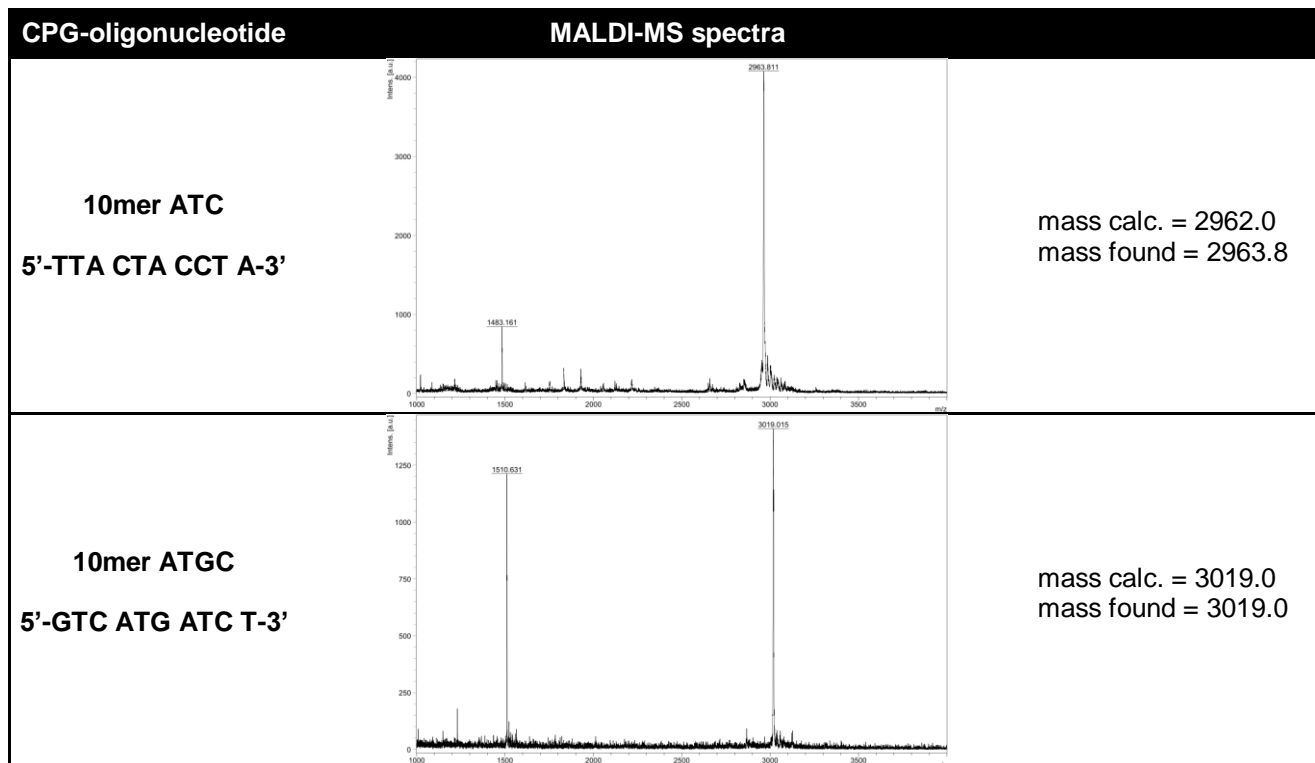

### CPG-oligonucleotide + Yb(OTf)<sub>3</sub>

According to the representative procedure (RP-03) solid support coupled oligonucleotide (20 nmol) was treated with Yb(OTf)<sub>3</sub> (200 equiv., 4 μmol) in dry MeOH at 40 °C.

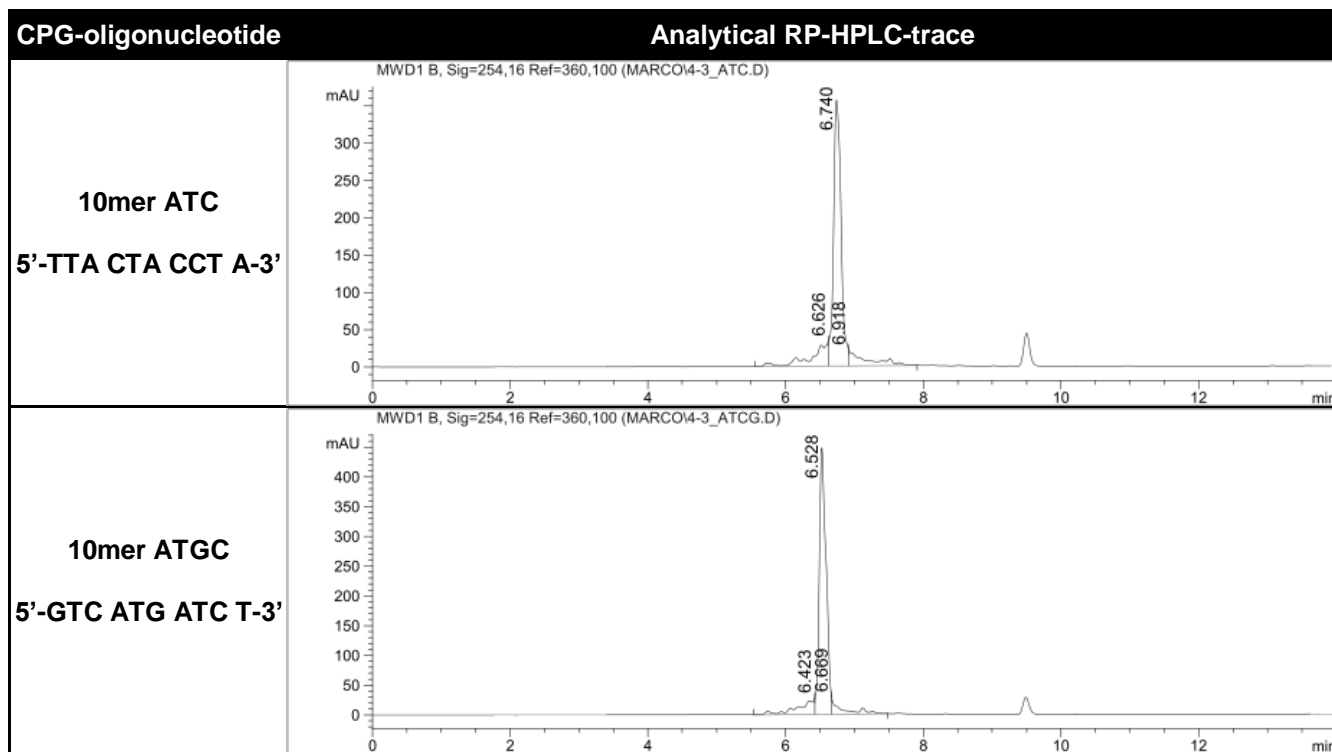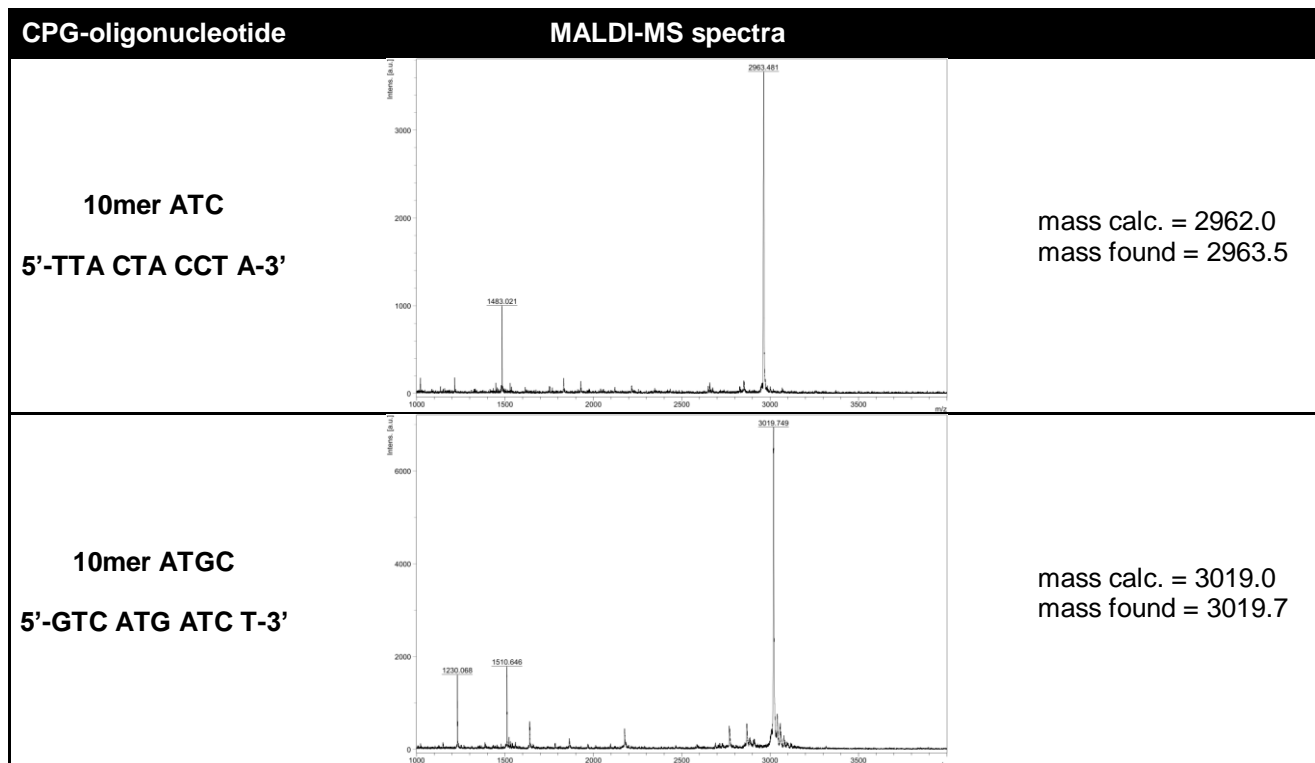

### CPG-oligonucleotide + Sc(OTf)<sub>3</sub>

According to the representative procedure (RP-03) solid support coupled oligonucleotide (20 nmol) was treated with Sc(OTf)<sub>3</sub> (200 equiv., 4  $\mu$ mol) in dry ACN at 40 °C.

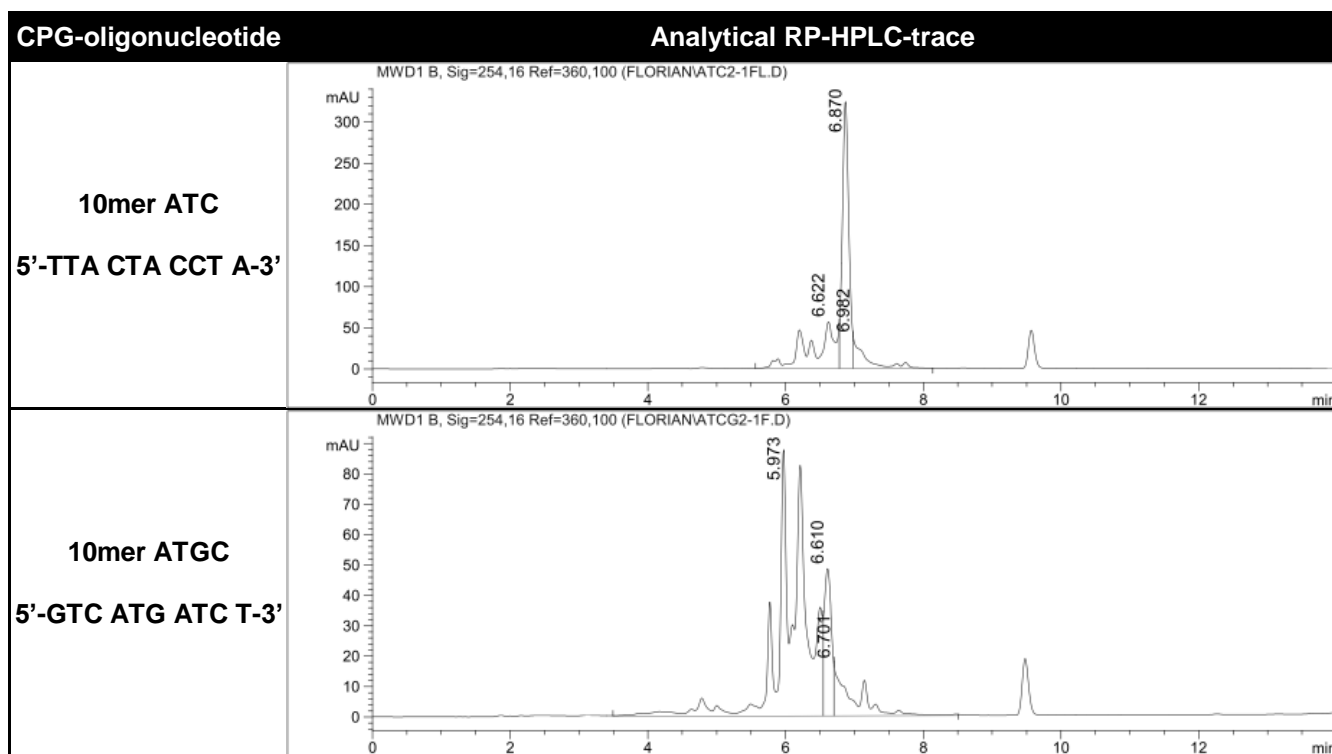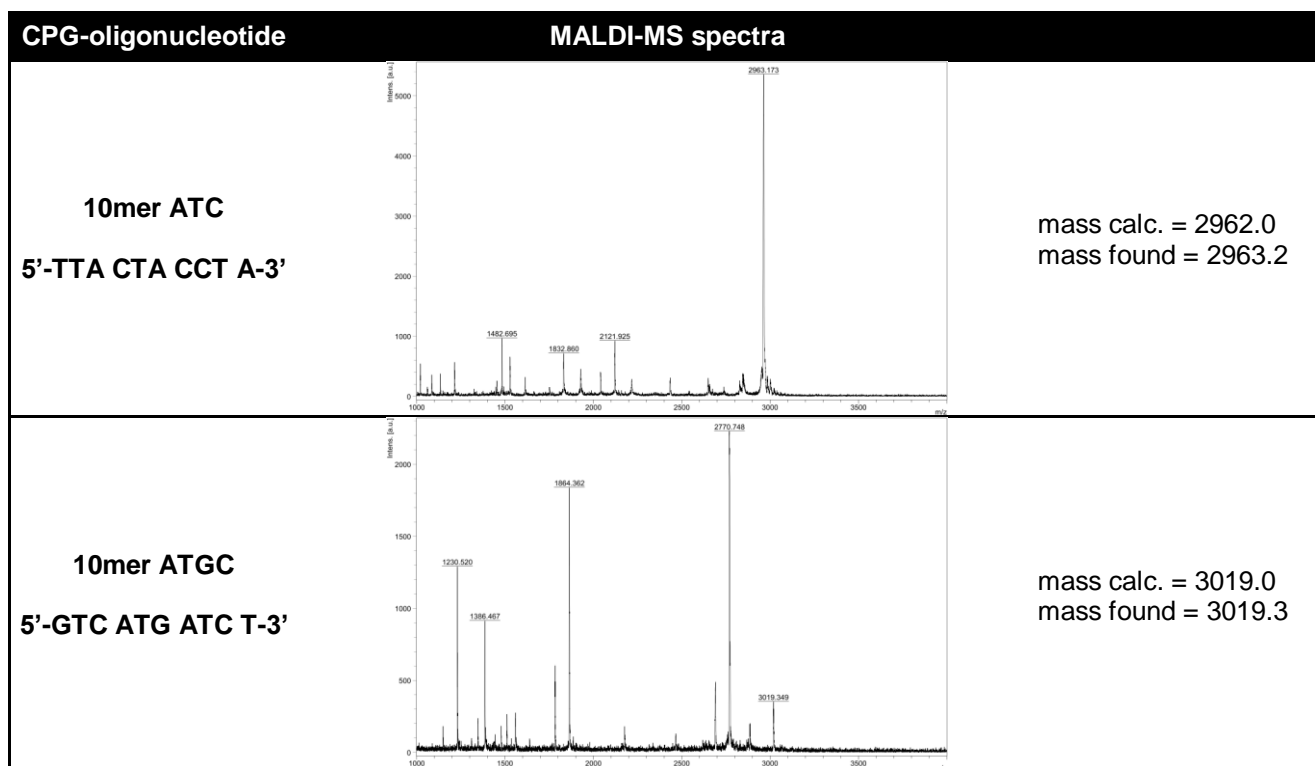



### CPG-oligonucleotide + AgOTf

According to the representative procedure (RP-03) solid support coupled oligonucleotide (20 nmol) was treated with AgOTf (200 equiv., 4  $\mu$ mol) in HPLC-grade ACN.

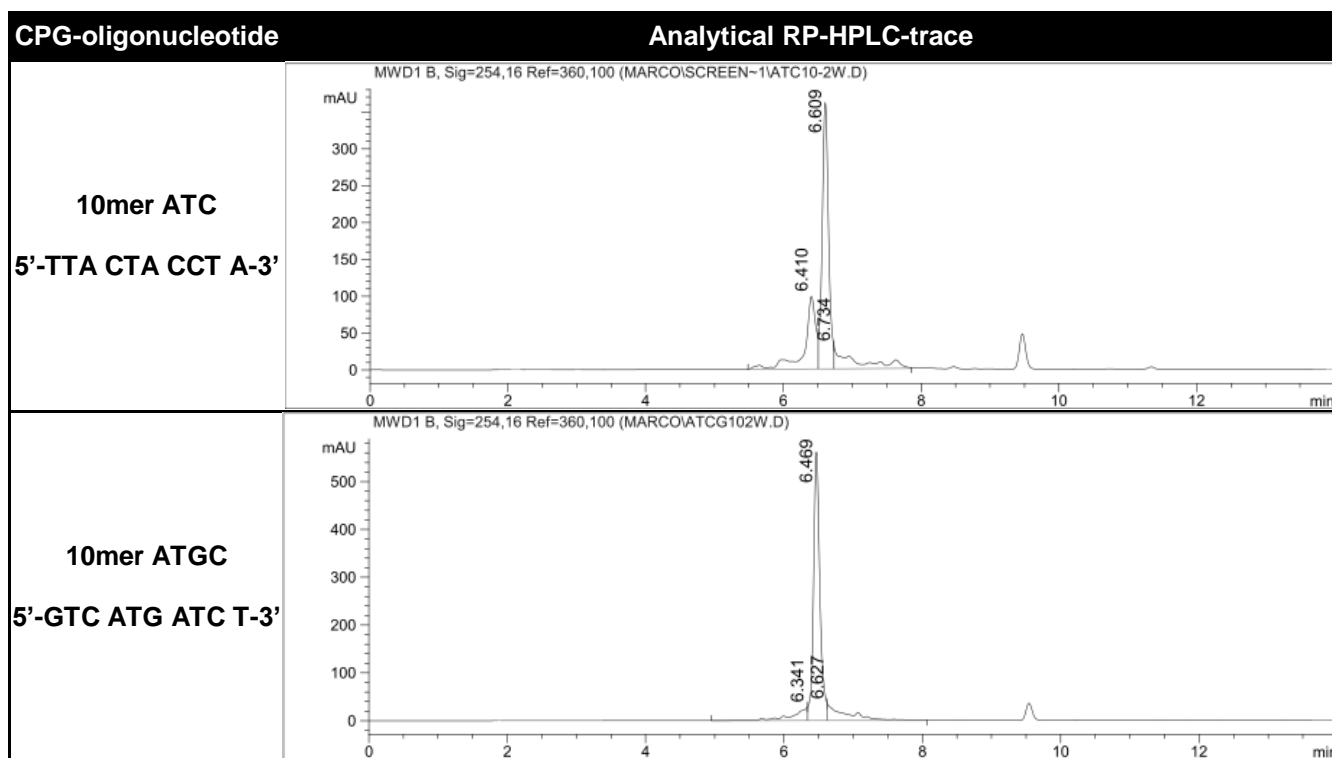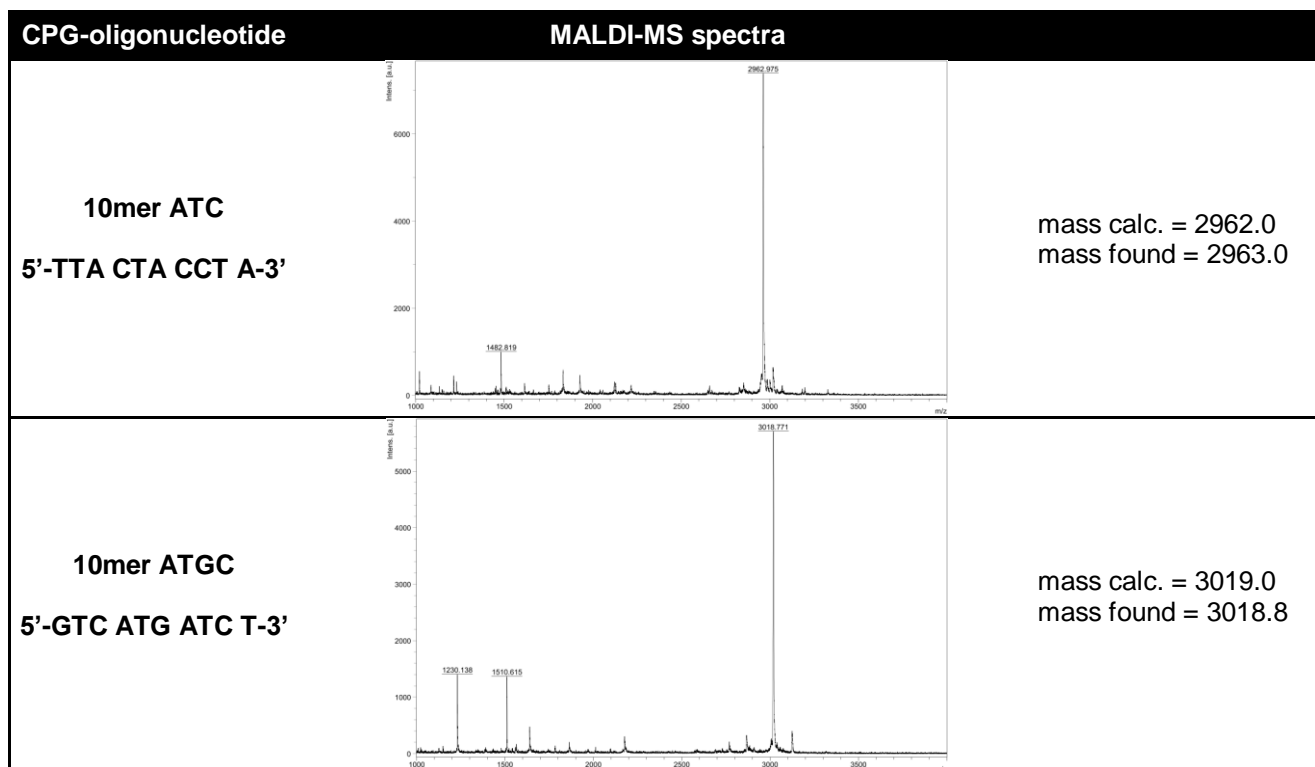

### CPG-oligonucleotide + BiBr<sub>3</sub>

According to the representative procedure (RP-03) solid support coupled oligonucleotide (20 nmol) was treated with BiBr<sub>3</sub> (200 equiv., 4 μmol) in HPLC-grade ACN.

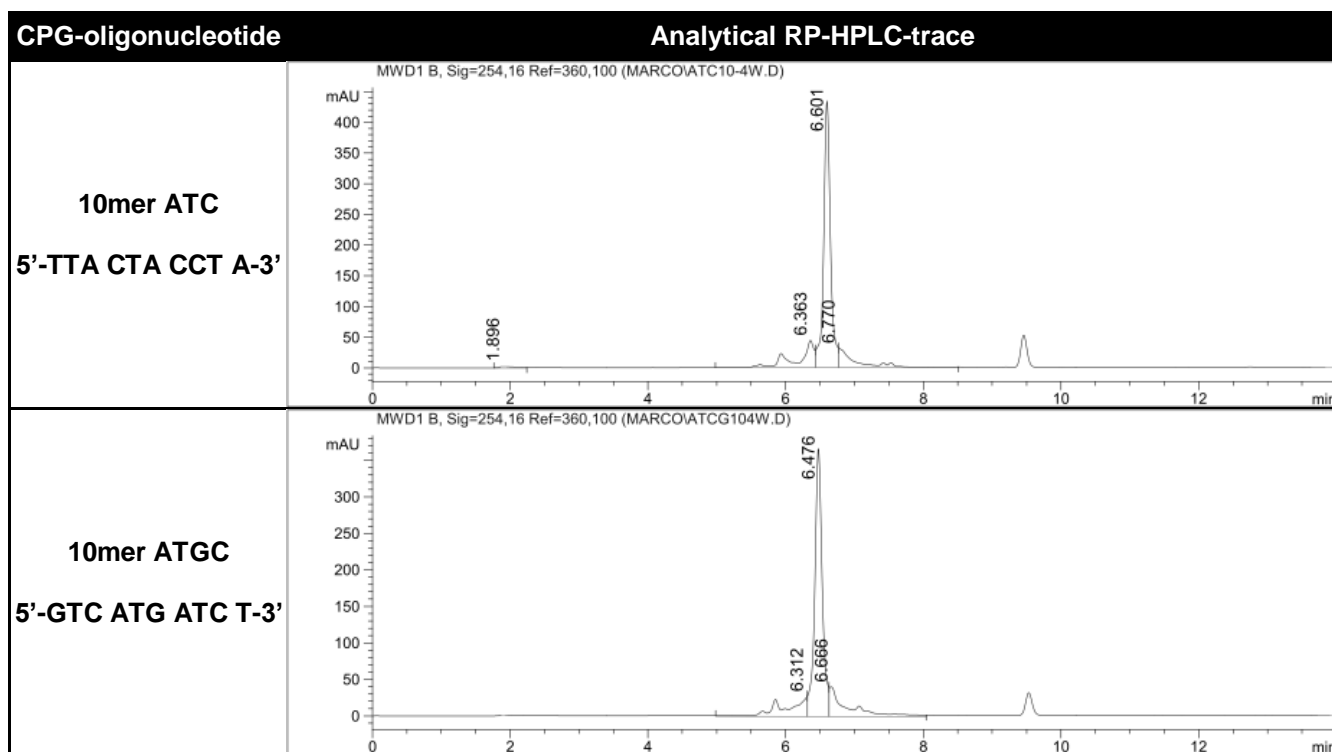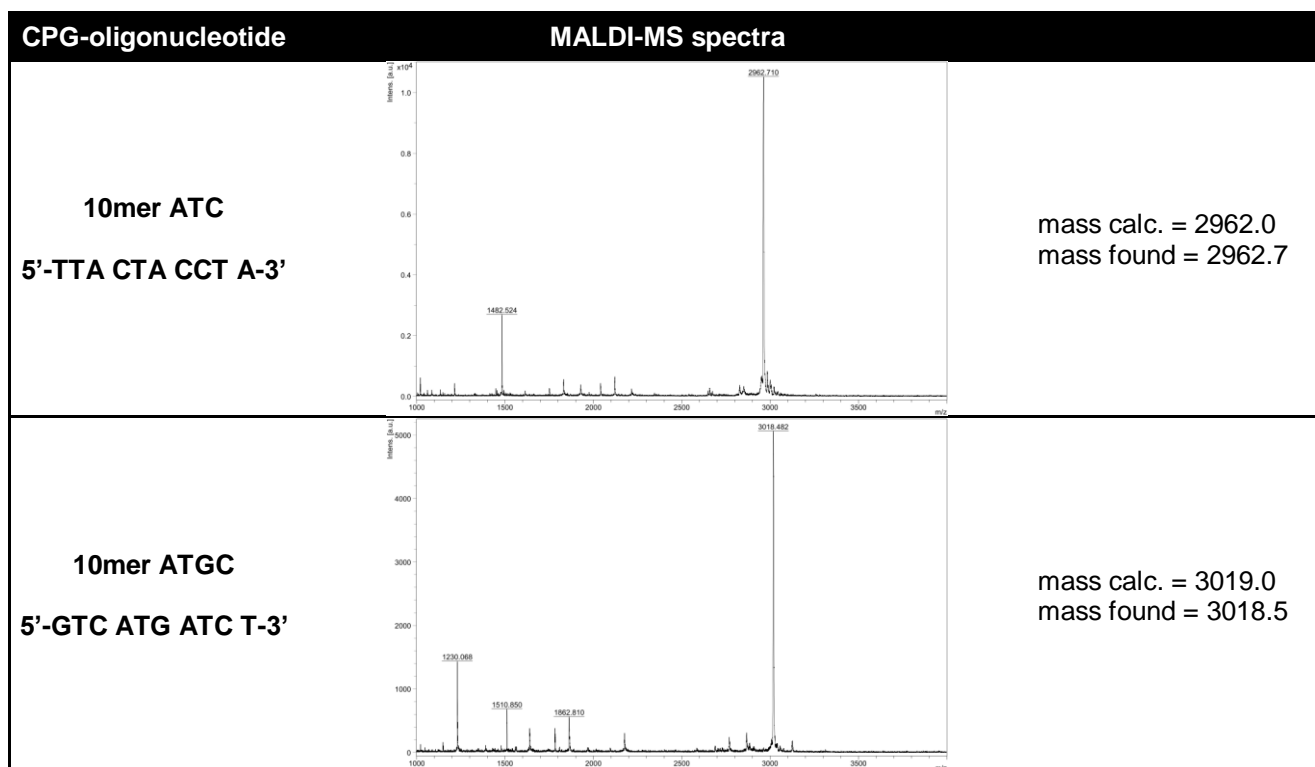

### CPG-oligonucleotide + InCl<sub>3</sub>

According to the representative procedure (RP-03) solid support coupled oligonucleotide (20 nmol) was treated with InCl<sub>3</sub> (200 equiv., 4 μmol) in HPLC-grade ACN.

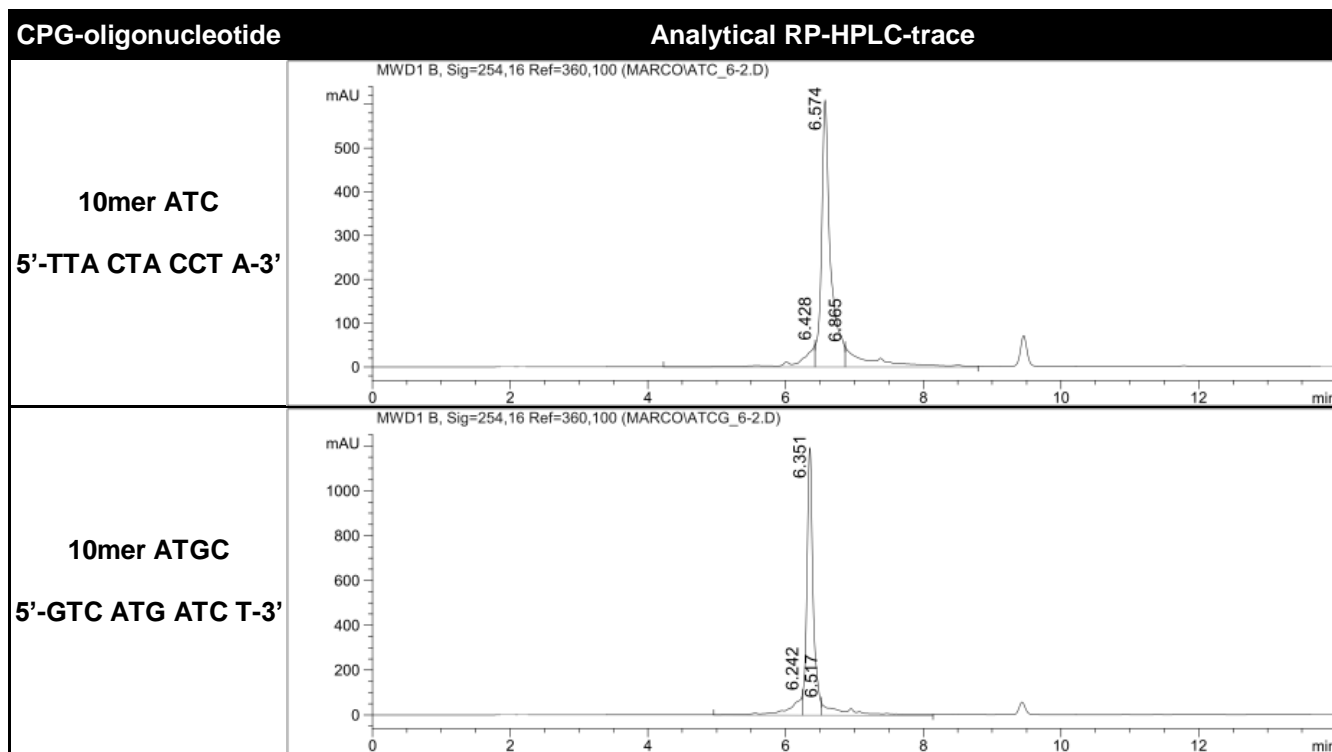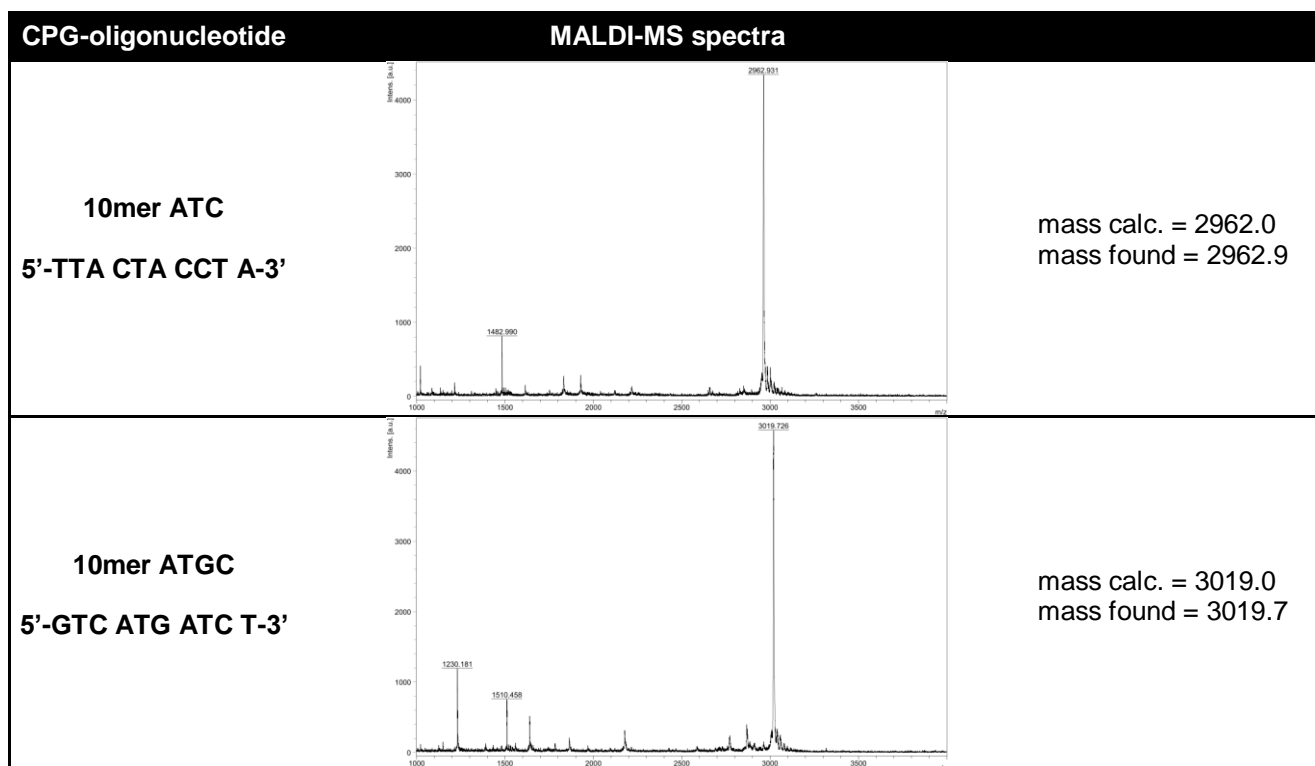

## CPG-oligonucleotide + LiBr

According to the representative procedure (RP-03) solid support coupled oligonucleotide (20 nmol) was treated with LiBr (200 equiv., 4  $\mu$ mol) in HPLC-grade ACN.

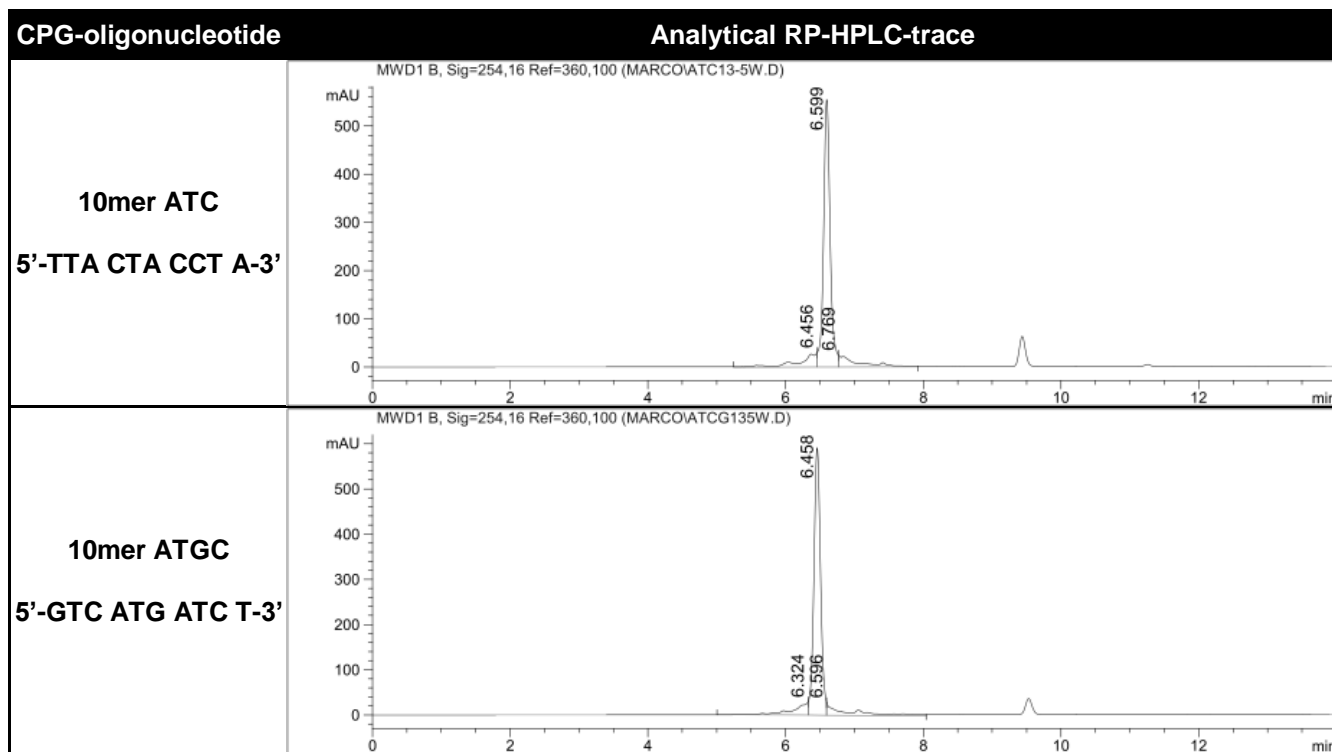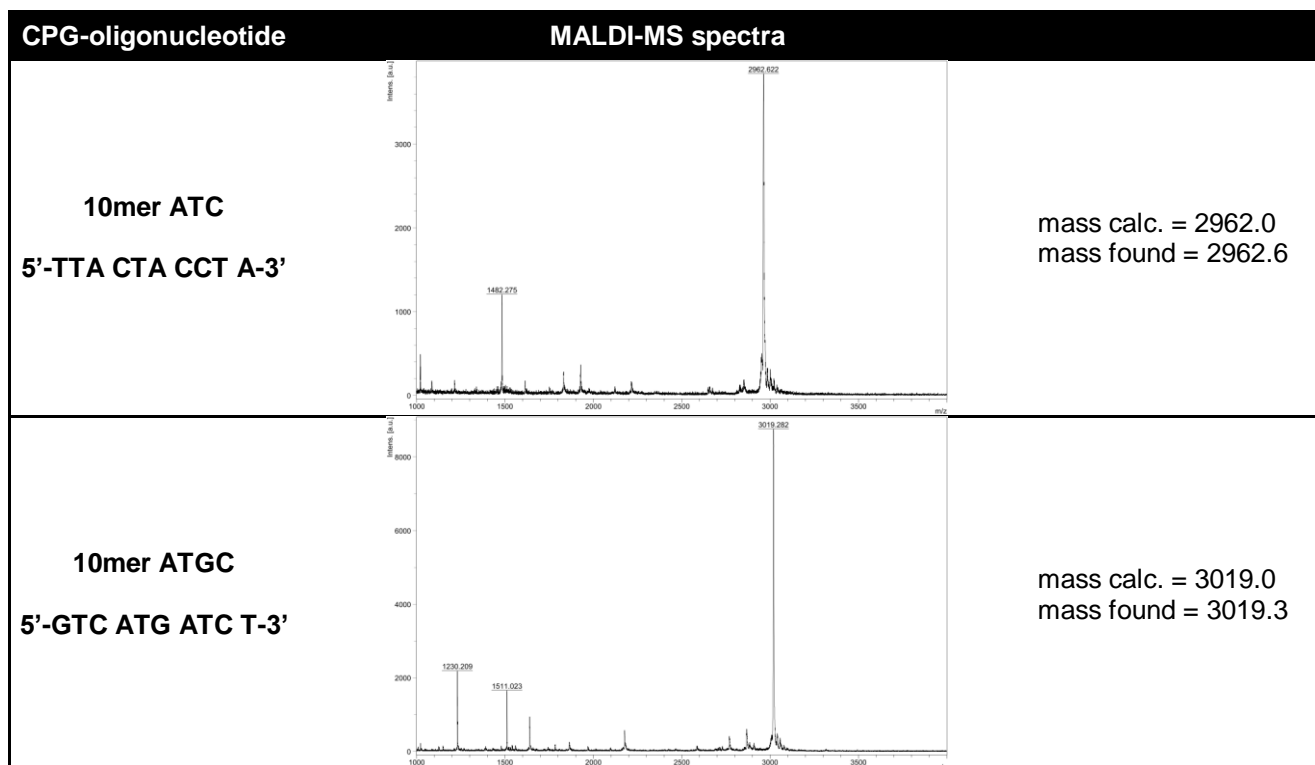

## CPG-oligonucleotide + Ni(acac)<sub>2</sub>

According to the representative procedure (RP-03) solid support coupled oligonucleotide (20 nmol) was treated with Ni(acac)<sub>2</sub> (200 equiv., 4 μmol) in HPLC-grade ACN.

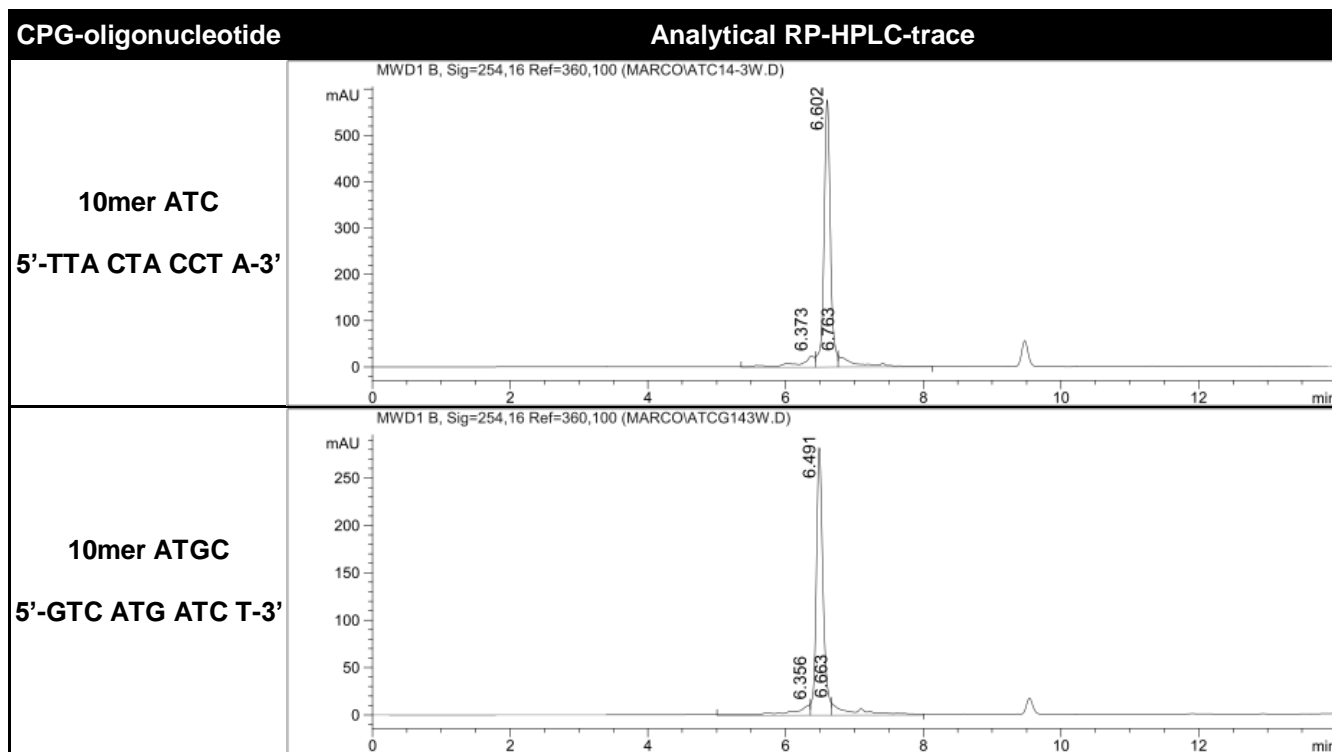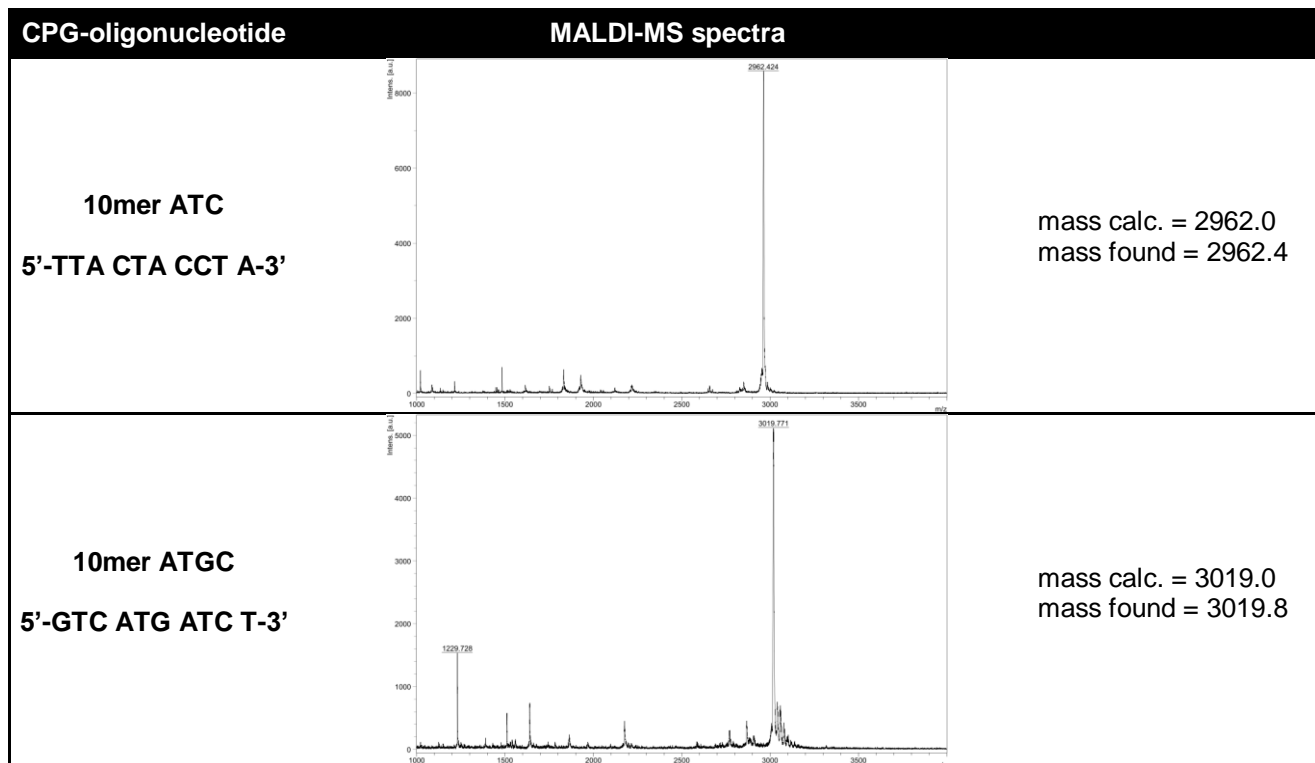

### CPG-oligonucleotide + Yb(OTf)<sub>3</sub>

According to the representative procedure (RP-03) solid support coupled oligonucleotide (20 nmol) was treated with Yb(OTf)<sub>3</sub> (200 equiv., 4 μmol) in HPLC-grade MeOH.

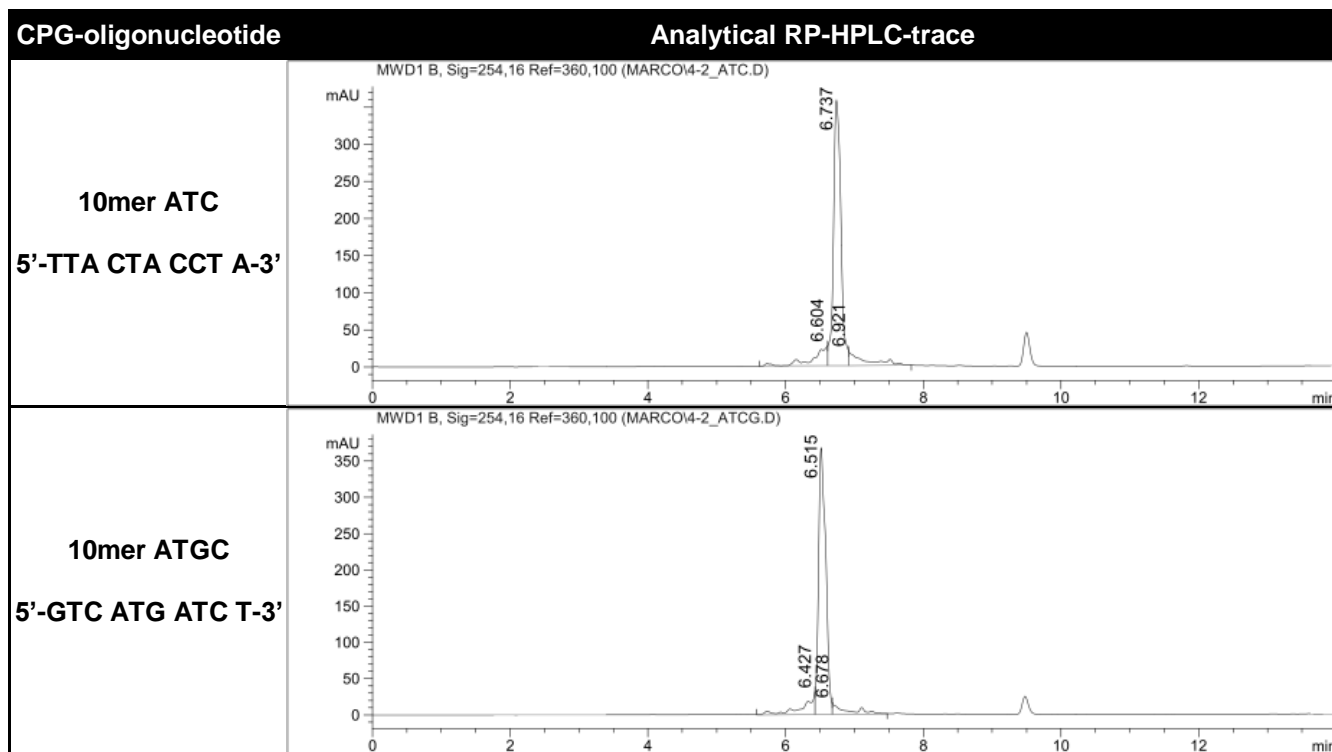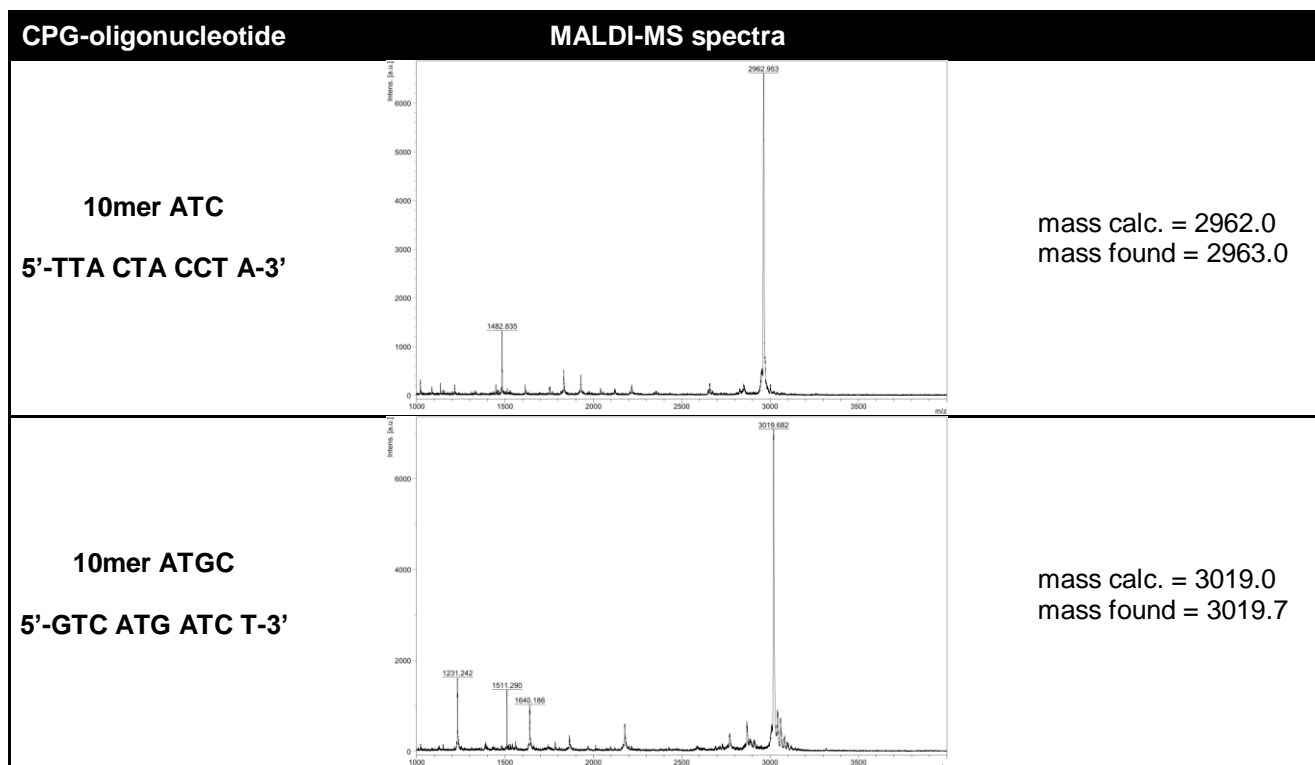

**Table S4** – Stability of DNA against organocatalysts and organic reagents<sup>a</sup>

| Entry <sup>[a]</sup> | Organo Catalyst                                                                     | No. | Solvent | hexT | TC | ATC | ATCG |
|----------------------|-------------------------------------------------------------------------------------|-----|---------|------|----|-----|------|
| 1                    | 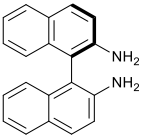   | I   | MeOH    |      |    |     |      |
| 2                    |    | J   | ACN     |      |    |     |      |
| 3                    |    | A   | MeOH    |      |    |     |      |
| 4                    |    | K   | MeOH    |      |    |     |      |
| 5                    |   | B   | MeOH    |      |    |     |      |
| 6                    |  | C   | MeOH    |      |    |     |      |
| 7                    |  | L   | MeOH    |      |    |     |      |

|    |                                                                                     |   |      |  |  |  |  |
|----|-------------------------------------------------------------------------------------|---|------|--|--|--|--|
| 8  | 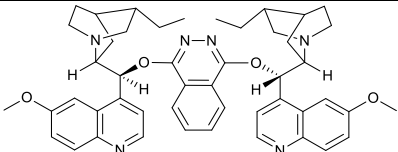   | M | MeOH |  |  |  |  |
| 9  |    | D | ACN  |  |  |  |  |
| 10 |    | N | ACN  |  |  |  |  |
| 11 |    | E | MeOH |  |  |  |  |
| 12 |    | O | MeOH |  |  |  |  |
| 13 |   | P | MeOH |  |  |  |  |
| 14 |  | Q | ACN  |  |  |  |  |
| 15 |  | R | MeOH |  |  |  |  |



|    |                                                                                   |   |      |  |  |  |  |
|----|-----------------------------------------------------------------------------------|---|------|--|--|--|--|
| 16 | 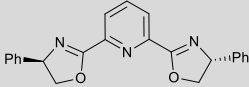 | F | ACN  |  |  |  |  |
| 17 |  | S | MeOH |  |  |  |  |
| 18 |  | T | EtOH |  |  |  |  |
| 19 |  | G | ACN  |  |  |  |  |
| 20 |  | H | ACN  |  |  |  |  |

<sup>a</sup> for each: 20 nmol DNA, 200 eq. organo catalyst, 50  $\mu$ L solvent, r.t., 22 h; EtOH = ethanol, ACN = acetonitrile, MeOH = methanol.

|       |        |        |       |                 |
|-------|--------|--------|-------|-----------------|
|       |        |        |       | DNA degradation |
| 0-20% | 21-40% | 41-60% | > 61% |                 |

## HPLC traces and MALDI-MS spectra of organocatalyst and organic reagents screens

### CPG-oligonucleotide + (*R*)-(+)-DABN I

According to the representative procedure (RP-04) solid support coupled oligonucleotide (20 nmol) was treated with (*R*)-(+)-DABN I (200 equiv., 4  $\mu$ mol) in dry MeOH.

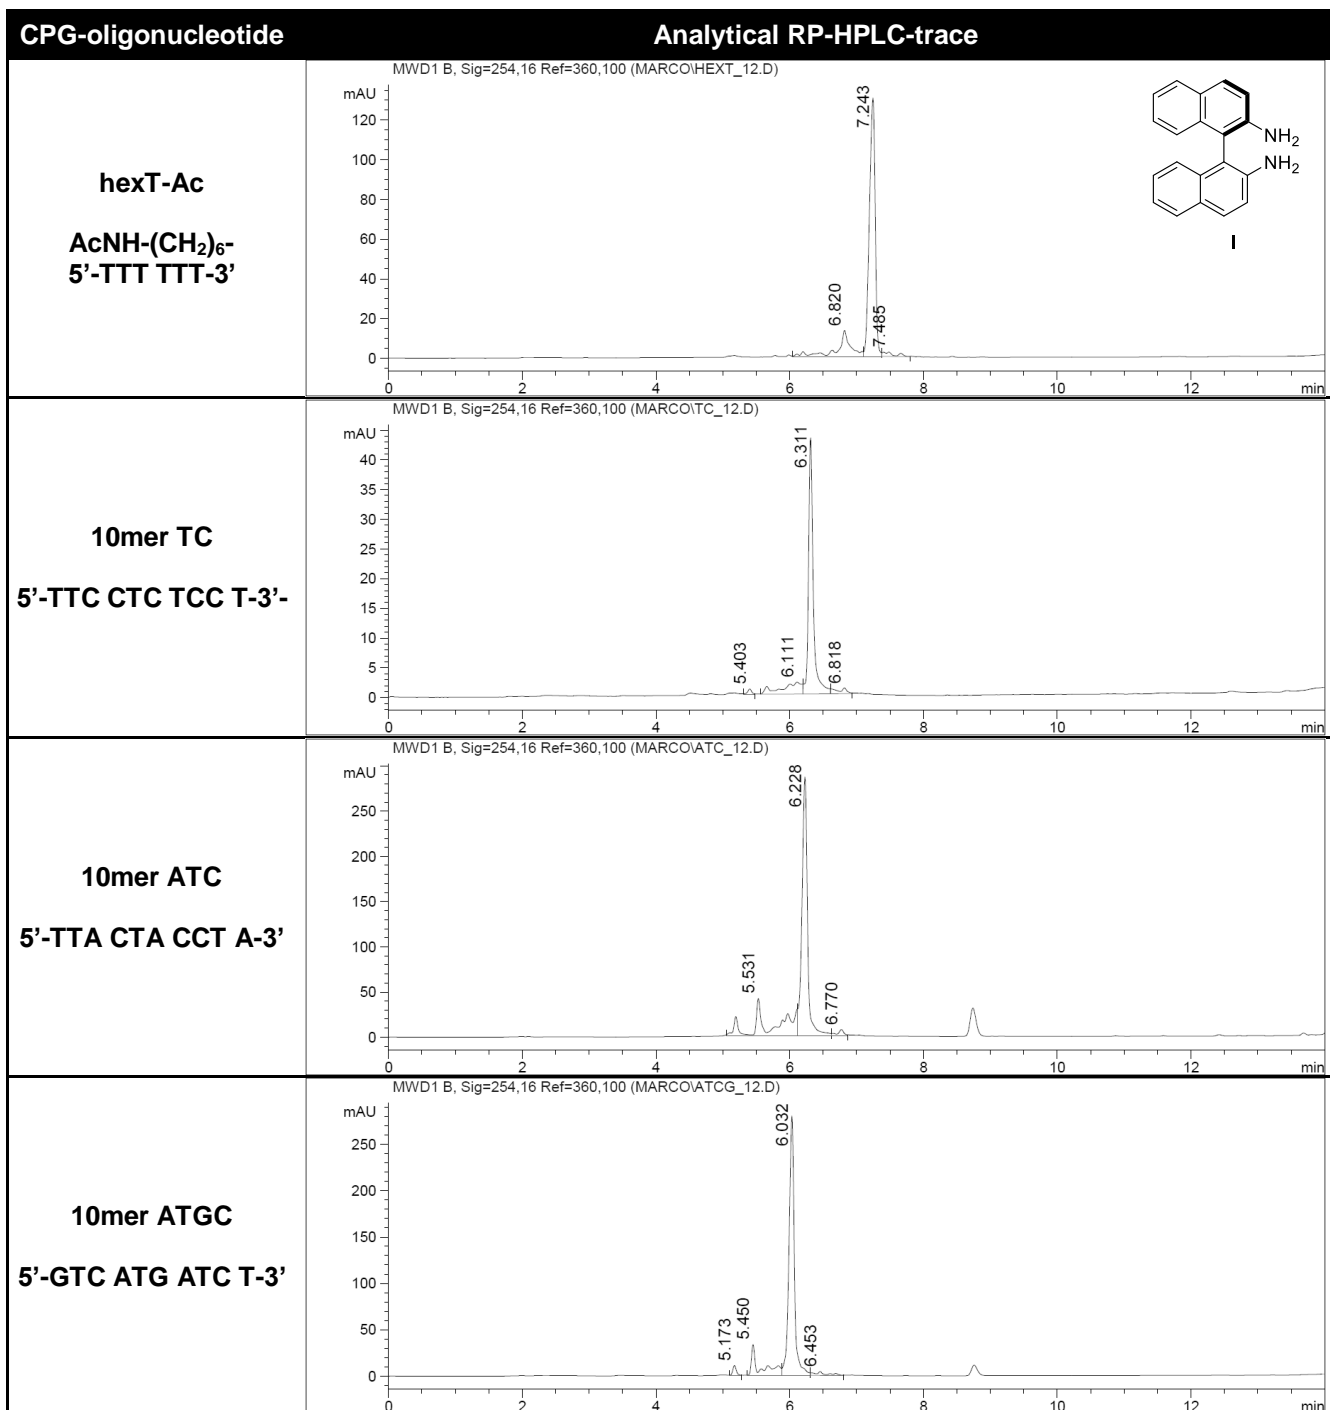

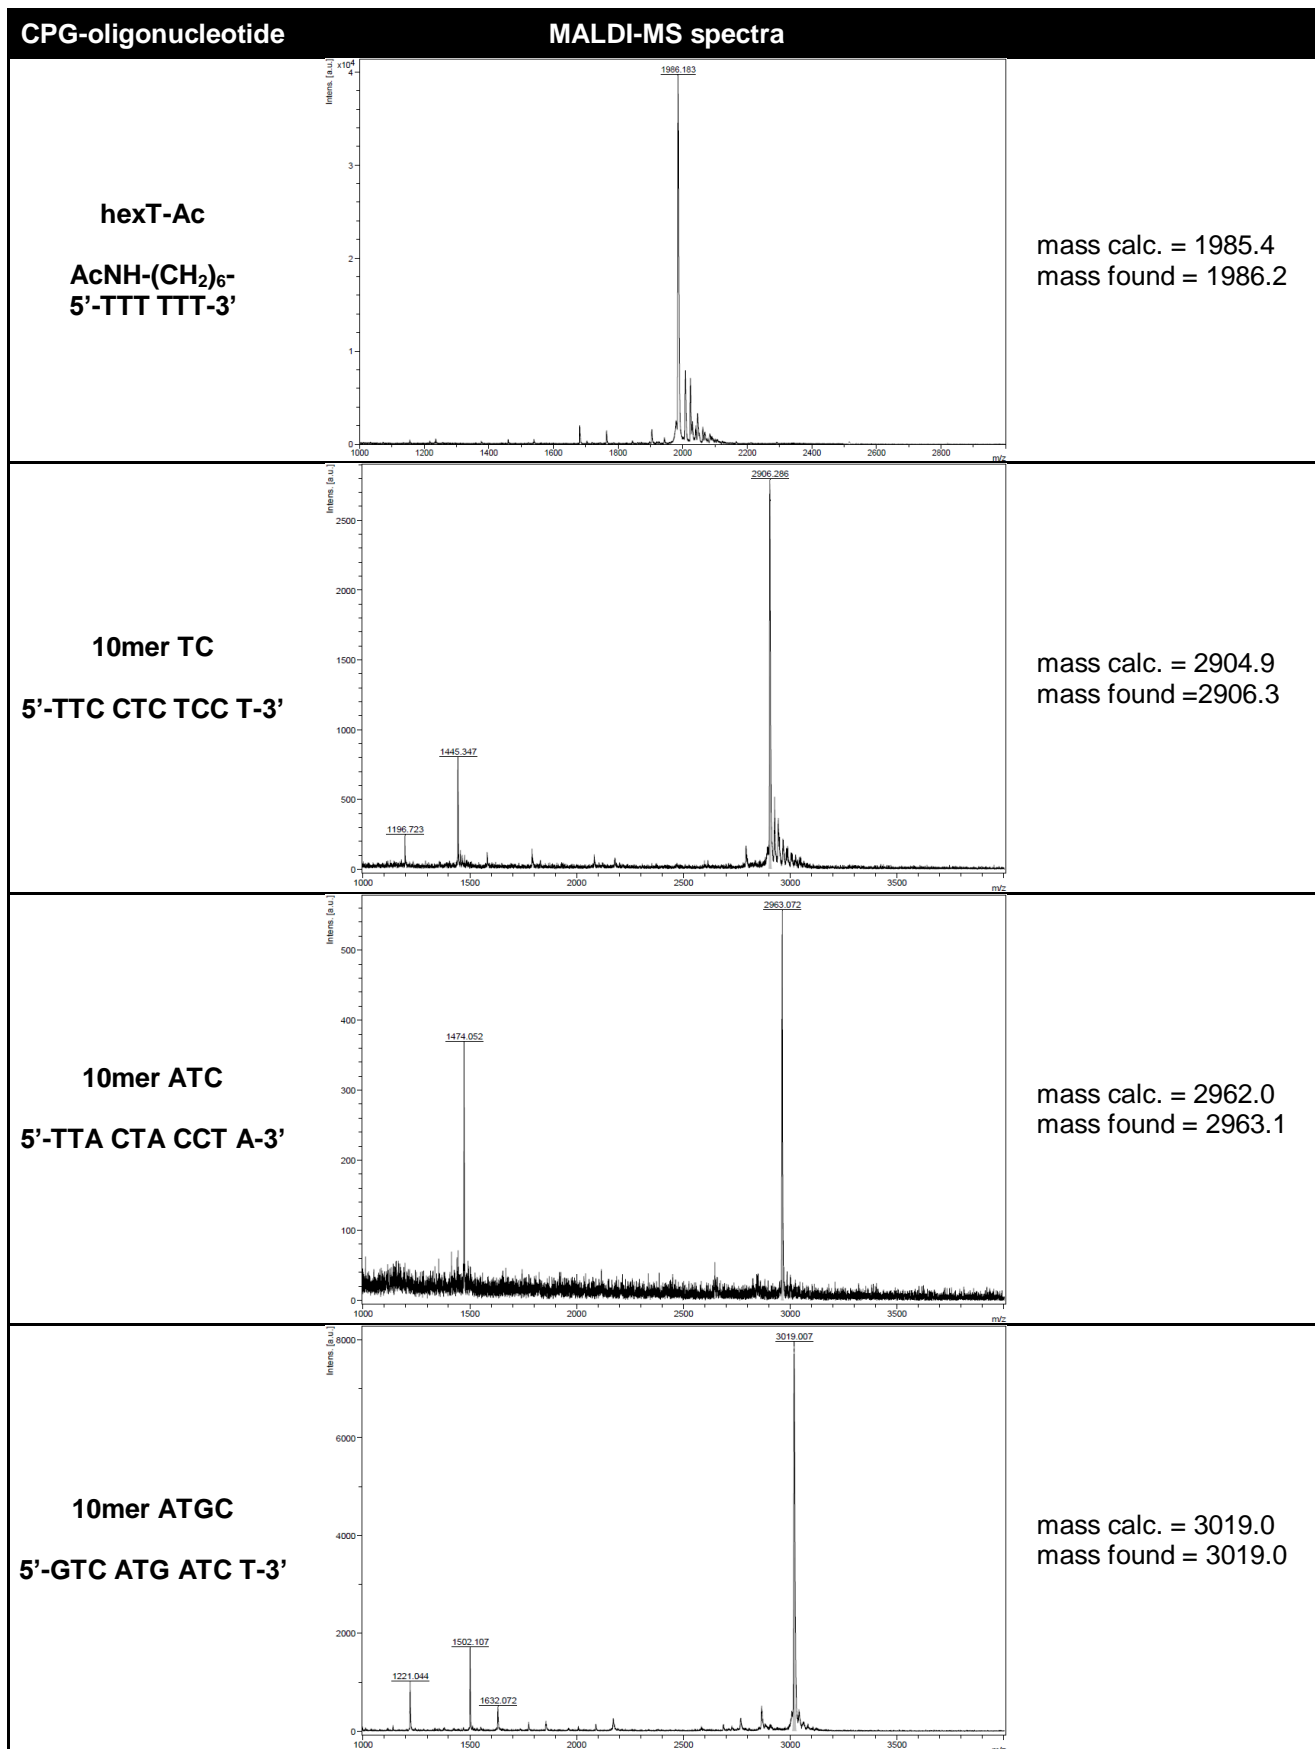

## CPG-oligonucleotide + (*R*)-BINOL J

According to the representative procedure (RP-04) solid support coupled oligonucleotide (20 nmol) was treated with ((*R*)-BINOL J (200 equiv., 4  $\mu$ mol) in dry ACN.

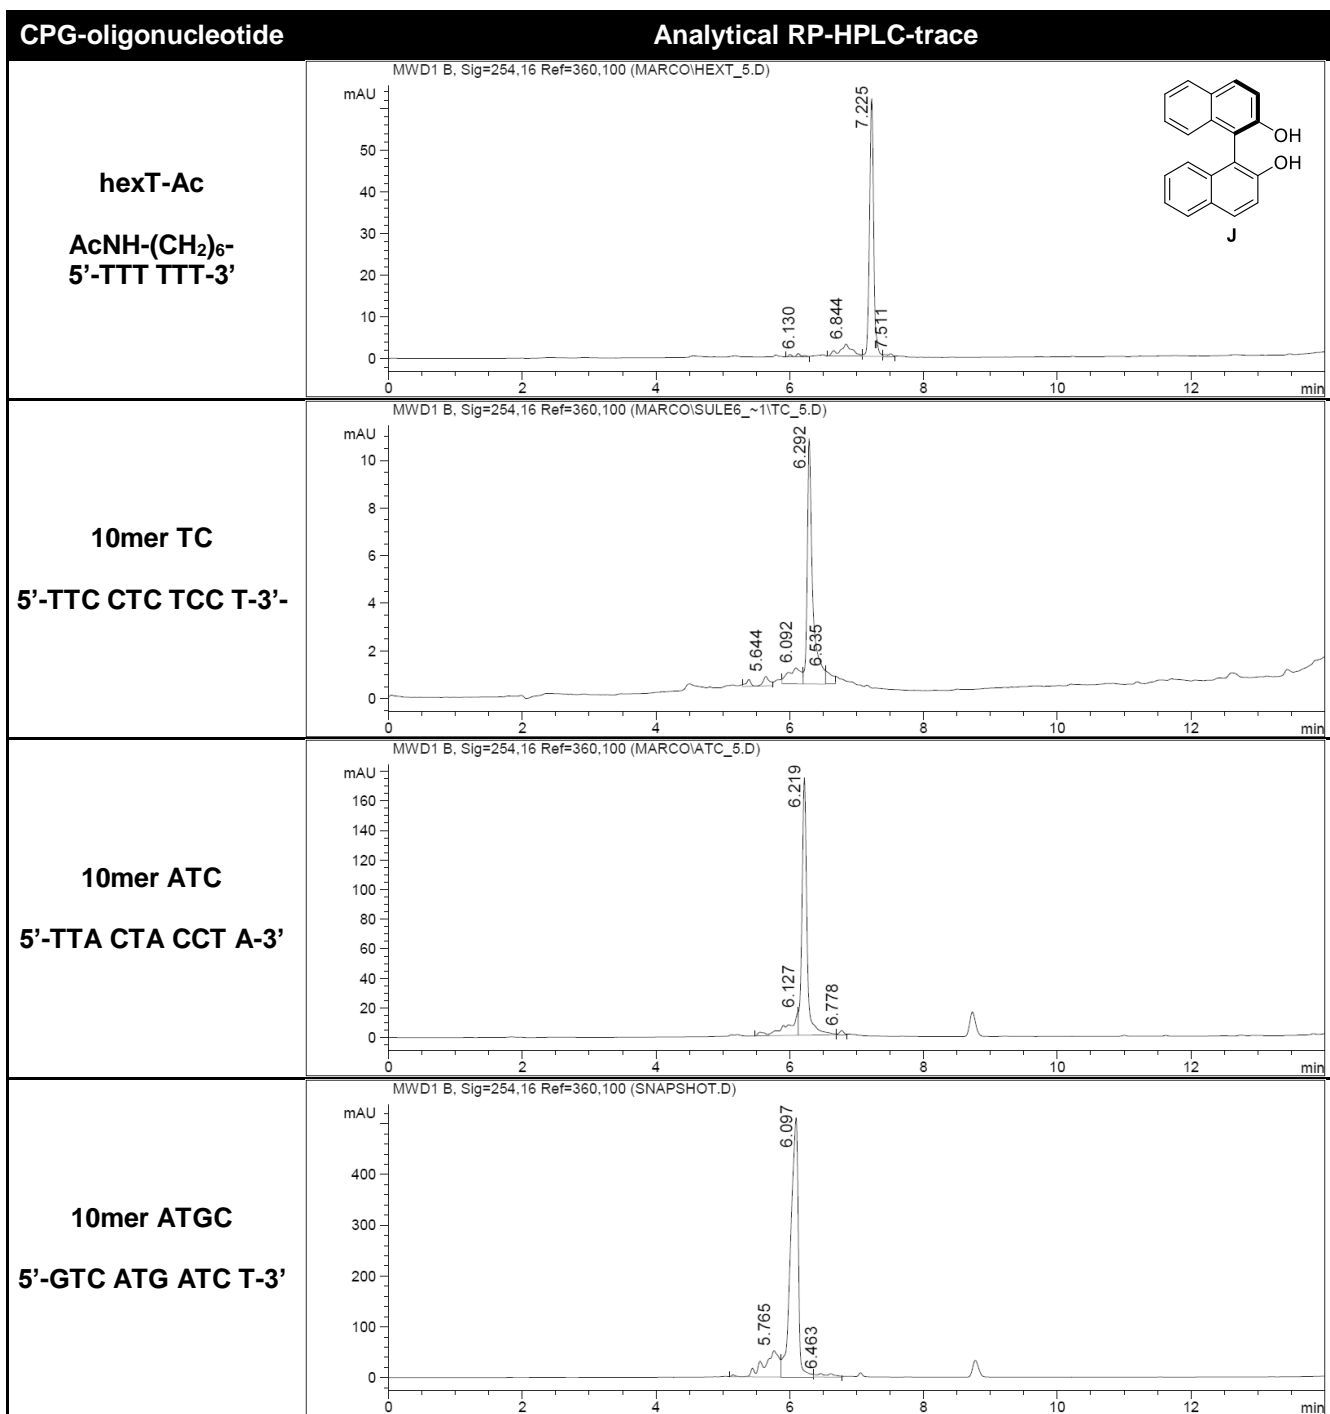

| CPG-oligonucleotide                                                                             | MALDI-MS spectra                                                                                                                                 |                                                    |
|-------------------------------------------------------------------------------------------------|--------------------------------------------------------------------------------------------------------------------------------------------------|----------------------------------------------------|
| <p><b>hexT-Ac</b></p> <p><b>AcNH-(CH<sub>2</sub>)<sub>6</sub>-</b><br/><b>5'-TTT TTT-3'</b></p> | 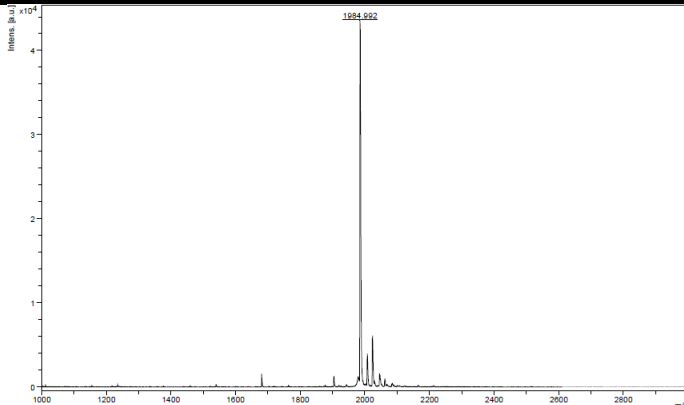 <p>Intensity [a.u.] <math>\times 10^4</math></p> <p>m/z</p>   | <p>mass calc. = 1985.4<br/>mass found = 1985.0</p> |
| <p><b>10mer TC</b></p> <p><b>5'-TTC CTC TCC T-3'</b></p>                                        |  <p>Intensity [a.u.] <math>\times 10^4</math></p> <p>m/z</p>  | <p>mass calc. = 2904.9<br/>mass found = 2904.4</p> |
| <p><b>10mer ATC</b></p> <p><b>5'-TTA CTA CCT A-3'</b></p>                                       |  <p>Intensity [a.u.] <math>\times 10^4</math></p> <p>m/z</p> | <p>mass calc. = 2962.0<br/>mass found = 2960.6</p> |
| <p><b>10mer ATGC</b></p> <p><b>5'-GTC ATG ATC T-3'</b></p>                                      |  <p>Intensity [a.u.] <math>\times 10^4</math></p> <p>m/z</p> | <p>mass calc. = 3019.0<br/>mass found = 3018.6</p> |

## CPG-oligonucleotide + (*R*)-1,1-Binaphthyl-2,2-diyl hydrogenphosphate **A**

According to the representative procedure (RP-04) solid support coupled oligonucleotide (20 nmol) was treated with (*R*)-1,1-Binaphthyl-2,2-diyl hydrogenphosphate **A** (200 equiv., 4  $\mu$ mol) in dry MeOH.

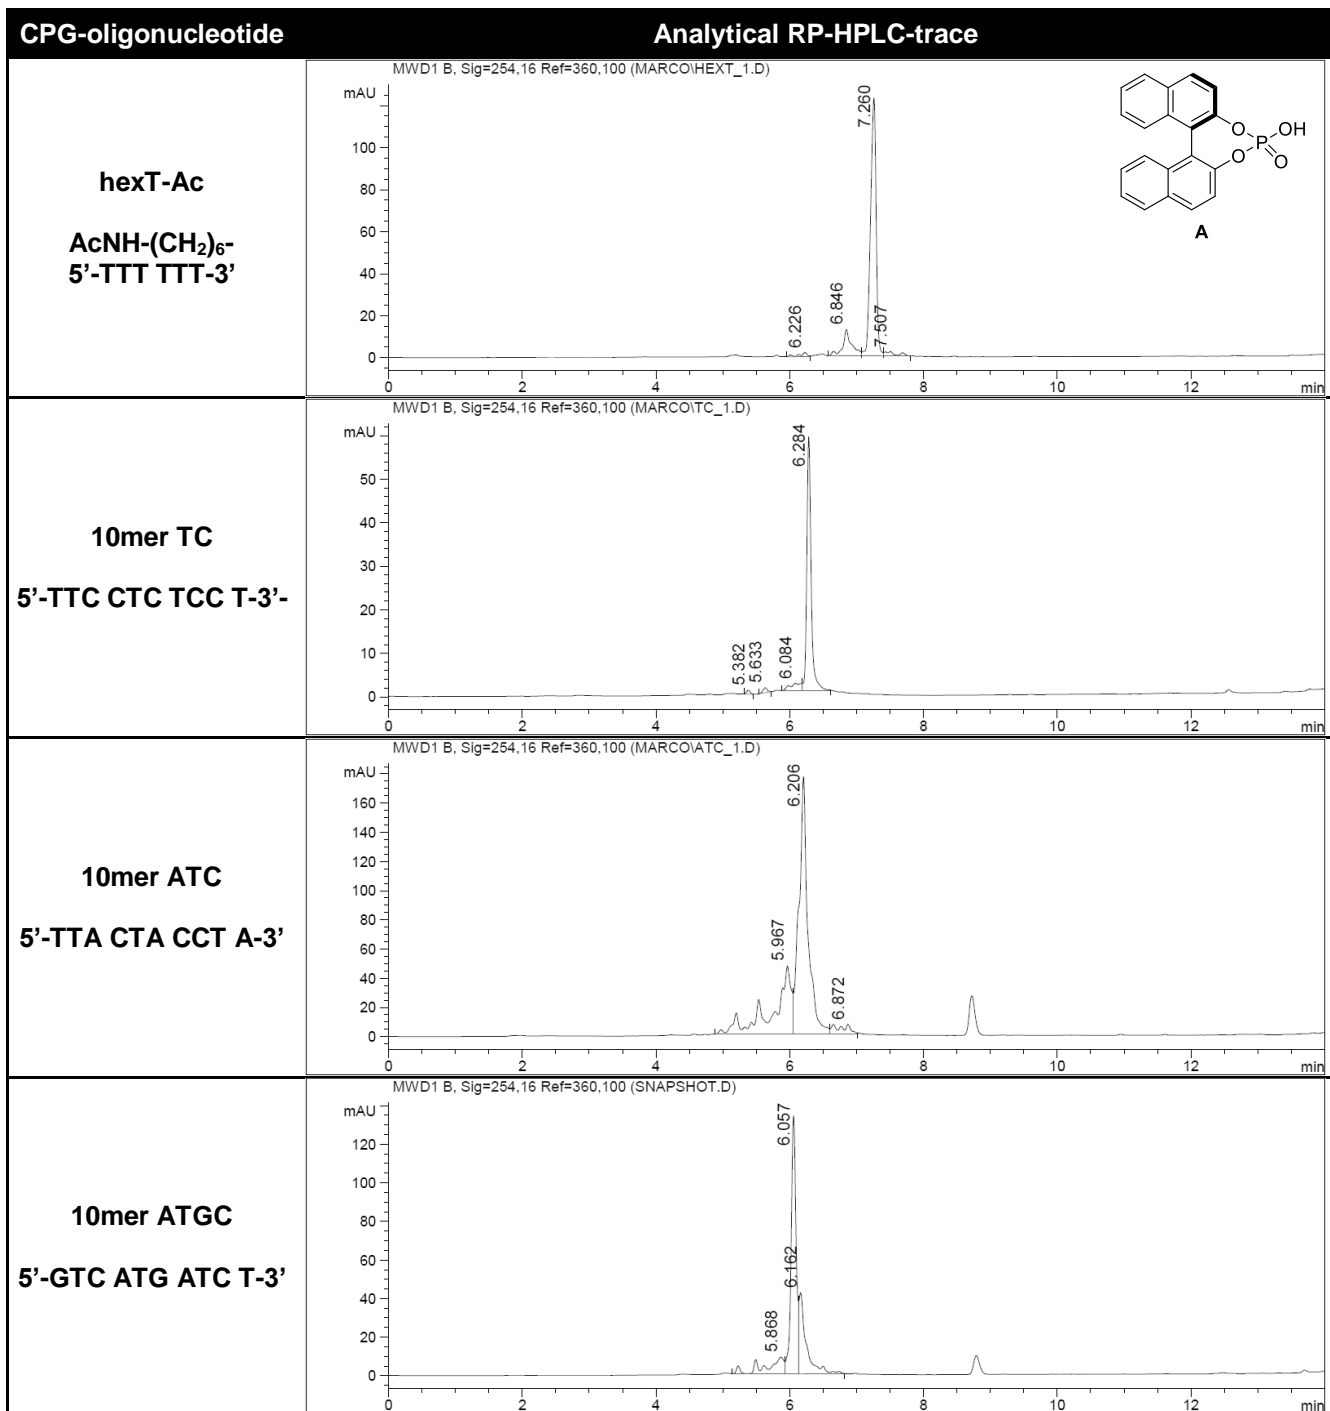

| CPG-oligonucleotide                                                                             | MALDI-MS spectra                                                                                                                                                                                                                                                                                             |                                                    |
|-------------------------------------------------------------------------------------------------|--------------------------------------------------------------------------------------------------------------------------------------------------------------------------------------------------------------------------------------------------------------------------------------------------------------|----------------------------------------------------|
| <p><b>hexT-Ac</b></p> <p><b>AcNH-(CH<sub>2</sub>)<sub>6</sub>-</b><br/><b>5'-TTT TTT-3'</b></p> | 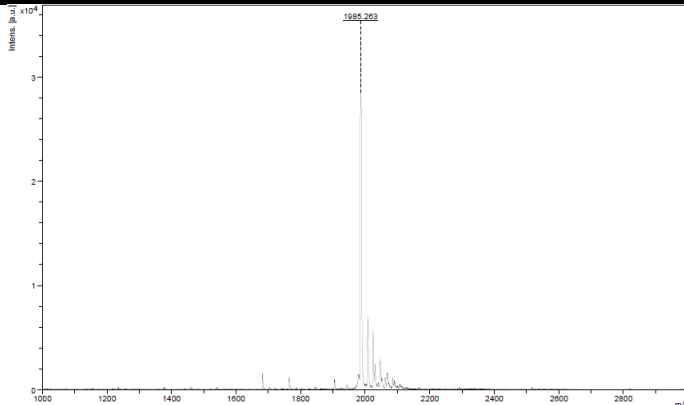 <p>Intensity [a.u.] vs m/z. The x-axis ranges from 1000 to 2800 m/z. The y-axis ranges from 0 to 3 x 10<sup>4</sup>. A single sharp peak is labeled at 1985.263.</p>                                                      | <p>mass calc. = 1985.4<br/>mass found = 1985.3</p> |
| <p><b>10mer TC</b></p> <p><b>5'-TTC CTC TCC T-3'</b></p>                                        |  <p>Intensity [a.u.] vs m/z. The x-axis ranges from 1000 to 3500 m/z. The y-axis ranges from 0 to 4000. Major peaks are labeled at 1195.528, 1445.035, and 2905.444.</p>                                                  | <p>mass calc. = 2904.9<br/>mass found = 2905.4</p> |
| <p><b>10mer ATC</b></p> <p><b>5'-TTA CTA CCT A-3'</b></p>                                       |  <p>Intensity [a.u.] vs m/z. The x-axis ranges from 1000 to 3500 m/z. The y-axis ranges from 0 to 1200. Major peaks are labeled at 1473.901 and 2963.429.</p>                                                            | <p>mass calc. = 2962.0<br/>mass found = 2963.4</p> |
| <p><b>10mer ATGC</b></p> <p><b>5'-GTC ATG ATC T-3'</b></p>                                      |  <p>Intensity [a.u.] vs m/z. The x-axis ranges from 1000 to 3500 m/z. The y-axis ranges from 0.0 to 1.2 x 10<sup>4</sup>. Major peaks are labeled at 1220.079, 1501.420, 1631.589, 2780.008, 2887.349, and 3019.991.</p> | <p>mass calc. = 3019.0<br/>mass found = 3019.3</p> |

## CPG-oligonucleotide + (±)-BINAP K

According to the representative procedure (RP-04) solid support coupled oligonucleotide (20 nmol) was treated with (±)-BINAP K (200 equiv., 4 μmol) in dry MeOH.

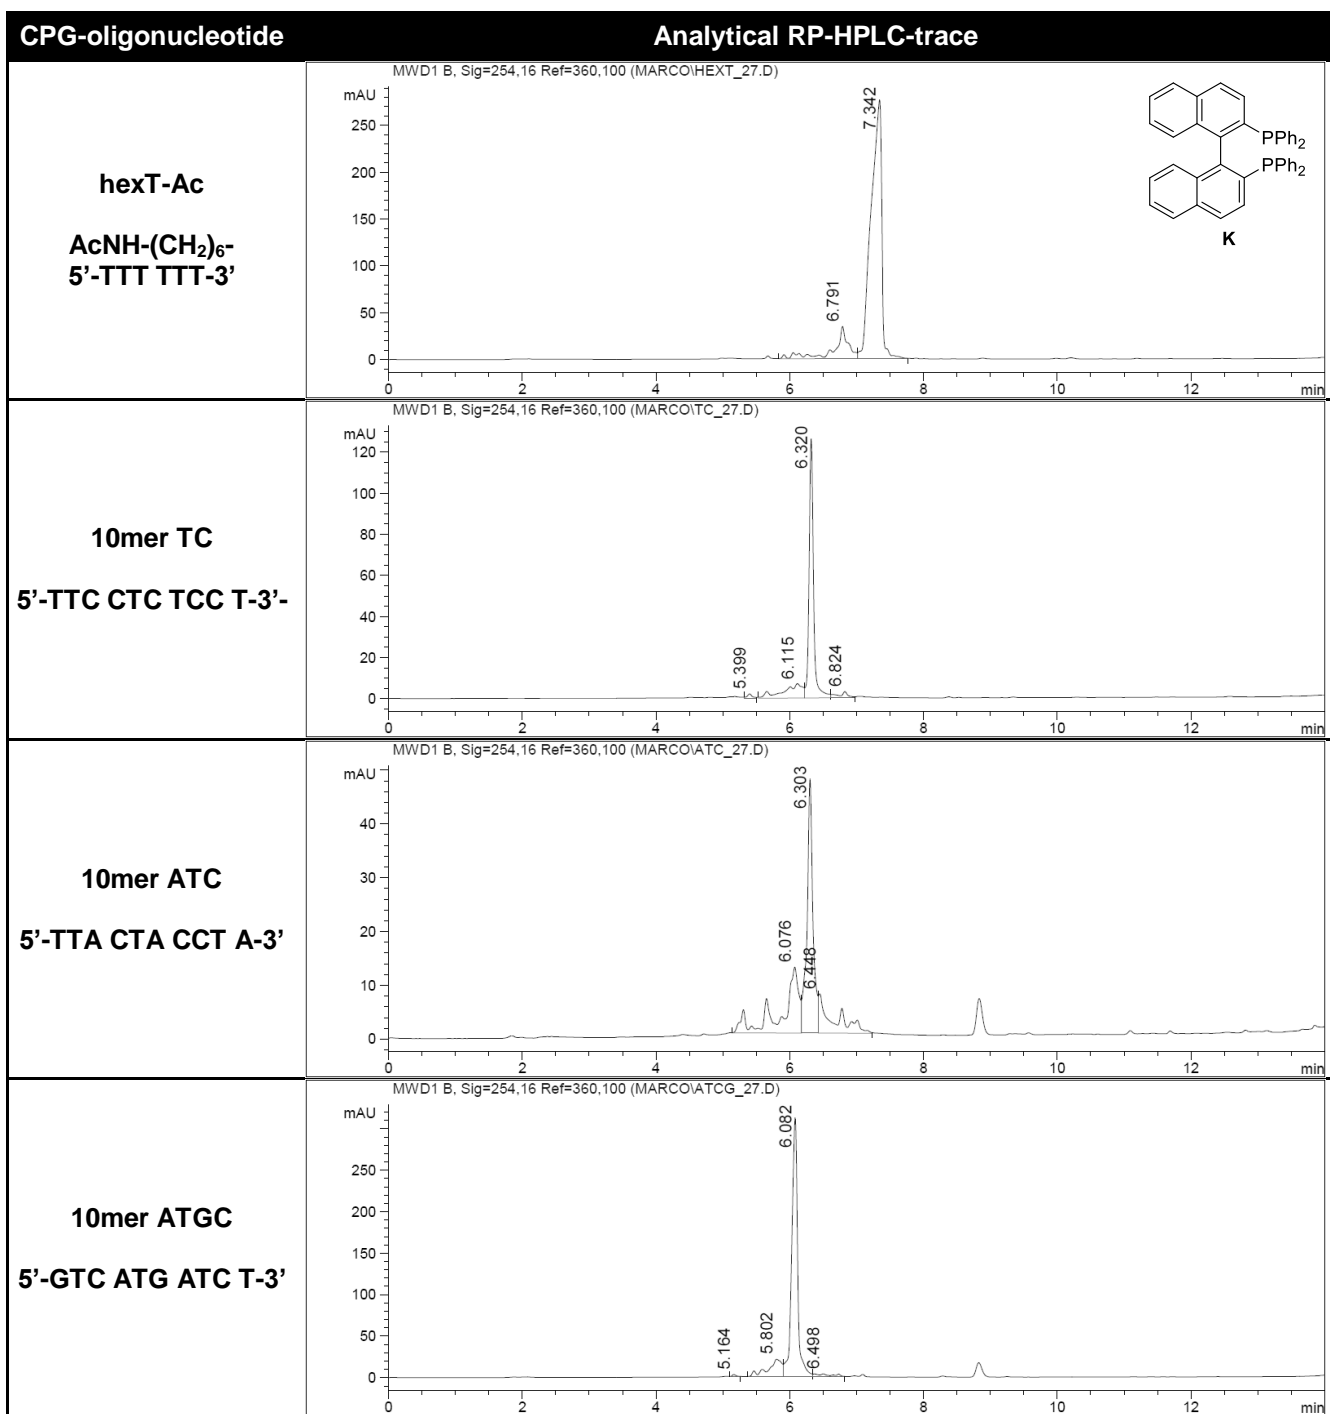



| CPG-oligonucleotide                                                                             | MALDI-MS spectra                                                                                                                                                                                                                                                                                                 |                                                    |
|-------------------------------------------------------------------------------------------------|------------------------------------------------------------------------------------------------------------------------------------------------------------------------------------------------------------------------------------------------------------------------------------------------------------------|----------------------------------------------------|
| <p><b>hexT-Ac</b></p> <p><b>AcNH-(CH<sub>2</sub>)<sub>6</sub>-</b><br/><b>5'-TTT TTT-3'</b></p> | 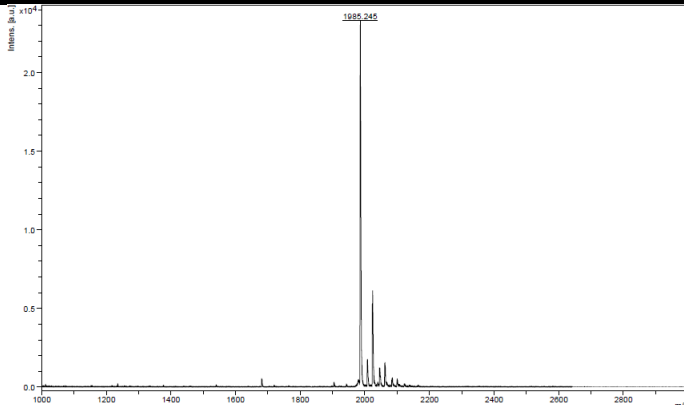 <p>Intensity [a.u.] vs m/z. The x-axis ranges from 1000 to 2800 m/z. The y-axis ranges from 0.0 to 2.0 x 10<sup>4</sup> a.u. A single sharp peak is labeled at m/z 1985.248.</p>                                              | <p>mass calc. = 1985.4<br/>mass found = 1985.2</p> |
| <p><b>10mer TC</b></p> <p><b>5'-TTC CTC TCC T-3'</b></p>                                        |  <p>Intensity [a.u.] vs m/z. The x-axis ranges from 1000 to 3500 m/z. The y-axis ranges from 0 to 4000 a.u. The base peak is at m/z 2905.714. Other labeled peaks include m/z 1195.761, 1444.957, 1582.711, and 1792.730.</p> | <p>mass calc. = 2904.9<br/>mass found = 2905.7</p> |
| <p><b>10mer ATC</b></p> <p><b>5'-TTA CTA CCT A-3'</b></p>                                       |  <p>Intensity [a.u.] vs m/z. The x-axis ranges from 1000 to 3500 m/z. The y-axis ranges from 0 to 1200 a.u. The base peak is at m/z 2962.981. Other labeled peaks include m/z 1205.940, 1473.943, and 1825.713.</p>          | <p>mass calc. = 2962.0<br/>mass found = 2963.0</p> |
| <p><b>10mer ATGC</b></p> <p><b>5'-GTC ATG ATC T-3'</b></p>                                      |  <p>Intensity [a.u.] vs m/z. The x-axis ranges from 1000 to 3500 m/z. The y-axis ranges from 0 to 5000 a.u. The base peak is at m/z 3019.842. Other labeled peaks include m/z 1221.128 and 1502.327.</p>                     | <p>mass calc. = 3019.0<br/>mass found = 3019.8</p> |

## CPG-oligonucleotide + TADDOL B

According to the representative procedure (RP-04) solid support coupled oligonucleotide (20 nmol) was treated with TADDOL **B** (200 equiv., 4  $\mu$ mol) in dry MeOH.

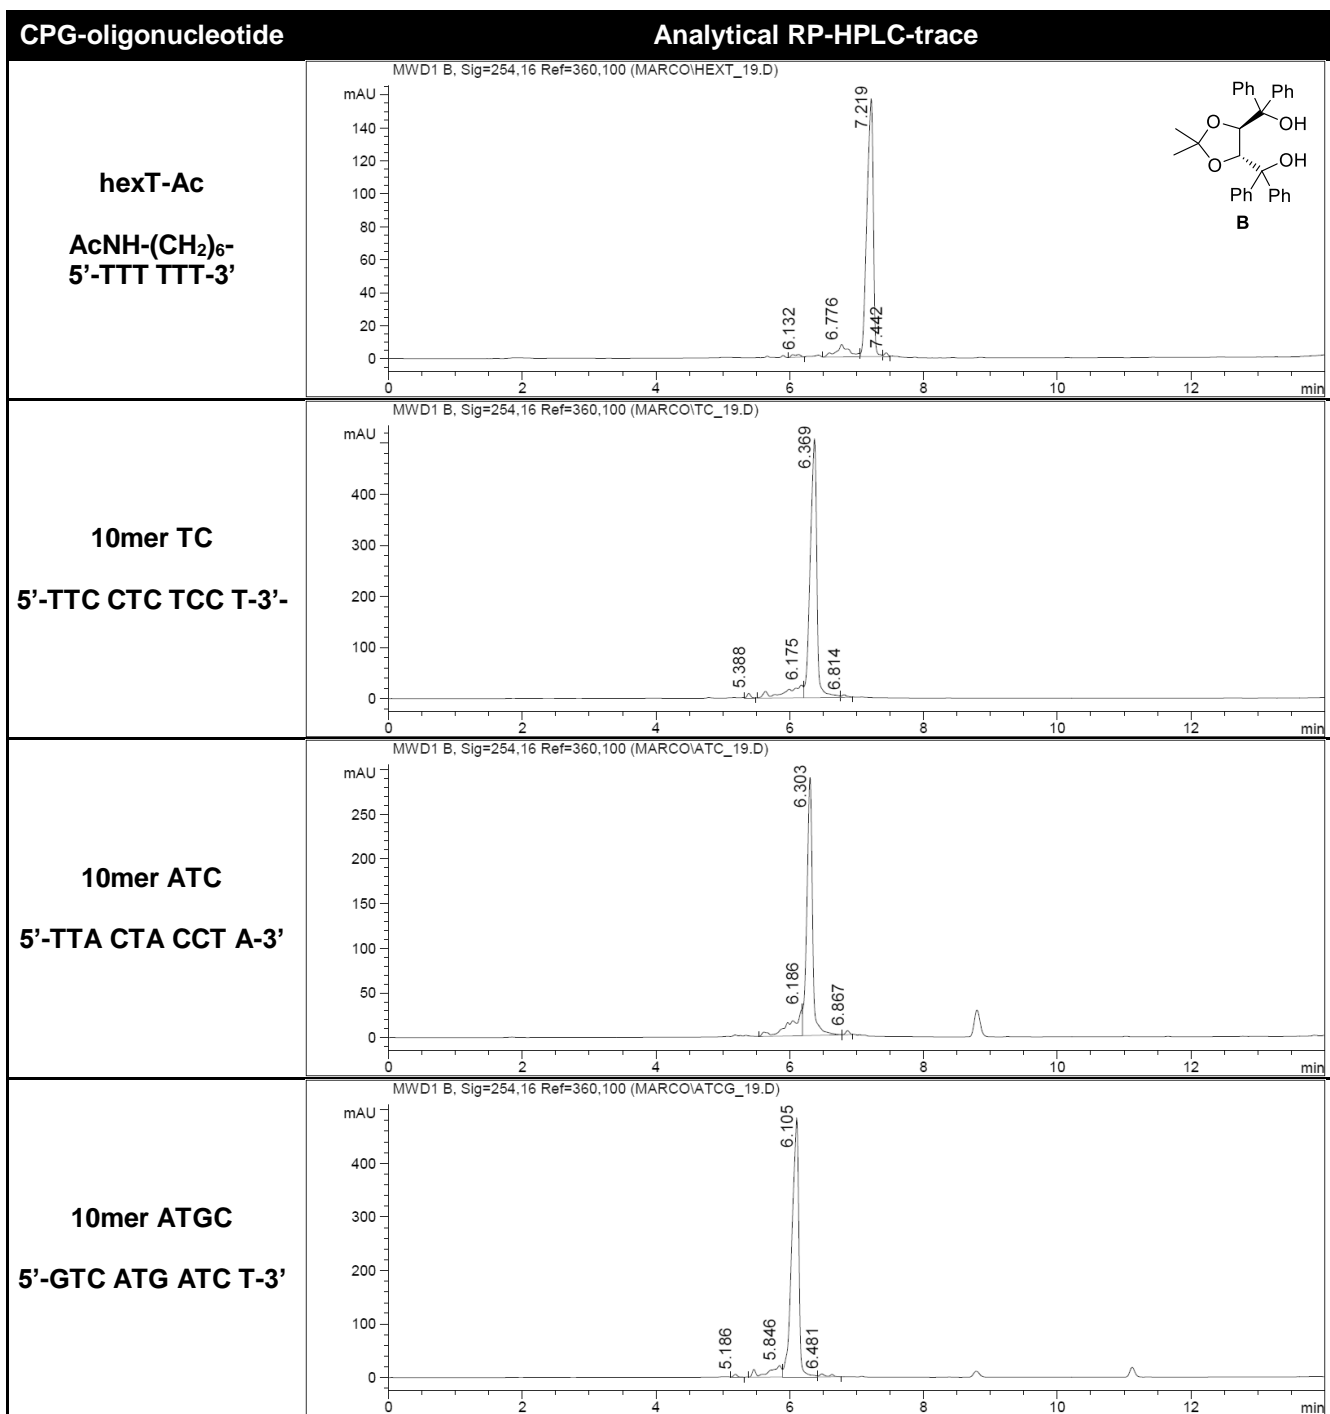

| CPG-oligonucleotide                                                                             | MALDI-MS spectra                                                                     |                                                    |
|-------------------------------------------------------------------------------------------------|--------------------------------------------------------------------------------------|----------------------------------------------------|
| <p><b>hexT-Ac</b></p> <p><b>AcNH-(CH<sub>2</sub>)<sub>6</sub>-</b><br/><b>5'-TTT TTT-3'</b></p> | 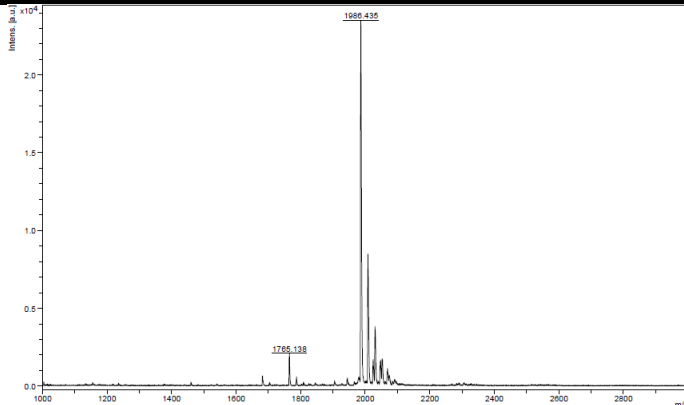   | <p>mass calc. = 1985.4<br/>mass found = 1986.4</p> |
| <p><b>10mer TC</b></p> <p><b>5'-TTC CTC TCC T-3'</b></p>                                        |   | <p>mass calc. = 2904.9<br/>mass found = 2906.2</p> |
| <p><b>10mer ATC</b></p> <p><b>5'-TTA CTA CCT A-3'</b></p>                                       |  | <p>mass calc. = 2962.0<br/>mass found = 2962.3</p> |
| <p><b>10mer ATGC</b></p> <p><b>5'-GTC ATG ATC T-3'</b></p>                                      |  | <p>mass calc. = 3019.0<br/>mass found = 3018.0</p> |

## CPG-oligonucleotide + Quinine C

According to the representative procedure (RP-04) solid support coupled oligonucleotide (20 nmol) was treated with Quinine **C** (200 equiv., 4  $\mu$ mol) in dry MeOH.

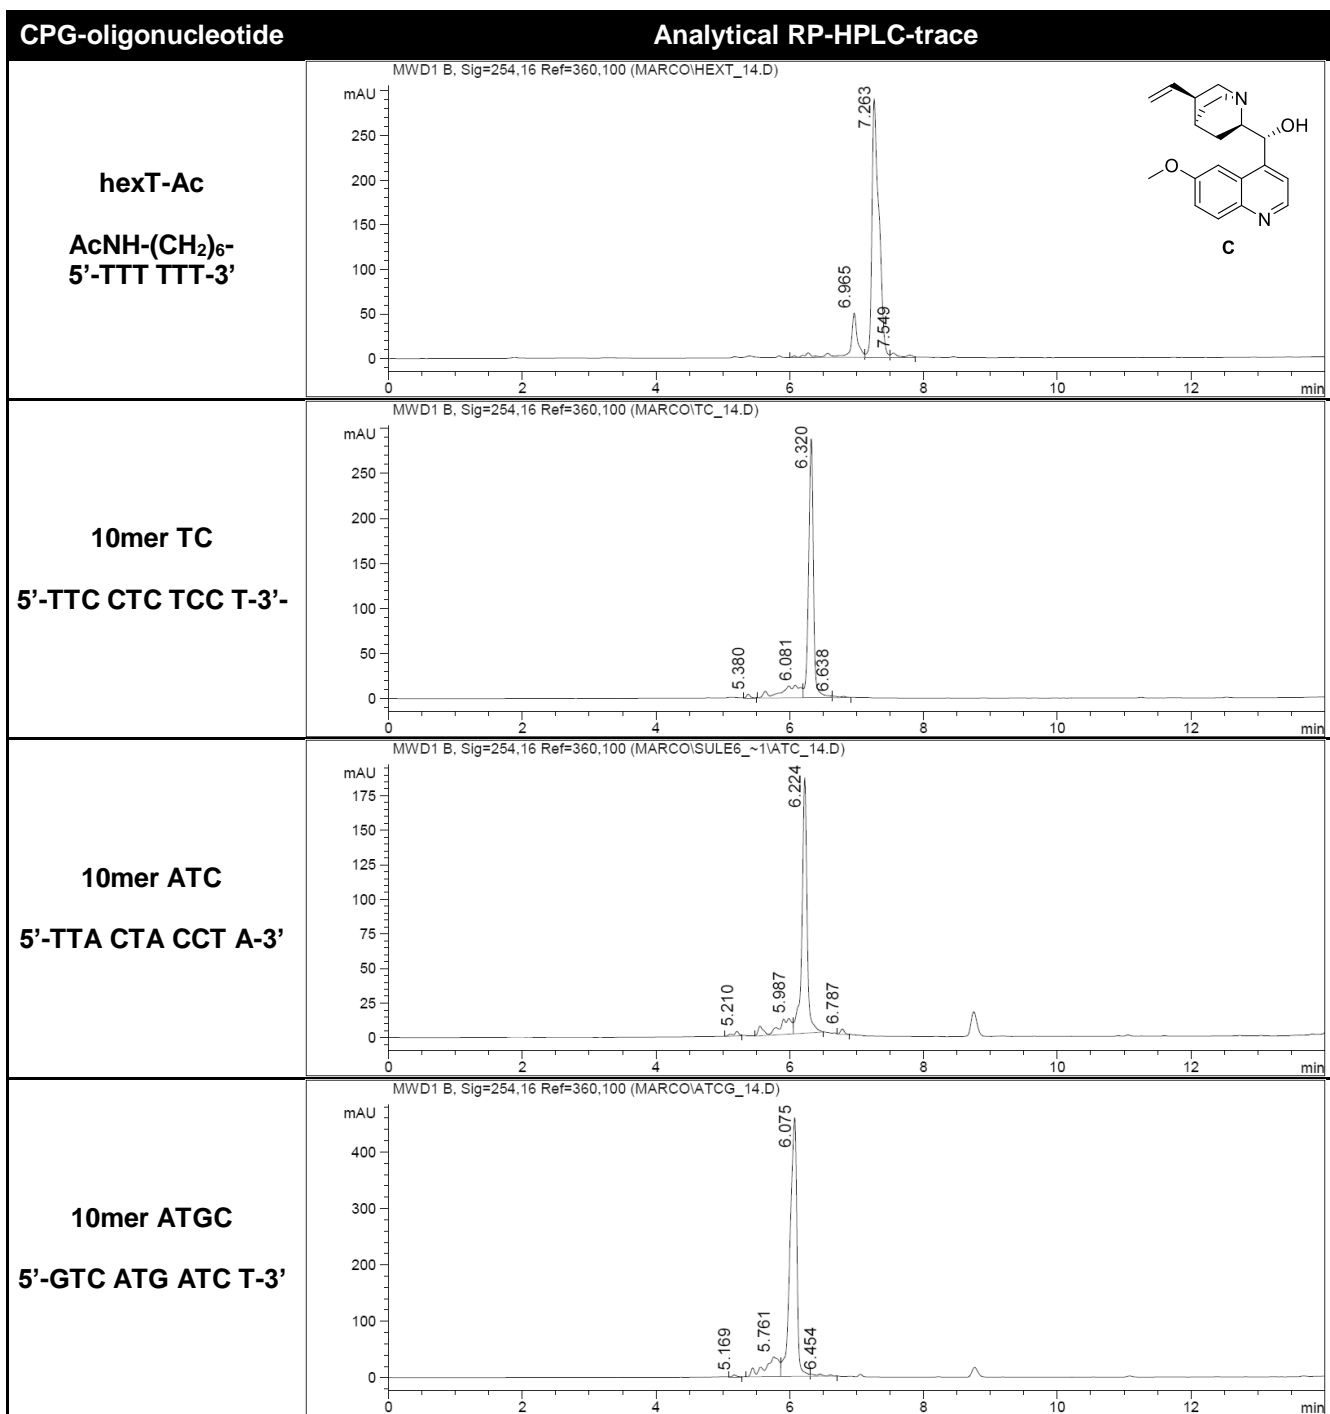

| CPG-oligonucleotide                                                                             | MALDI-MS spectra                                                                                                                       |                                                    |
|-------------------------------------------------------------------------------------------------|----------------------------------------------------------------------------------------------------------------------------------------|----------------------------------------------------|
| <p><b>hexT-Ac</b></p> <p><b>AcNH-(CH<sub>2</sub>)<sub>6</sub>-</b><br/><b>5'-TTT TTT-3'</b></p> | 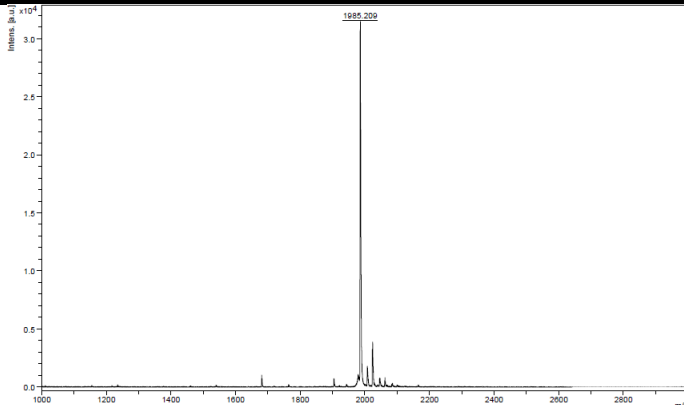 <p>Intensity [a.u.] × 10<sup>4</sup></p> <p>m/z</p> | <p>mass calc. = 1985.4<br/>mass found = 1985.2</p> |
| <p><b>10mer TC</b></p> <p><b>5'-TTC CTC TCC T-3'</b></p>                                        |  <p>Intensity [a.u.]</p> <p>m/z</p>                 | <p>mass calc. = 2904.9<br/>mass found = 2903.7</p> |
| <p><b>10mer ATC</b></p> <p><b>5'-TTA CTA CCT A-3'</b></p>                                       |  <p>Intensity [a.u.]</p> <p>m/z</p>                | <p>mass calc. = 2962.0<br/>mass found = 2960.3</p> |
| <p><b>10mer ATGC</b></p> <p><b>5'-GTC ATG ATC T-3'</b></p>                                      |  <p>Intensity [a.u.]</p> <p>m/z</p>                | <p>mass calc. = 3019.0<br/>mass found = 3017.8</p> |

## CPG-oligonucleotide + Cinchonidine L

According to the representative procedure (RP-04) solid support coupled oligonucleotide (20 nmol) was treated with Cinchonidine **L** (200 equiv., 4  $\mu$ mol) in dry MeOH.

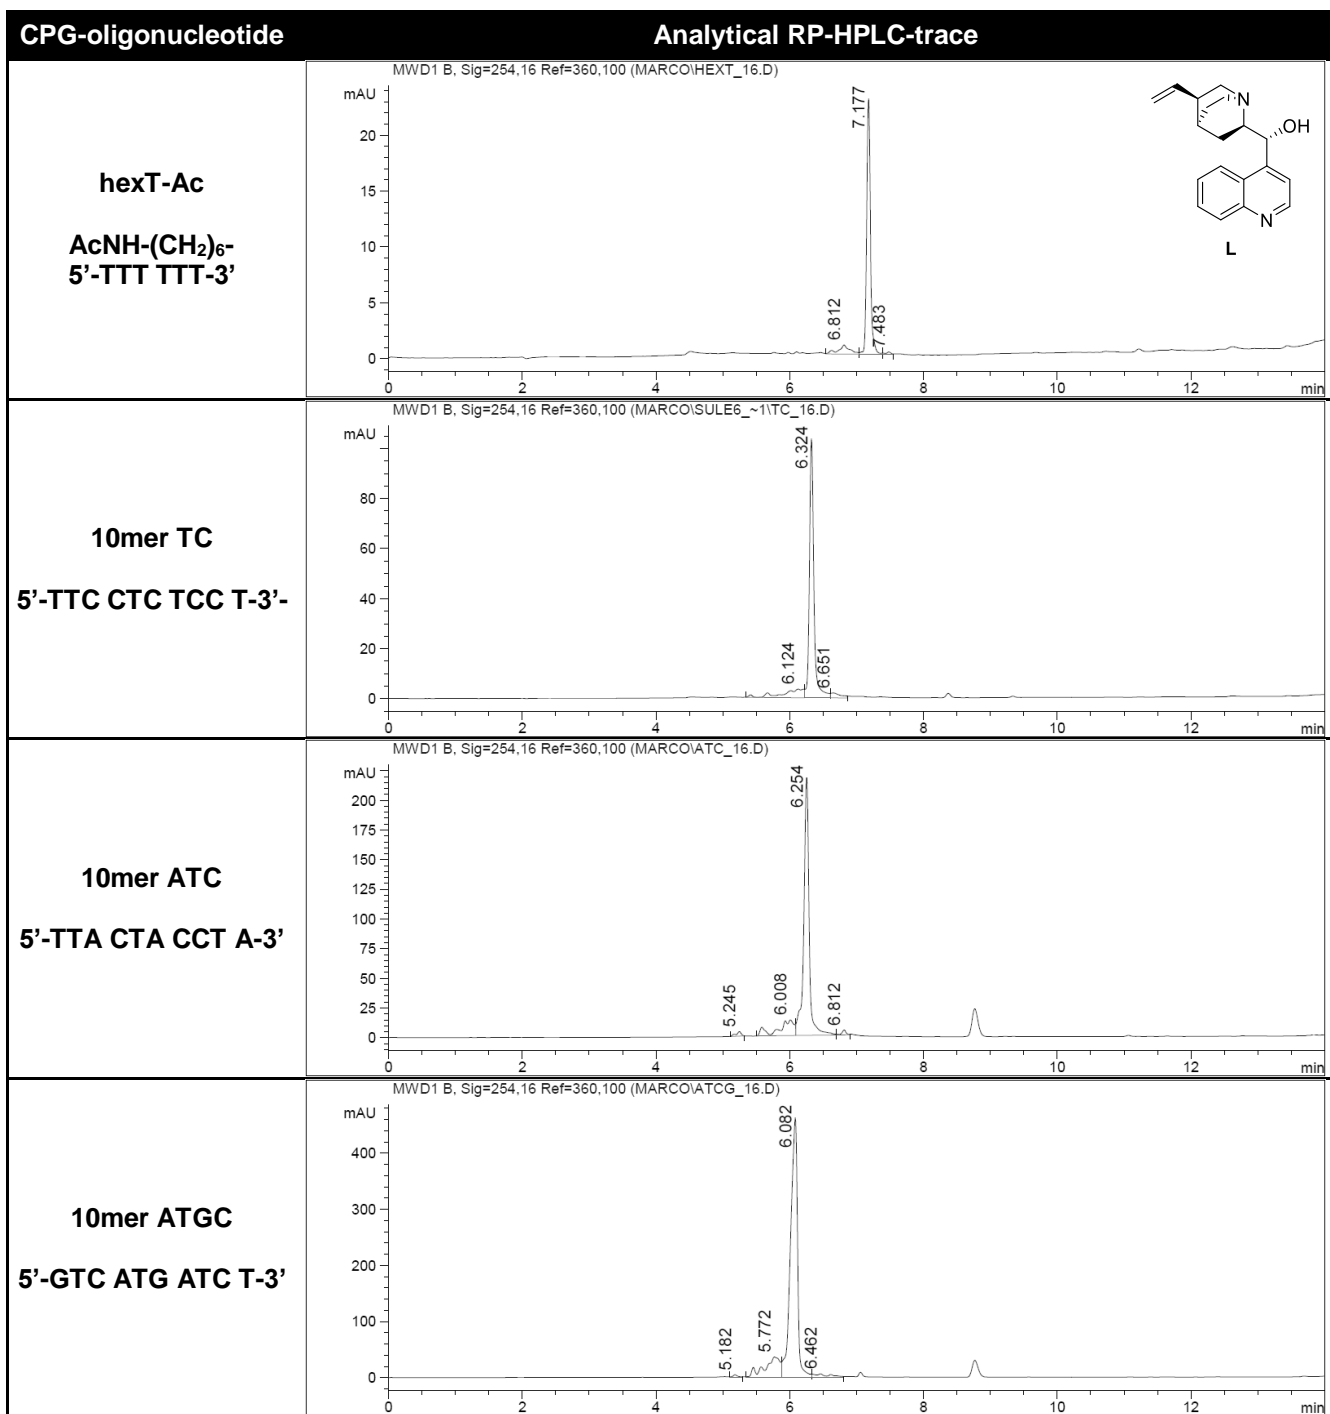

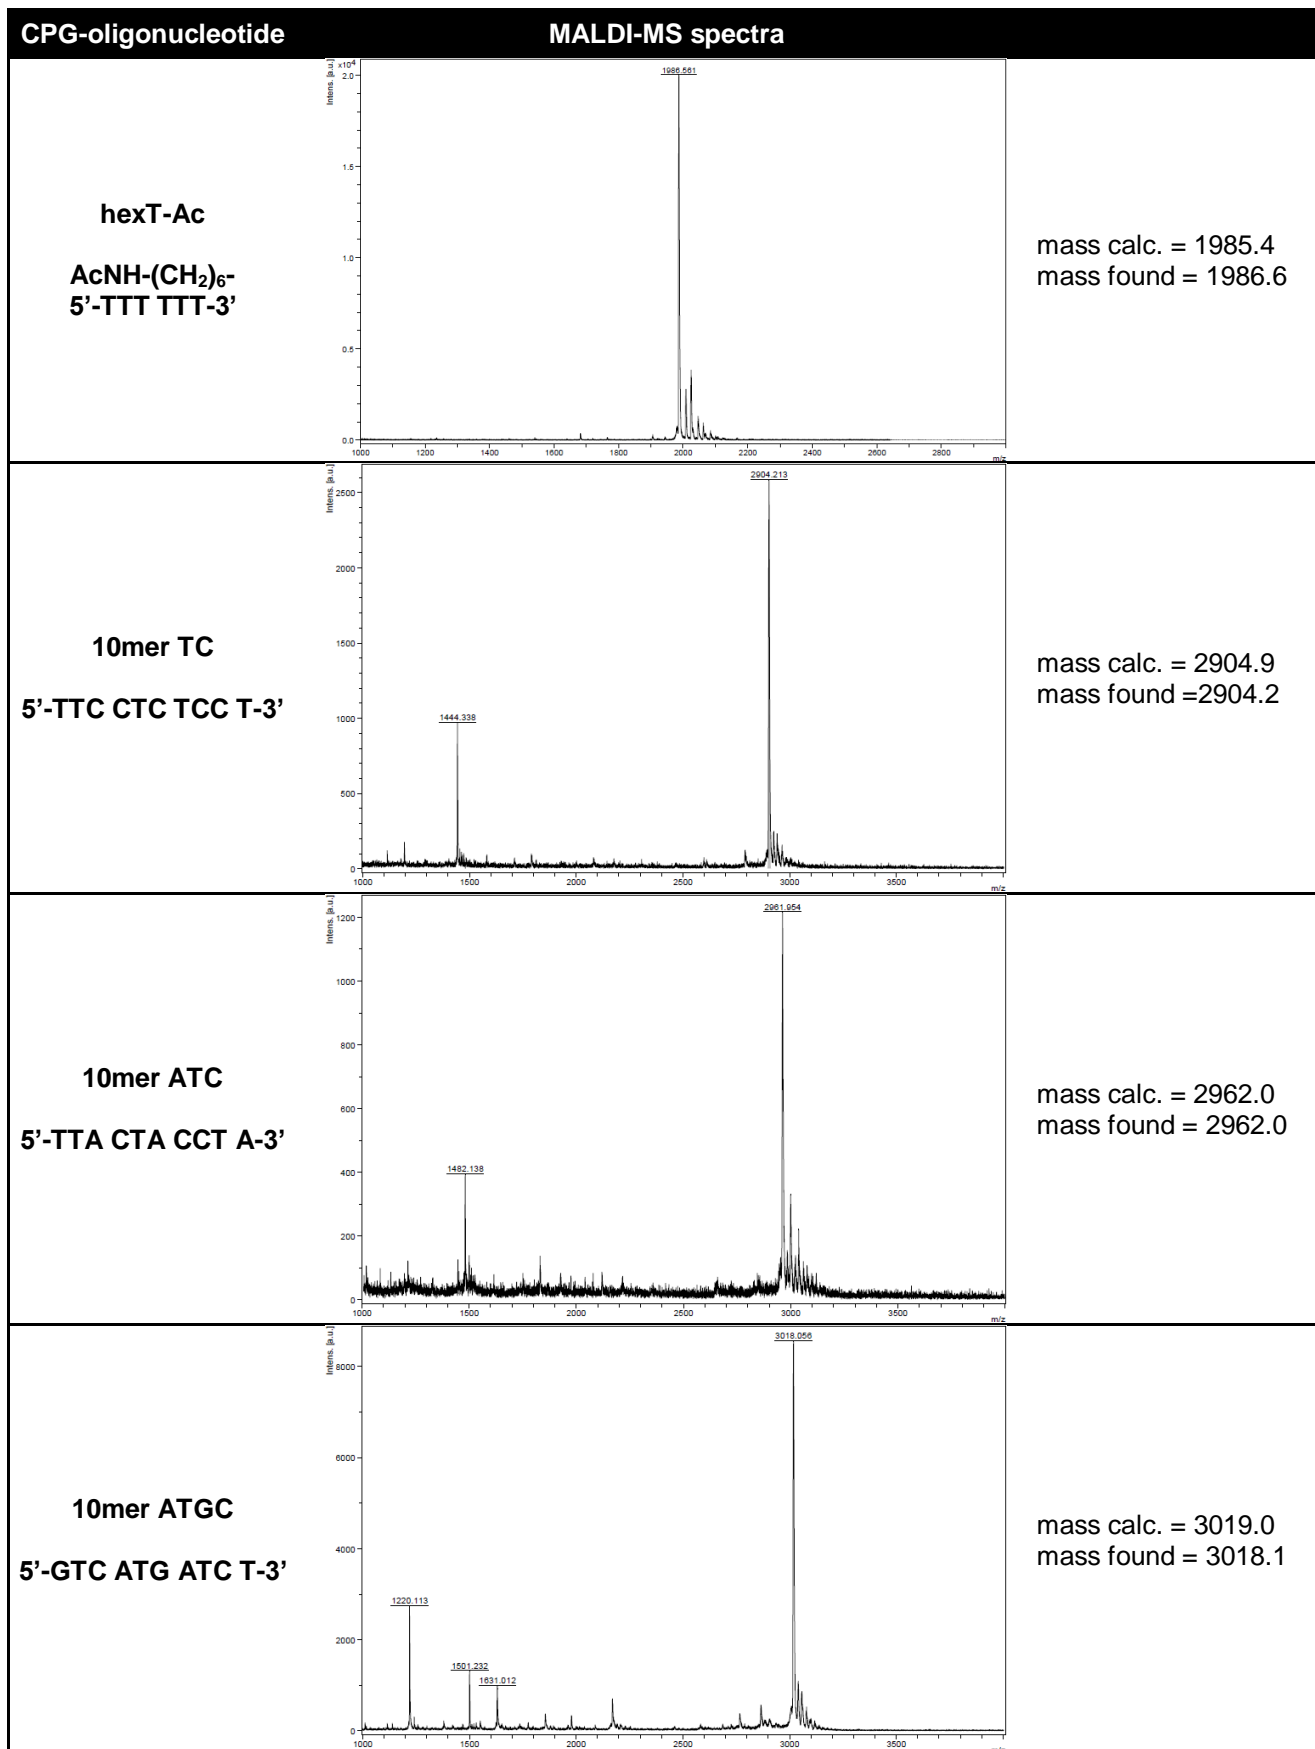

## CPG-oligonucleotide + (DHQD)<sub>2</sub>PHAL **M**

According to the representative procedure (RP-04) solid support coupled oligonucleotide (20 nmol) was treated with (DHQD)<sub>2</sub>PHAL **M** (200 equiv., 4  $\mu$ mol) in dry MeOH.

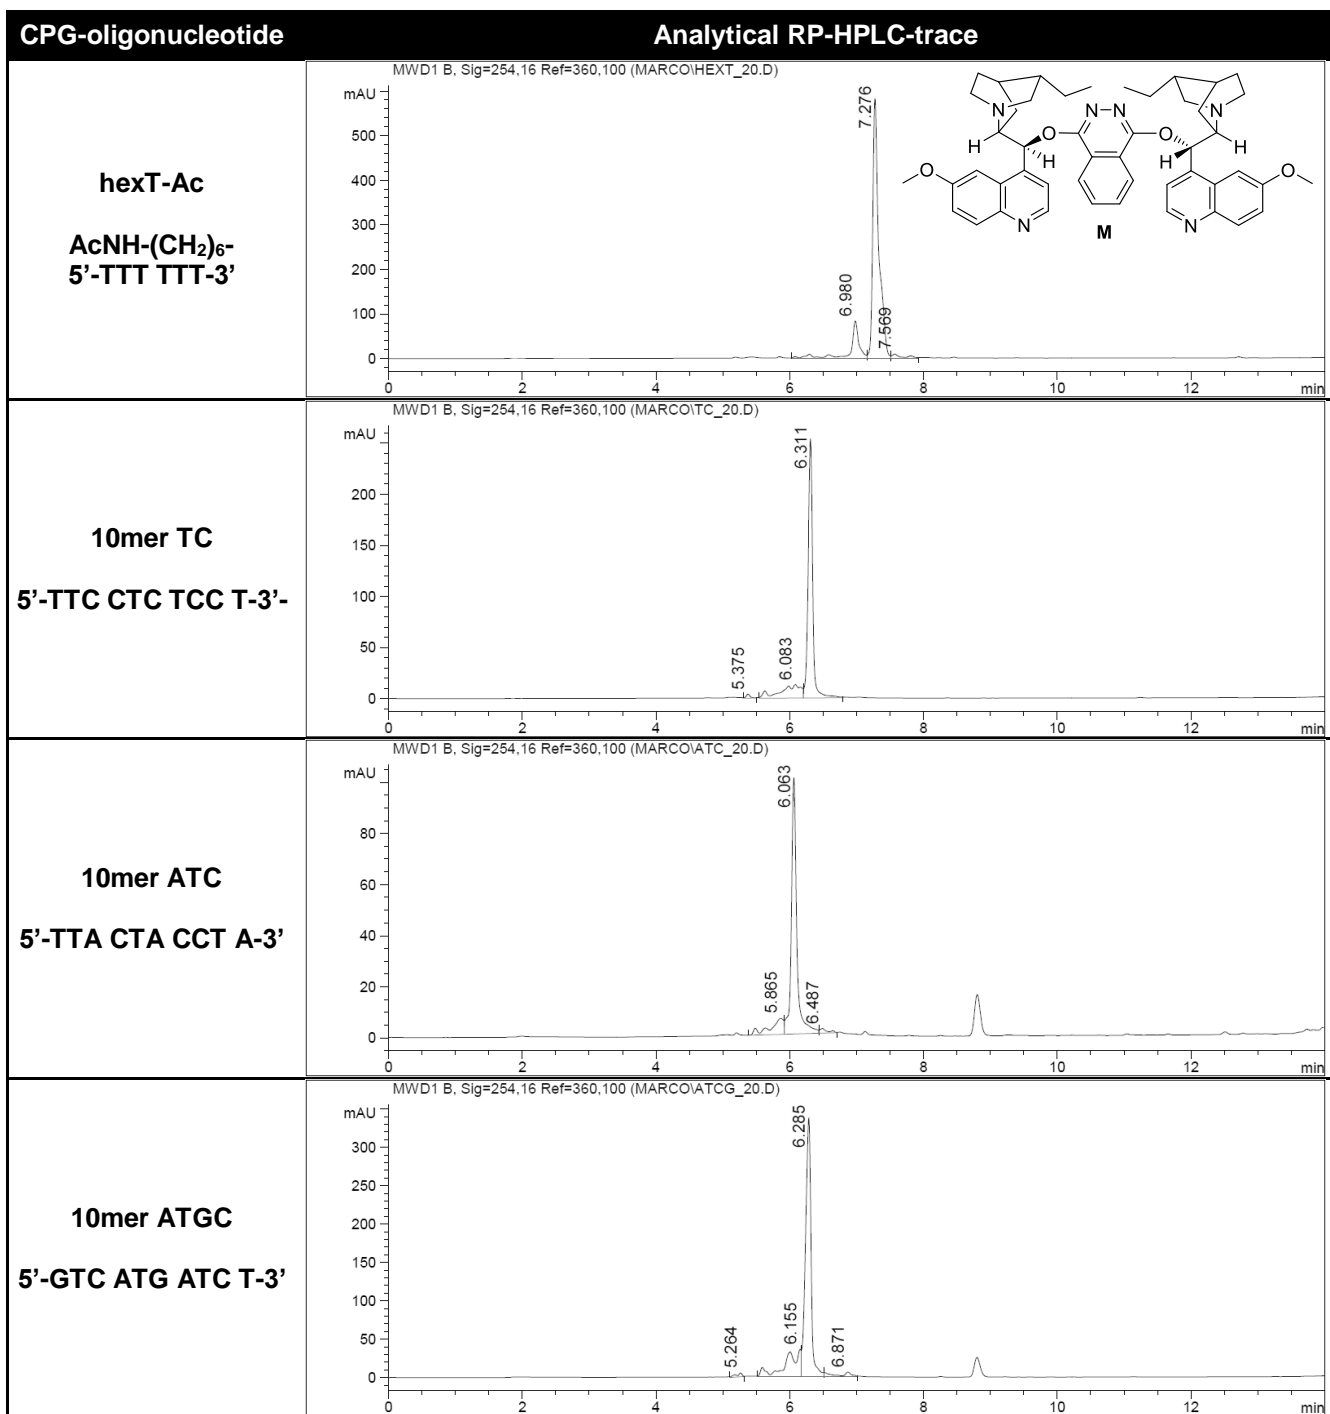



| CPG-oligonucleotide                                                                             | MALDI-MS spectra                                                                                                                                                      |                                                    |
|-------------------------------------------------------------------------------------------------|-----------------------------------------------------------------------------------------------------------------------------------------------------------------------|----------------------------------------------------|
| <p><b>hexT-Ac</b></p> <p><b>AcNH-(CH<sub>2</sub>)<sub>6</sub>-</b><br/><b>5'-TTT TTT-3'</b></p> | 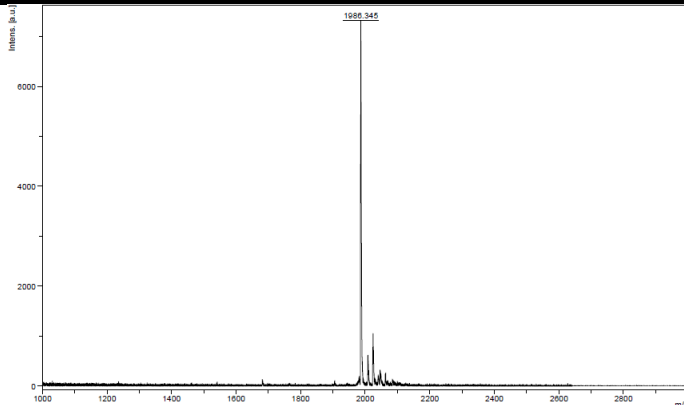 <p>Intensity (a.u.) vs m/z. Major peak at 1986.345.</p>                            | <p>mass calc. = 1985.4<br/>mass found = 1986.4</p> |
| <p><b>10mer TC</b></p> <p><b>5'-TTC CTC TCC T-3'</b></p>                                        |  <p>Intensity (a.u.) vs m/z. Major peaks at 1445.187 and 2906.151.</p>             | <p>mass calc. = 2904.9<br/>mass found = 2906.2</p> |
| <p><b>10mer ATC</b></p> <p><b>5'-TTA CTA CCT A-3'</b></p>                                       |  <p>Intensity (a.u.) vs m/z. Major peaks at 1472.852, 1824.489, and 2960.868.</p> | <p>mass calc. = 2962.0<br/>mass found = 2960.9</p> |
| <p><b>10mer ATGC</b></p> <p><b>5'-GTC ATG ATC T-3'</b></p>                                      |  <p>Intensity (a.u.) vs m/z. Major peaks at 1321.915, 1502.834, and 3021.302.</p> | <p>mass calc. = 3019.0<br/>mass found = 3021.3</p> |

## CPG-oligonucleotide + L-Prolin D

According to the representative procedure (RP-04) solid support coupled oligonucleotide (20 nmol) was treated with L-Prolin D (200 equiv., 4  $\mu$ mol) in dry ACN.

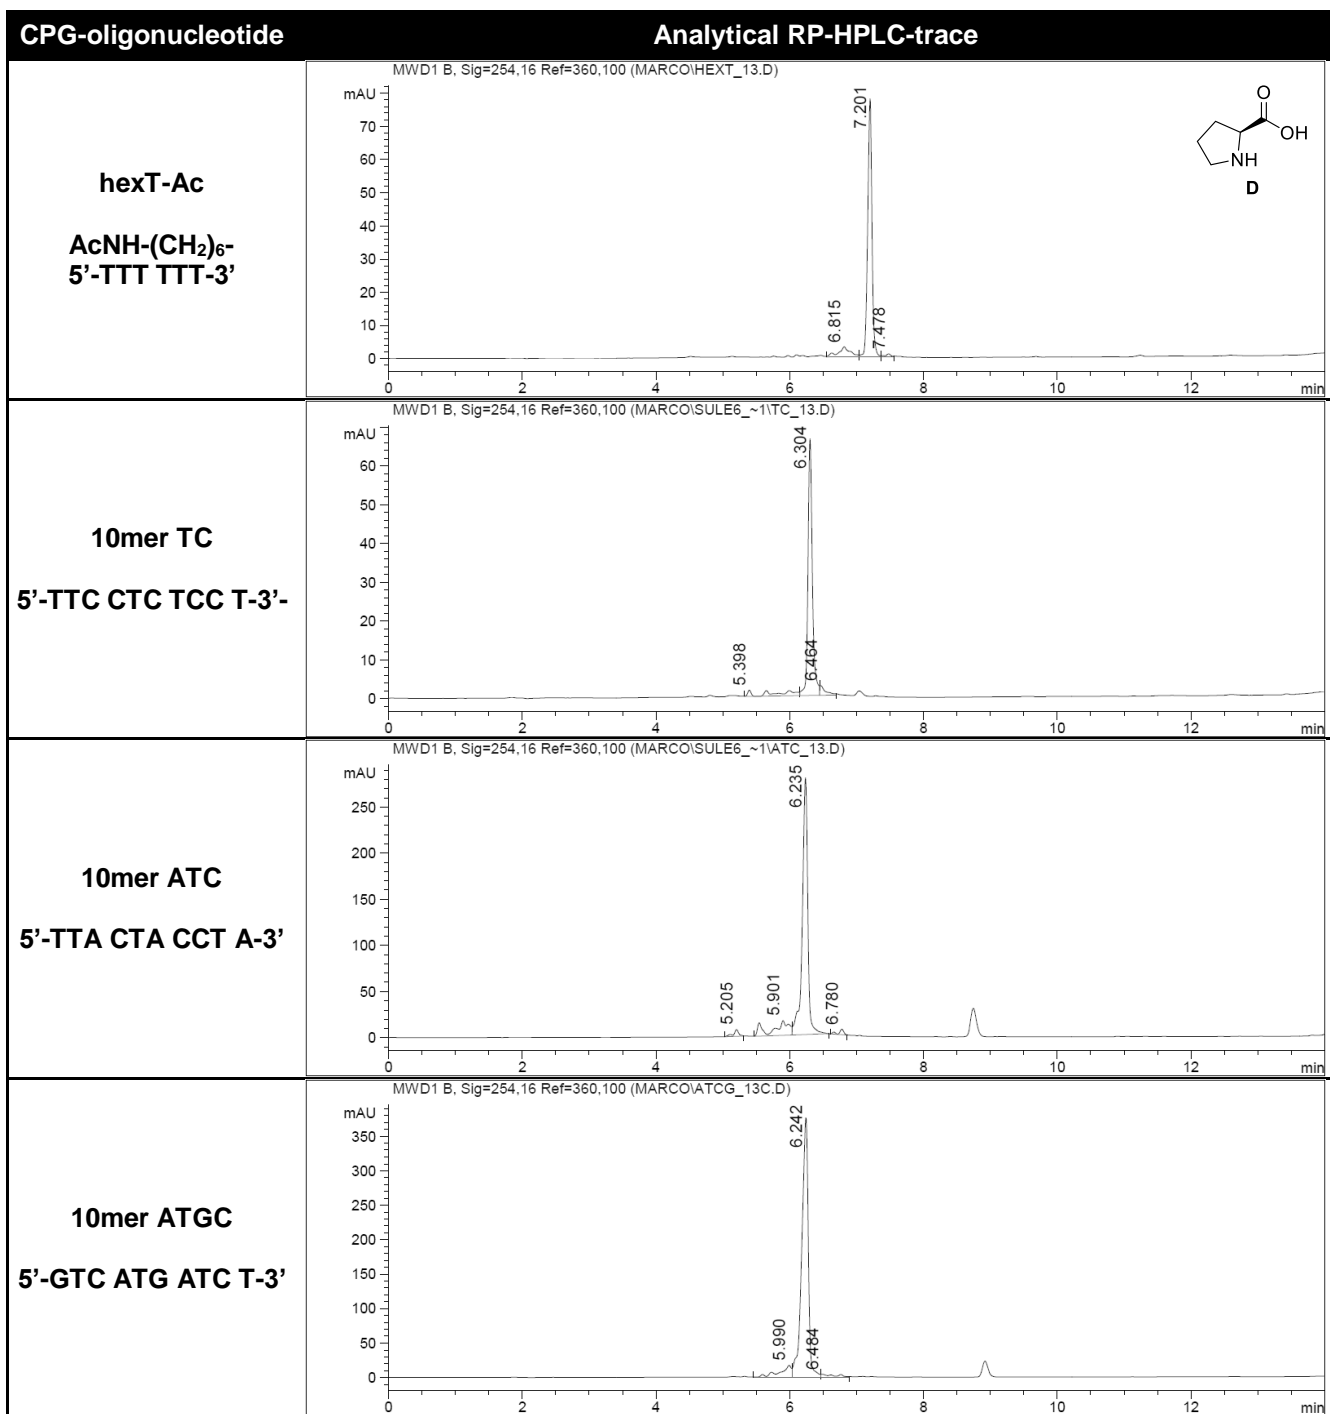

| CPG-oligonucleotide                                                                             | MALDI-MS spectra                                                                                                                                                                 |                                                    |
|-------------------------------------------------------------------------------------------------|----------------------------------------------------------------------------------------------------------------------------------------------------------------------------------|----------------------------------------------------|
| <p><b>hexT-Ac</b></p> <p><b>AcNH-(CH<sub>2</sub>)<sub>6</sub>-</b><br/><b>5'-TTT TTT-3'</b></p> | 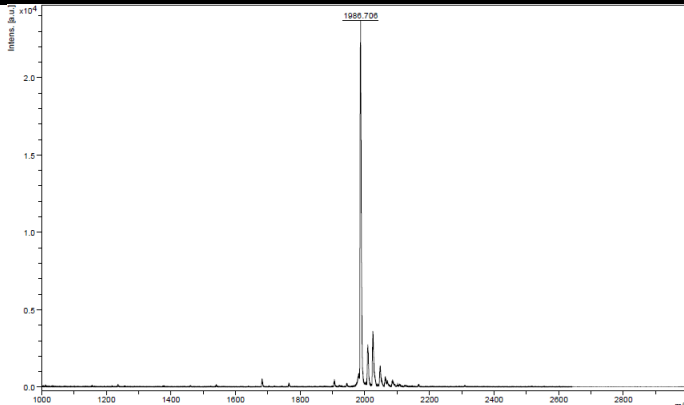 <p>Mass spectrum showing a major peak at m/z 1986.706.</p>                                    | <p>mass calc. = 1985.4<br/>mass found = 1986.7</p> |
| <p><b>10mer TC</b></p> <p><b>5'-TTC CTC TCC T-3'</b></p>                                        |  <p>Mass spectrum showing major peaks at m/z 1444.874 and 2905.392.</p>                       | <p>mass calc. = 2904.9<br/>mass found = 2905.4</p> |
| <p><b>10mer ATC</b></p> <p><b>5'-TTA CTA CCT A-3'</b></p>                                       |  <p>Mass spectrum showing major peaks at m/z 1472.556 and 2961.082.</p>                      | <p>mass calc. = 2962.0<br/>mass found = 2961.0</p> |
| <p><b>10mer ATGC</b></p> <p><b>5'-GTC ATG ATC T-3'</b></p>                                      |  <p>Mass spectrum showing major peaks at m/z 1220.031, 1500.986, 1830.790, and 3018.377.</p> | <p>mass calc. = 3019.0<br/>mass found = 3018.4</p> |

## CPG-oligonucleotide + (*R*)- $\alpha,\alpha$ -Diphenylprolinol **N**

According to the representative procedure (RP-04) solid support coupled oligonucleotide (20 nmol) was treated with (*R*)- $\alpha,\alpha$ -Diphenylprolinol **N** (200 equiv., 4  $\mu$ mol) in dry ACN.

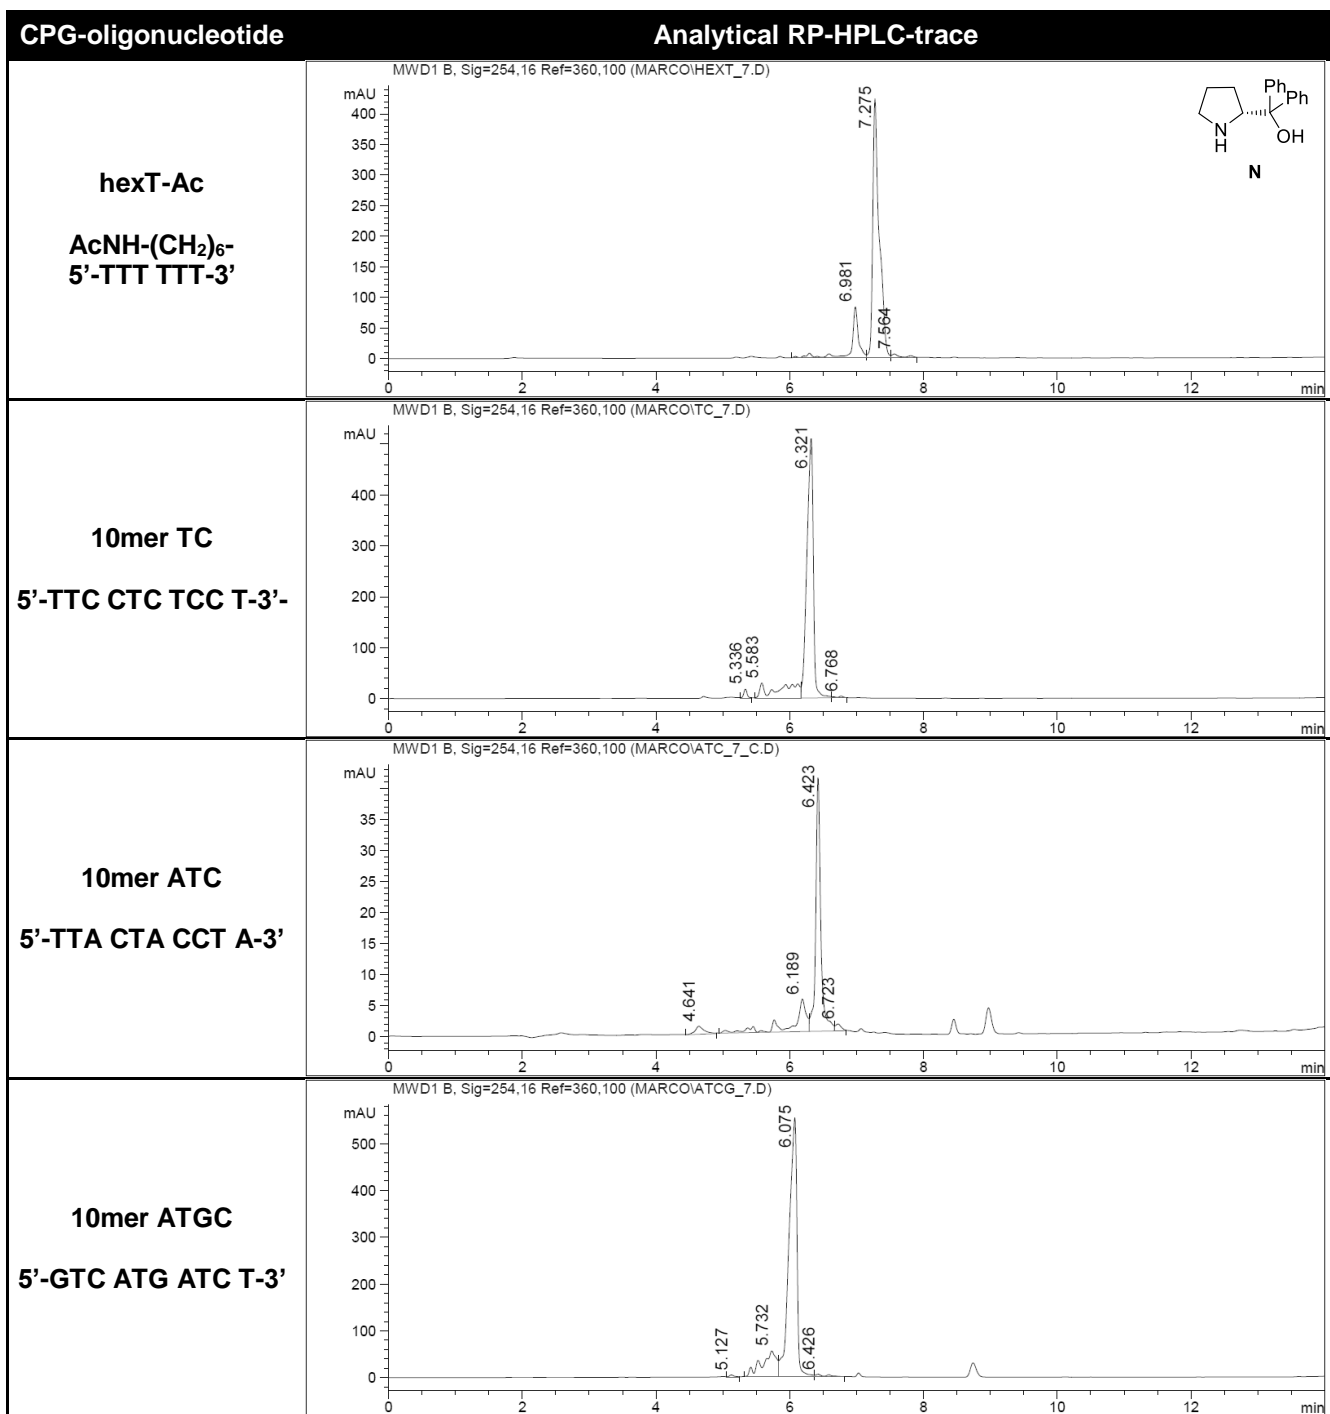

| CPG-oligonucleotide                                                                             | MALDI-MS spectra                                                                                                                                                                                                                                                                                                                                                                                                          |                                                    |
|-------------------------------------------------------------------------------------------------|---------------------------------------------------------------------------------------------------------------------------------------------------------------------------------------------------------------------------------------------------------------------------------------------------------------------------------------------------------------------------------------------------------------------------|----------------------------------------------------|
| <p><b>hexT-Ac</b></p> <p><b>AcNH-(CH<sub>2</sub>)<sub>6</sub>-</b><br/><b>5'-TTT TTT-3'</b></p> | 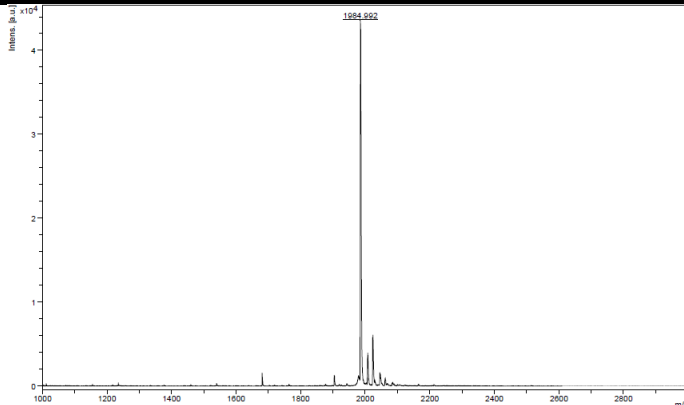 <p>The spectrum shows a single prominent peak at m/z 1984.952. The y-axis is labeled 'Intensity [a.u.]' and ranges from 0 to 4. The x-axis is labeled 'm/z' and ranges from 1000 to 2800.</p>                                                                                                                                          | <p>mass calc. = 1985.4<br/>mass found = 1985.0</p> |
| <p><b>10mer TC</b></p> <p><b>5'-TTC CTC TCC T-3'</b></p>                                        |  <p>The spectrum shows two major peaks. The first peak is at m/z 1444.124 with an intensity of approximately 600. The second, larger peak is at m/z 2904.224 with an intensity of approximately 600. The y-axis is labeled 'Intensity [a.u.]' and ranges from 0 to 600. The x-axis is labeled 'm/z' and ranges from 1000 to 3500.</p>  | <p>mass calc. = 2904.9<br/>mass found = 2904.2</p> |
| <p><b>10mer ATC</b></p> <p><b>5'-TTA CTA CCT A-3'</b></p>                                       |  <p>The spectrum shows two major peaks. The first peak is at m/z 1473.306 with an intensity of approximately 400. The second, larger peak is at m/z 2962.362 with an intensity of approximately 600. The y-axis is labeled 'Intensity [a.u.]' and ranges from 0 to 600. The x-axis is labeled 'm/z' and ranges from 1000 to 3500.</p> | <p>mass calc. = 2962.0<br/>mass found = 2962.4</p> |
| <p><b>10mer ATGC</b></p> <p><b>5'-GTC ATG ATC T-3'</b></p>                                      |  <p>The spectrum shows several peaks. The most prominent peak is at m/z 3019.955 with an intensity of approximately 1200. Other labeled peaks include m/z 1219.849, 1501.395, and 1630.918. The y-axis is labeled 'Intensity [a.u.]' and ranges from 0 to 1200. The x-axis is labeled 'm/z' and ranges from 1000 to 3500.</p>         | <p>mass calc. = 3019.0<br/>mass found = 3019.0</p> |

## CPG-oligonucleotide + (*R*)- $\alpha,\alpha$ -Diphenylprolinol TMS ether **E**

According to the representative procedure (RP-04) solid support coupled oligonucleotide (20 nmol) was treated with (*R*)- $\alpha,\alpha$ -Diphenylprolinol TMS ether **E** (200 equiv., 4  $\mu$ mol) in dry ACN.

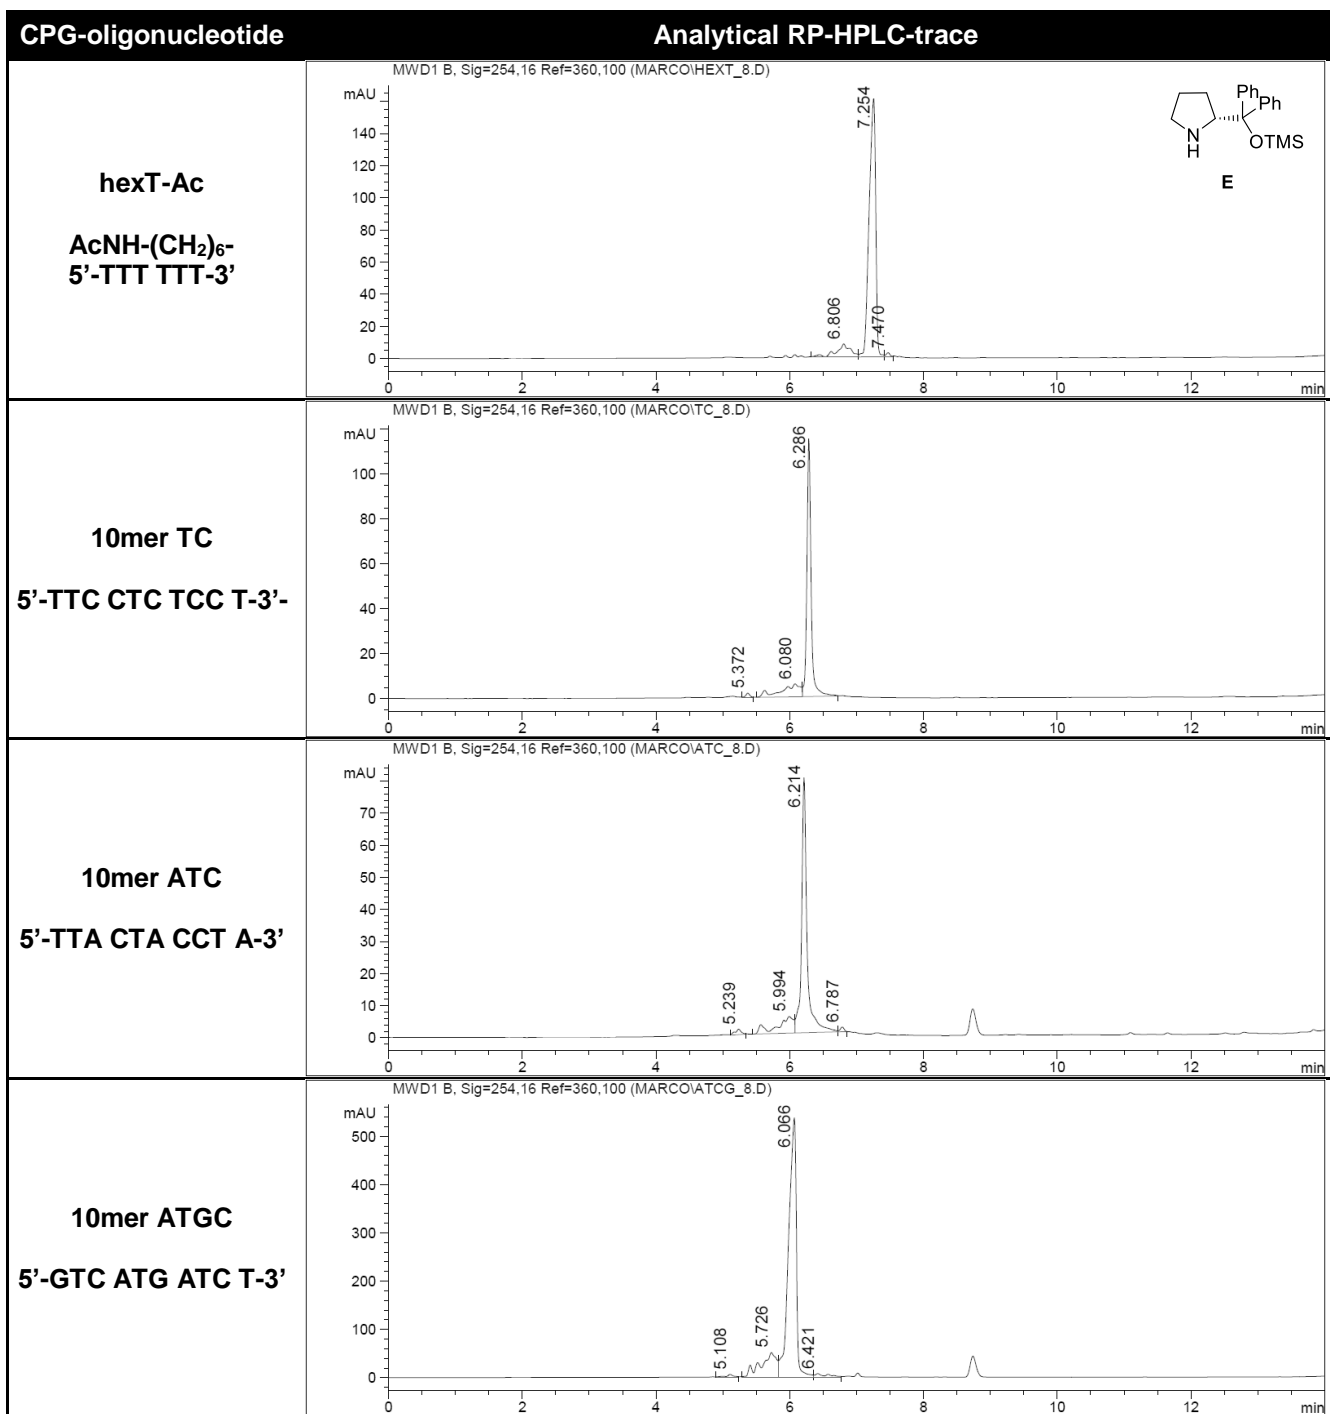

## CPG-oligonucleotide

## MALDI-MS spectra

**hexT-Ac****AcNH-(CH<sub>2</sub>)<sub>6</sub>-  
5'-TTT TTT-3'**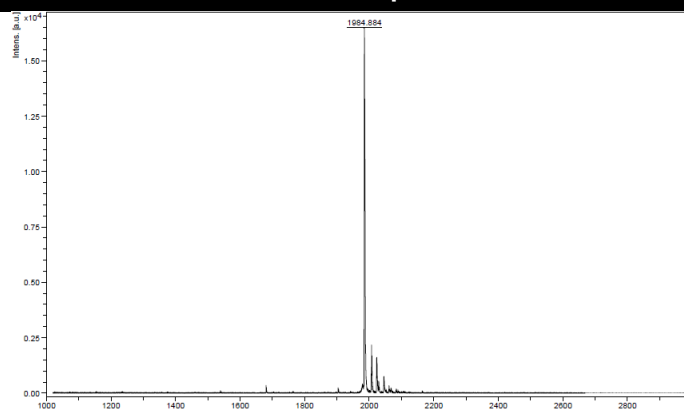mass calc. = 1985.4  
mass found = 1984.9**10mer TC****5'-TTC CTC TCC T-3'**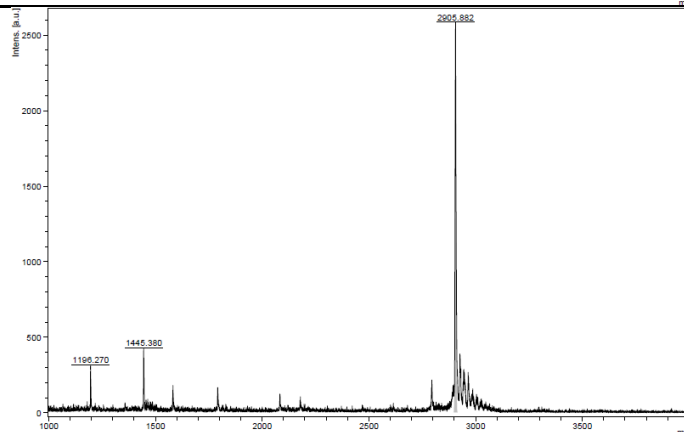mass calc. = 2904.9  
mass found = 2905.9**10mer ATC****5'-TTA CTA CCT A-3'**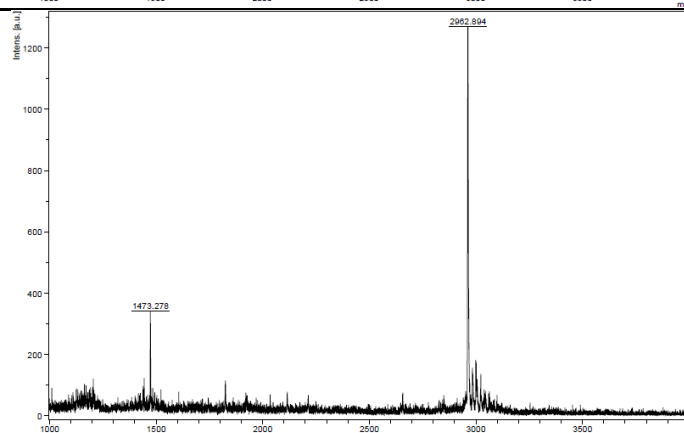mass calc. = 2962.0  
mass found = 2962.9**10mer ATGC****5'-GTC ATG ATC T-3'**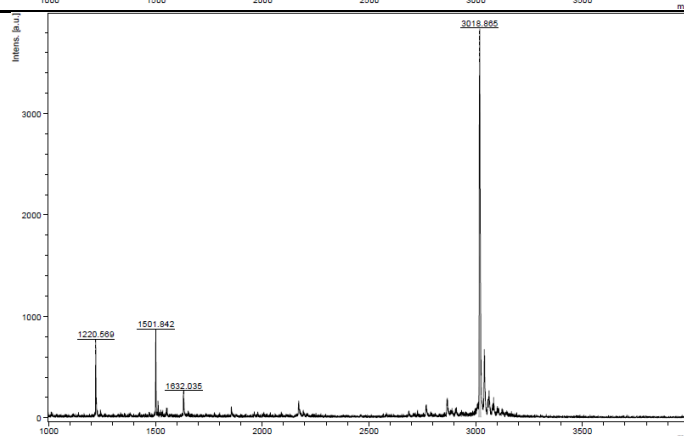mass calc. = 3019.0  
mass found = 3018.9

## CPG-oligonucleotide + (S)-(-)-2-Tetrazol-5-ylpyrrolidine **O**

According to the representative procedure (RP-04) solid support coupled oligonucleotide (20 nmol) was treated with (S)-(-)-2-Tetrazol-5-ylpyrrolidine **O** (200 equiv., 4  $\mu$ mol) in dry MeOH.

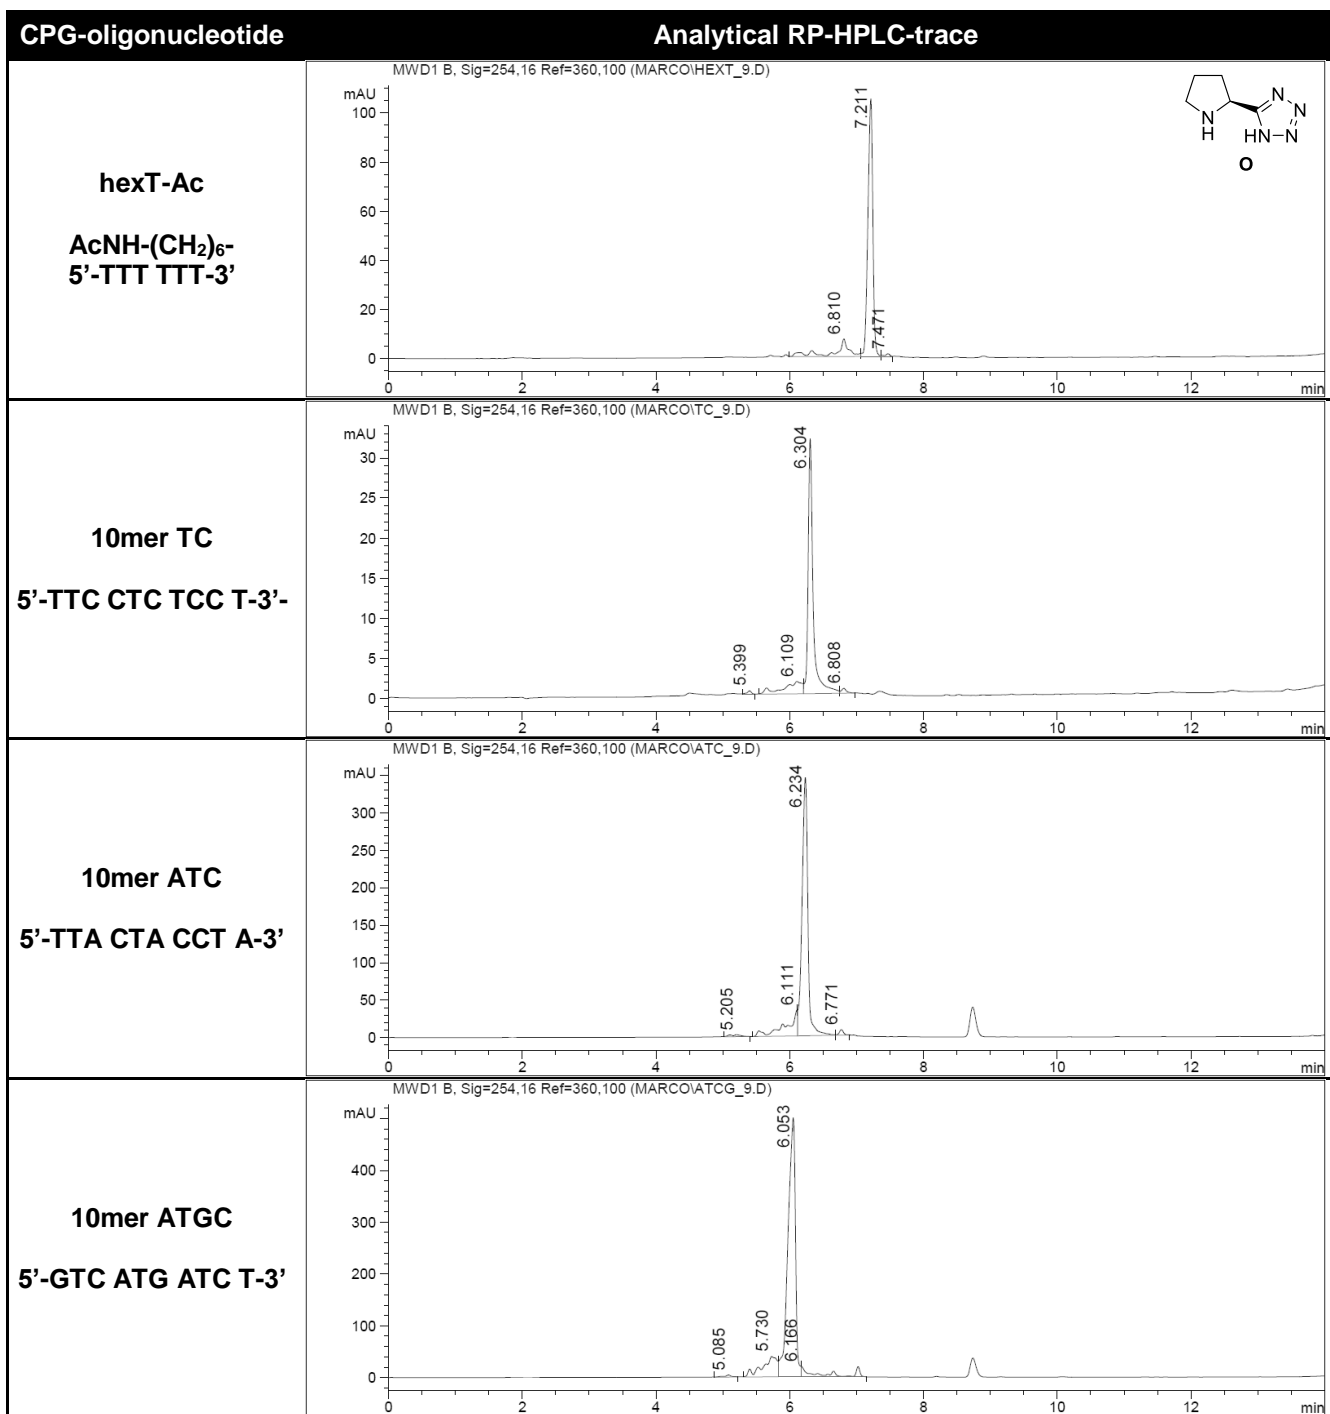



## CPG-oligonucleotide

## MALDI-MS spectra

hexT-Ac

 $\text{AcNH}-(\text{CH}_2)_6-$   
5'-TTT TTT-3'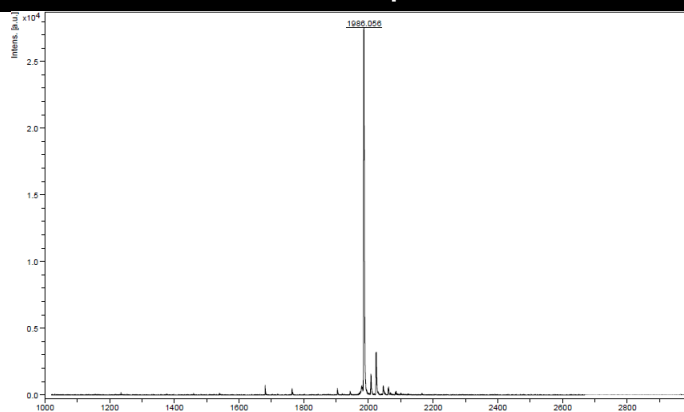mass calc. = 1985.4  
mass found = 1986.1

10mer TC

5'-TTC CTC TCC T-3'

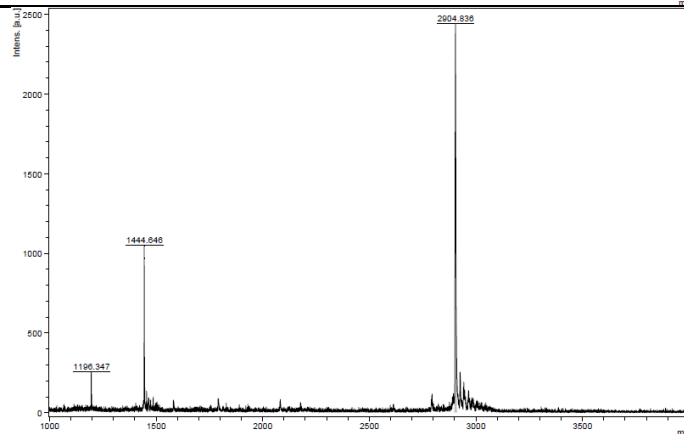mass calc. = 2904.9  
mass found = 2904.8

10mer ATC

5'-TTA CTA CCT A-3'

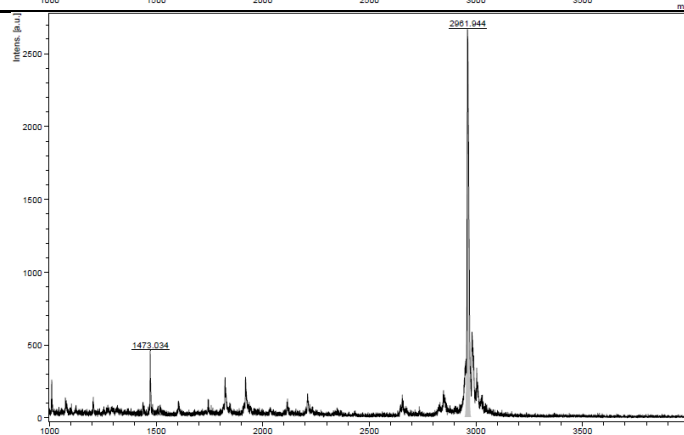mass calc. = 2962.0  
mass found = 2961.9

10mer ATGC

5'-GTC ATG ATC T-3'

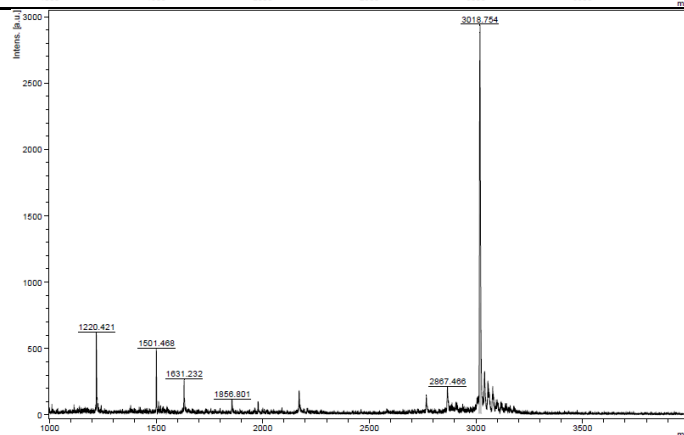mass calc. = 3019.0  
mass found = 3018.8

**CPG-oligonucleotide + (5S)-(-)-2,2,3-Trimethyl-5-benzyl-4-imidazolidinone monohydrochloride P**

According to the representative procedure (RP-04) solid support coupled oligonucleotide (20 nmol) was treated with (5S)-(-)-2,2,3-Trimethyl-5-benzyl-4-imidazolidinone monohydrochloride **P** (200 equiv., 4  $\mu$ mol) in dry MeOH.

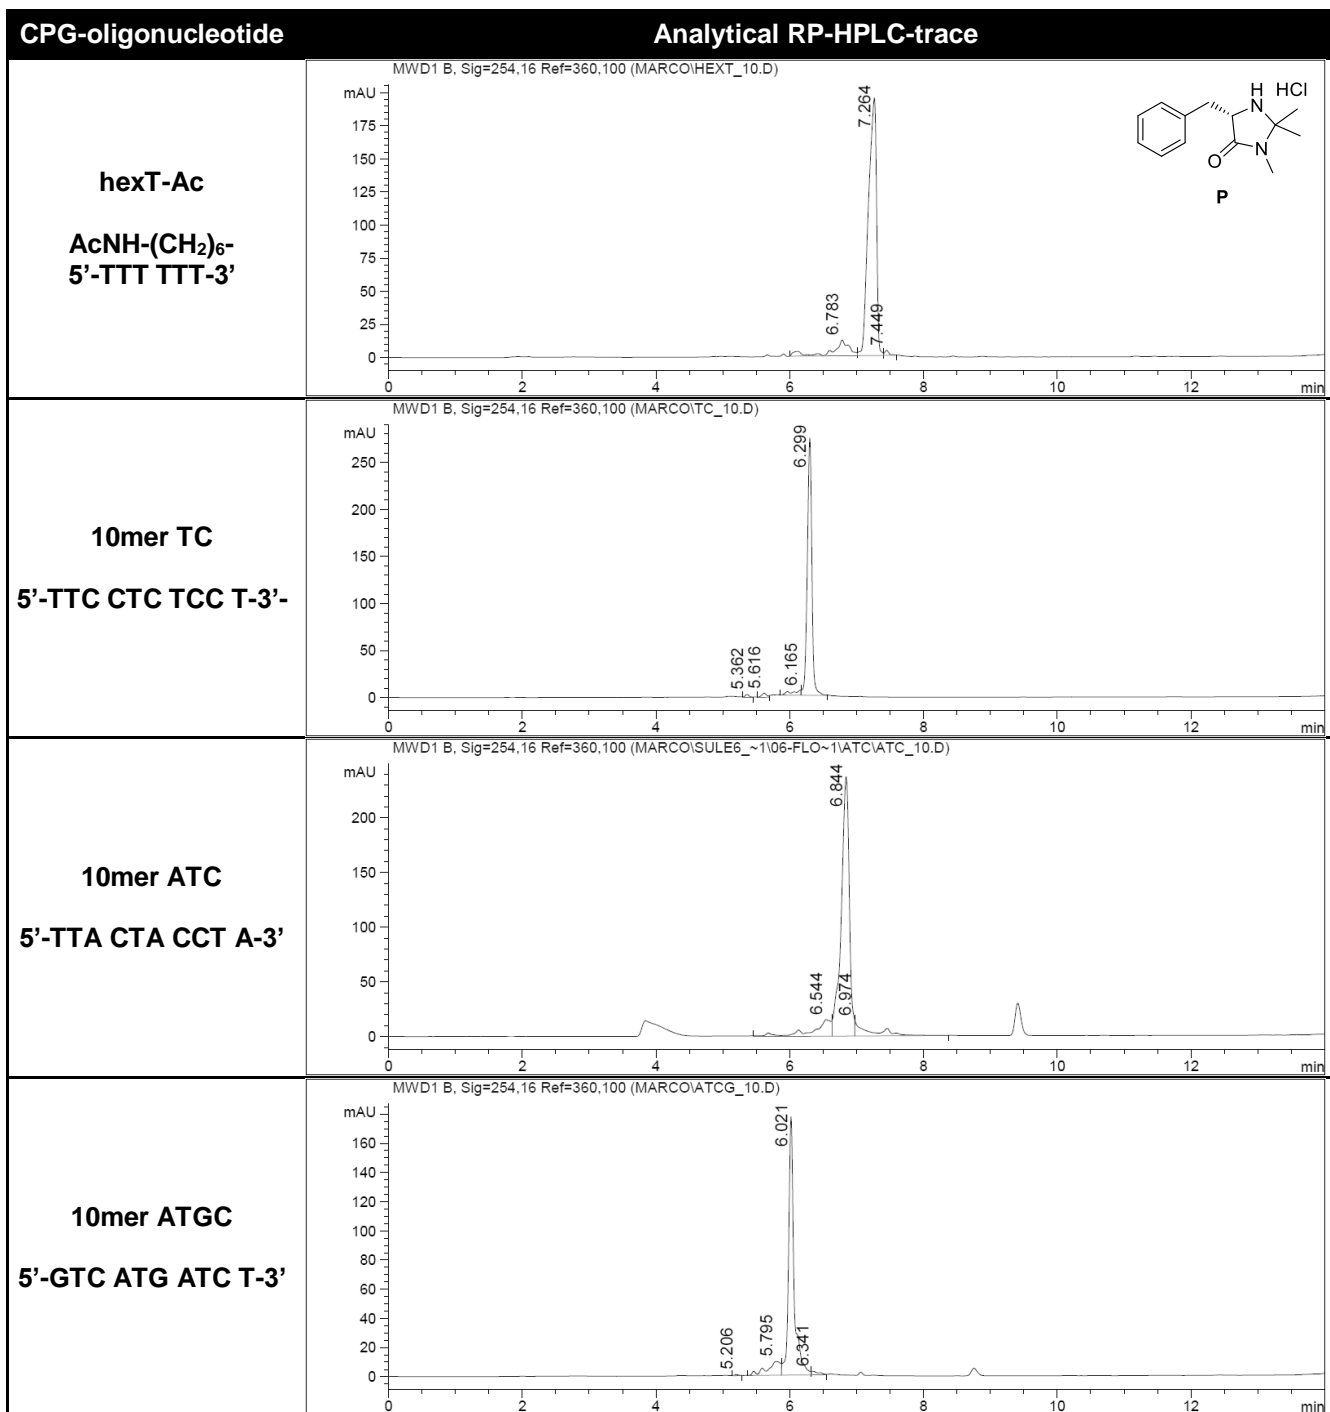

| CPG-oligonucleotide                                                                             | MALDI-MS spectra                                                                     |                                                    |
|-------------------------------------------------------------------------------------------------|--------------------------------------------------------------------------------------|----------------------------------------------------|
| <p><b>hexT-Ac</b></p> <p><b>AcNH-(CH<sub>2</sub>)<sub>6</sub>-</b><br/><b>5'-TTT TTT-3'</b></p> | 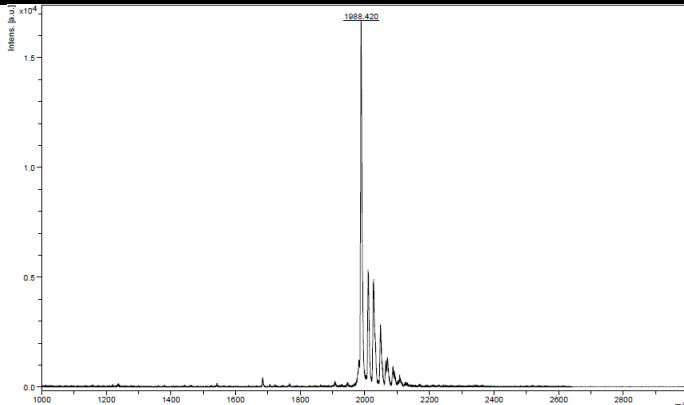   | <p>mass calc. = 1985.4<br/>mass found = 1988.4</p> |
| <p><b>10mer TC</b></p> <p><b>5'-TTC CTC TCC T-3'</b></p>                                        |   | <p>mass calc. = 2904.9<br/>mass found = 2904.4</p> |
| <p><b>10mer ATC</b></p> <p><b>5'-TTA CTA CCT A-3'</b></p>                                       |  | <p>mass calc. = 2962.0<br/>mass found = 2962.6</p> |
| <p><b>10mer ATGC</b></p> <p><b>5'-GTC ATG ATC T-3'</b></p>                                      |  | <p>mass calc. = 3019.0<br/>mass found = 3019.1</p> |

**CPG-oligonucleotide + (2*R*,5*R*)-(+)-2-*tert*-Butyl-3-methyl-5-benzyl-4-imidazolidinone **Q****

According to the representative procedure (RP-04) solid support coupled oligonucleotide (20 nmol) was treated with (2*R*,5*R*)-(+)-2-*tert*-Butyl-3-methyl-5-benzyl-4-imidazolidinone **Q** (200 equiv., 4  $\mu$ mol) in dry ACN.

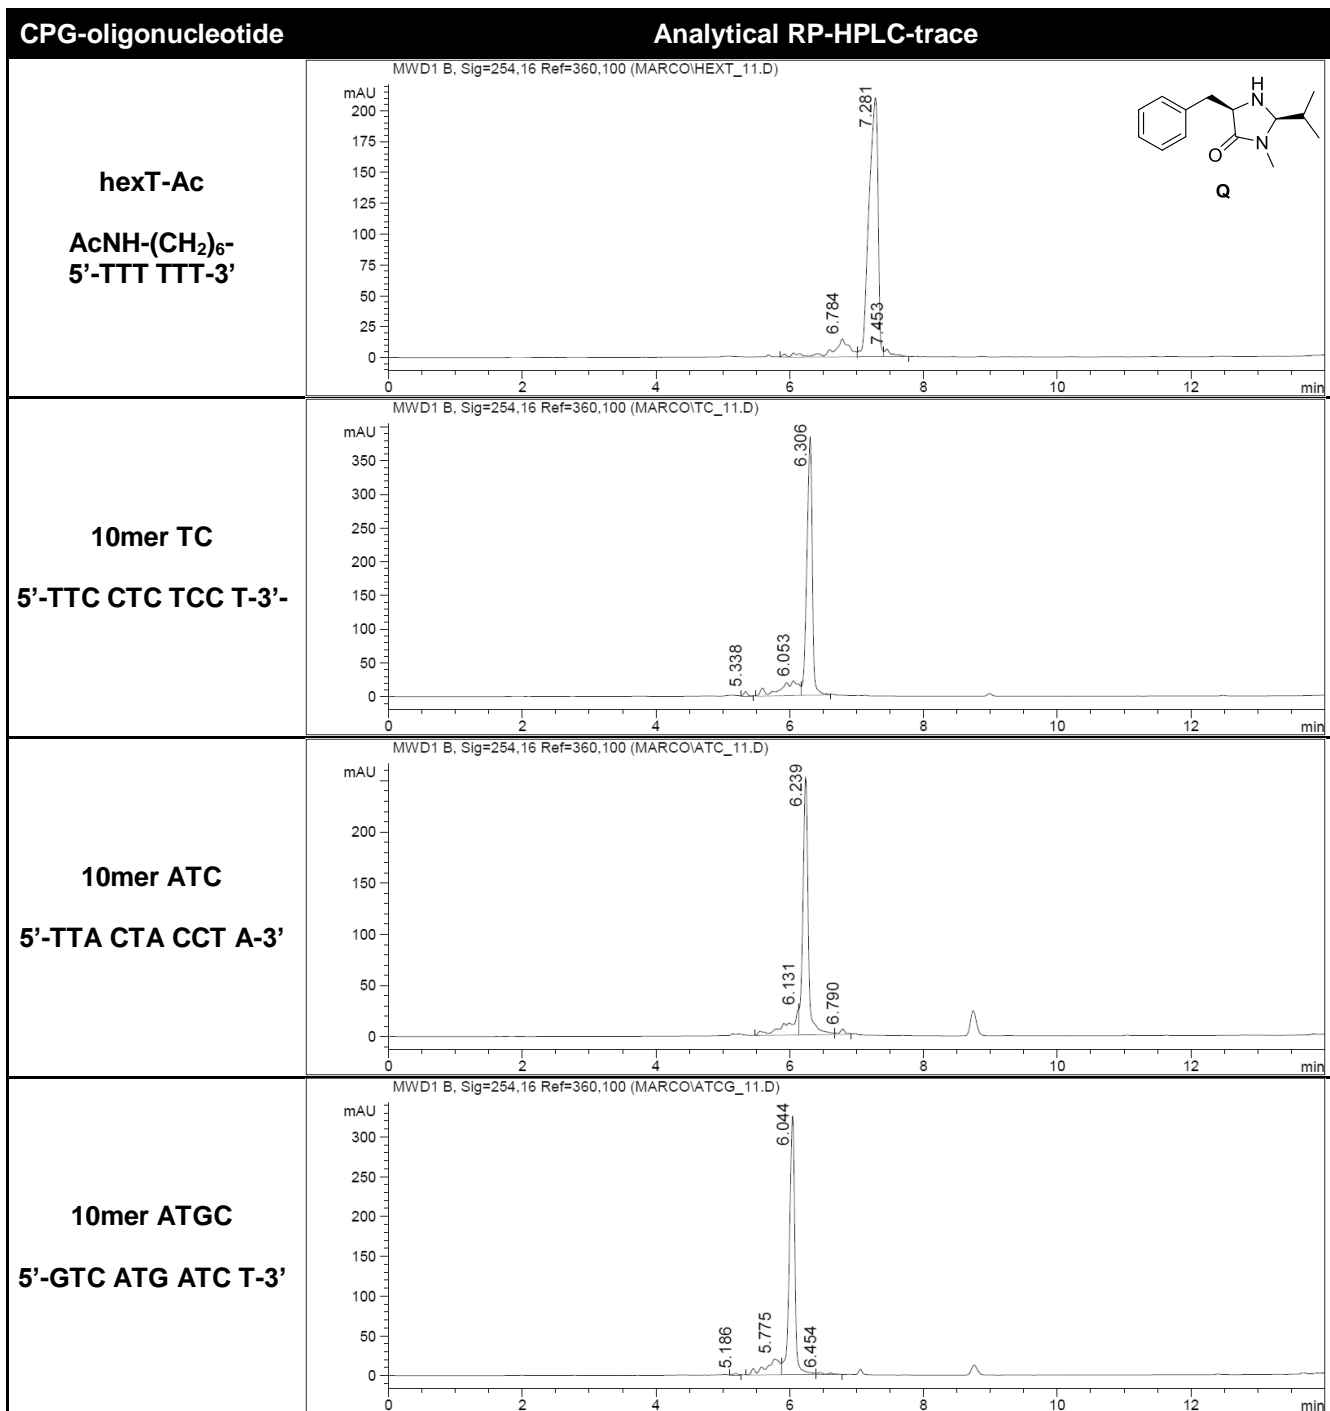

| CPG-oligonucleotide                                                                             | MALDI-MS spectra                                                                                                                                                                                                                                                 |                                                    |
|-------------------------------------------------------------------------------------------------|------------------------------------------------------------------------------------------------------------------------------------------------------------------------------------------------------------------------------------------------------------------|----------------------------------------------------|
| <p><b>hexT-Ac</b></p> <p><b>AcNH-(CH<sub>2</sub>)<sub>6</sub>-</b><br/><b>5'-TTT TTT-3'</b></p> | 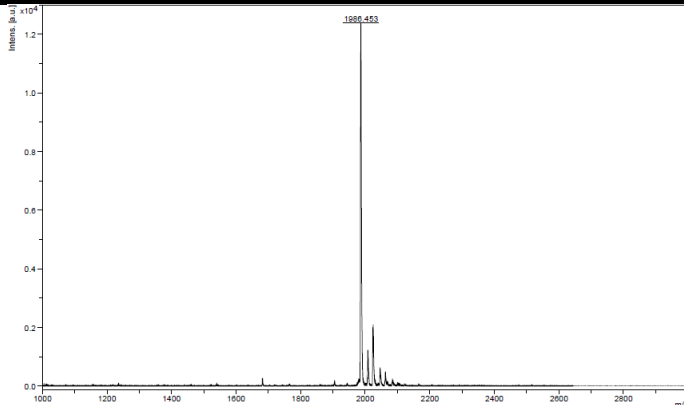 <p>Intensity (a.u.) vs m/z. The x-axis ranges from 1000 to 2800 m/z. The y-axis ranges from 0.0 to 1.2 x 10<sup>4</sup>. A single sharp peak is labeled at 1986.453.</p>      | <p>mass calc. = 1985.4<br/>mass found = 1986.5</p> |
| <p><b>10mer TC</b></p> <p><b>5'-TTC CTC TCC T-3'</b></p>                                        |  <p>Intensity (a.u.) vs m/z. The x-axis ranges from 1000 to 3500 m/z. The y-axis ranges from 0 to 1500. Peaks are labeled at 1186.618, 1445.477, and 2905.908.</p>            | <p>mass calc. = 2904.9<br/>mass found = 2905.9</p> |
| <p><b>10mer ATC</b></p> <p><b>5'-TTA CTA CCT A-3'</b></p>                                       |  <p>Intensity (a.u.) vs m/z. The x-axis ranges from 1000 to 3500 m/z. The y-axis ranges from 0 to 600. Peaks are labeled at 1473.868 and 2961.764.</p>                       | <p>mass calc. = 2962.0<br/>mass found = 2961.8</p> |
| <p><b>10mer ATGC</b></p> <p><b>5'-GTC ATG ATC T-3'</b></p>                                      |  <p>Intensity (a.u.) vs m/z. The x-axis ranges from 1000 to 3500 m/z. The y-axis ranges from 0 to 1250. Peaks are labeled at 1220.838, 1501.978, 1631.927, and 3019.838.</p> | <p>mass calc. = 3019.0<br/>mass found = 3019.8</p> |

## CPG-oligonucleotide + (1*R*,2*R*)-1,2-Bis(2-hydroxyphenyl)ethylenediamine **R**

According to the representative procedure (RP-04) solid support coupled oligonucleotide (20 nmol) was treated with (1*R*,2*R*)-1,2-Bis(2-hydroxyphenyl)ethylenediamine **R** (200 equiv., 4  $\mu$ mol) in dry MeOH.

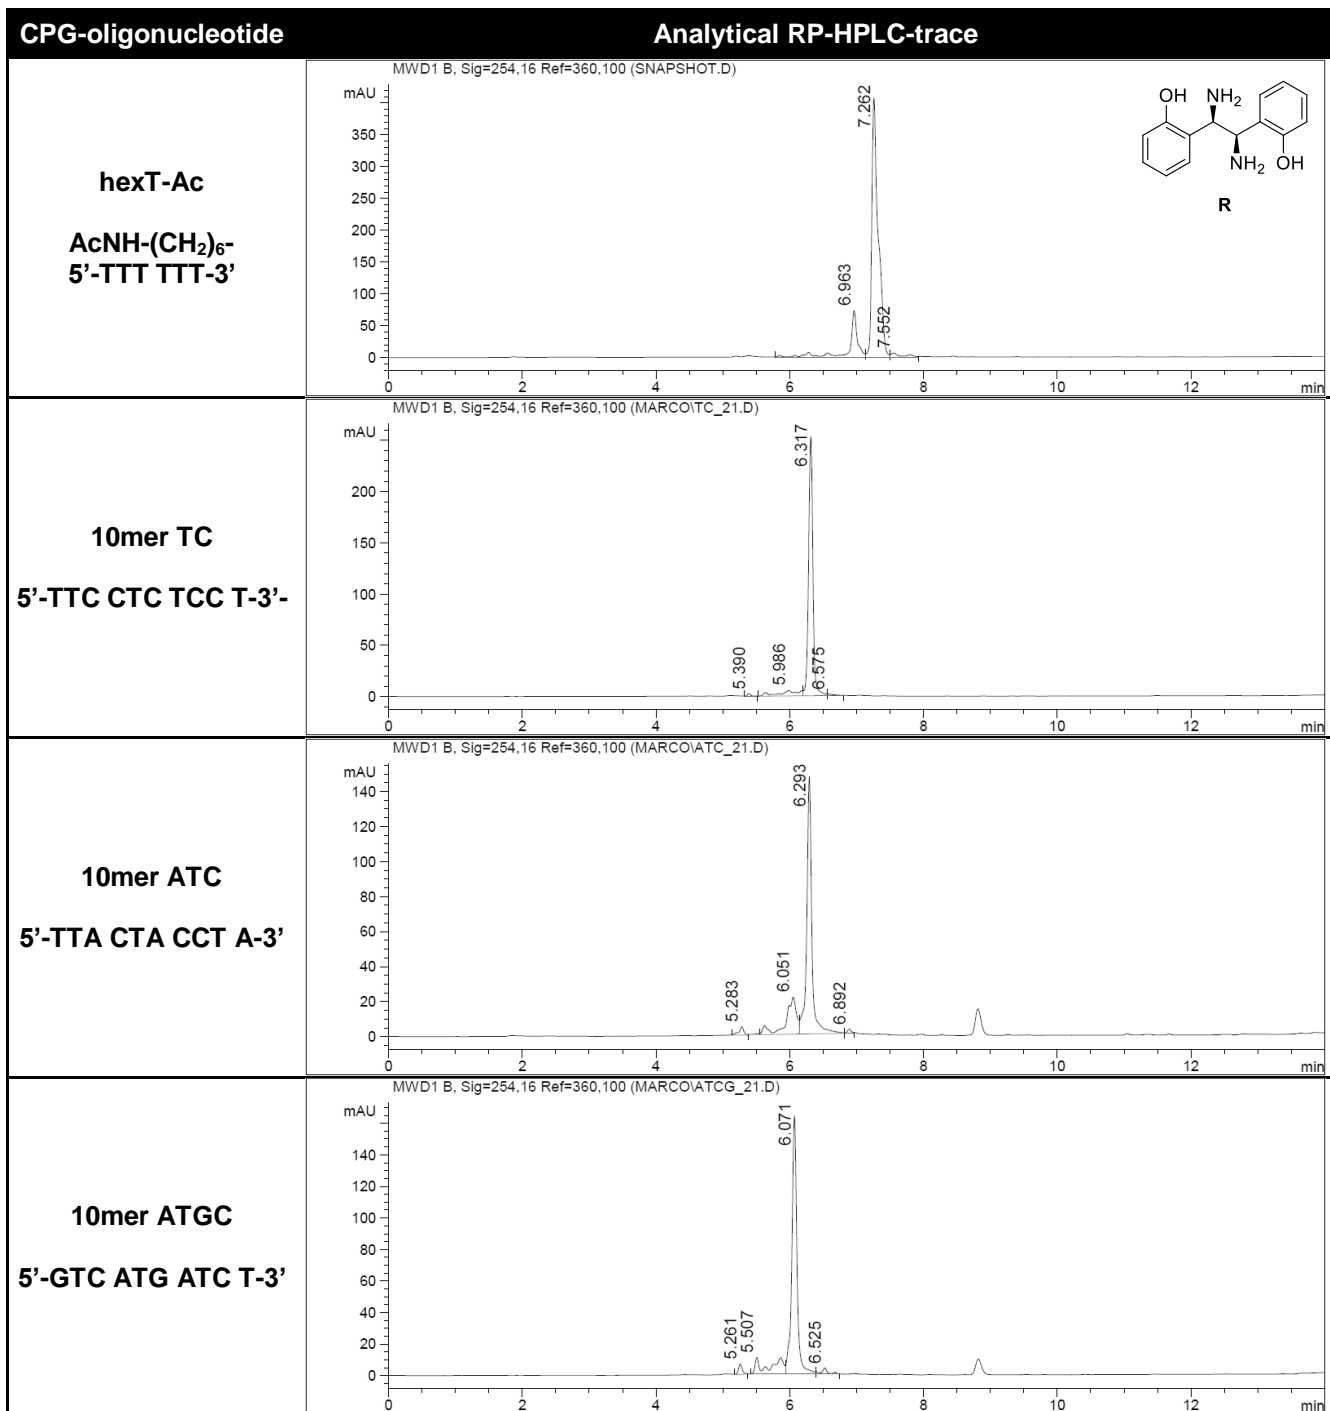

| CPG-oligonucleotide                                                                             | MALDI-MS spectra                                                                                                                                                                                                  |                                                    |
|-------------------------------------------------------------------------------------------------|-------------------------------------------------------------------------------------------------------------------------------------------------------------------------------------------------------------------|----------------------------------------------------|
| <p><b>hexT-Ac</b></p> <p><b>AcNH-(CH<sub>2</sub>)<sub>6</sub>-</b><br/><b>5'-TTT TTT-3'</b></p> | 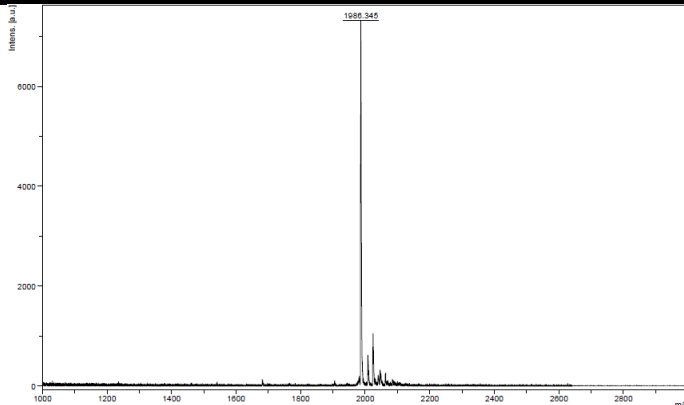 <p>Intensity (a.u.) vs m/z. Major peak at 1986.345.</p>                                                                        | <p>mass calc. = 1985.4<br/>mass found = 1986.3</p> |
| <p><b>10mer TC</b></p> <p><b>5'-TTC CTC TCC T-3'</b></p>                                        |  <p>Intensity (a.u.) vs m/z. Major peak at 2905.470. Other peaks at 1196.943 and 1445.323.</p>                                 | <p>mass calc. = 2904.9<br/>mass found = 2905.5</p> |
| <p><b>10mer ATC</b></p> <p><b>5'-TTA CTA CCT A-3'</b></p>                                       |  <p>Intensity (a.u.) vs m/z. Major peak at 2961.756. Other peaks at 1214.171, 1491.687, 1831.424, 2120.864, and 2649.354.</p> | <p>mass calc. = 2962.0<br/>mass found = 2961.8</p> |
| <p><b>10mer ATGC</b></p> <p><b>5'-GTC ATG ATC T-3'</b></p>                                      |  <p>Intensity (a.u.) vs m/z. Major peak at 3018.584. Other peaks at 1226.677, 1501.675, and 1775.983.</p>                     | <p>mass calc. = 3019.0<br/>mass found = 3018.6</p> |

## CPG-oligonucleotide + (*R,R*)-2,6-Bis(4-phenyl-2-oxazolin-2-yl)pyridine **F**

According to the representative procedure (RP-04) solid support coupled oligonucleotide (20 nmol) was treated with (*R,R*)-2,6-Bis(4-phenyl-2-oxazolin-2-yl)pyridine **F** (200 equiv., 4  $\mu$ mol) in dry ACN.

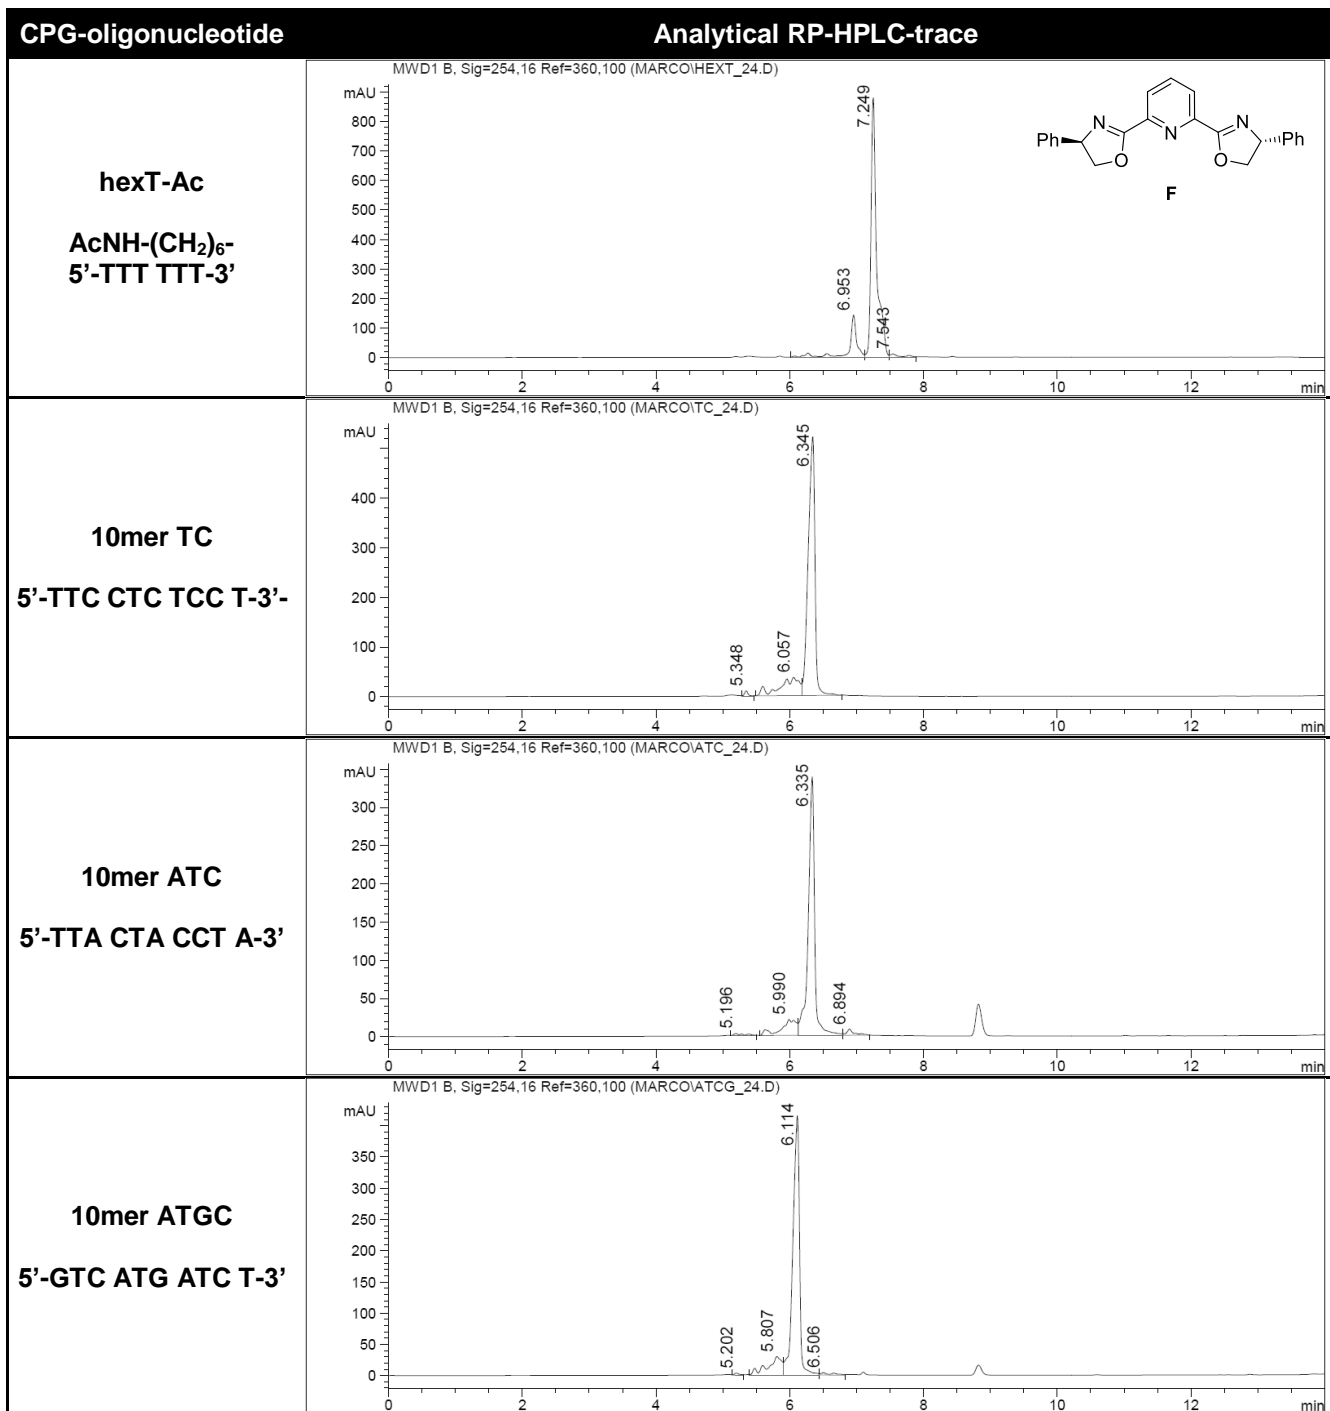



## CPG-oligonucleotide

## MALDI-MS spectra

**hexT-Ac****AcNH-(CH<sub>2</sub>)<sub>6</sub>-  
5'-TTT TTT-3'**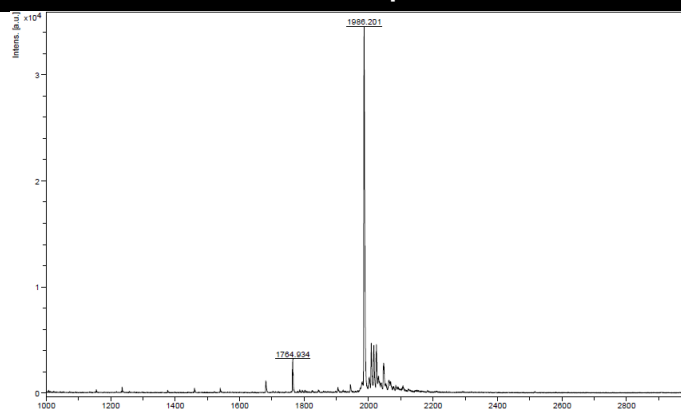mass calc. = 1985.4  
mass found = 1986.2**10mer TC****5'-TTC CTC TCC T-3'**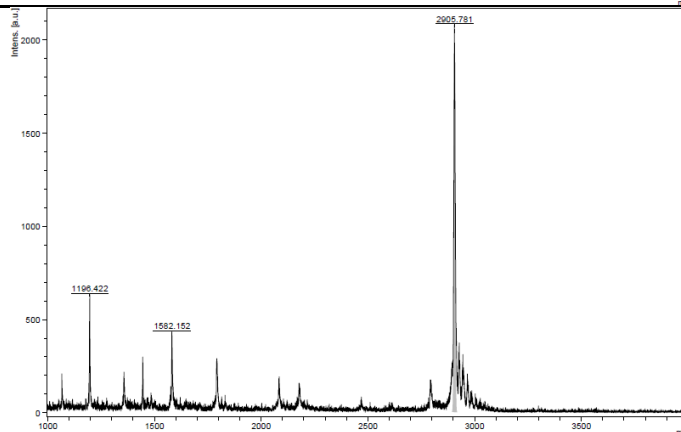mass calc. = 2904.9  
mass found = 2905.8**10mer ATC****5'-TTA CTA CCT A-3'**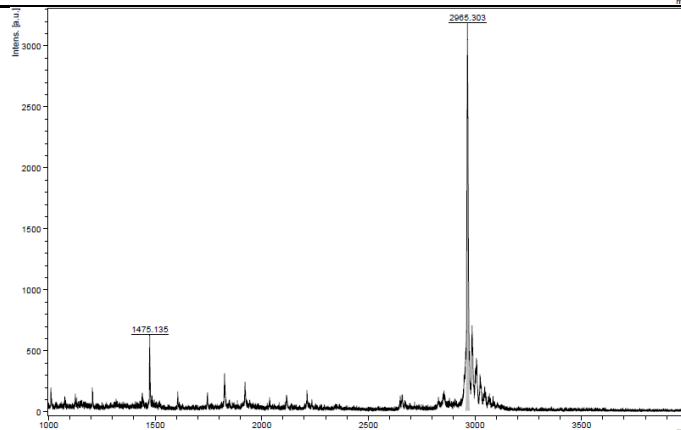mass calc. = 2962.0  
mass found = 2965.3**10mer ATGC****5'-GTC ATG ATC T-3'**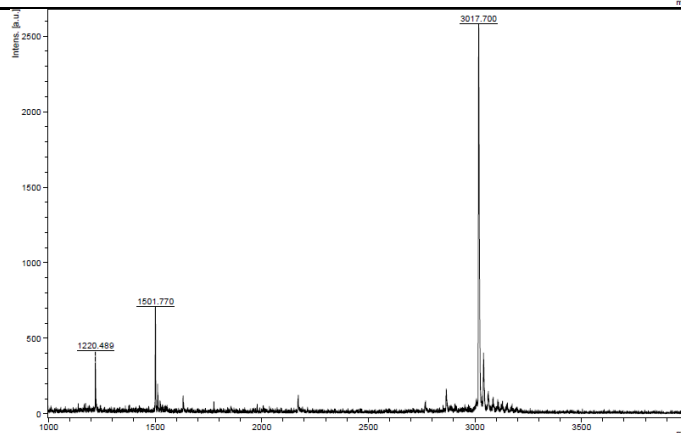mass calc. = 3019.0  
mass found = 3017.7

## CPG-oligonucleotide + *N,N*-bis[3,5-bis(trifluoromethyl)phenyl]-thiourea **S**

According to the representative procedure (RP-04) solid support coupled oligonucleotide (20 nmol) was treated with *N,N*-bis[3,5-bis(trifluoromethyl)phenyl]-thiourea **S** (200 equiv., 4  $\mu$ mol) in dry MeOH.

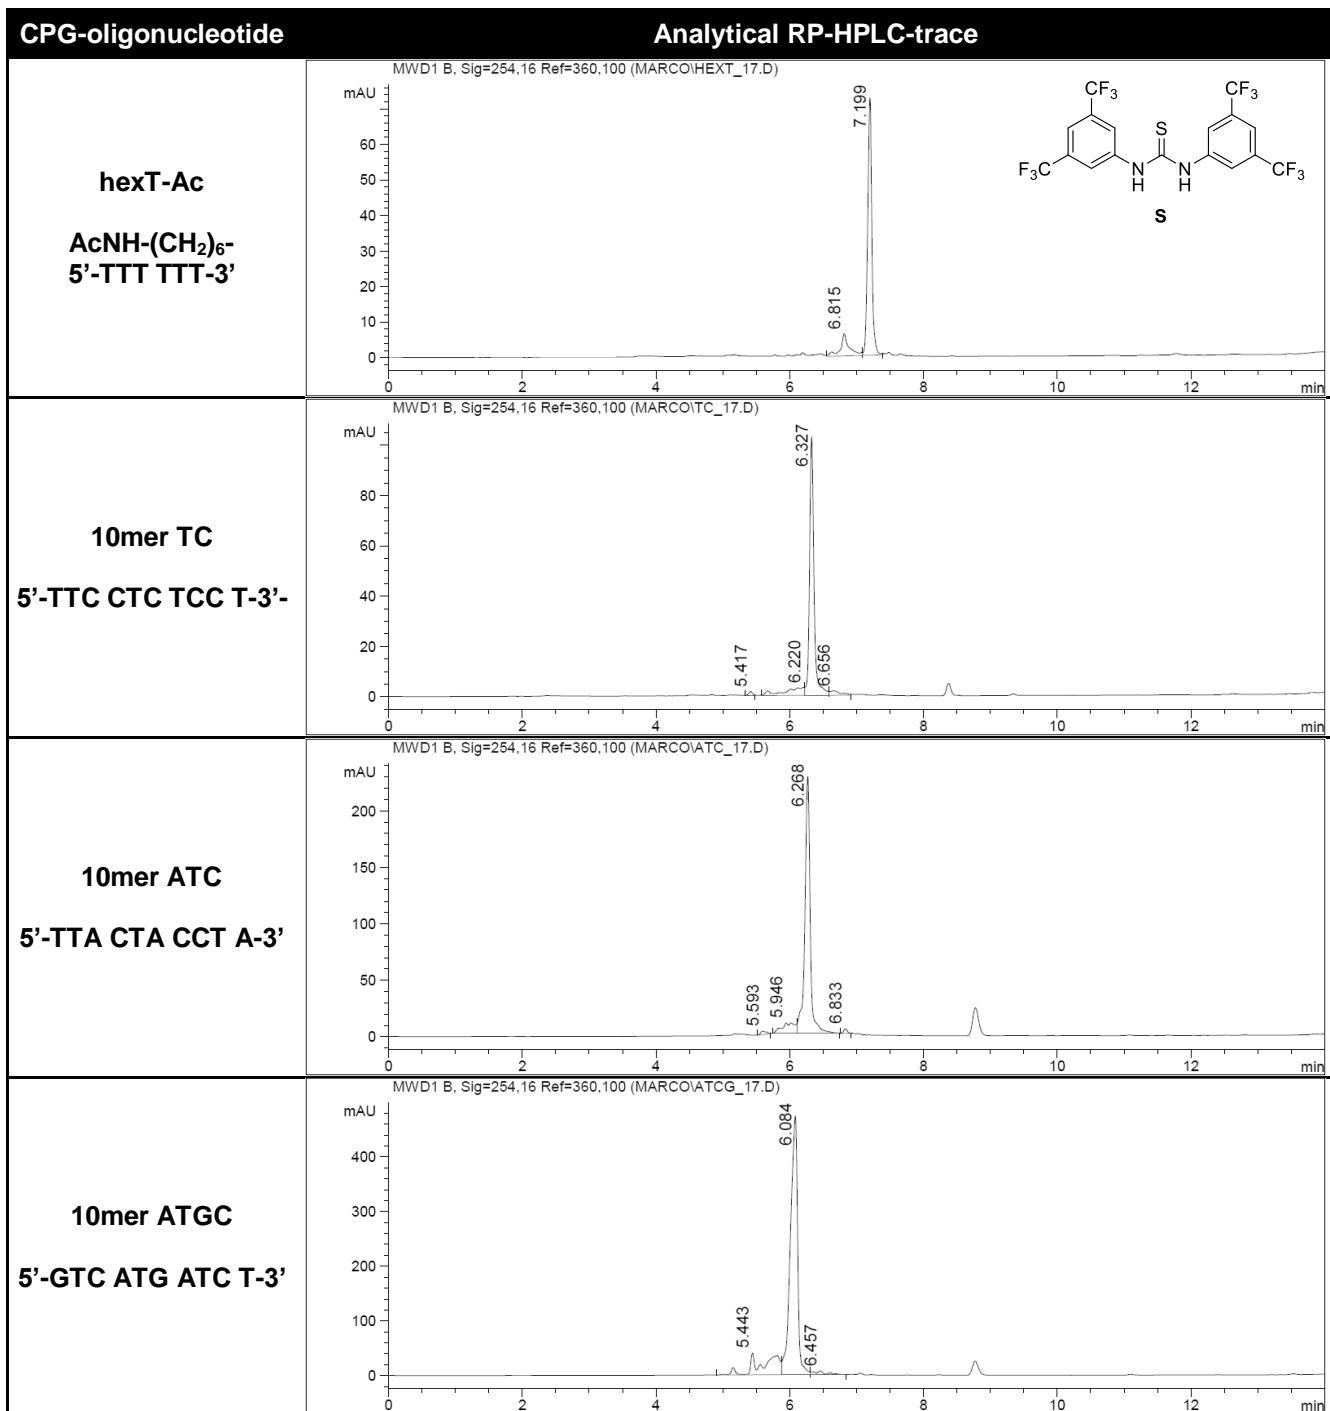

| CPG-oligonucleotide                                                                             | MALDI-MS spectra                                                                                                                                                                                                                                                                                                                                                                                                                                                                                          |                                                    |
|-------------------------------------------------------------------------------------------------|-----------------------------------------------------------------------------------------------------------------------------------------------------------------------------------------------------------------------------------------------------------------------------------------------------------------------------------------------------------------------------------------------------------------------------------------------------------------------------------------------------------|----------------------------------------------------|
| <p><b>hexT-Ac</b></p> <p><b>AcNH-(CH<sub>2</sub>)<sub>6</sub>-</b><br/><b>5'-TTT TTT-3'</b></p> | 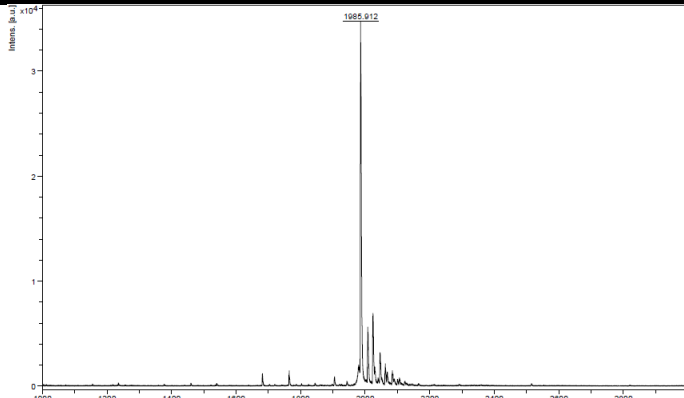 <p>The spectrum shows a single prominent peak at m/z 1985.912. The y-axis is labeled 'Intensity [a.u.]' and ranges from 0 to 3. The x-axis is labeled 'm/z' and ranges from 1000 to 2800.</p>                                                                                                                                                                                                                          | <p>mass calc. = 1985.4<br/>mass found = 1985.9</p> |
| <p><b>10mer TC</b></p> <p><b>5'-TTC CTC TCC T-3'</b></p>                                        |  <p>The spectrum shows two major peaks. The first peak is at m/z 1444.945 with an intensity of approximately 700. The second, larger peak is at m/z 2905.003 with an intensity of approximately 1200. The y-axis is labeled 'Intensity [a.u.]' and ranges from 0 to 1200. The x-axis is labeled 'm/z' and ranges from 1000 to 3500.</p>                                                                                | <p>mass calc. = 2904.9<br/>mass found = 2905.0</p> |
| <p><b>10mer ATC</b></p> <p><b>5'-TTA CTA CCT A-3'</b></p>                                       |  <p>The spectrum shows two major peaks. The first peak is at m/z 1474.277 with an intensity of approximately 250. The second, larger peak is at m/z 2963.752 with an intensity of approximately 800. The y-axis is labeled 'Intensity [a.u.]' and ranges from 0 to 800. The x-axis is labeled 'm/z' and ranges from 1000 to 3500.</p>                                                                                 | <p>mass calc. = 2962.0<br/>mass found = 2963.8</p> |
| <p><b>10mer ATGC</b></p> <p><b>5'-GTC ATG ATC T-3'</b></p>                                      |  <p>The spectrum shows three major peaks. The first peak is at m/z 1220.455 with an intensity of approximately 2000. The second peak is at m/z 1831.282 with an intensity of approximately 500. The third, largest peak is at m/z 3018.900 with an intensity of approximately 3000. The y-axis is labeled 'Intensity [a.u.]' and ranges from 0 to 3000. The x-axis is labeled 'm/z' and ranges from 1000 to 3500.</p> | <p>mass calc. = 3019.0<br/>mass found = 3018.9</p> |

**CPG-oligonucleotide + 2,3-Dichloro-5,6-dicyano-1,4-benzoquinone T**

According to the representative procedure (RP-04) solid support coupled oligonucleotide (20 nmol) was treated with 2,3-Dichloro-5,6-dicyano-1,4-benzoquinone **T** (200 equiv., 4  $\mu$ mol) in dry EtOH.

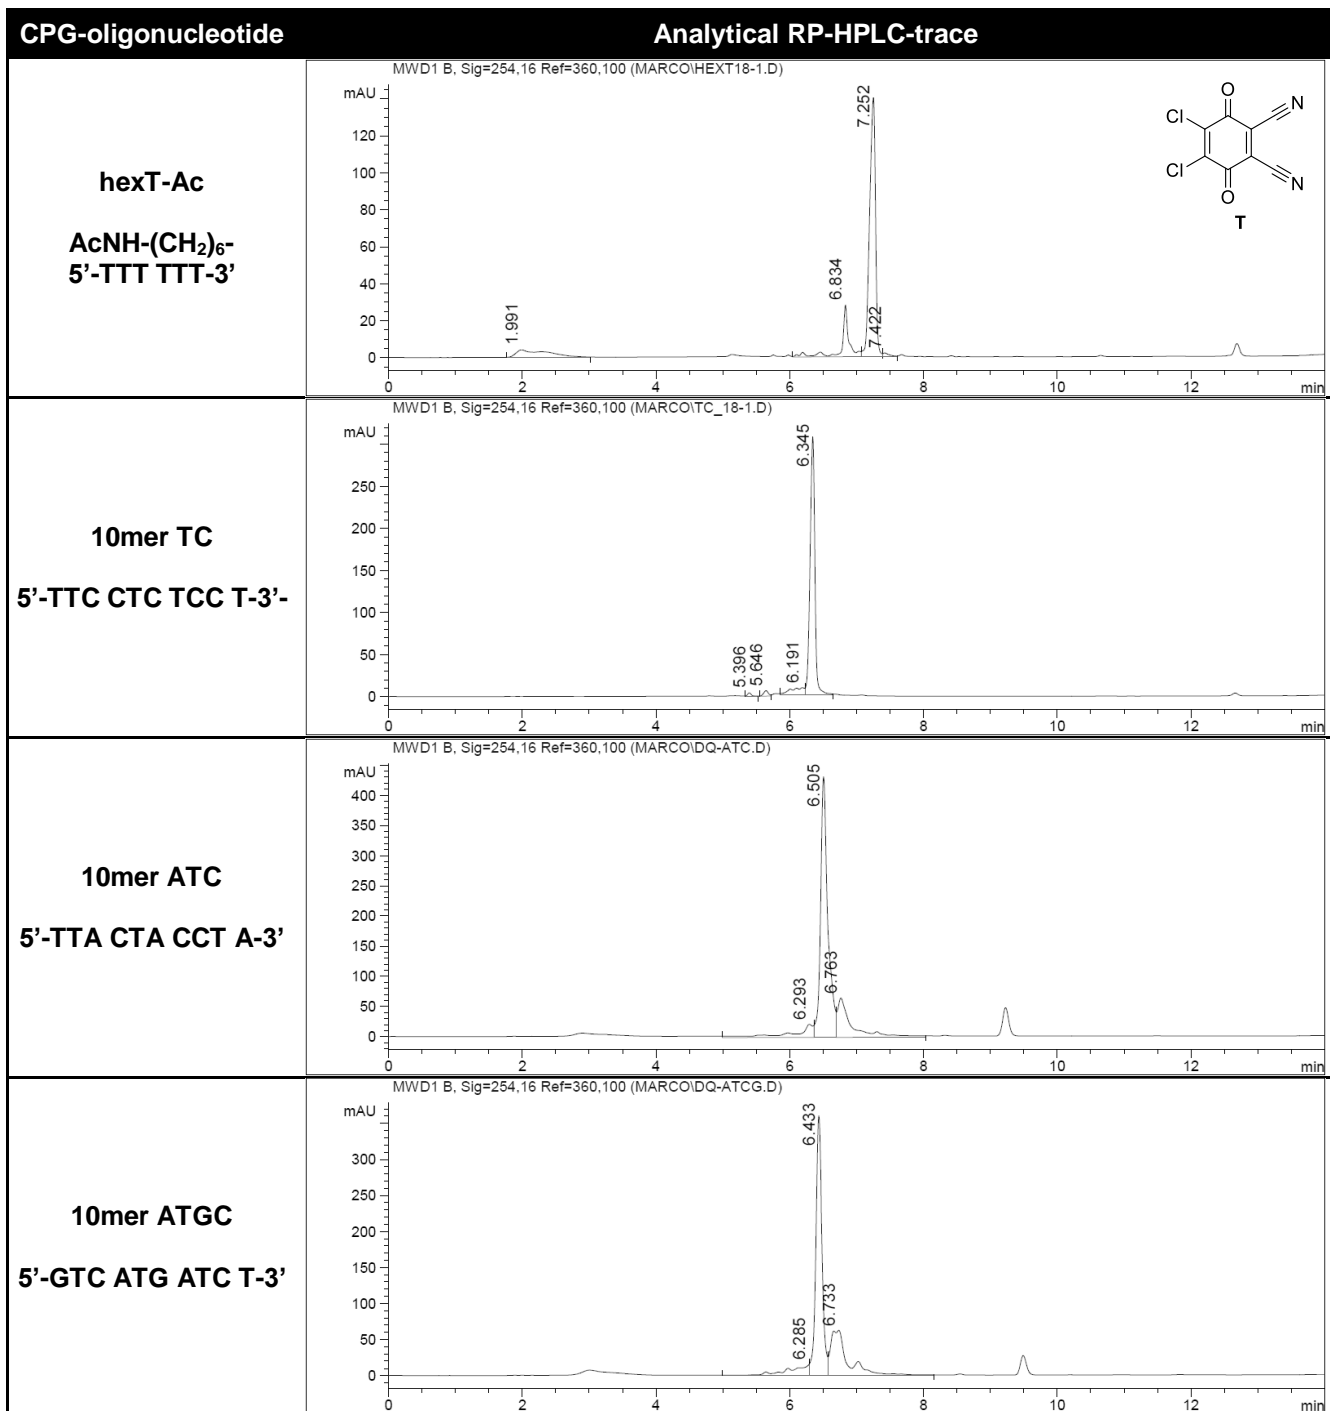

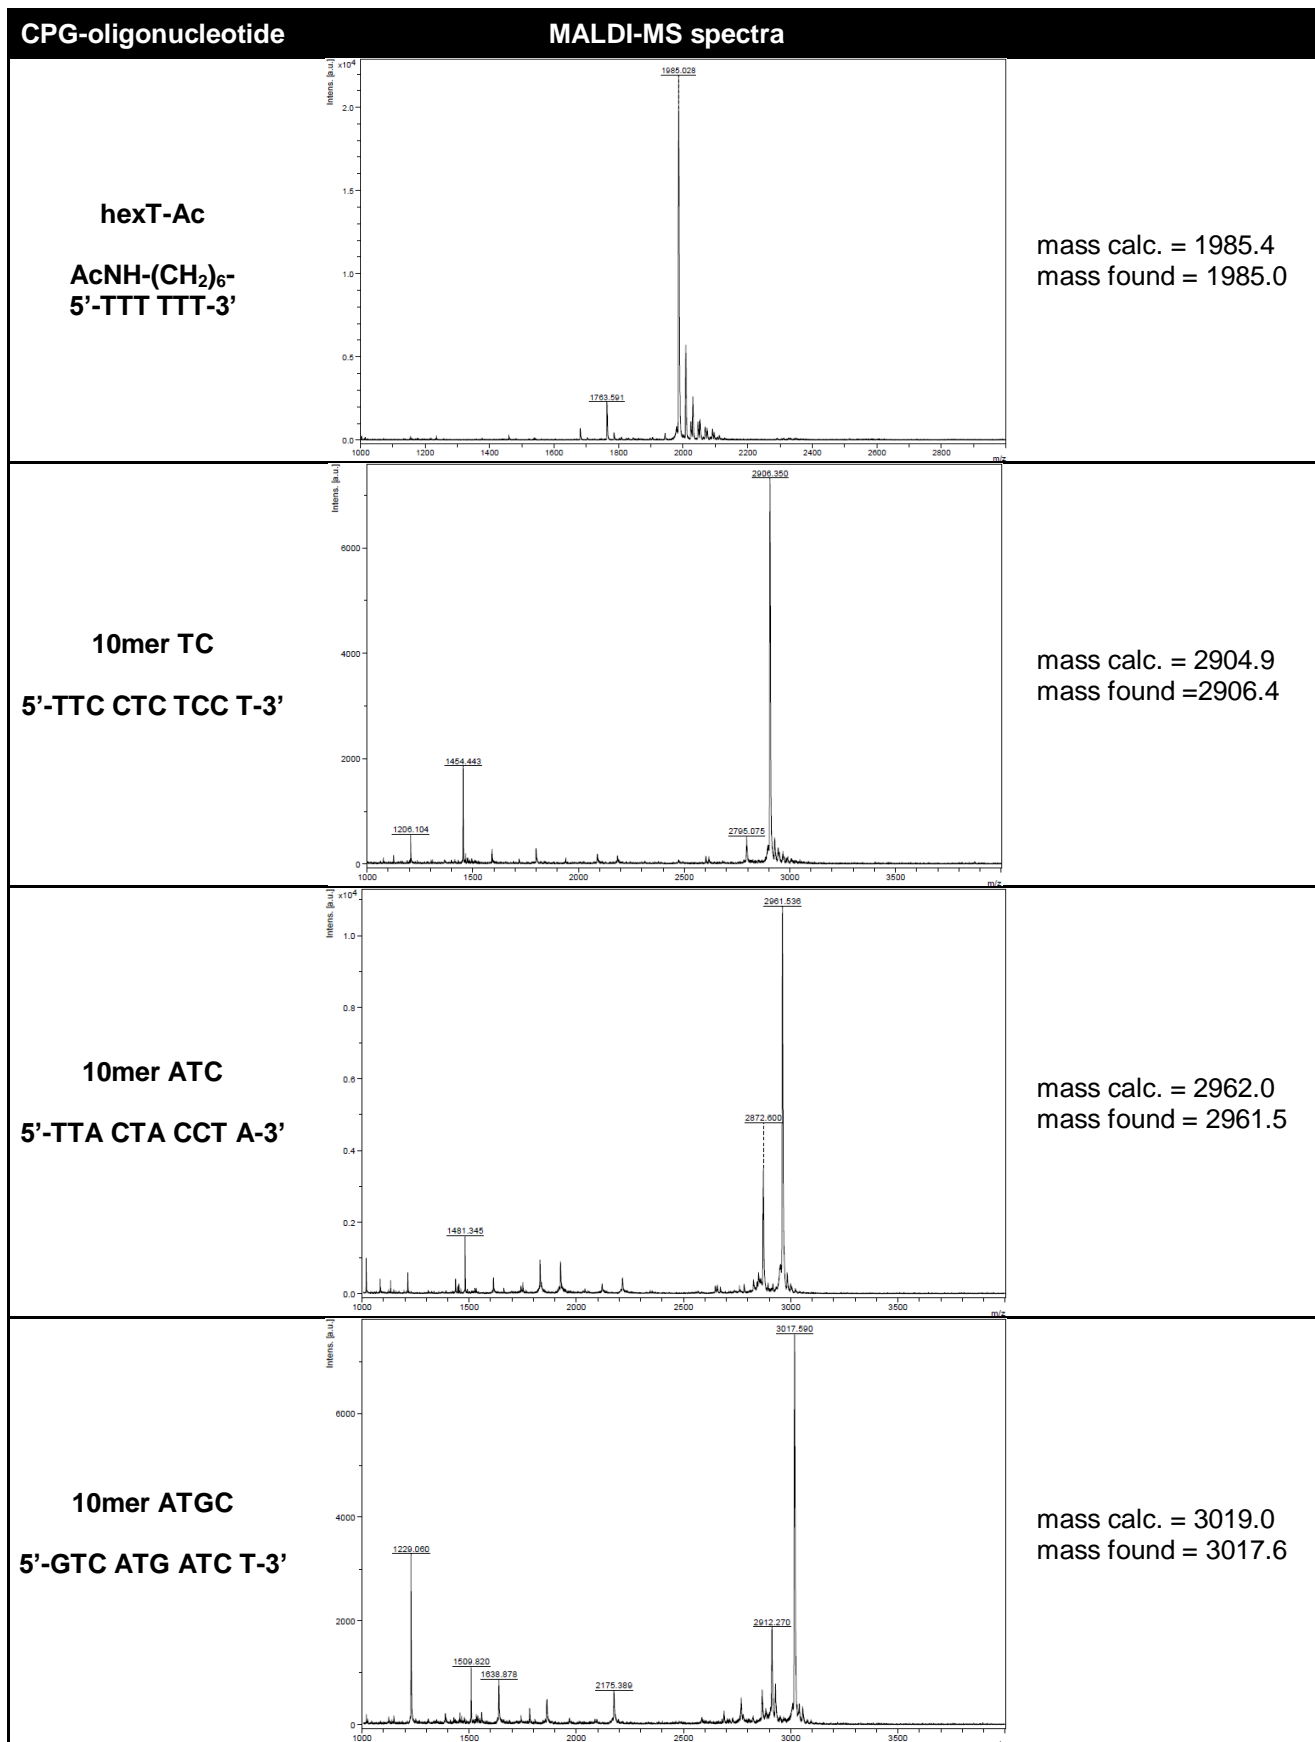

## CPG-oligonucleotide + (2,2,6,6-Tetramethylpiperidin-1-yl)oxyl **G**

According to the representative procedure (RP-04) solid support coupled oligonucleotide (20 nmol) was treated with (2,2,6,6-Tetramethylpiperidin-1-yl)oxyl **G** (200 equiv., 4  $\mu$ mol) in dry ACN.

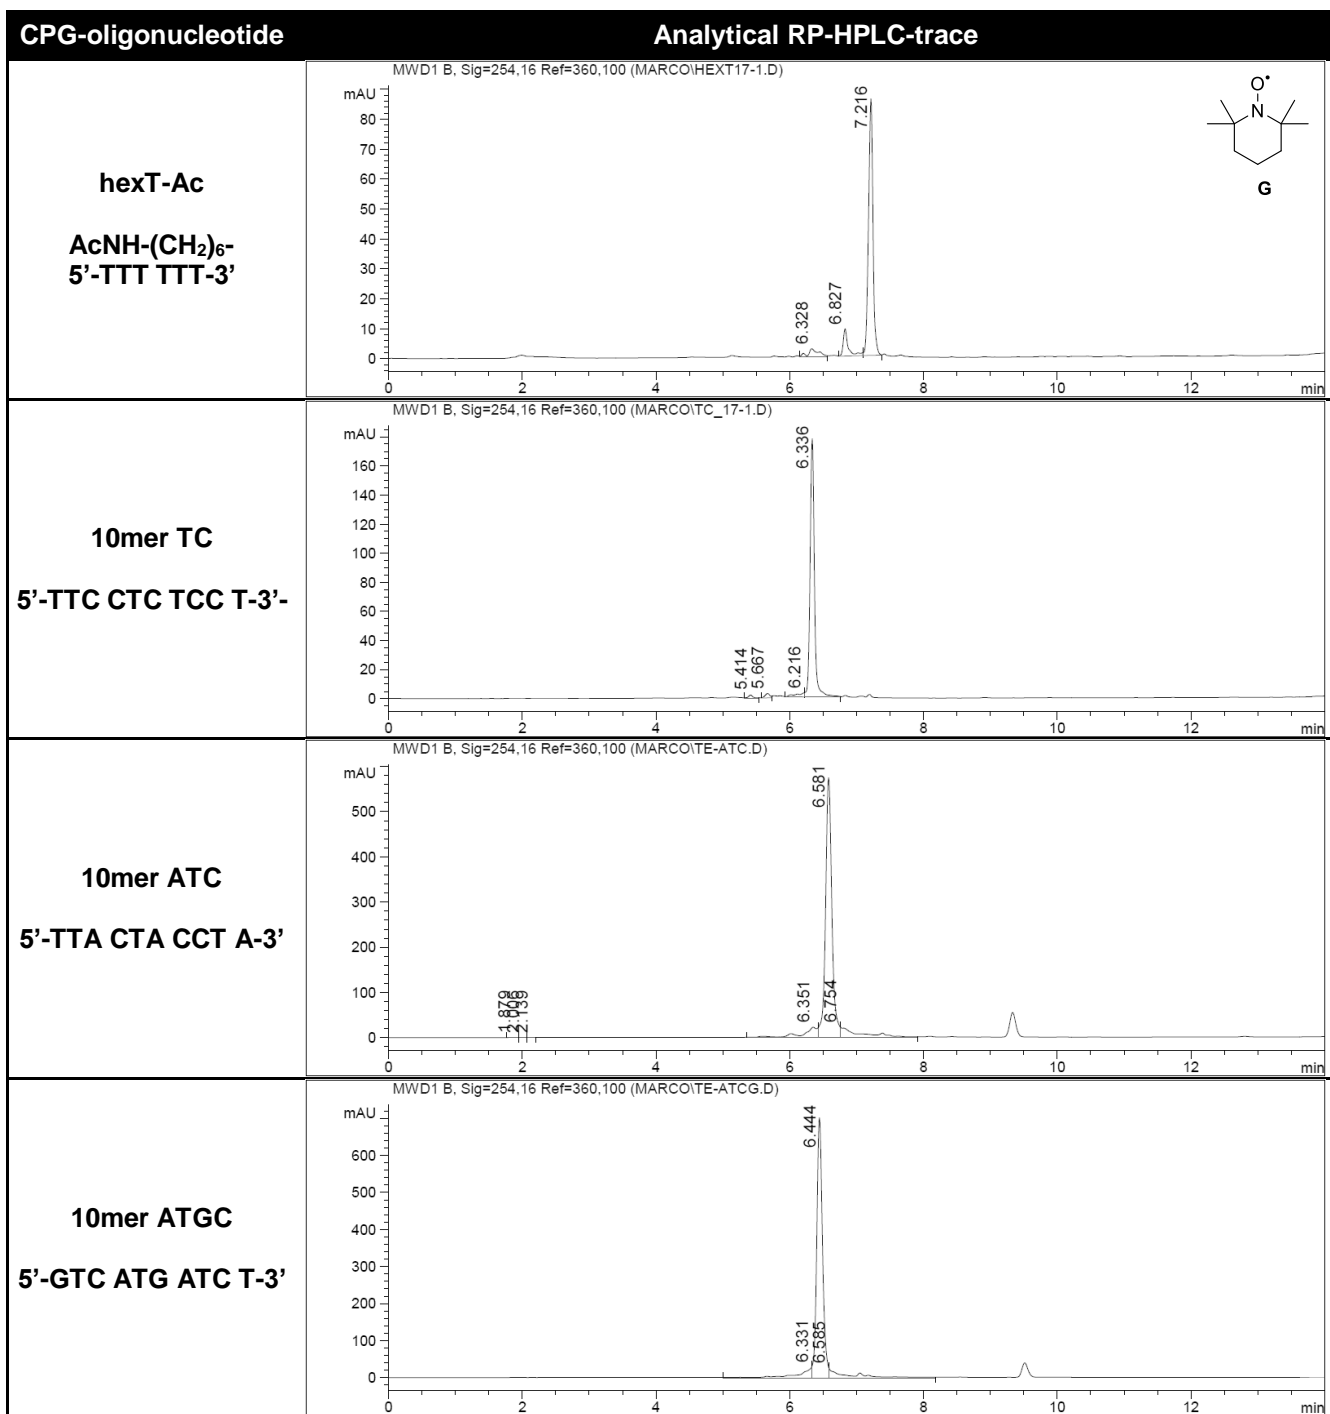

| CPG-oligonucleotide                                                                             | MALDI-MS spectra                                                                     |                                                    |
|-------------------------------------------------------------------------------------------------|--------------------------------------------------------------------------------------|----------------------------------------------------|
| <p><b>hexT-Ac</b></p> <p><b>AcNH-(CH<sub>2</sub>)<sub>6</sub>-</b><br/><b>5'-TTT TTT-3'</b></p> | 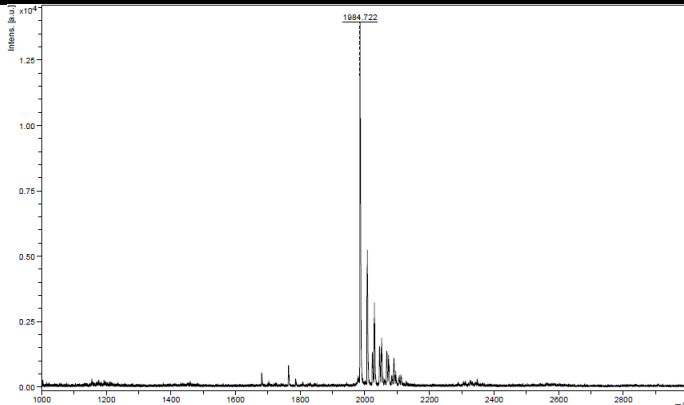   | <p>mass calc. = 1985.4<br/>mass found = 1984.7</p> |
| <p><b>10mer TC</b></p> <p><b>5'-TTC CTC TCC T-3'</b></p>                                        |   | <p>mass calc. = 2904.9<br/>mass found = 2904.8</p> |
| <p><b>10mer ATC</b></p> <p><b>5'-TTA CTA CCT A-3'</b></p>                                       |  | <p>mass calc. = 2962.0<br/>mass found = 2961.7</p> |
| <p><b>10mer ATGC</b></p> <p><b>5'-GTC ATG ATC T-3'</b></p>                                      |  | <p>mass calc. = 3019.0<br/>mass found = 3018.7</p> |

## CPG-oligonucleotide + (Diacetoxyiodo)benzene H

According to the representative procedure (RP-04) solid support coupled oligonucleotide (20 nmol) was treated with (Diacetoxyiodo)benzene **H** (200 equiv., 4  $\mu$ mol) in dry ACN.

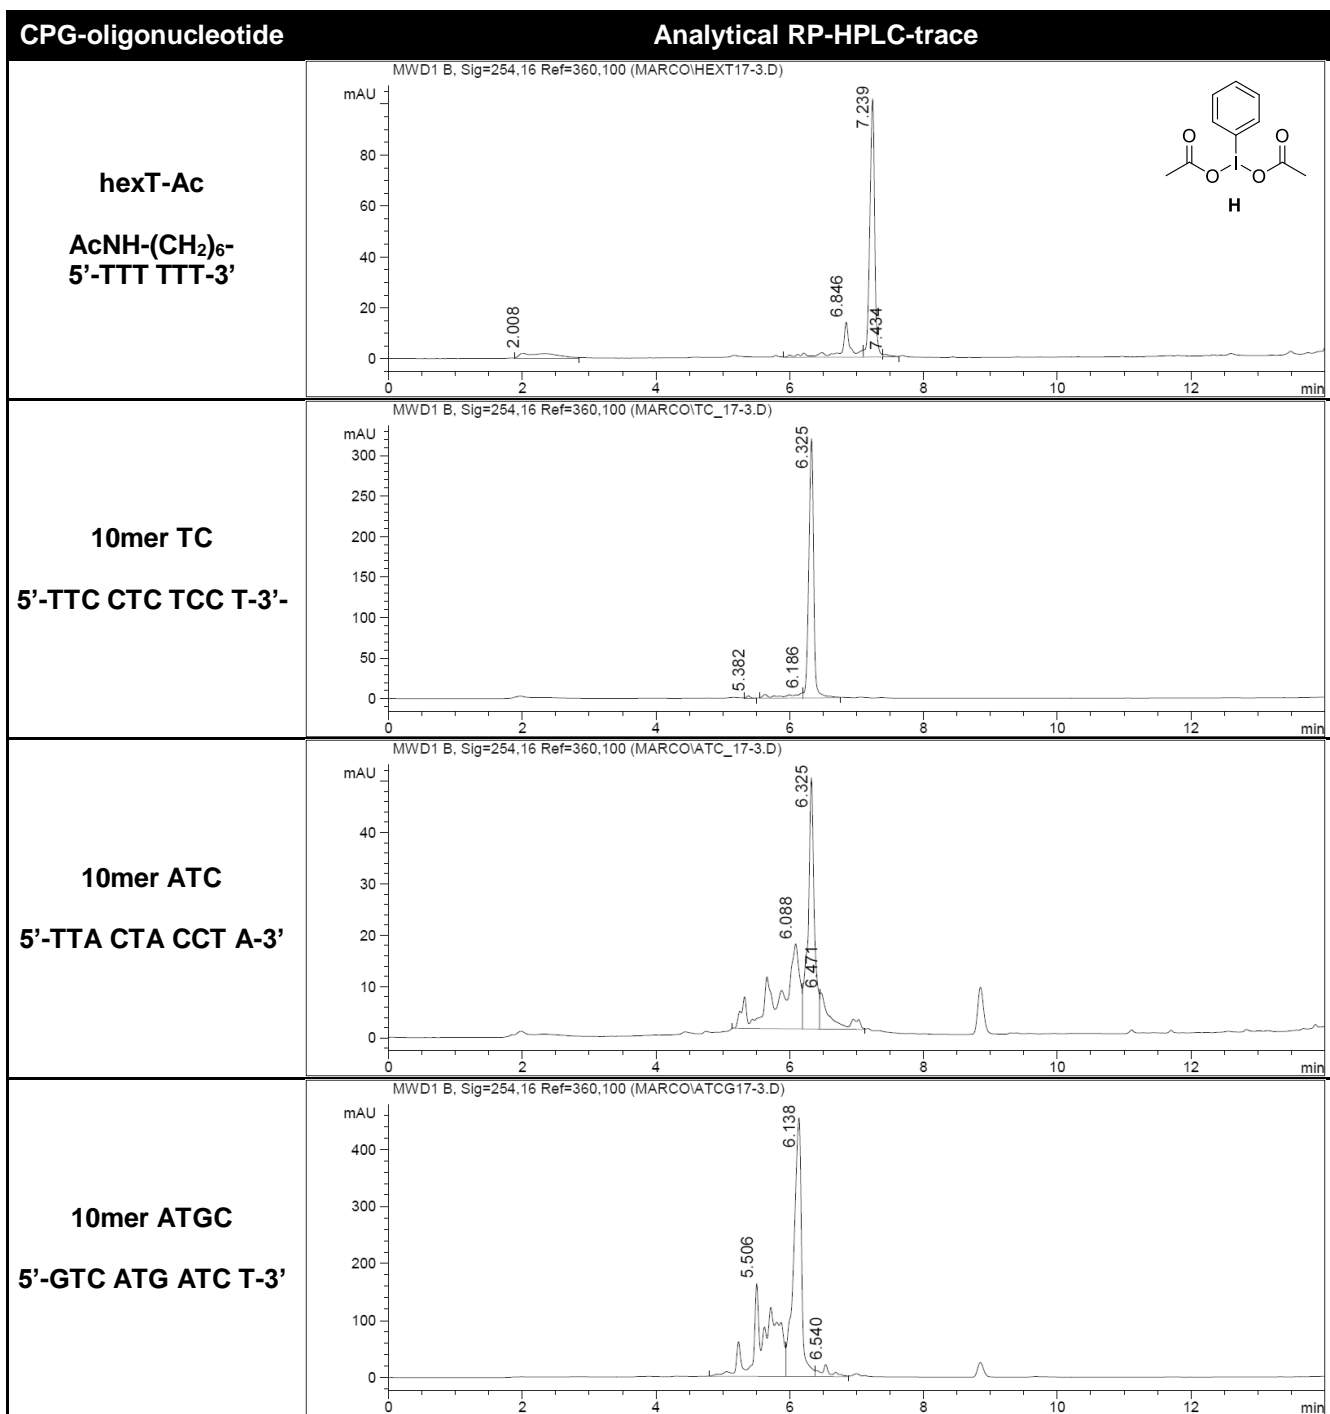



## CPG-oligonucleotide

## MALDI-MS spectra

**hexT-Ac****AcNH-(CH<sub>2</sub>)<sub>6</sub>-  
5'-TTT TTT-3'**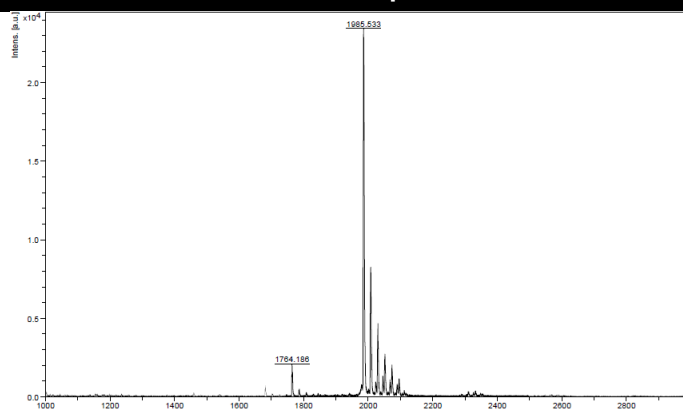mass calc. = 1985.4  
mass found = 1985.5**10mer TC****5'-TTC CTC TCC T-3'**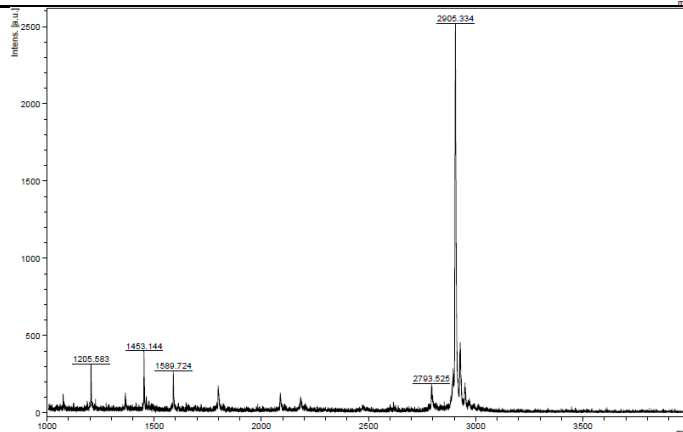mass calc. = 2904.9  
mass found = 2905.3**10mer ATC****5'-TTA CTA CCT A-3'**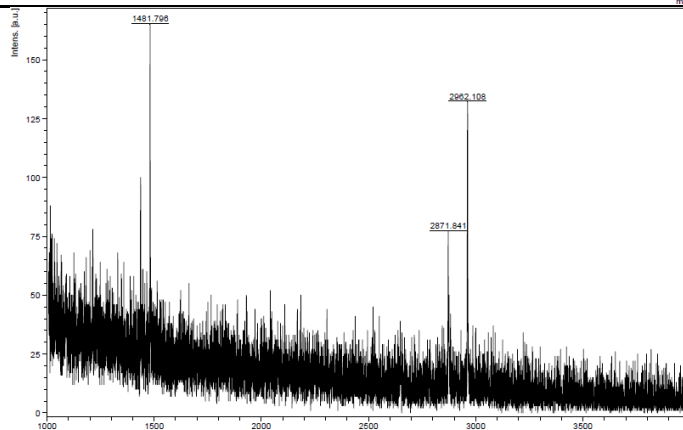mass calc. = 2962.0  
mass found = 2962.1**10mer ATGC****5'-GTC ATG ATC T-3'**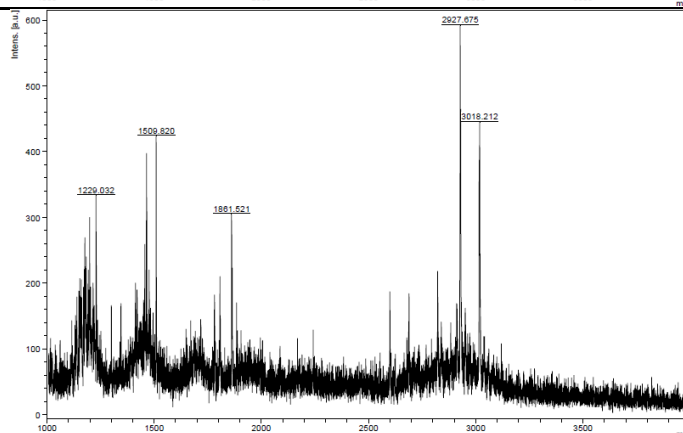mass calc. = 3019.0  
mass found = 3018.2

## Synthesis of CPG-coupled oligonucleotide-aldehyde and -aniline conjugates

**DNA conjugate 11:** Following DMT removal, CPG-coupled hexT-C<sub>6</sub>-NH<sub>2</sub> was reacted with 2-(4-formylphenoxy)acetic acid according to RP-06.

### HPLC trace of crude reaction mixture 11 (Analytical RP-HPLC, Method-I)

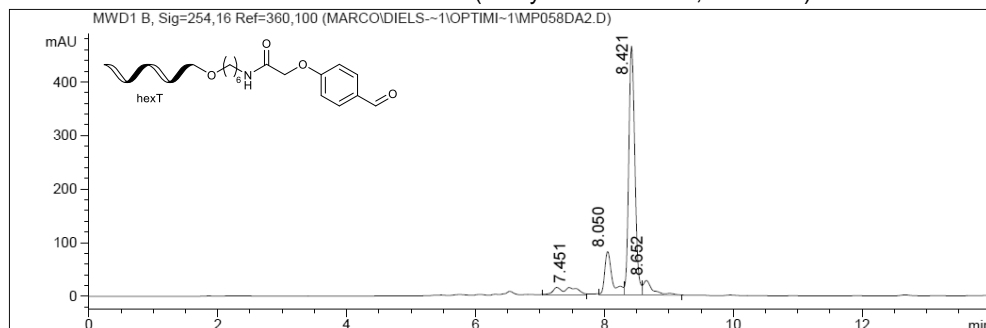

Peak list:

| Ret. Time | Width min | Height  | Area     | Area % |
|-----------|-----------|---------|----------|--------|
| 7.451     | 0.380     | 13.568  | 309.446  | 6.985  |
| 8.050     | 0.140     | 81.005  | 680.467  | 15.360 |
| 8.421     | 0.113     | 465.707 | 3157.925 | 71.284 |
| 8.652     | 0.172     | 27.277  | 282.228  | 6.371  |

### HPLC trace of crude reaction mixture 11 (Analytical RP-HPLC, Method-III)

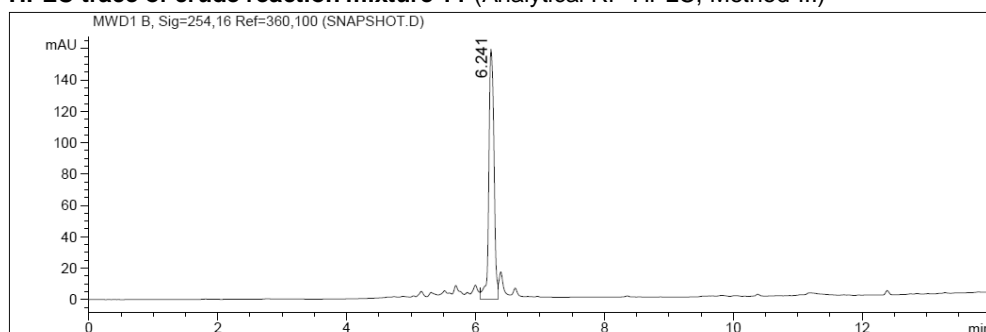

Peak list:

| Ret. Time | Width min | Height  | Area    | Area %  |
|-----------|-----------|---------|---------|---------|
| 6.241     | 0.089     | 159.216 | 887.480 | 100.000 |

### MALDI-MS spectrum of crude reaction mixture 11

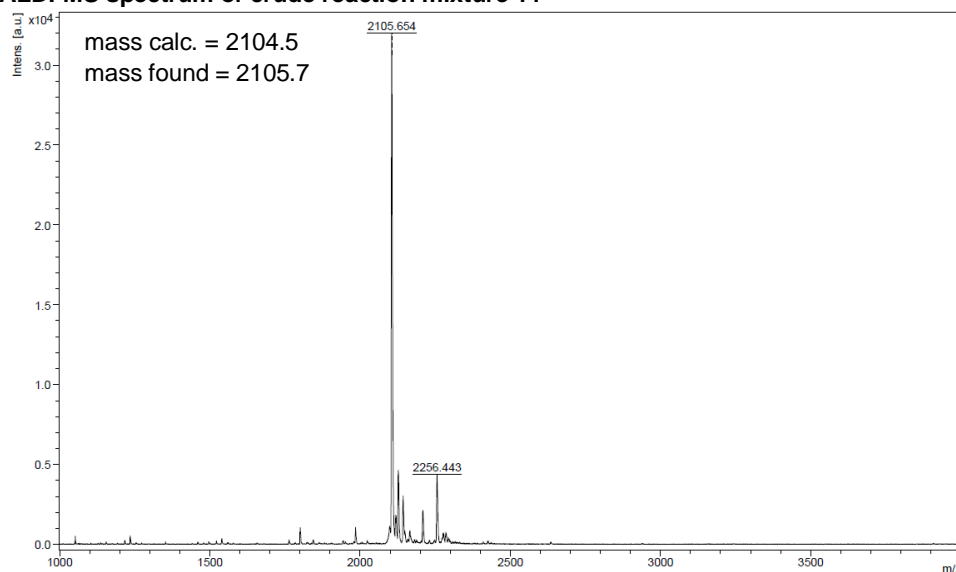

**DNA conjugate 15a:** Following DMT removal, CPG-coupled 10mer ATGC-C<sub>6</sub>-NH<sub>2</sub> was reacted with 2-(4-formylphenoxy)acetic acid according to RP-06.

**HPLC trace of crude reaction mixture 15a (Analytical RP-HPLC, Method-II)**

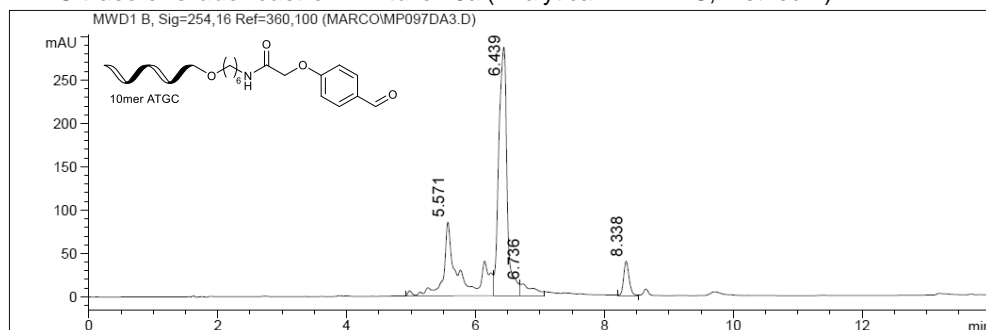

Peak list:

| Ret. Time | Width min | Height  | Area     | Area % |
|-----------|-----------|---------|----------|--------|
| 5.571     | 0.289     | 85.209  | 1478.684 | 32.859 |
| 6.439     | 0.151     | 287.006 | 2591.899 | 57.597 |
| 6.736     | 0.244     | 13.652  | 199.884  | 4.442  |
| 8.338     | 0.096     | 39.738  | 229.610  | 5.102  |

**MALDI-MS spectrum of crude reaction mixture 15a**

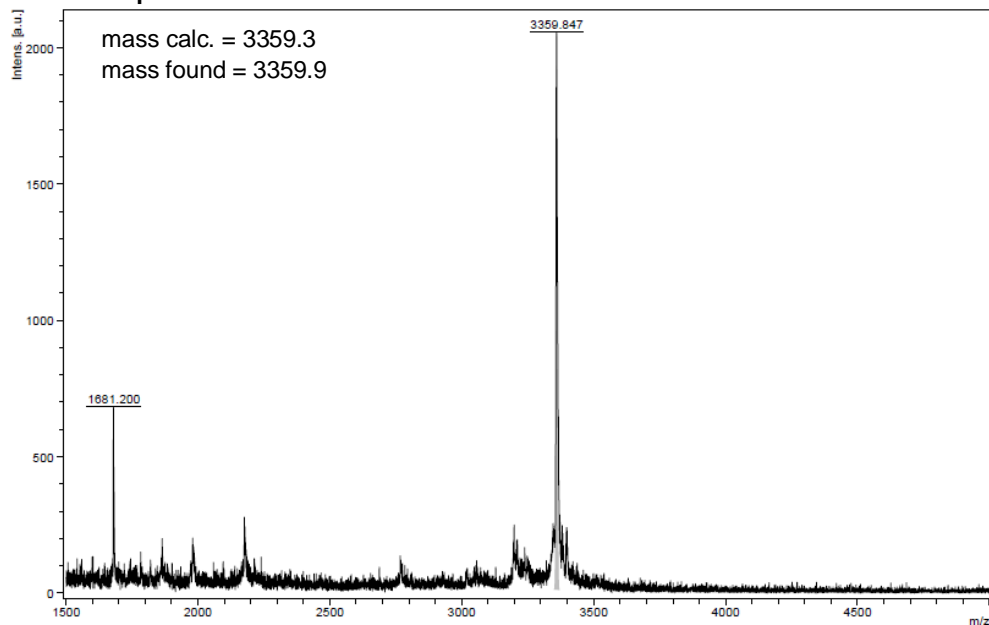

**DNA conjugate 15b:** Following DMT removal, CPG-coupled 10mer ATGC-C<sub>6</sub>-NH<sub>2</sub> was reacted with 2-(2-chloro-4-formylphenoxy)acetic acid according to RP-06.

**HPLC trace of crude reaction mixture 15b (Analytical RP-HPLC, Method-II)**

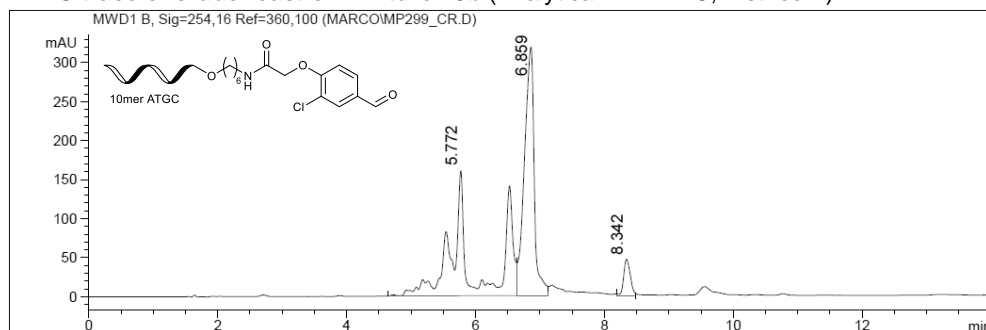

Peak list:

| Ret. Time | Width min | Height  | Area     | Area % |
|-----------|-----------|---------|----------|--------|
| 5.772     | 0.363     | 160.782 | 3497.436 | 48.597 |
| 6.859     | 0.176     | 318.828 | 3368.118 | 46.800 |
| 8.342     | 0.119     | 46.536  | 331.252  | 4.603  |

**MALDI-MS spectrum of crude reaction mixture 15b**

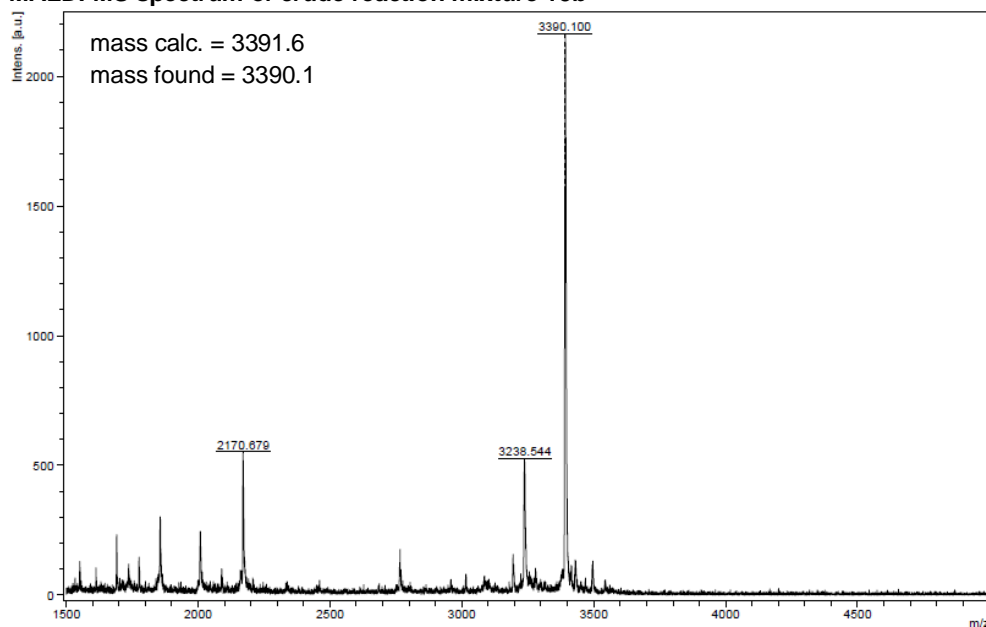

**DNA conjugate 15c:** Following DMT removal, CPG-coupled 10mer ATGC-C<sub>6</sub>-NH<sub>2</sub> was reacted with 2-((3-formylnaphthalen-2-yl)oxy)acetic acid according to RP-06.

**HPLC trace of crude reaction mixture 15c (Analytical RP-HPLC, Method-II)**

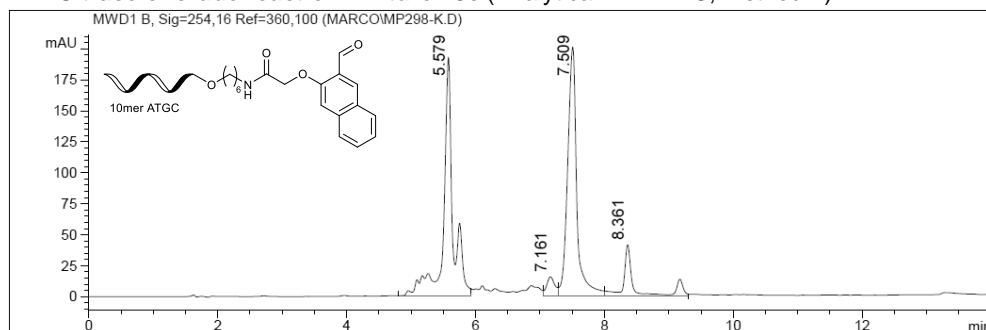

Peak list:

| Ret. Time | Width min | Height  | Area     | Area % |
|-----------|-----------|---------|----------|--------|
| 5.579     | 0.169     | 192.695 | 1958.967 | 43.751 |
| 7.161     | 0.150     | 15.139  | 136.541  | 3.049  |
| 7.509     | 0.163     | 200.876 | 1960.796 | 43.792 |
| 8.361     | 0.171     | 41.176  | 421.236  | 9.408  |

**MALDI-MS spectrum of crude reaction mixture 15c**

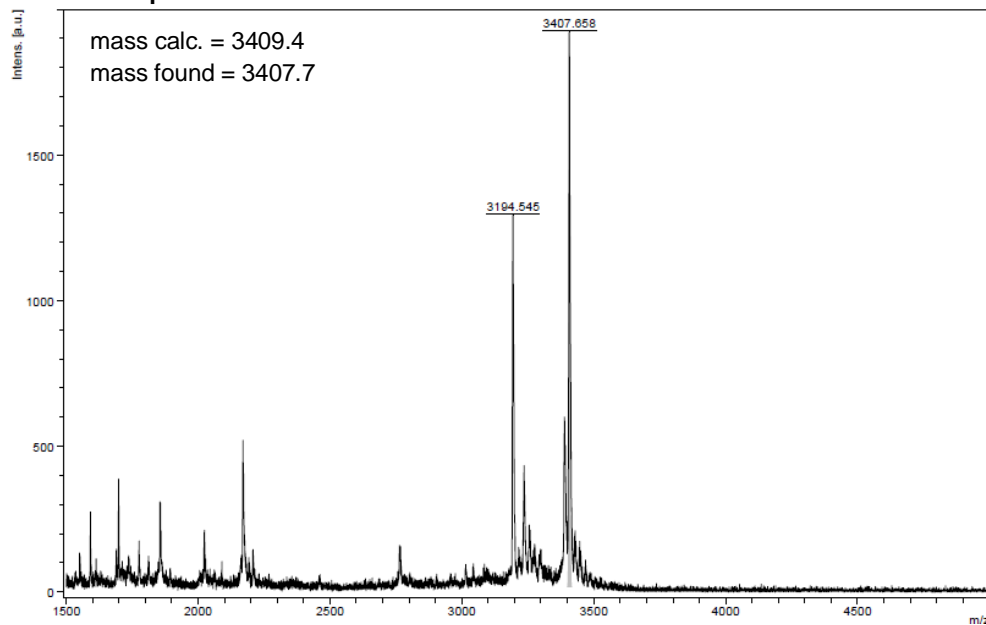

**DNA conjugate 17:** Following DMT removal, CPG-coupled 10mer ATGC-C<sub>6</sub>-NH<sub>2</sub> was reacted with Fmoc-4-aminobenzoic acid according to RP-06.

**HPLC trace of crude reaction mixture 17 (Analytical RP-HPLC, Method-II)**

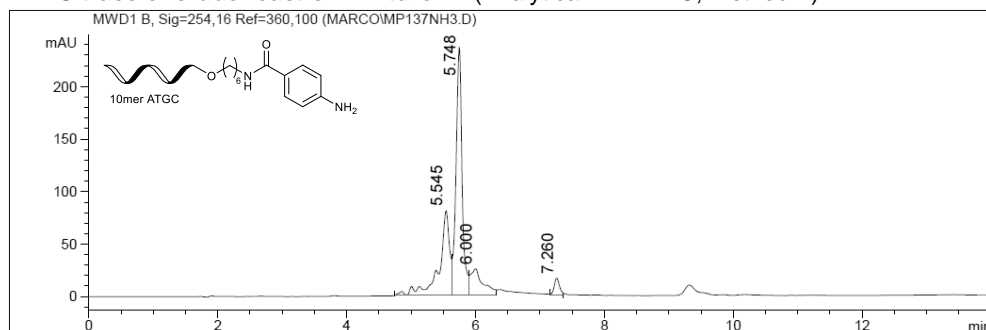

Peak list:

| Ret. Time | Width min | Height  | Area     | Area % |
|-----------|-----------|---------|----------|--------|
| 5.545     | 0.185     | 80.235  | 889.637  | 31.150 |
| 5.748     | 0.108     | 236.329 | 1537.165 | 53.823 |
| 6.000     | 0.227     | 24.931  | 338.957  | 11.868 |
| 7.260     | 0.094     | 15.985  | 90.193   | 3.158  |

**MALDI-MS spectrum of crude reaction mixture 17**

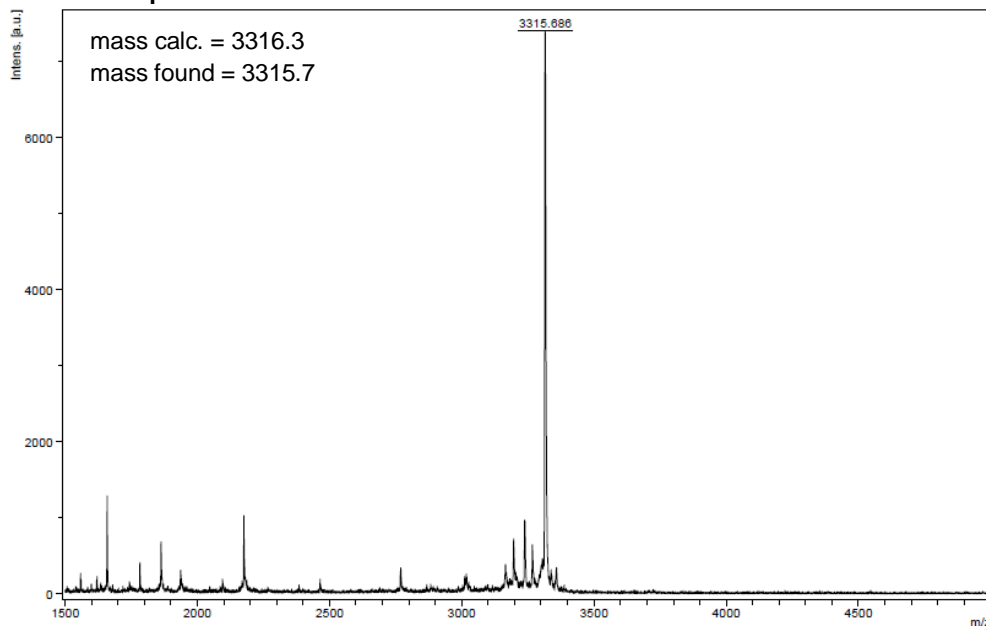

## ZnCl<sub>2</sub>-mediated aza-Diels-Alder reaction on CPG-coupled oligonucleotides

**Table S5** Optimization of ZnCl<sub>2</sub>-mediated aza-Diels-Alder reaction with Danishefsky's diene on CPG-coupled hexT-aldehyde conjugate.<sup>a</sup>

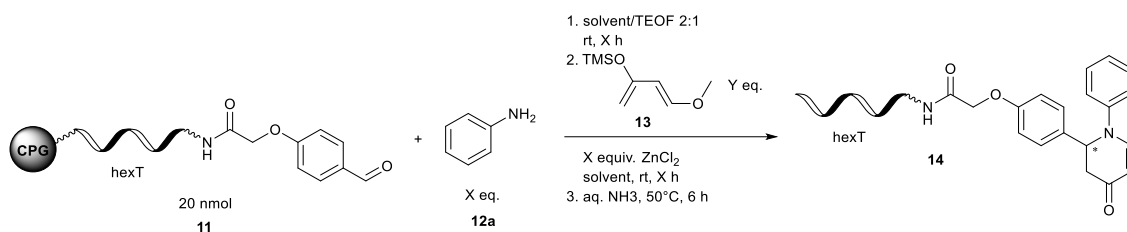

| Entry | Reaction conditions <sup>b</sup>                                                                                                                                                                                          | HPLC trace of crude reaction mixture <sup>c</sup> |
|-------|---------------------------------------------------------------------------------------------------------------------------------------------------------------------------------------------------------------------------|---------------------------------------------------|
| 1     | hexT-aldehyde conjugate <b>11</b>                                                                                                                                                                                         |                                                   |
| 2     | hexT-isoquinolone conjugate <b>14</b>                                                                                                                                                                                     |                                                   |
| 3     | 1. 500 equiv. <b>12a</b><br><b>THF</b> /TEOF (2:1), 4 h, rt<br>2. 500 equiv. <b>13</b><br>50 equiv. ZnCl <sub>2</sub><br><b>THF</b> , 1 h, rt<br><br>=> conversion 62 %                                                   |                                                   |
| 4     | 1. 500 equiv. <b>12a</b><br><b>CH<sub>2</sub>Cl<sub>2</sub></b> /TEOF (2:1), 4 h, rt<br>2. 500 equiv. <b>13</b><br>50 equiv. ZnCl <sub>2</sub><br><b>CH<sub>2</sub>Cl<sub>2</sub></b> , 1 h, rt<br><br>=> conversion 61 % |                                                   |
| 5     | 1. 500 equiv. <b>12a</b><br><b>DCE</b> /TEOF (2:1), 4 h, rt<br>2. 500 equiv. <b>13</b><br>50 equiv. ZnCl <sub>2</sub><br><b>DCE</b> , 1 h, rt<br><br>=> conversion 28 %                                                   |                                                   |

- 6 1. 500 equiv. **12a**  
**ACN**/TEOF (2:1), 4 h, rt  
 2. 500 equiv. **13**  
 50 equiv. ZnCl<sub>2</sub>  
**ACN**, 1 h, rt  
 => conversion 82 %
- 7 1. 500 equiv. **12a**  
**MeOH**/TEOF (2:1), 4 h, rt  
 2. 500 equiv. **13**  
 50 equiv. ZnCl<sub>2</sub>  
**MeOH**, 1 h, rt  
 => conversion 80 %
- 8 1. 500 equiv. **12a**  
**EtOH**/TEOF (2:1), 4 h, rt  
 2. 500 equiv. **13**  
 50 equiv. ZnCl<sub>2</sub>  
**EtOH**, 1 h, rt  
 => conversion 80 %
- 9 1. 500 equiv. **12a**  
**Toluene**/TEOF (2:1), 4 h, rt  
 2. 500 equiv. **13**  
 50 equiv. ZnCl<sub>2</sub>  
**Toluene**, 1 h, rt  
 => conversion 65 %
- 10 1. **1000 equiv. 12a**  
 THF/TEOF (2:1), 4 h, rt  
 2. **1000 equiv. 13**  
 50 equiv. ZnCl<sub>2</sub>  
 THF, 1 h, rt  
 => conversion 49 %
- 11 1. **2000 equiv. 12a**  
 THF/TEOF (2:1), 4 h, rt  
 2. **2000 equiv. 13**  
 50 equiv. ZnCl<sub>2</sub>  
 THF, 1 h, rt  
 => conversion 43 %
- 12 1. **4000 equiv. 12a**  
 THF/TEOF (2:1), 4 h, rt  
 2. **4000 equiv. 13**  
 50 equiv. ZnCl<sub>2</sub>  
 THF, 1 h, rt  
 => conversion 34 %

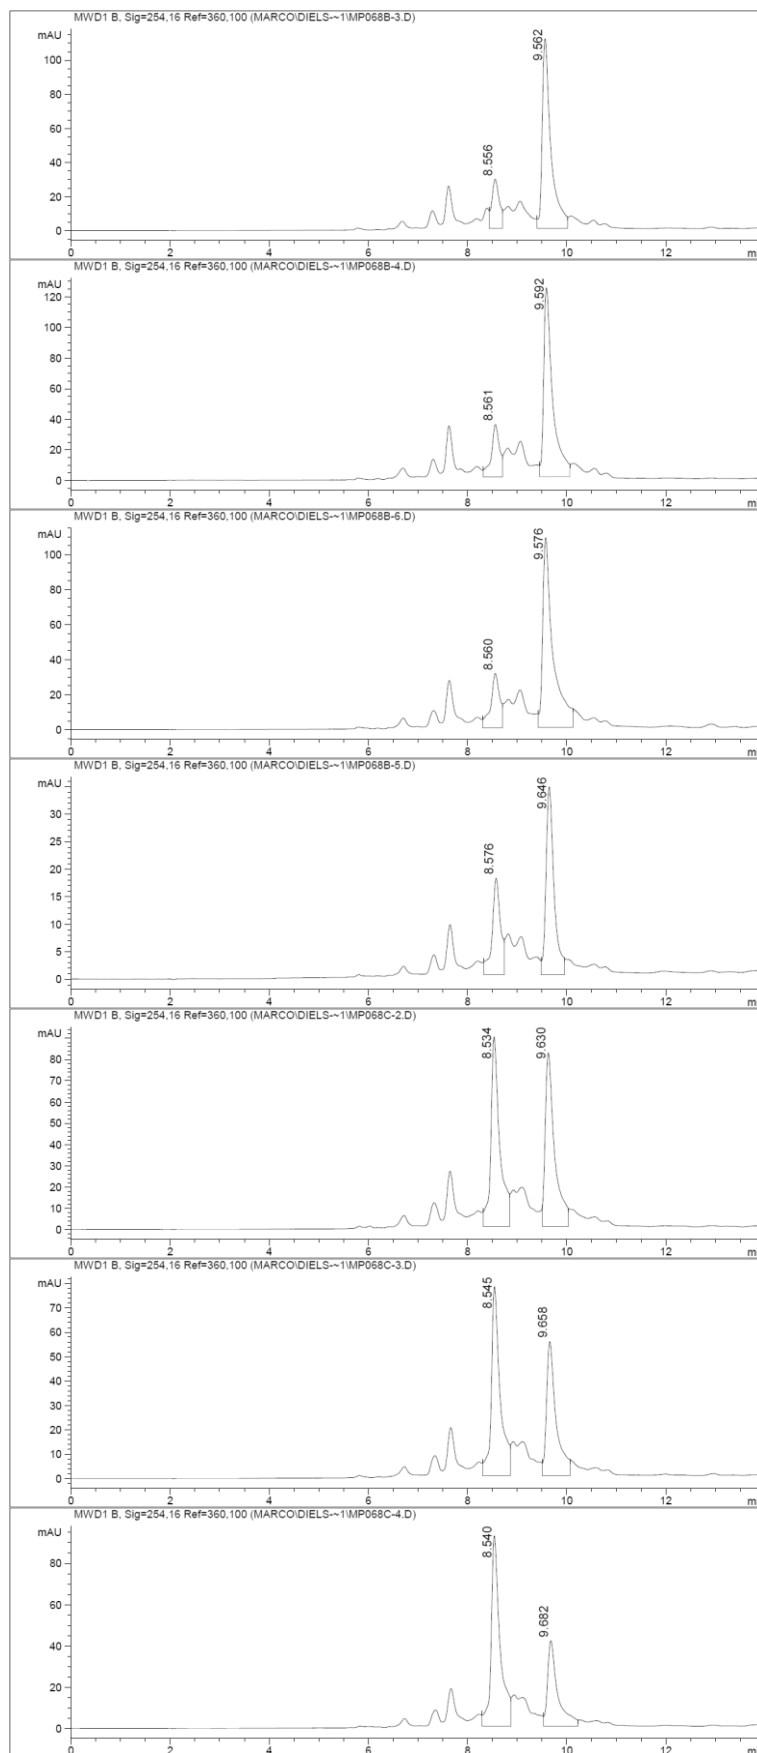



- 13     1. **4000 equiv. 12a**  
          THF/TEOF (2:1), 4 h, rt  
        2. 500 equiv. **13**  
          50 equiv. ZnCl<sub>2</sub>  
          THF, 1 h, rt  
  
        => conversion 33 %

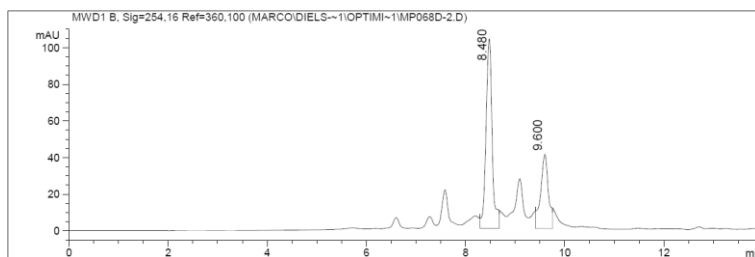

- 14     1. 500 equiv. **12a**  
          THF/TEOF (2:1), 4 h, rt  
        2. **4000 equiv. 13**  
          50 equiv. ZnCl<sub>2</sub>  
          THF, 1 h, rt  
  
        => conversion 73 %

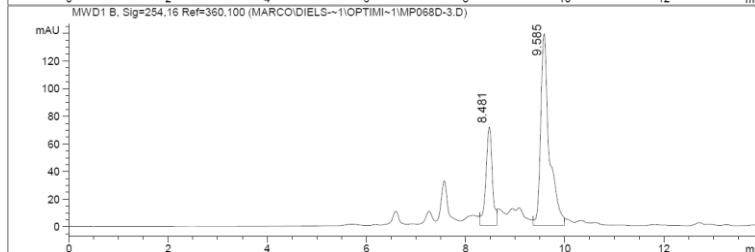

- 15     1. 500 equiv. **12a**  
          THF/TEOF (2:1), 4 h, rt  
        2. 500 equiv. **13**  
          **100 equiv. ZnCl<sub>2</sub>**  
          THF, 1 h, rt  
  
        => conversion 82%

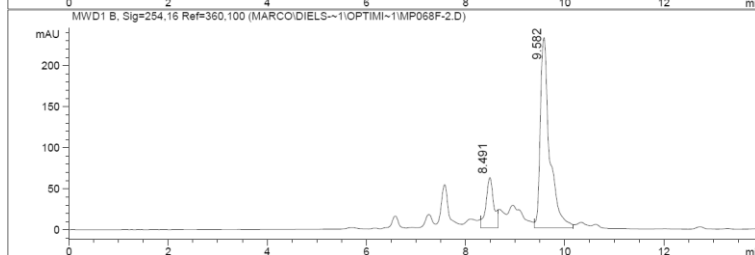

- 16     1. 500 equiv. **12a**  
          THF/TEOF (2:1), 4 h, rt  
        2. 500 equiv. **13**  
          THF, 1 h, rt  
  
        => conversion < 5%

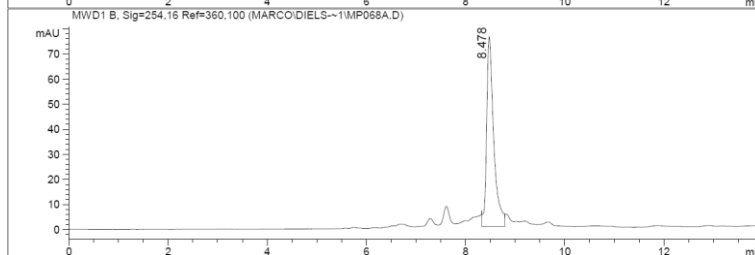

<sup>a</sup> Condensation of CPG-coupled hexT aldehyde conjugate **11** (20 nmol) with aniline **12a** (X equiv.) in 36  $\mu$ L of indicated solvent/triethyl orthoformate (2:1) at ambient temperature for 4 h, then ZnCl<sub>2</sub> (X equiv.) suspended in 30  $\mu$ L of indicated solvent and Danishefsky's diene **13** (X equiv.) were added, the reaction mixture was shaken at ambient temperature for 1 h. <sup>b</sup> Changed parameters are in bold and italic. <sup>c</sup> Analytical RP-HPLC, Method-I. TEOF = triethyl orthoformate.

**Table S6** – Scope of ZnCl<sub>2</sub>-mediated aza-Diels-Alder reaction with Danishefsky's diene on CPG-coupled 10mer ATGC oligonucleotide-aldehyde conjugate using different amines.<sup>a</sup>

Reaction conditions:  
 1. ACN/TEOF 2:1, rt, 4 h  
 2. TMSO, 13  
 100 equiv. ZnCl<sub>2</sub>, ACN, rt, 1 h  
 3. aq. NH<sub>3</sub>, 50°C, 6 h

| Entry | Product    | Amine          | Conversion [%] <sup>b</sup> | Mass <sub>calc.</sub><br>Mass <sub>found</sub> <sup>c</sup> |
|-------|------------|----------------|-----------------------------|-------------------------------------------------------------|
| 1     | <b>16a</b> | <br><b>12a</b> | 80                          | 3502.5<br>3503.0                                            |
| 2     | <b>16b</b> | <br><b>12b</b> | 83                          | 3530.6<br>3530.6                                            |
| 3     | <b>16c</b> | <br><b>12c</b> | 78                          | 3530.6<br>3530.7                                            |
| 4     | <b>16d</b> | <br><b>12d</b> | 21                          | 3530.6<br>3530.5                                            |
| 5     | <b>16e</b> | <br><b>12e</b> | 82                          | 3520.5<br>3522.4                                            |
| 6     | <b>16f</b> | <br><b>12f</b> | 75                          | 3520.5<br>3518.2                                            |
| 7     | <b>16g</b> | <br><b>12g</b> | 63                          | 3538.5<br>3540.5                                            |
| 8     | <b>16h</b> | <br><b>12h</b> | 75                          | 3581.4<br>3582.0                                            |
| 9     | <b>16i</b> | <br><b>12i</b> | < 5                         | 3581.4<br>n.d.                                              |
| 10    | <b>16j</b> | <br><b>12j</b> | 80                          | 3544.6<br>3545.1                                            |
| 11    | <b>16k</b> | <br><b>12k</b> | < 5                         | 3558.6<br>n.d.                                              |
| 12    | <b>16l</b> | <br><b>12l</b> | 71                          | 3562.6<br>3564.0                                            |
| 13    | <b>16m</b> | <br><b>12m</b> | 27                          | 3562.6<br>3563.8                                            |

|                     |     |                                                                                                 |     |                  |
|---------------------|-----|-------------------------------------------------------------------------------------------------|-----|------------------|
| 14                  | 16n | 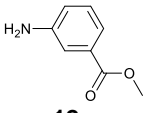<br><b>12n</b> | 64  | 3560.5<br>n.d.   |
| 15                  | 16o | <br><b>12o</b> | 70  | 3526.5<br>3527.2 |
| 16 <sup>d</sup>     | 16p | <br><b>12p</b> | 63  | 3570.6<br>3570.6 |
| 17 <sup>d</sup>     | 16q | <br><b>12q</b> | < 5 | 3503.5<br>n.d.   |
| 18 <sup>e,f,g</sup> | 16r | <br><b>12r</b> | 56  | 3468.5<br>3469.1 |

<sup>a</sup> Condensation of CPG-coupled oligonucleotide conjugate **13** (20 nmol) with amine **14** (500 equiv., 10 μmol) in 36 μL acetonitrile/triethyl orthoformate (2:1) at ambient temperature for 4 h, then addition of ZnCl<sub>2</sub> (100 equiv., 2 μmol) dissolved in 30 μL acetonitrile and Danishefsky's diene **15** (1000 equiv., 20 μmol) at ambient temperature for 1 h. DNA cleavage with 30 % aqueous ammonia at 50 °C for 6 h. <sup>b</sup> Determined by analytical RP-HPLC analysis. <sup>c</sup> Measured by MALDI-MS. <sup>d</sup> Dimethyl sulfoxid was used instead of acetonitrile. <sup>e</sup> 1000 equiv. of amine were used. <sup>d</sup> Yb(OTf)<sub>3</sub> was used instead of ZnCl<sub>2</sub>. <sup>g</sup> 2<sup>nd</sup> step of the reaction was performed overnight at 35 °C. 10mer ATGC = 5'-GTC ATG ATC T-3'. n.d. = not detected.

## Products of aza-Diels-Alder reaction with Danishefsky's diene on CPG-coupled 10mer ATGC oligonucleotide-aldehyde conjugate

**DNA conjugate 14:** CPG-coupled hexT-aldehyde conjugate **11** was reacted with aniline **12a** and Danishefsky's diene **13** according to RP-07.

### HPLC trace of crude reaction mixture **14** (Analytical RP-HPLC, Method-I)

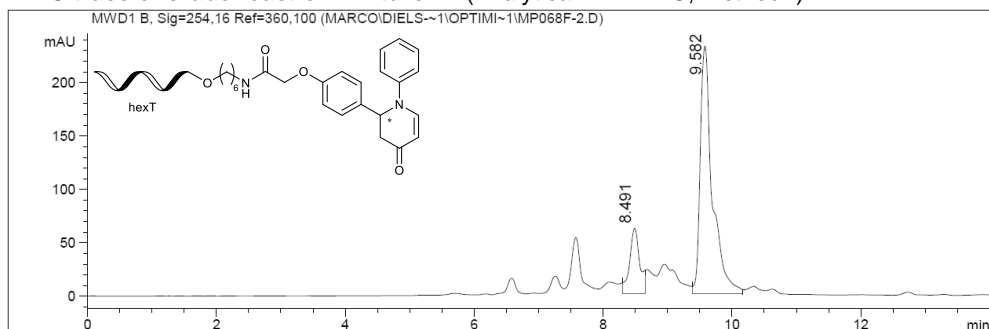

Peak list:

| Ret. Time | Width min | Height  | Area     | Area % |
|-----------|-----------|---------|----------|--------|
| 8.491     | 0.183     | 61.121  | 672.861  | 18.256 |
| 9.582     | 0.217     | 231.477 | 3012.743 | 81.744 |

### HPLC trace of isolated product **14** (Analytical RP-HPLC, Method-I)

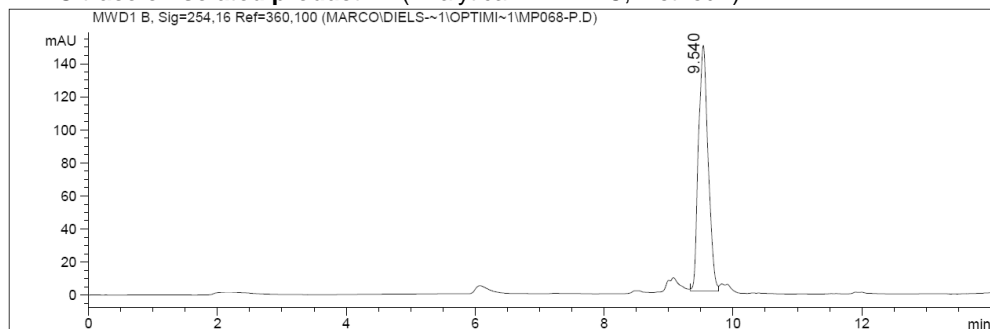

Peak list:

| Ret. Time | Width min | Height  | Area     | Area %  |
|-----------|-----------|---------|----------|---------|
| 9.540     | 0.174     | 148.892 | 1551.445 | 100.000 |

### MALDI-MS spectrum of isolated product **14**

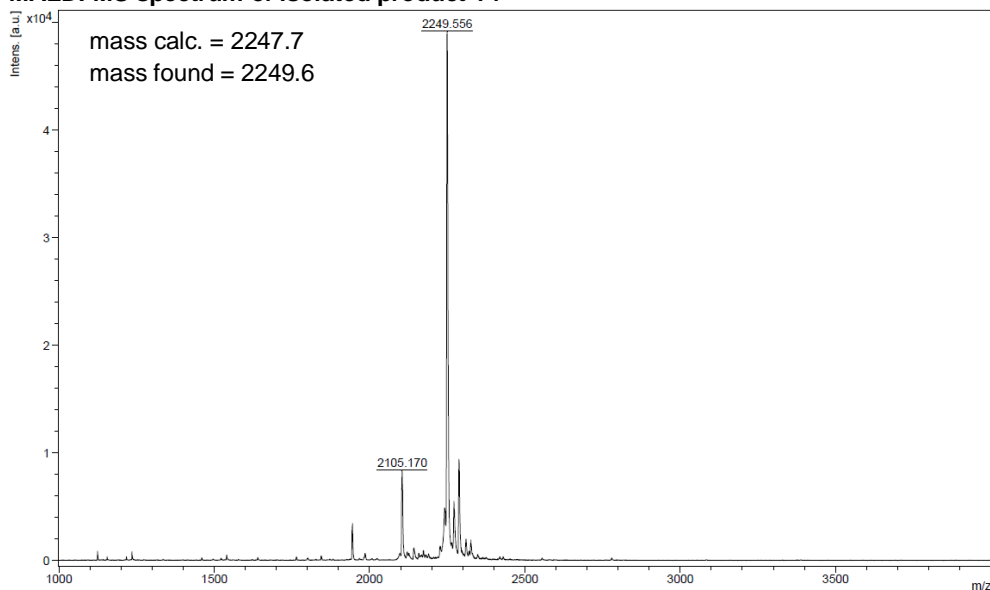

**DNA conjugate 16a:** CPG-coupled 10mer ATGC-aldehyde conjugate **15a** was reacted with aniline **12a** and Danishefsky's diene **13** according to RP-07.

**HPLC trace of crude reaction mixture 16a (Analytical RP-HPLC, Method-II)**

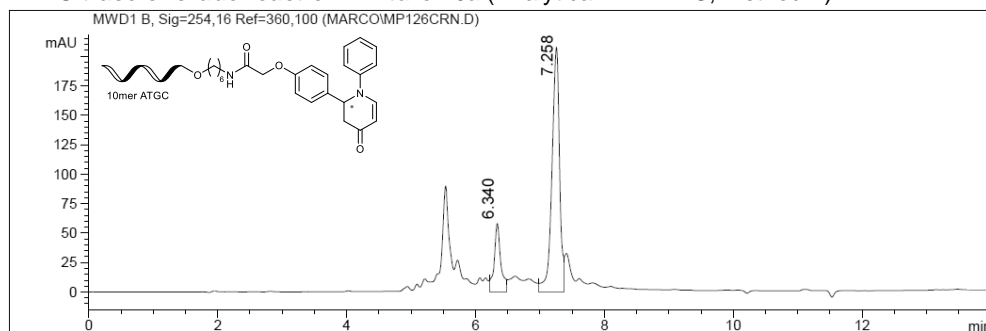

Peak list:

| Ret. Time | Width min | Height  | Area     | Area % |
|-----------|-----------|---------|----------|--------|
| 6.340     | 0.119     | 58.214  | 417.263  | 19.674 |
| 7.258     | 0.136     | 208.242 | 1703.613 | 80.326 |

**HPLC trace of isolated product 16a (Analytical RP-HPLC, Method-II)**

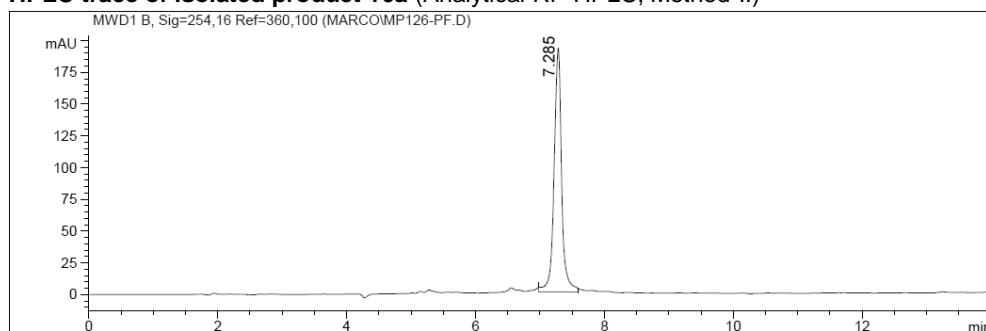

Peak list:

| Ret. Time | Width min | Height  | Area     | Area %  |
|-----------|-----------|---------|----------|---------|
| 7.285     | 0.137     | 192.411 | 1581.263 | 100.000 |

**MALDI-MS spectrum of isolated product 16a**

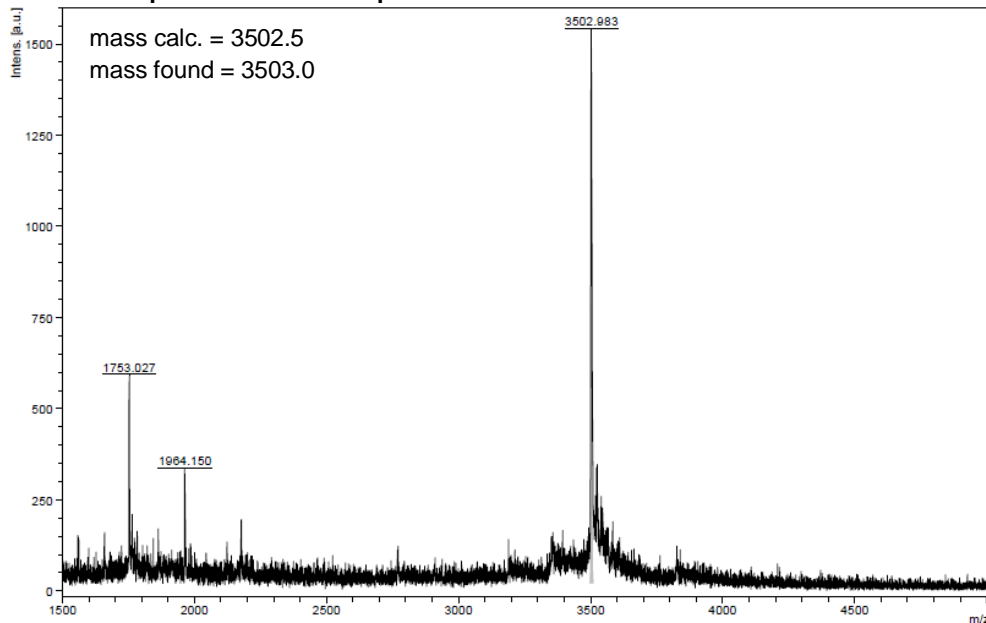

**DNA conjugate 16b:** CPG-coupled 10mer ATGC-aldehyde conjugate **15a** was reacted with 4-ethylaniline **12b** and Danishefsky's diene **13** according to RP-07.

**HPLC trace of crude reaction mixture 16b (Analytical RP-HPLC, Method-II)**

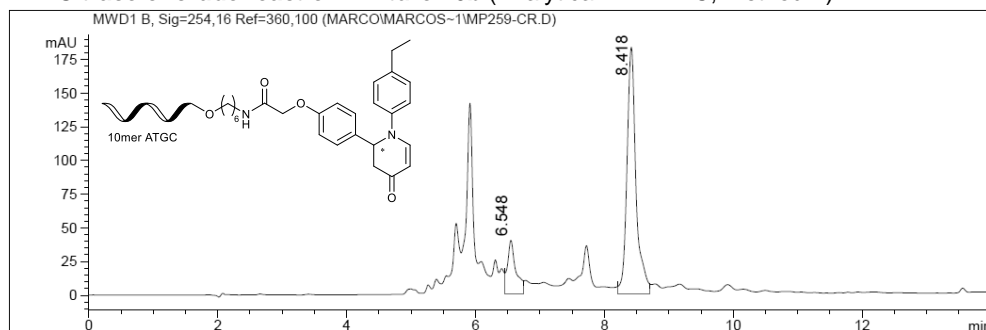

Peak list:

| Ret. Time | Width min | Height  | Area     | Area % |
|-----------|-----------|---------|----------|--------|
| 6.548     | 0.152     | 40.113  | 366.884  | 17.142 |
| 8.418     | 0.161     | 183.156 | 1773.384 | 82.858 |

**HPLC trace of isolated product 16b (Analytical RP-HPLC, Method-II)**

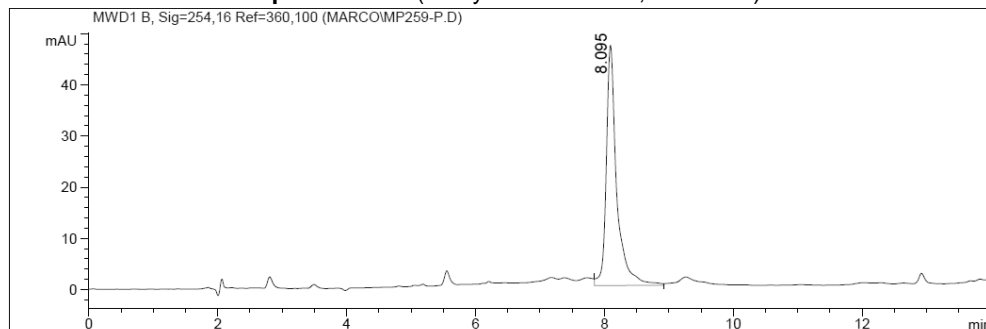

Peak list:

| Ret. Time | Width min | Height | Area    | Area %  |
|-----------|-----------|--------|---------|---------|
| 8.095     | 0.163     | 46.939 | 527.236 | 100.000 |

**MALDI-MS spectrum of isolated product 16b**

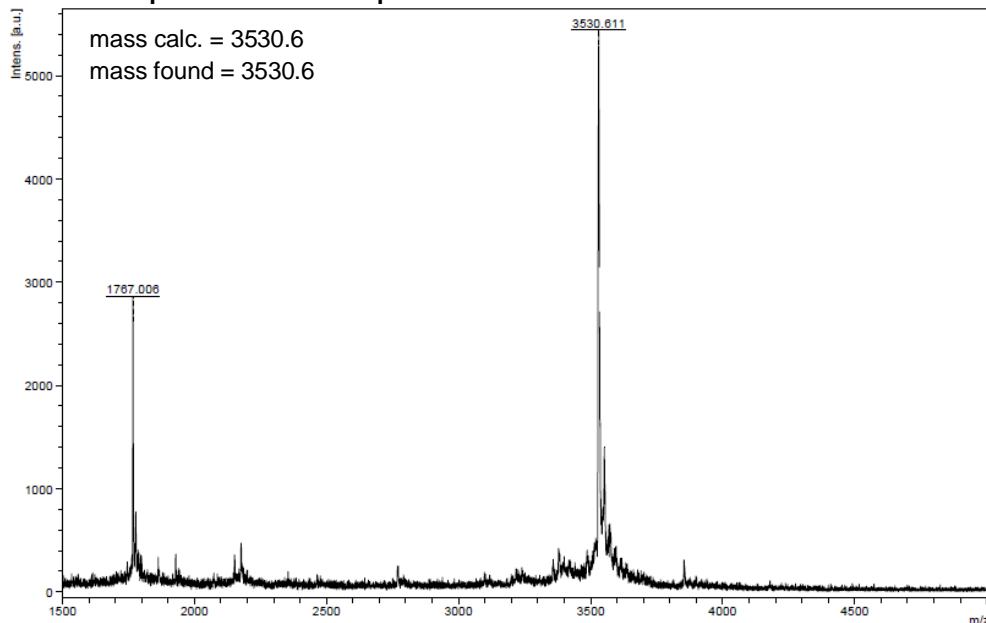

**DNA conjugate 16c:** CPG-coupled 10mer ATGC-aldehyde conjugate **15a** was reacted with 3-ethylaniline **12c** and Danishefsky's diene **13** according to RP-07.

**HPLC trace of crude reaction mixture 16c (Analytical RP-HPLC, Method-II)**

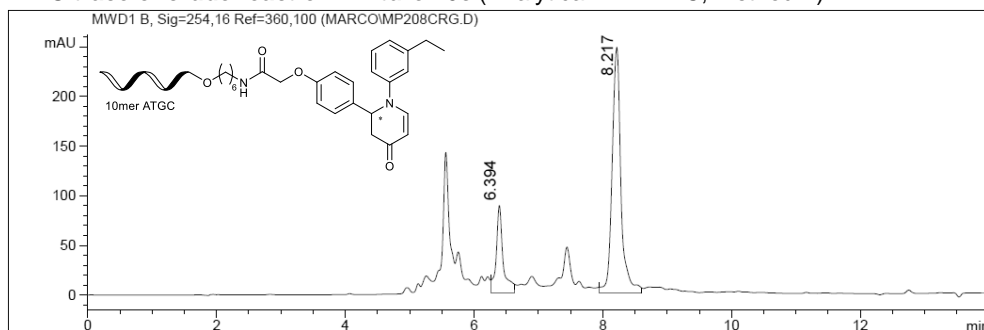

**HPLC trace of isolated product 16c (Analytical RP-HPLC, Method-II)**

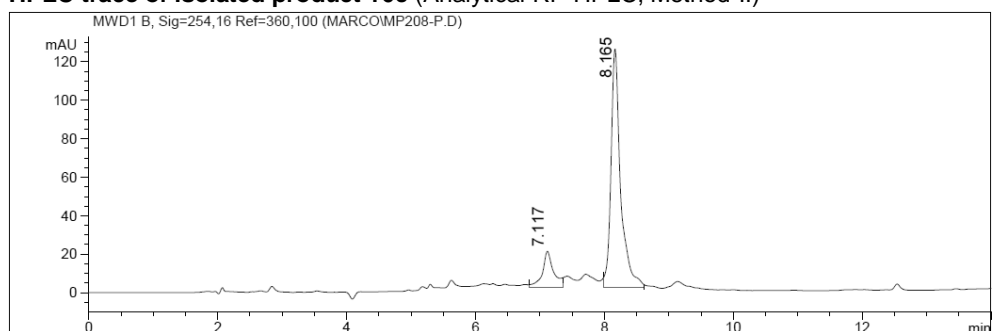

**MALDI-MS spectrum of isolated product 16c**

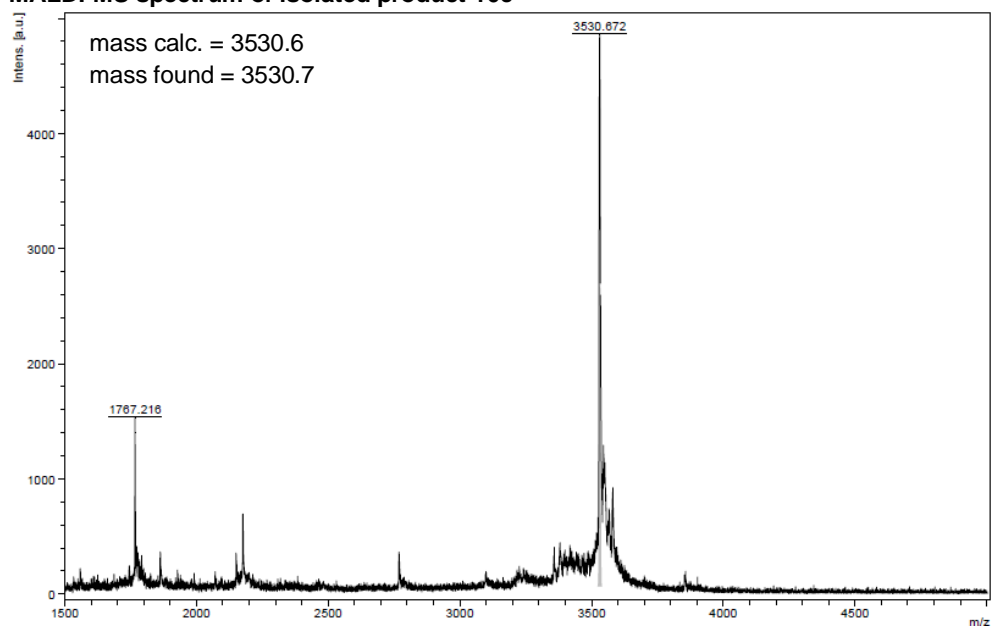

**DNA conjugate 16d:** CPG-coupled 10mer ATGC-aldehyde conjugate **15a** was reacted with 2-ethylaniline **12d** and Danishefsky's diene **13** according to RP-07.

**HPLC trace of crude reaction mixture 16d (Analytical RP-HPLC, Method-II)**

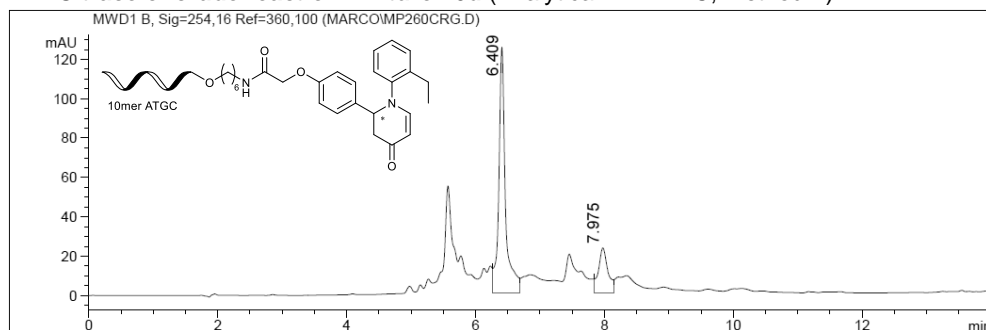

Peak list:

| Ret. Time | Width min | Height  | Area    | Area % |
|-----------|-----------|---------|---------|--------|
| 6.409     | 0.118     | 125.205 | 888.869 | 79.180 |
| 7.975     | 0.170     | 22.931  | 233.718 | 20.820 |

**HPLC trace of isolated product 16d (Analytical RP-HPLC, Method-II)**

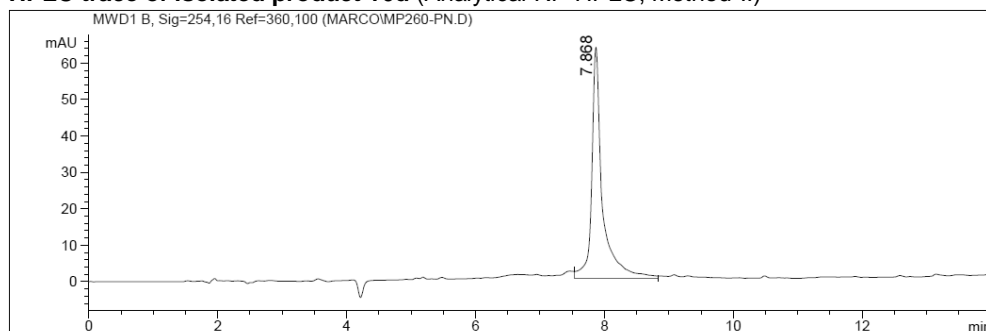

Peak list:

| Ret. Time | Width min | Height | Area    | Area %  |
|-----------|-----------|--------|---------|---------|
| 7.868     | 0.163     | 63.501 | 734.635 | 100.000 |

**MALDI-MS spectrum of isolated product 16d**

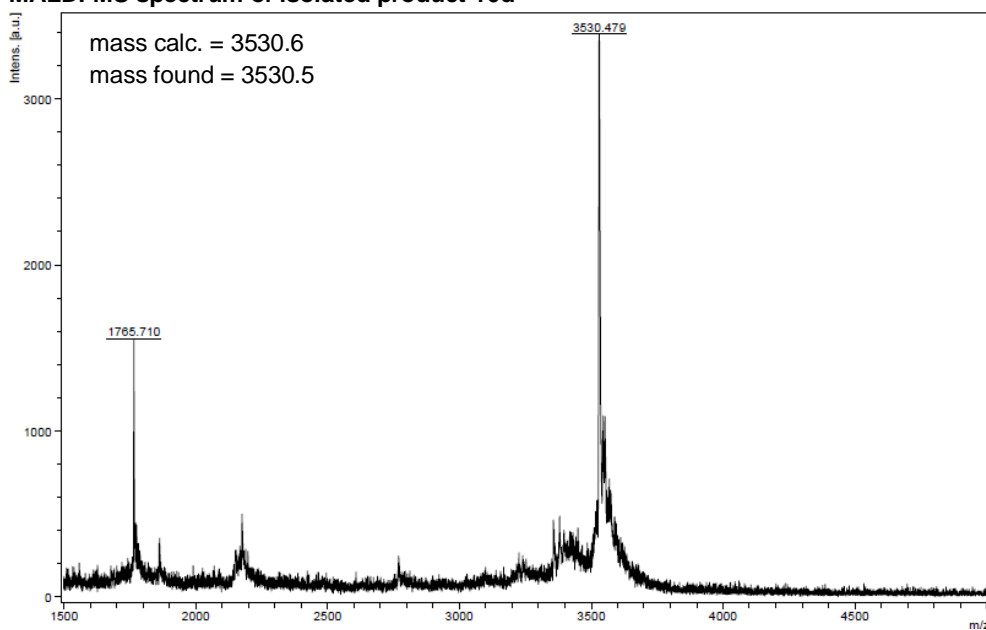



**DNA conjugate 16e:** CPG-coupled 10mer ATGC-aldehyde conjugate **15a** was reacted with 4-fluoroaniline **12e** and Danishefsky's diene **13** according to RP-07.

**HPLC trace of crude reaction mixture 16e (Analytical RP-HPLC, Method-II)**

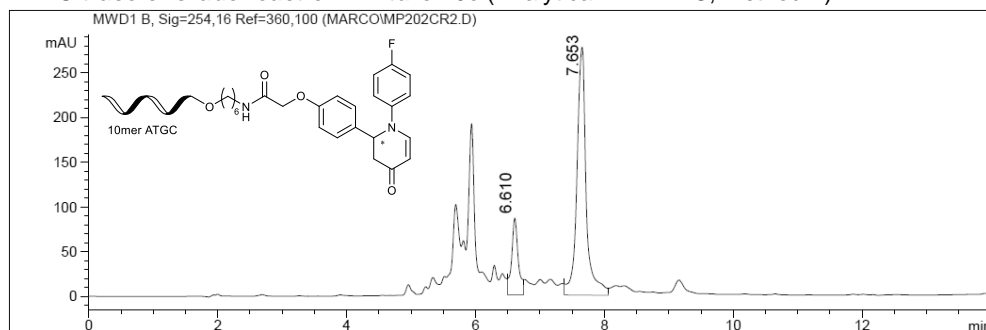

Peak list:

| Ret. Time | Width min | Height  | Area     | Area % |
|-----------|-----------|---------|----------|--------|
| 6.610     | 0.119     | 85.910  | 615.488  | 17.943 |
| 7.653     | 0.169     | 277.660 | 2814.702 | 82.057 |

**HPLC trace of isolated product 16e (Analytical RP-HPLC, Method-II)**

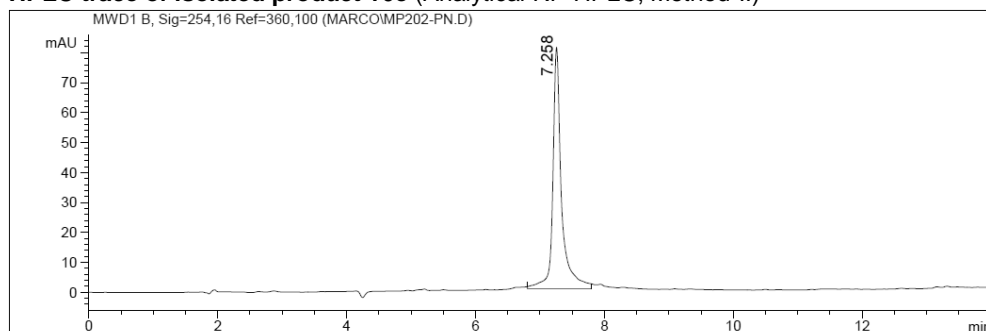

Peak list:

| Ret. Time | Width min | Height | Area    | Area %  |
|-----------|-----------|--------|---------|---------|
| 7.258     | 0.157     | 80.713 | 759.141 | 100.000 |

**MALDI-MS spectrum of isolated product 16e**

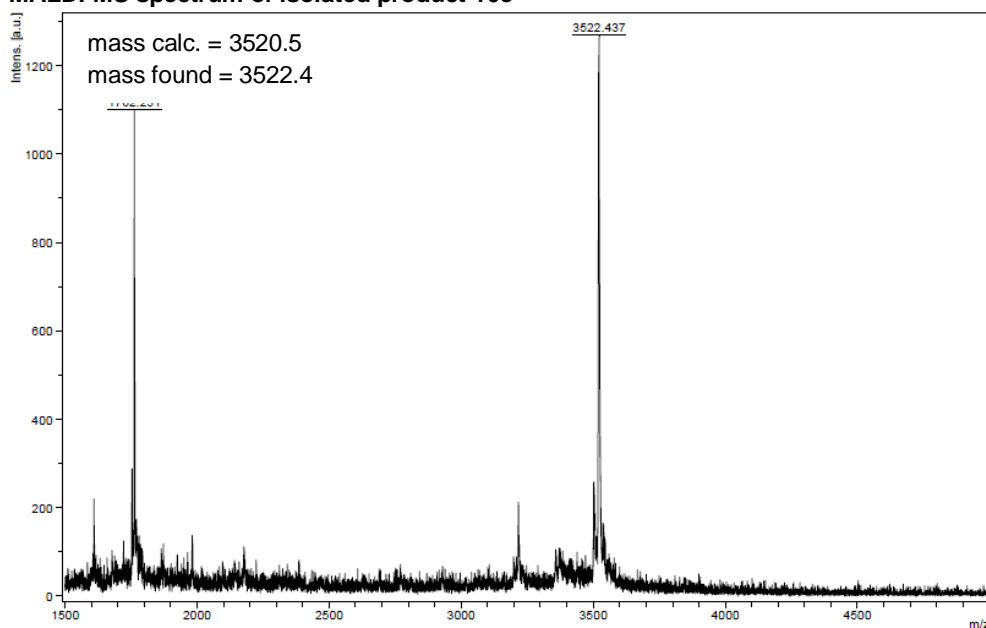

**DNA conjugate 16f:** CPG-coupled 10mer ATGC-aldehyde conjugate **15a** was reacted with 3-fluoroaniline **12f** and Danishefsky's diene **13** according to RP-07.

**HPLC trace of crude reaction mixture 16f (Analytical RP-HPLC, Method-II)**

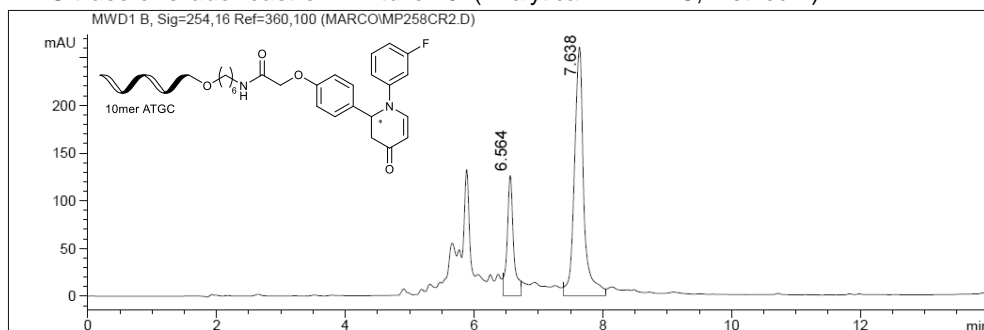

Peak list:

| Ret. Time | Width min | Height  | Area     | Area % |
|-----------|-----------|---------|----------|--------|
| 6.564     | 0.115     | 126.466 | 869.415  | 24.985 |
| 7.638     | 0.167     | 260.806 | 2610.369 | 75.015 |

**HPLC trace of isolated product 16f (Analytical RP-HPLC, Method-II)**

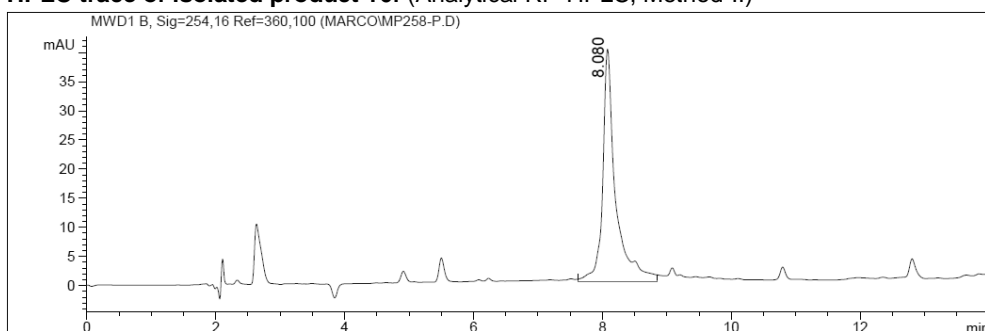

Peak list:

| Ret. Time | Width min | Height | Area    | Area %  |
|-----------|-----------|--------|---------|---------|
| 8.080     | 0.233     | 39.982 | 559.062 | 100.000 |

**MALDI-MS spectrum of isolated product 16f**

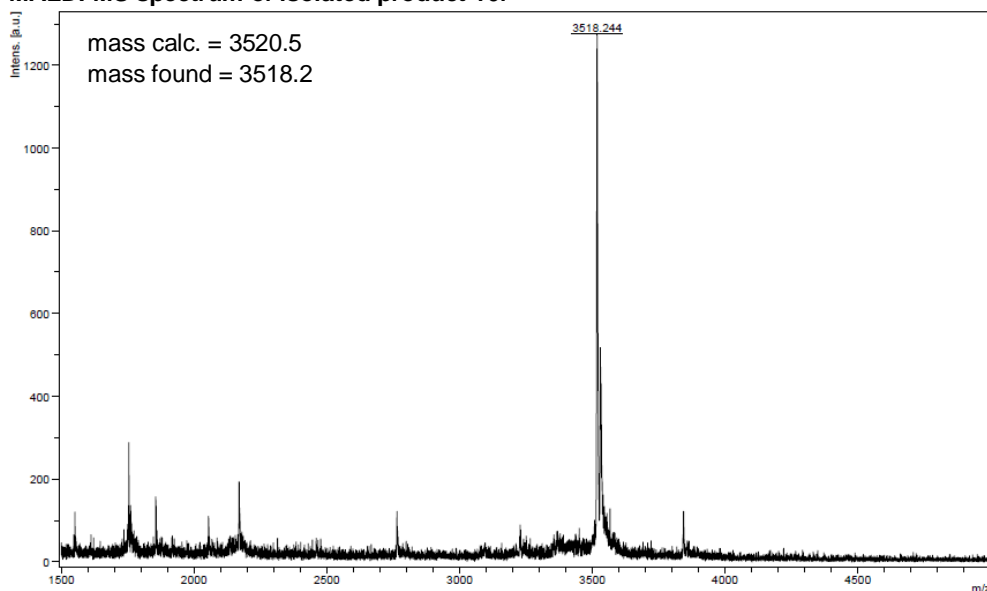

**DNA conjugate 16g:** CPG-coupled 10mer ATGC-aldehyde conjugate **15a** was reacted with 2,4-difluoroaniline **12g** and Danishefsky's diene **13** according to RP-07.

**HPLC trace of crude reaction mixture 16g (Analytical RP-HPLC, Method-II)**

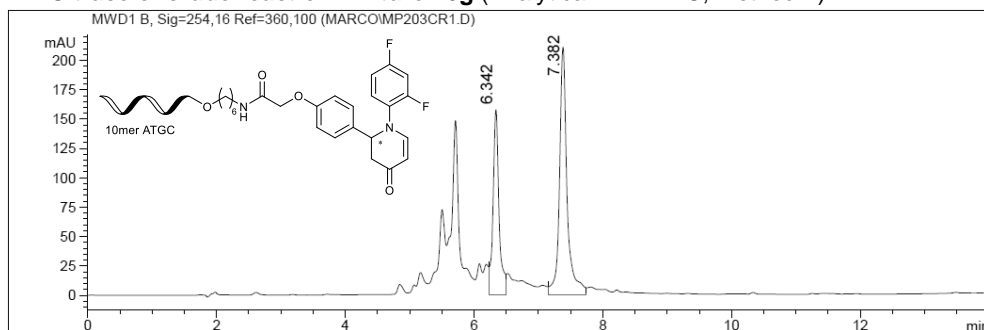

Peak list:

| Ret. Time | Width min | Height  | Area     | Area % |
|-----------|-----------|---------|----------|--------|
| 6.342     | 0.106     | 158.038 | 1001.661 | 36.776 |
| 7.382     | 0.136     | 211.071 | 1722.049 | 63.224 |

**HPLC trace of isolated product 16g (Analytical RP-HPLC, Method-II)**

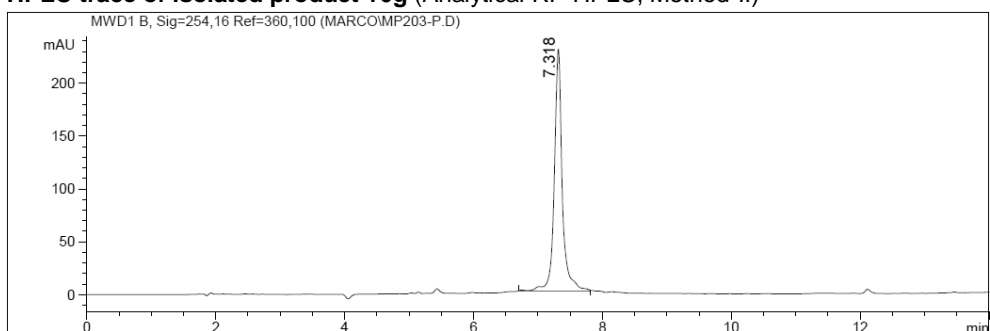

Peak list:

| Ret. Time | Width min | Height  | Area     | Area %  |
|-----------|-----------|---------|----------|---------|
| 7.318     | 0.147     | 229.286 | 2021.325 | 100.000 |

**MALDI-MS spectrum of isolated product 16g**

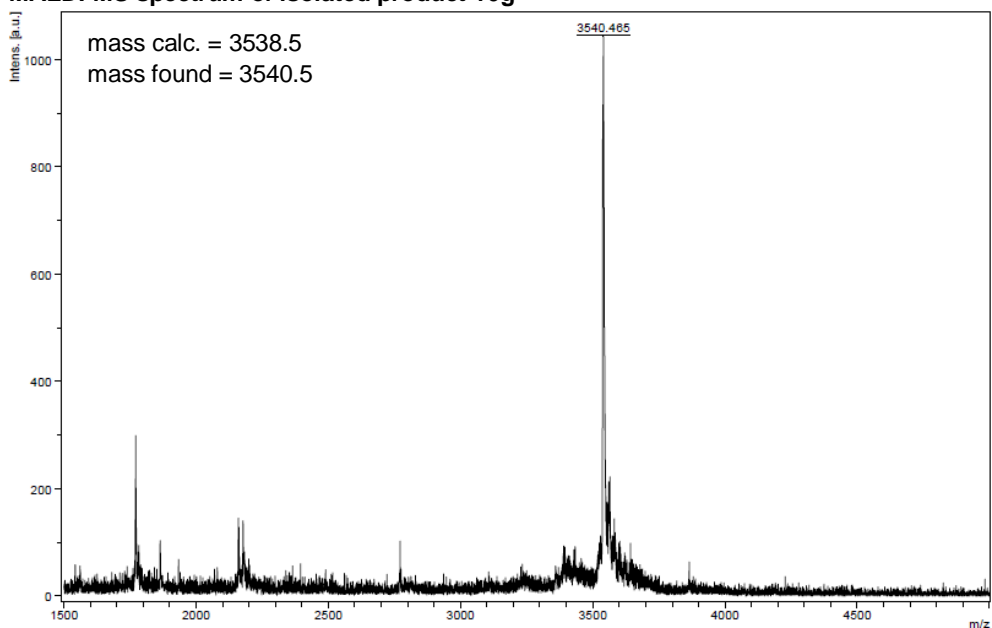

**DNA conjugate 16h:** CPG-coupled 10mer ATGC-aldehyde conjugate **15a** was reacted with 4-bromoaniline **12h** and Danishefsky's diene **13** according to RP-07.

**HPLC trace of crude reaction mixture 16h (Analytical RP-HPLC, Method-II)**

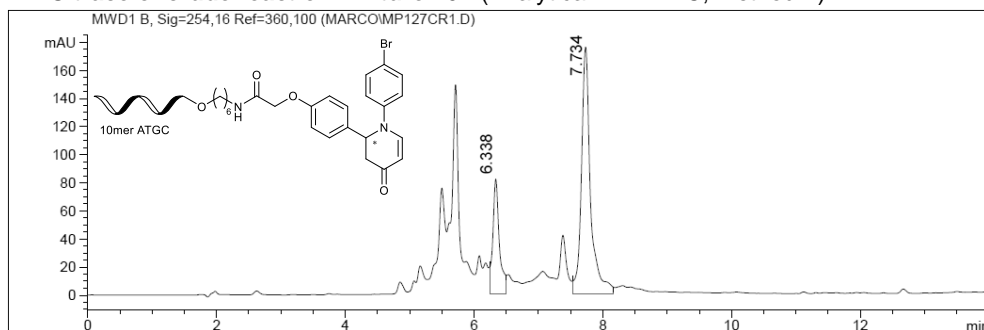

Peak list:

| Ret. Time | Width min | Height  | Area     | Area % |
|-----------|-----------|---------|----------|--------|
| 6.338     | 0.117     | 81.814  | 572.011  | 24.990 |
| 7.734     | 0.163     | 175.931 | 1716.947 | 75.010 |

**HPLC trace of isolated product 16h (Analytical RP-HPLC, Method-II)**

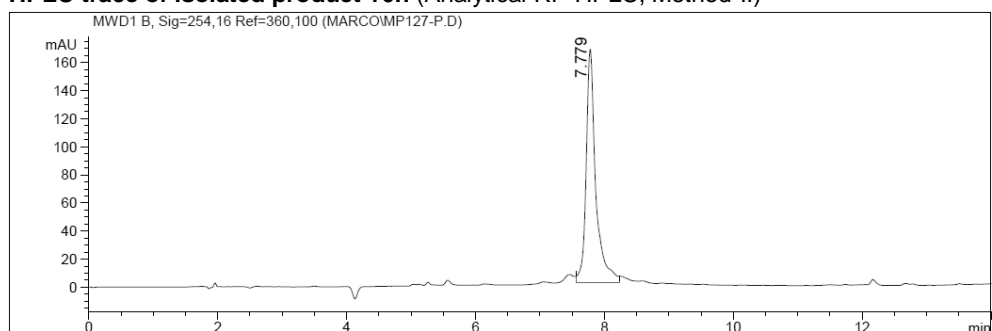

Peak list:

| Ret. Time | Width min | Height  | Area     | Area %  |
|-----------|-----------|---------|----------|---------|
| 7.779     | 0.173     | 166.620 | 1727.824 | 100.000 |

**MALDI-MS spectrum of isolated product 16h**

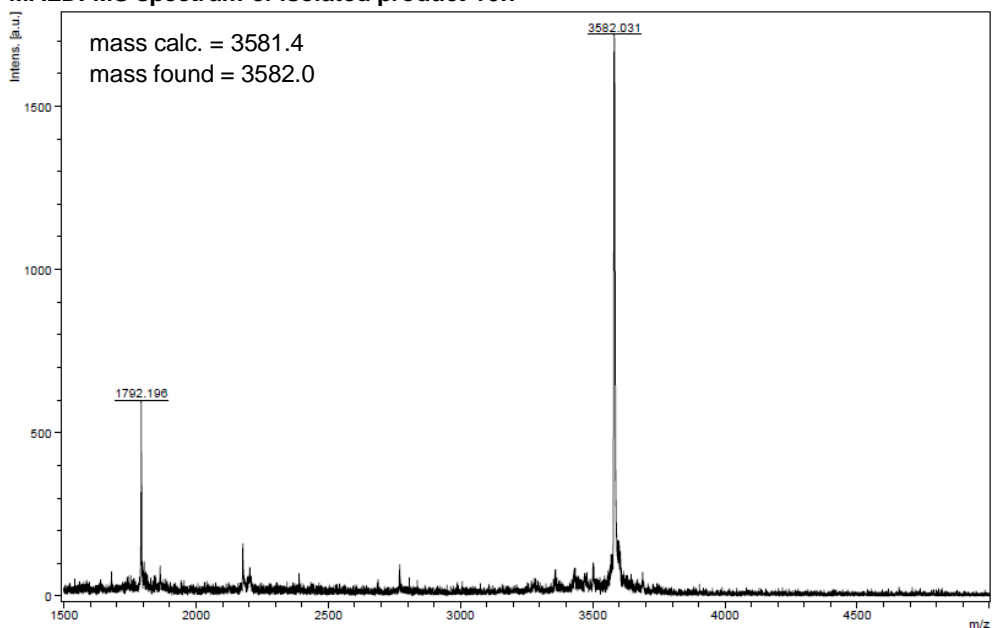

**DNA conjugate 16i:** CPG-coupled 10mer ATGC-aldehyde conjugate **15a** was reacted with 2-bromoaniline **12i** and Danishefsky's diene **13** according to RP-07.

**HPLC trace of crude reaction mixture 16i (Analytical RP-HPLC, Method-II)**

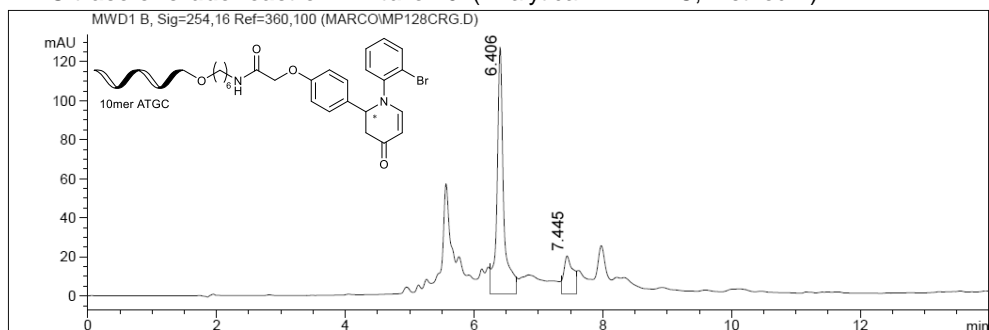

Peak list:

| Ret. Time | Width min | Height  | Area    | Area % |
|-----------|-----------|---------|---------|--------|
| 6.406     | 0.117     | 126.845 | 892.818 | 82.131 |
| 7.445     | 0.165     | 19.606  | 194.252 | 17.869 |

**MALDI-MS spectrum of crude reaction mixture 16i**

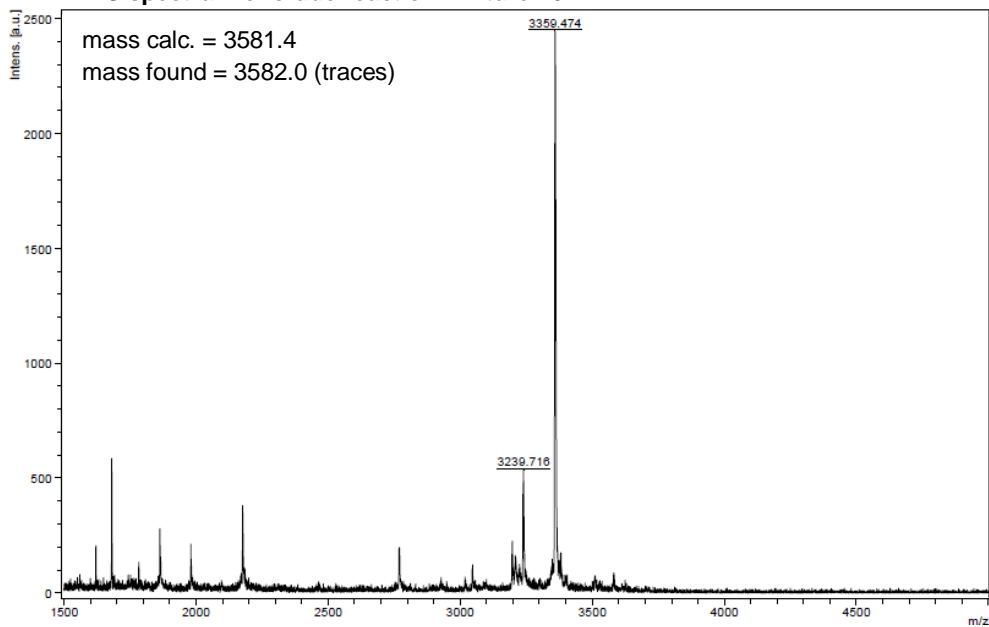

**DNA conjugate 16j:** CPG-coupled 10mer ATGC-aldehyde conjugate **15a** was reacted with 4-isopropylaniline **12j** and Danishefsky's diene **13** according to RP-07.

**HPLC trace of crude reaction mixture 16j (Analytical RP-HPLC, Method-II)**

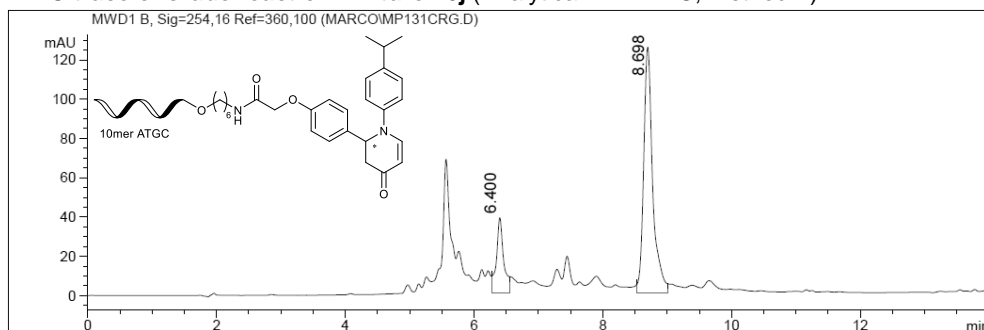

Peak list:

| Ret. Time | Width min | Height  | Area     | Area % |
|-----------|-----------|---------|----------|--------|
| 6.400     | 0.130     | 38.296  | 299.374  | 19.818 |
| 8.698     | 0.161     | 125.035 | 1211.246 | 80.182 |

**HPLC trace of isolated product 16j (Analytical RP-HPLC, Method-II)**

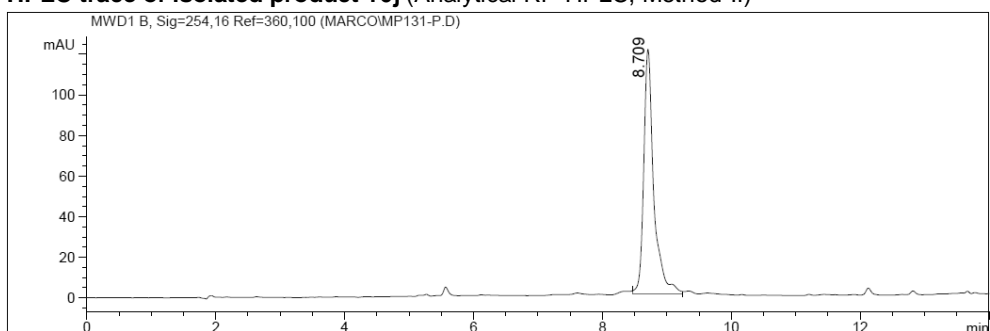

Peak list:

| Ret. Time | Width min | Height  | Area     | Area %  |
|-----------|-----------|---------|----------|---------|
| 8.709     | 0.180     | 120.773 | 1304.196 | 100.000 |

**MALDI-MS spectrum of isolated product 16j**

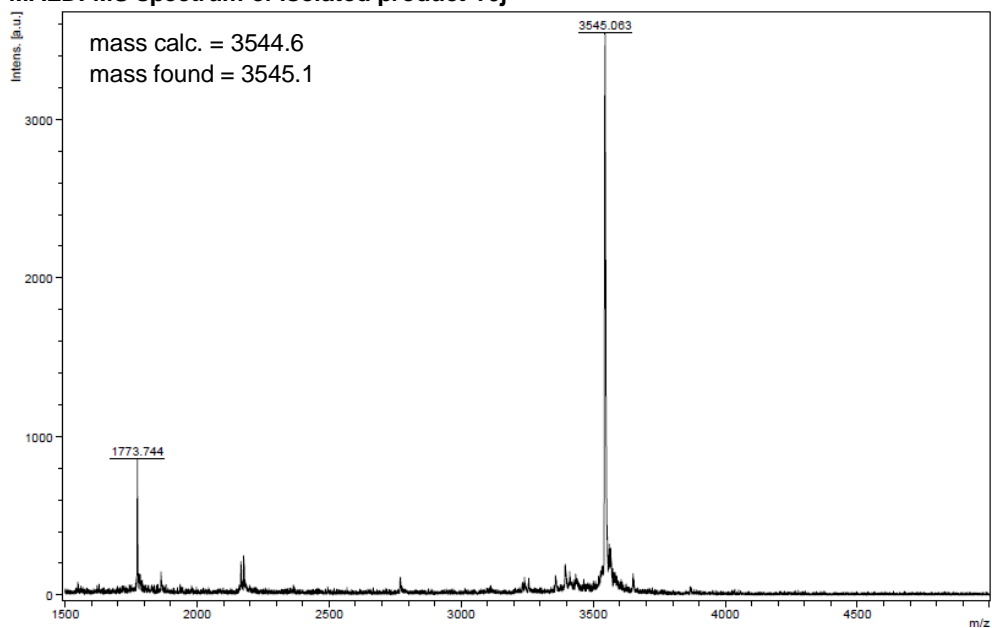

**DNA conjugate 16k:** CPG-coupled 10mer ATGC-aldehyde conjugate **15a** was reacted with 2-*tert*-butylaniline **12k** and Danishefsky's diene **13** according to RP-07.

**HPLC trace of crude reaction mixture 16k (Analytical RP-HPLC, Method-II)**

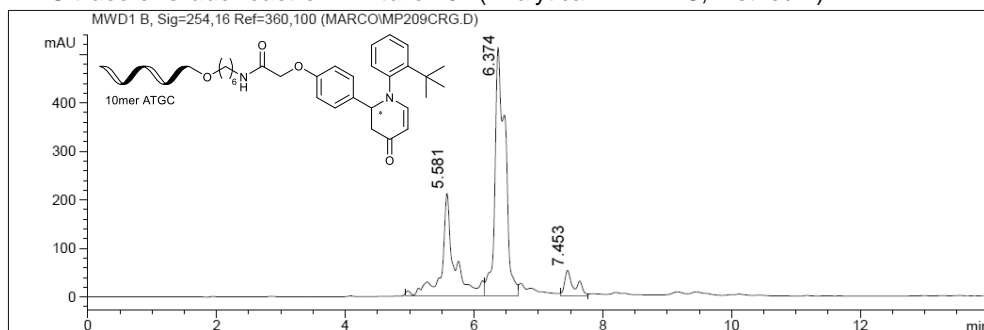

Peak list:

| Ret. Time | Width min | Height  | Area     | Area % |
|-----------|-----------|---------|----------|--------|
| 5.581     | 0.228     | 211.424 | 2894.779 | 31.714 |
| 6.374     | 0.184     | 513.326 | 5666.833 | 62.083 |
| 7.453     | 0.180     | 52.493  | 566.200  | 6.203  |

**MALDI-MS spectrum of crude reaction mixture 16k**

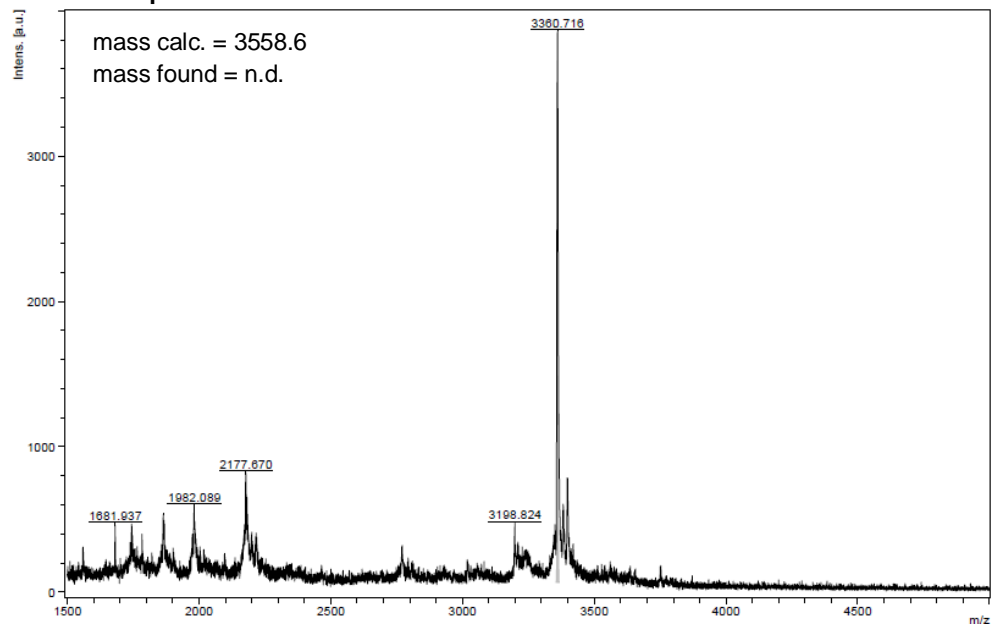

**DNA conjugate 16l:** CPG-coupled 10mer ATGC-aldehyde conjugate **15a** was reacted with 3,4-dimethoxyaniline **12l** and Danishefsky's diene **13** according to RP-07.

**HPLC trace of crude reaction mixture 16l (Analytical RP-HPLC, Method-II)**

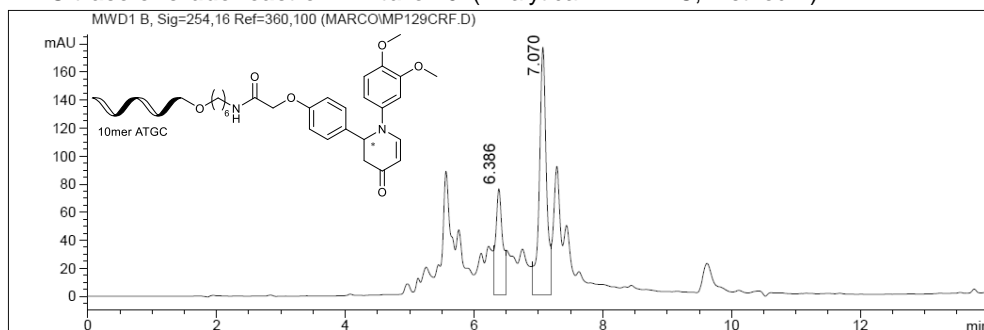

Peak list:

| Ret. Time | Width min | Height  | Area     | Area % |
|-----------|-----------|---------|----------|--------|
| 6.386     | 0.122     | 75.789  | 554.931  | 29.066 |
| 7.070     | 0.128     | 176.746 | 1354.286 | 70.934 |

**HPLC trace of isolated product 16l (Analytical RP-HPLC, Method-II)**

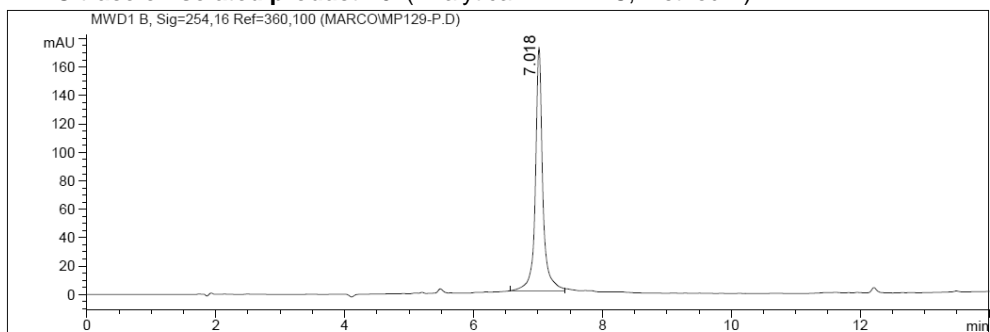

Peak list:

| Ret. Time | Width min | Height  | Area     | Area %  |
|-----------|-----------|---------|----------|---------|
| 7.018     | 0.134     | 171.713 | 1376.149 | 100.000 |

**MALDI-MS spectrum of isolated product 16l**

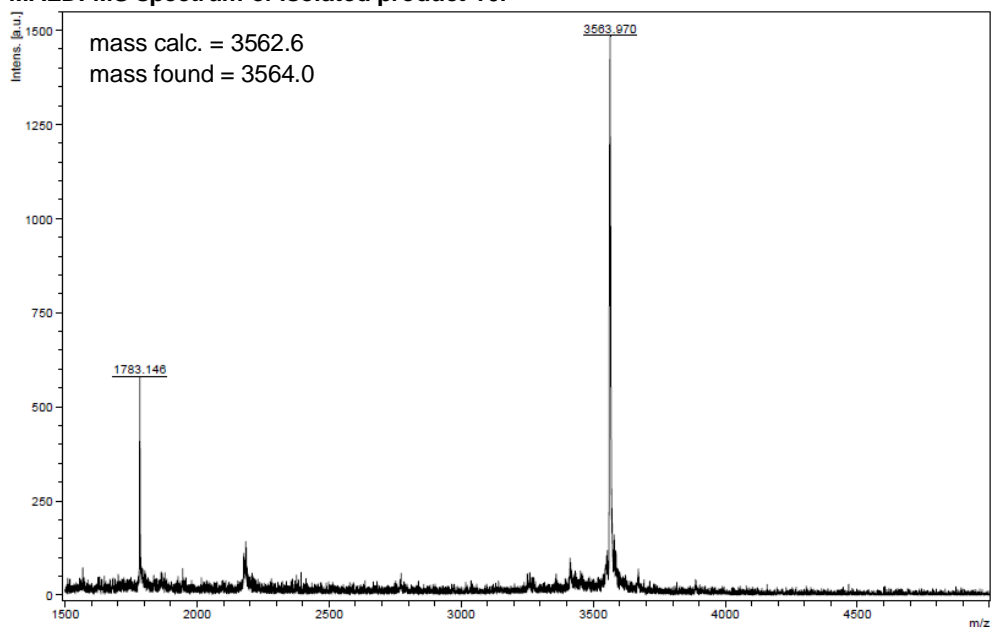



**DNA conjugate 16m:** CPG-coupled 10mer ATGC-aldehyde conjugate **15a** was reacted with 2,3-dimethoxyaniline **12m** and Danishefsky's diene **13** according to RP-07.

**HPLC trace of crude reaction mixture 16m (Analytical RP-HPLC, Method-II)**

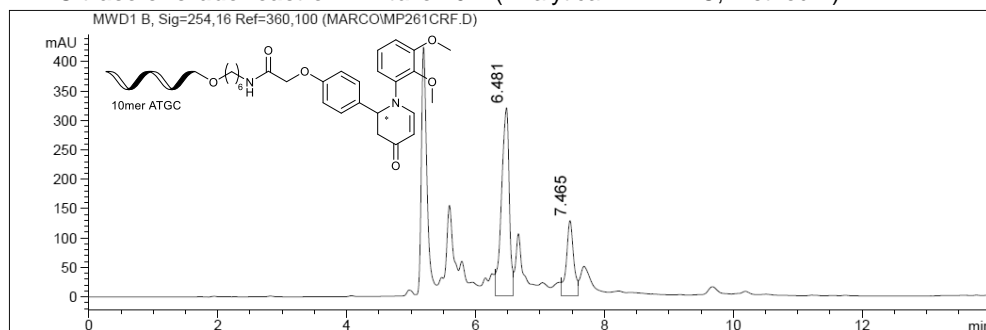

Peak list:

| Ret. Time | Width min | Height  | Area     | Area % |
|-----------|-----------|---------|----------|--------|
| 6.481     | 0.139     | 320.999 | 2678.918 | 72.586 |
| 7.465     | 0.131     | 128.412 | 1011.742 | 27.414 |

**HPLC trace of isolated product 16m (Analytical RP-HPLC, Method-II)**

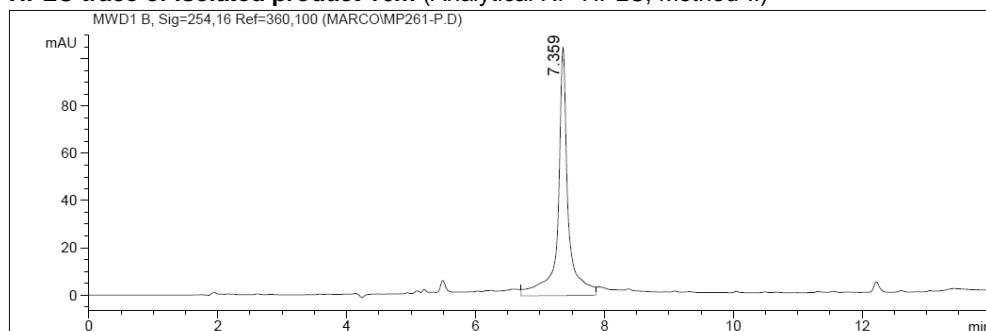

Peak list:

| Ret. Time | Width min | Height  | Area     | Area %  |
|-----------|-----------|---------|----------|---------|
| 7.359     | 0.151     | 104.883 | 1138.079 | 100.000 |

**MALDI-MS spectrum of isolated product 16m**

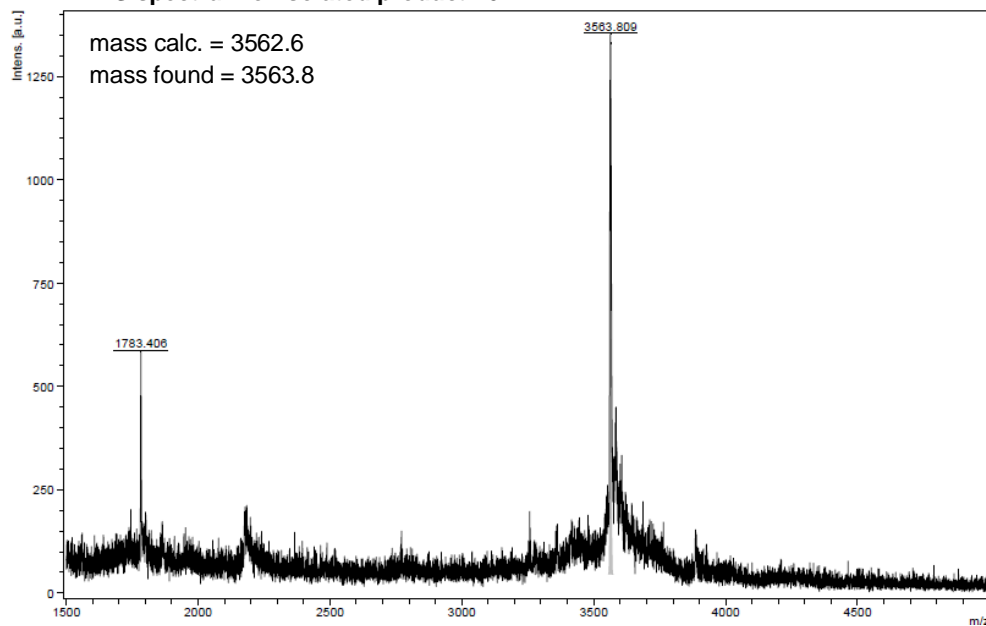

**DNA conjugate 16n:** CPG-coupled 10mer ATGC-aldehyde conjugate **15a** was reacted with methyl 3-aminobenzoate **12n** and Danishefsky's diene **13** according to RP-07.

**HPLC trace of crude reaction mixture 16n (Analytical RP-HPLC, Method-II)**

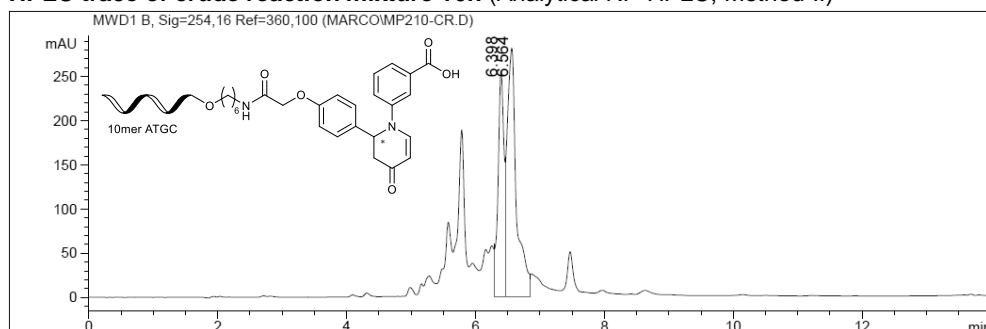

Peak list:

| Ret. Time | Width min | Height  | Area     | Area % |
|-----------|-----------|---------|----------|--------|
| 6.398     | 0.104     | 255.696 | 1598.996 | 36.137 |
| 6.564     | 0.167     | 281.222 | 2825.759 | 63.863 |

**HPLC trace of isolated product 16n (Analytical RP-HPLC, Method-II)**

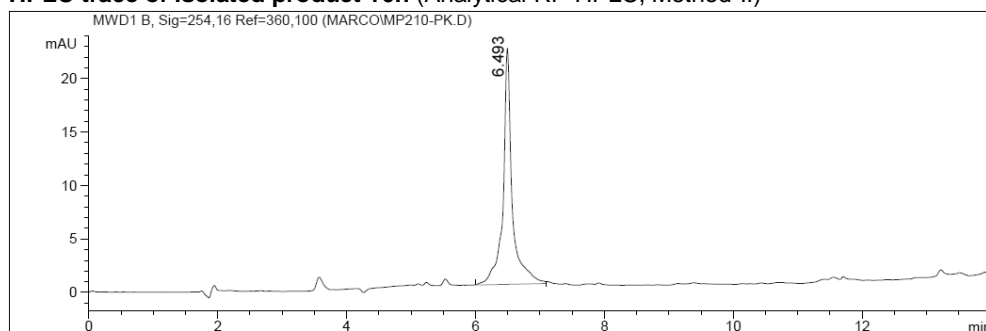

Peak list:

| Ret. Time | Width min | Height | Area    | Area %  |
|-----------|-----------|--------|---------|---------|
| 6.493     | 0.137     | 22.085 | 217.159 | 100.000 |

**MALDI-MS spectrum of isolated product 16n**

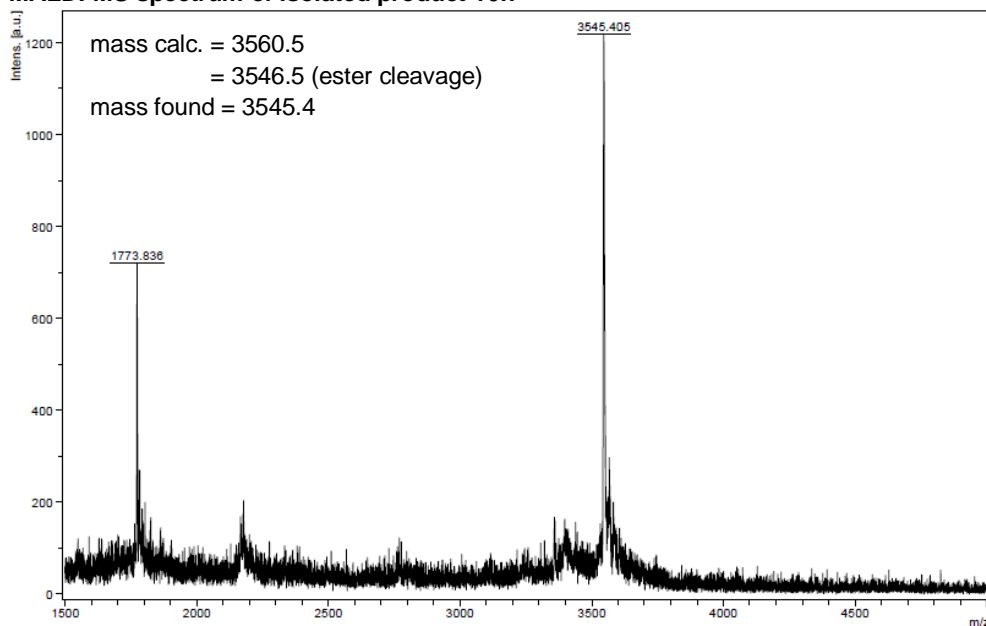

**DNA conjugate 16o:** CPG-coupled 10mer ATGC-aldehyde conjugate **15a** was reacted with 3-ethynylaniline **12o** and Danishefsky's diene **13** according to RP-07.

**HPLC trace of crude reaction mixture 16o (Analytical RP-HPLC, Method-II)**

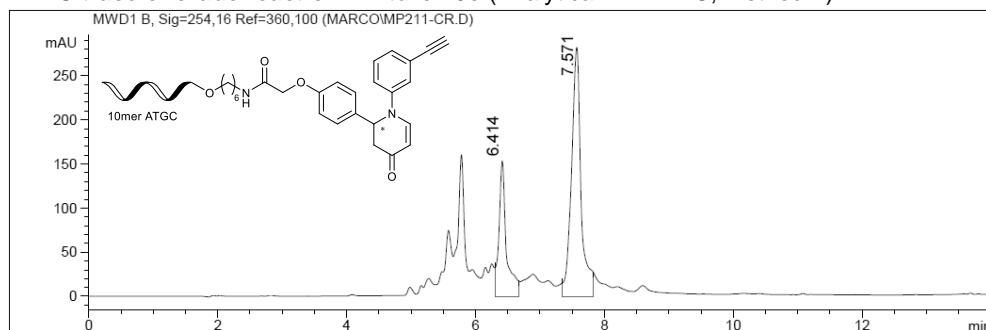

Peak list:

| Ret. Time | Width min | Height  | Area     | Area % |
|-----------|-----------|---------|----------|--------|
| 6.414     | 0.137     | 154.339 | 1266.593 | 30.344 |
| 7.571     | 0.171     | 283.191 | 2907.571 | 69.656 |

**HPLC trace of isolated product 16o (Analytical RP-HPLC, Method-II)**

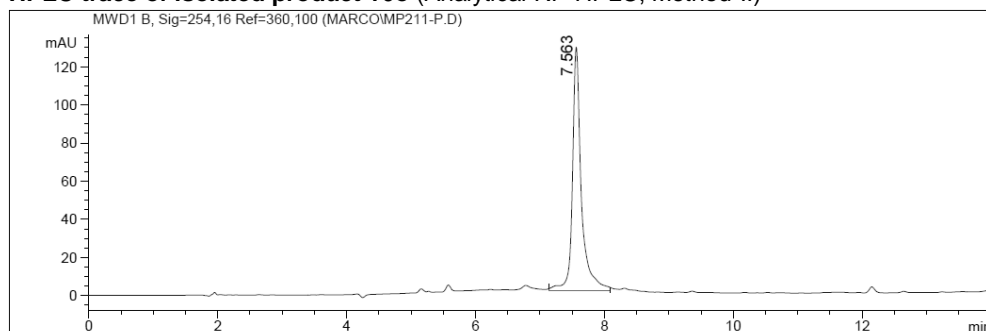

Peak list:

| Ret. Time | Width min | Height  | Area     | Area %  |
|-----------|-----------|---------|----------|---------|
| 7.563     | 0.160     | 127.921 | 1229.832 | 100.000 |

**MALDI-MS spectrum of isolated product 16o**

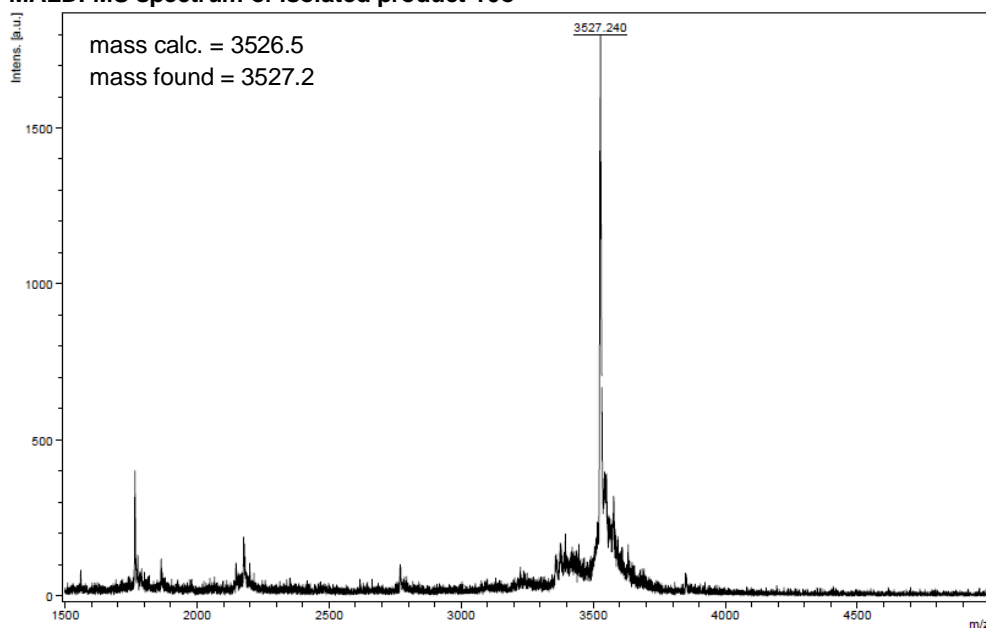

**DNA conjugate 16p:** CPG-coupled 10mer ATGC-aldehyde conjugate **15a** was reacted with 3-(2H-tetrazol-5-yl)aniline **12p** and Danishefsky's diene **13** according to RP-07 (Dimethyl sulfoxide was used instead of acetonitrile).

**HPLC trace of crude reaction mixture 16p (Analytical RP-HPLC, Method-II)**

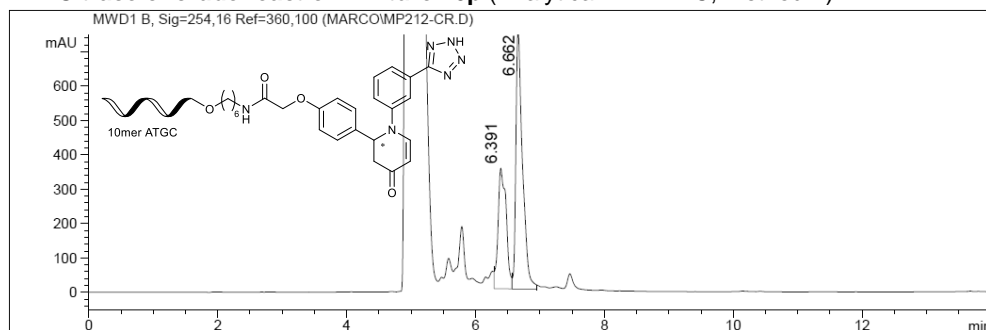

Peak list:

| Ret. Time | Width min | Height  | Area     | Area % |
|-----------|-----------|---------|----------|--------|
| 6.391     | 0.147     | 351.703 | 3094.281 | 36.587 |
| 6.662     | 0.118     | 755.913 | 5362.938 | 63.413 |

**HPLC trace of isolated product 16p (Analytical RP-HPLC, Method-II)**

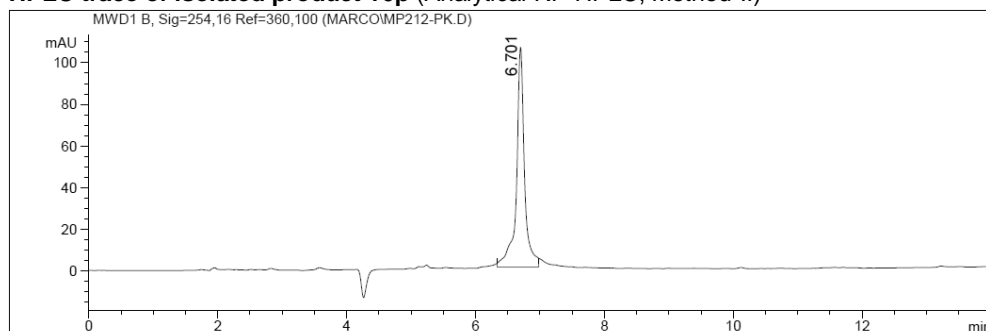

Peak list:

| Ret. Time | Width min | Height  | Area    | Area %  |
|-----------|-----------|---------|---------|---------|
| 6.701     | 0.147     | 105.983 | 932.071 | 100.000 |

**MALDI-MS spectrum of isolated product 16p**

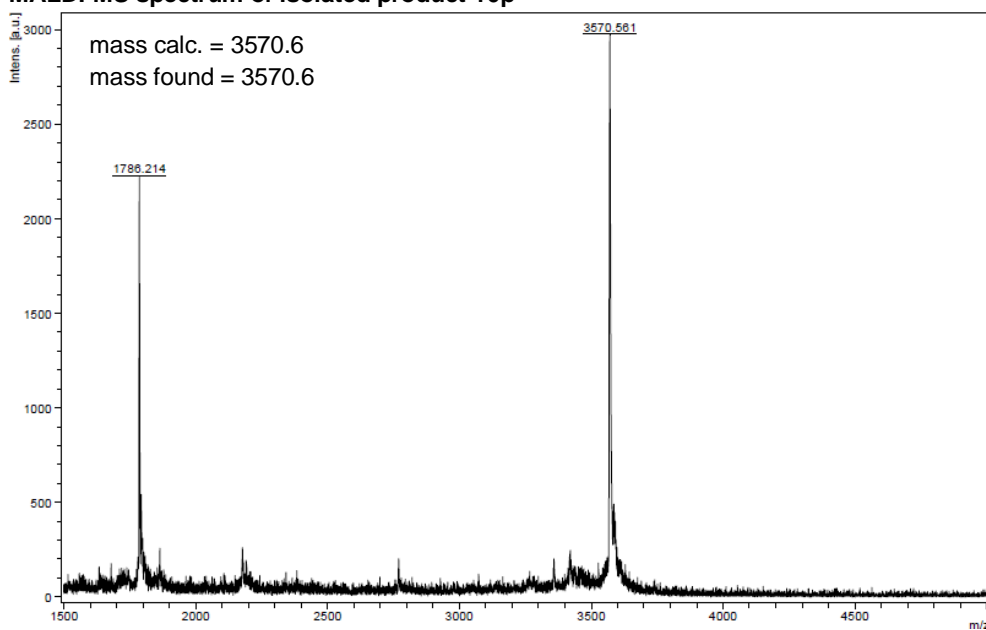

**DNA conjugate 16q:** CPG-coupled 10mer ATGC-aldehyde conjugate **15a** was reacted with pyridin-4-amine **12q** and Danishefsky's diene **13** according to RP-07 (Dimethyl sulfoxide was used instead of acetonitrile).

**HPLC trace of crude reaction mixture 16q (Analytical RP-HPLC, Method-II)**

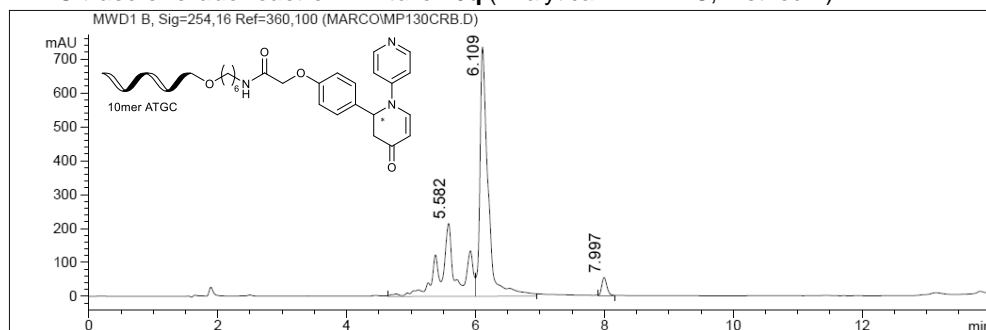

Peak list:

| Ret. Time | Width min | Height  | Area     | Area % |
|-----------|-----------|---------|----------|--------|
| 5.582     | 0.307     | 215.698 | 3966.932 | 37.123 |
| 6.109     | 0.145     | 737.833 | 6401.872 | 59.910 |
| 7.997     | 0.096     | 54.891  | 317.055  | 2.967  |

**MALDI-MS spectrum of crude reaction mixture 16q**

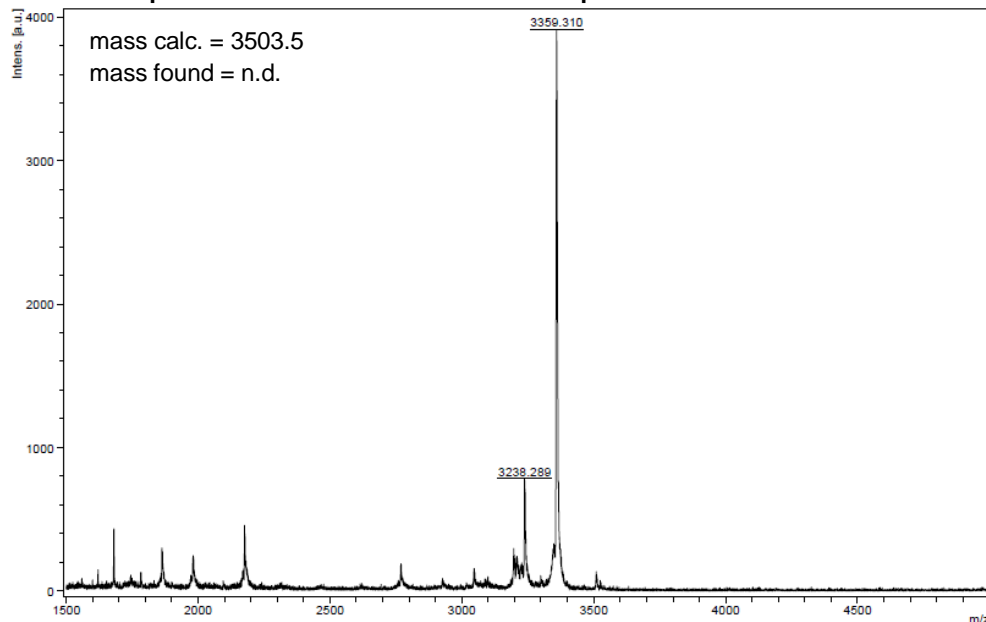

**DNA conjugate 16r:** CPG-coupled 10mer ATGC-aldehyde conjugate **15a** was reacted with propylamine **12r** and Danishefsky's diene **13** according to RP-07 (1000 equiv. of amine were used, 100 equiv. of Yb(OTf)<sub>3</sub> were used instead of 50 equiv. of ZnCl<sub>2</sub>).

**HPLC trace of crude reaction mixture 16r (Analytical RP-HPLC, Method-II)**

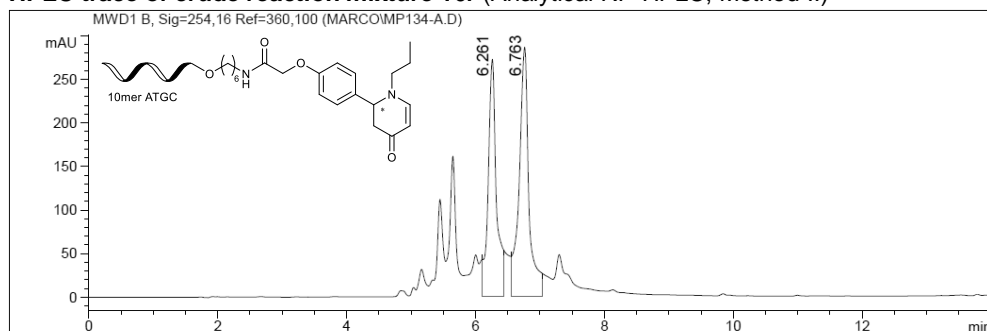

Peak list:

| Ret. Time | Width min | Height  | Area     | Area % |
|-----------|-----------|---------|----------|--------|
| 6.261     | 0.147     | 271.945 | 2399.725 | 44.316 |
| 6.763     | 0.176     | 285.646 | 3015.307 | 55.684 |

**HPLC trace of isolated product 16r (Analytical RP-HPLC, Method-II)**

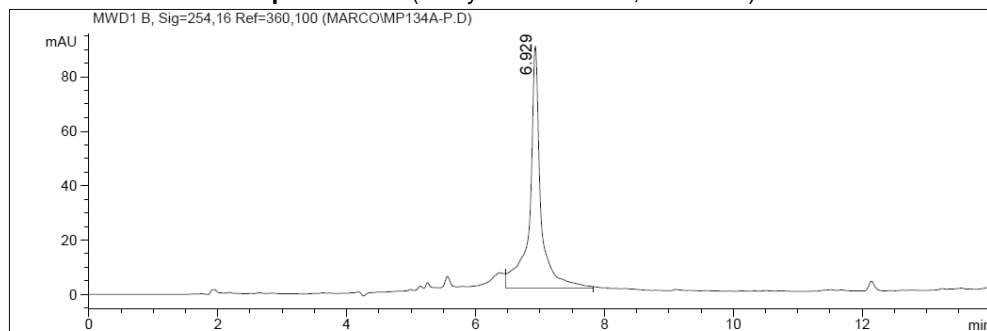

Peak list:

| Ret. Time | Width min | Height | Area     | Area %  |
|-----------|-----------|--------|----------|---------|
| 6.929     | 0.197     | 89.020 | 1053.850 | 100.000 |

**MALDI-MS spectrum of isolated product 16r**

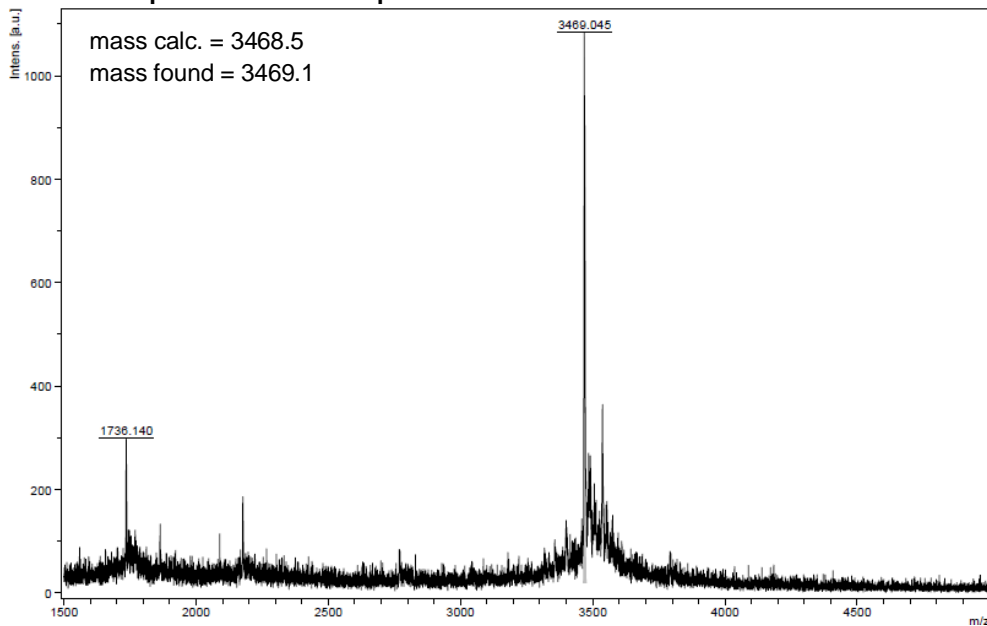

**Table S7** Optimization of ZnCl<sub>2</sub>-mediated aza-Diels-Alder reaction with benzaldehyde **18a** and Danishefsky's diene **13** on CPG-coupled 10mer ATGC oligonucleotide-aniline conjugate **17**.

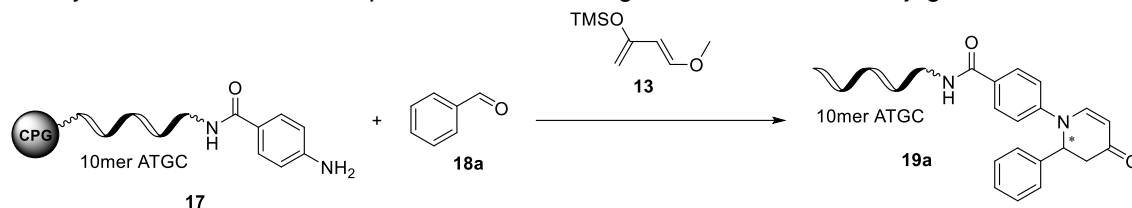

| Entry | Reaction conditions <sup>b</sup>                                                                                                                                                                             | MALDI MS spectra of crude reaction mixtures <sup>c</sup> |
|-------|--------------------------------------------------------------------------------------------------------------------------------------------------------------------------------------------------------------|----------------------------------------------------------|
| 1     | 1. 500 equiv. <b>18a</b><br>ACN/TEOF (2:1), 4 h, rt<br>2. 1000 equiv. <b>13</b><br>100 equiv. ZnCl <sub>2</sub><br>ACN, 1 h, rt<br>3. AMA, 4 h, rt<br><br>=> conversion: <b>traces</b>                       |                                                          |
| 2     | 1. <b>1500</b> equiv. <b>18a</b><br><b>THF</b> /TEOF (2:1), 4 h, rt<br>2. 1000 equiv. <b>13</b><br>100 equiv. ZnCl <sub>2</sub><br><b>THF</b> , 1 h, rt<br>3. AMA, 4 h, rt<br><br>=> conversion: ~ 60%       |                                                          |
| 3     | 1. 1500 equiv. <b>18a</b><br>THF/TEOF (2:1), 4 h, rt<br>2. 1000 equiv. <b>13</b><br>100 equiv. ZnCl <sub>2</sub><br>THF, 1 h, rt<br>3. <b>aq. 30% NH<sub>3</sub>, 6 h, 50 °C</b><br><br>=> conversion: ~ 60% |                                                          |

<sup>a</sup> Condensation of CPG-coupled 10mer ATGC-aniline conjugate **17** (20 nmol) with benzaldehyde **18a** (X equiv.) in 36  $\mu$ L of indicated solvent/triethyl orthoformate (2:1) at ambient temperature for 4 h, then ZnCl<sub>2</sub> (100 equiv.) suspended in 30  $\mu$ L of indicated solvent and Danishefsky's diene **13** (1000 equiv.) were added, the reaction mixture was shaken at ambient temperature for 1 h. <sup>b</sup> Changed parameters are in bold and italic. <sup>c</sup> Measured by MALDI-MS. 10mer ATGC = 5'-GTC ATG ATC T-3'. n.d. = not detected. TEOF = triethyl orthoformate.

**Table S8** – Scope of ZnCl<sub>2</sub>-mediated aza-Diels-Alder reaction with Danishefsky's diene on CPG-coupled 10mer ATGC oligonucleotide-aniline conjugate using different aldehydes.<sup>a</sup>

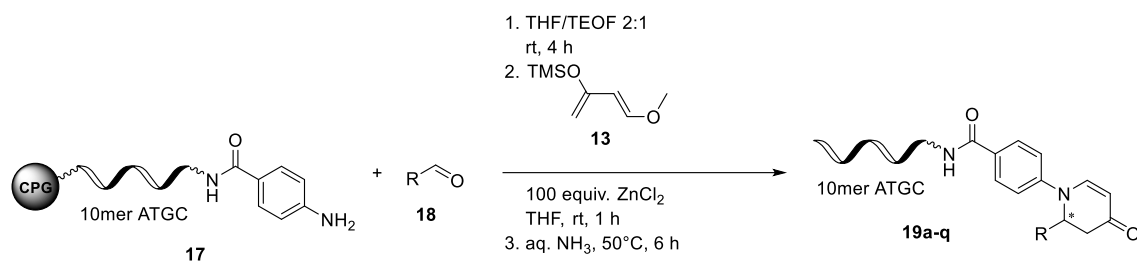

| Entry | Product | Aldehyde | Conversion [%] <sup>b</sup> | Mass <sup>calc.</sup><br>Mass <sup>found</sup> <sup>c</sup> |
|-------|---------|----------|-----------------------------|-------------------------------------------------------------|
| 1     | 19a     | <br>18a  | 62                          | 3472.5<br>3473.3                                            |
| 2     | 19b     | <br>18b  | 60                          | 3551.4<br>3552.4                                            |
| 3     | 19c     | <br>18c  | 64                          | 3551.4<br>3552.5                                            |
| 4     | 19d     | <br>18d  | 56                          | 3551.4<br>3551.3                                            |
| 5     | 19e     | <br>18e  | 58                          | 3502.5<br>3502.8                                            |
| 6     | 19f     | <br>18f  | 71                          | 3502.5<br>3503.2                                            |
| 7     | 19g     | <br>18g  | 64                          | 3502.5<br>3503.2                                            |
| 8     | 19h     | <br>18h  | 58                          | 3490.5<br>3491.7                                            |
| 9     | 19i     | <br>18i  | 57                          | 3486.5<br>3488.4                                            |
| 10    | 19j     | <br>18j  | 50                          | 3528.6<br>3529.0                                            |
| 11    | 19k     | <br>18k  | 65                          | 3548.6<br>3549.0                                            |
| 12    | 19l     | <br>18l  | 60                          | 3522.5<br>3524.1                                            |



|    |            |                                                                                                 |    |                  |
|----|------------|-------------------------------------------------------------------------------------------------|----|------------------|
| 13 | <b>19m</b> | 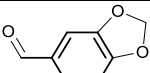<br><b>18m</b> | 48 | 3516.5<br>3518.6 |
| 14 | <b>19n</b> | <br><b>18n</b> | 38 | 3473.5<br>3474.8 |
| 15 | <b>19o</b> | <br><b>18o</b> | 56 | 3462.4<br>3464.1 |
| 16 | <b>19p</b> | <br><b>18p</b> | 34 | 3478.5<br>3478.5 |
| 17 | <b>19q</b> | <br><b>18q</b> | 18 | 3438.5<br>3437.0 |

<sup>a</sup> Condensation of CPG-coupled oligonucleotide conjugate **17** (20 nmol) with aldehyde **18** (1500 equiv., 30  $\mu$ mol) in 36  $\mu$ L tetrahydrofuran/triethyl orthoformate (2:1) at ambient temperature for 4 h, then addition of ZnCl<sub>2</sub> (100 equiv., 2  $\mu$ mol) dissolved in 30  $\mu$ L tetrahydrofuran and Danishefsky's diene **15** (1000 equiv., 20  $\mu$ mol) at ambient temperature for 1 h. DNA cleavage with 30 % aqueous ammonia at 50 °C for 6 h. <sup>b</sup> Determined by analytical RP-HPLC analysis. <sup>c</sup> Measured by MALDI-MS. 10mer ATGC = 5'-GTC ATG ATC T-3'. n.d. = not detected.

## Products of aza-Diels-Alder reaction with Danishefsky's diene on CPG-coupled 10mer ATGC oligonucleotide-aniline conjugate

**DNA conjugate 19a:** CPG-coupled 10mer ATGC-aniline conjugate **17** was reacted with benzaldehyde **18a** and Danishefsky's diene **13** according to RP-08.

### HPLC trace of crude reaction mixture 19a (Analytical RP-HPLC, Method-II)

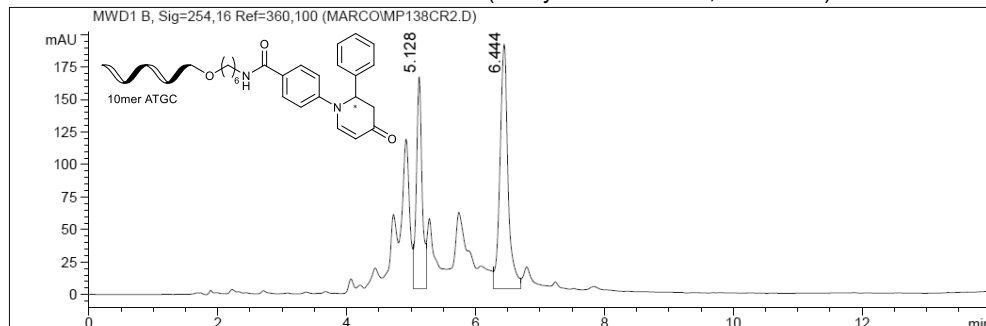

Peak list:

| Ret. Time | Width min | Height  | Area     | Area % |
|-----------|-----------|---------|----------|--------|
| 5.128     | 0.101     | 163.317 | 993.368  | 37.589 |
| 6.444     | 0.146     | 188.069 | 1649.351 | 62.411 |

### HPLC trace of isolated product 19a (Analytical RP-HPLC, Method-II)

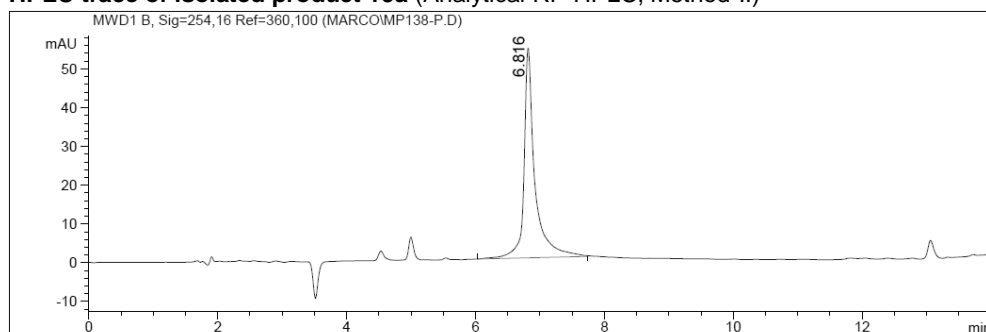

Peak list:

| Ret. Time | Width min | Height | Area    | Area %  |
|-----------|-----------|--------|---------|---------|
| 6.816     | 0.164     | 54.110 | 632.311 | 100.000 |

### MALDI-MS spectrum of isolated product 19a

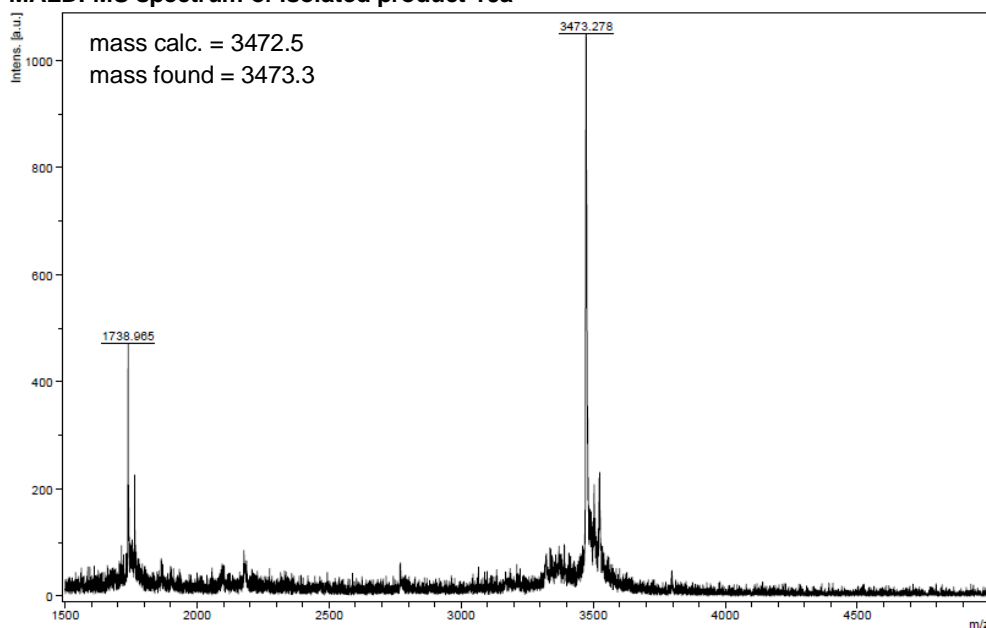

**DNA conjugate 19b:** CPG-coupled 10mer ATGC-aniline conjugate **17** was reacted with 4-bromobenzaldehyde **18b** and Danishefsky's diene **13** according to RP-08.

**HPLC trace of crude reaction mixture 19b (Analytical RP-HPLC, Method-II)**

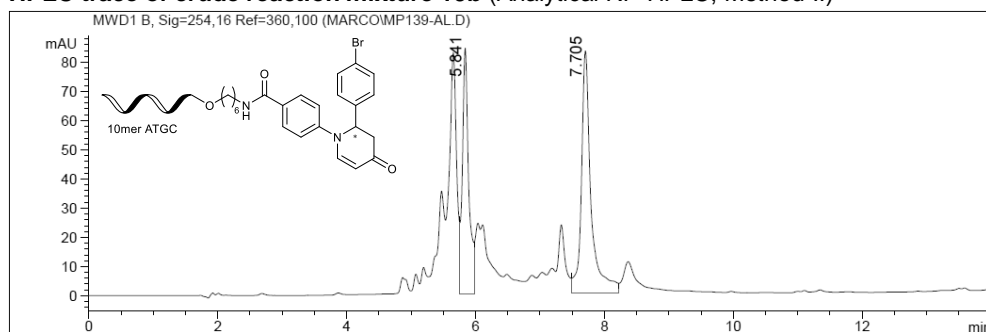

Peak list:

| Ret. Time | Width min | Height | Area    | Area % |
|-----------|-----------|--------|---------|--------|
| 5.841     | 0.113     | 84.160 | 571.159 | 39.796 |
| 7.705     | 0.173     | 83.182 | 864.044 | 60.204 |

**HPLC trace of isolated product 19b (Analytical RP-HPLC, Method-II)**

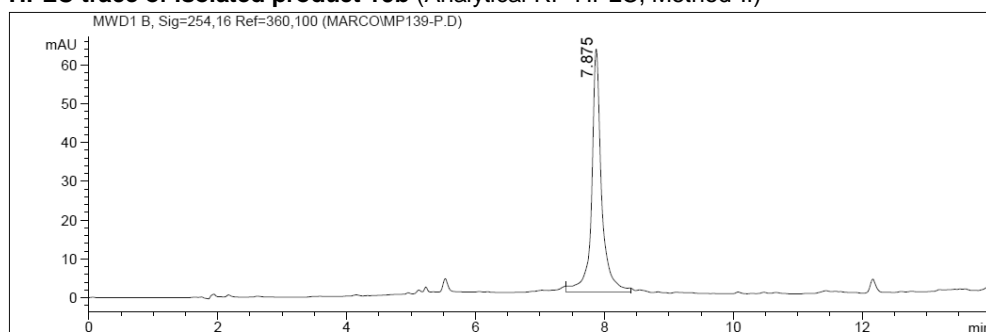

Peak list:

| Ret. Time | Width min | Height | Area    | Area %  |
|-----------|-----------|--------|---------|---------|
| 7.875     | 0.177     | 62.652 | 664.216 | 100.000 |

**MALDI-MS spectrum of isolated product 19b**

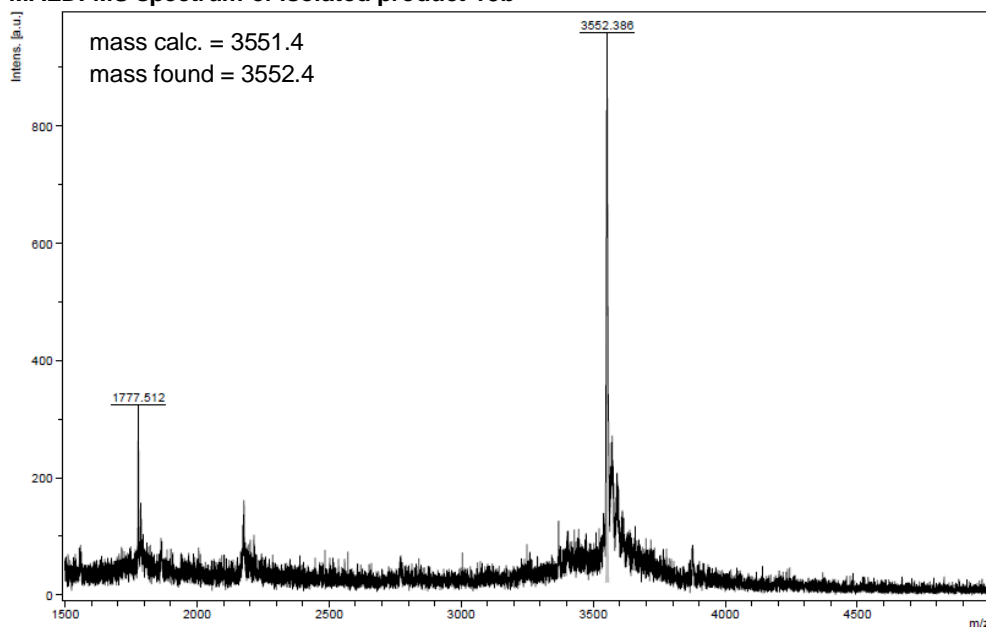

**DNA conjugate 19c:** CPG-coupled 10mer ATGC-aniline conjugate **17** was reacted with 3-bromobenzaldehyde **18c** and Danishefsky's diene **13** according to RP-08.

**HPLC trace of crude reaction mixture 19c (Analytical RP-HPLC, Method-II)**

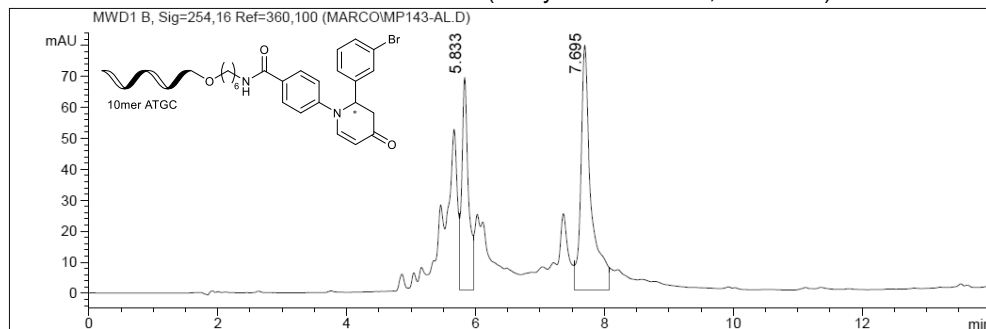

Peak list:

| Ret. Time | Width min | Height | Area    | Area % |
|-----------|-----------|--------|---------|--------|
| 5.833     | 0.117     | 68.815 | 484.264 | 35.791 |
| 7.695     | 0.183     | 79.125 | 868.751 | 64.209 |

**HPLC trace of isolated product 19c (Analytical RP-HPLC, Method-II)**

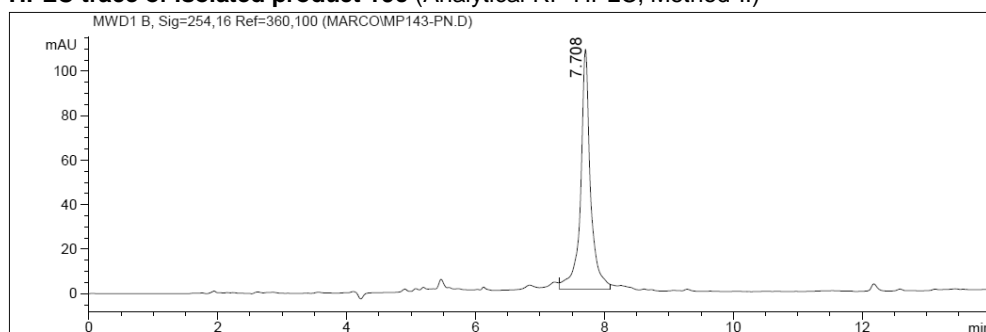

Peak list:

| Ret. Time | Width min | Height  | Area     | Area %  |
|-----------|-----------|---------|----------|---------|
| 7.708     | 0.177     | 108.018 | 1146.097 | 100.000 |

**MALDI-MS spectrum of isolated product 19c**

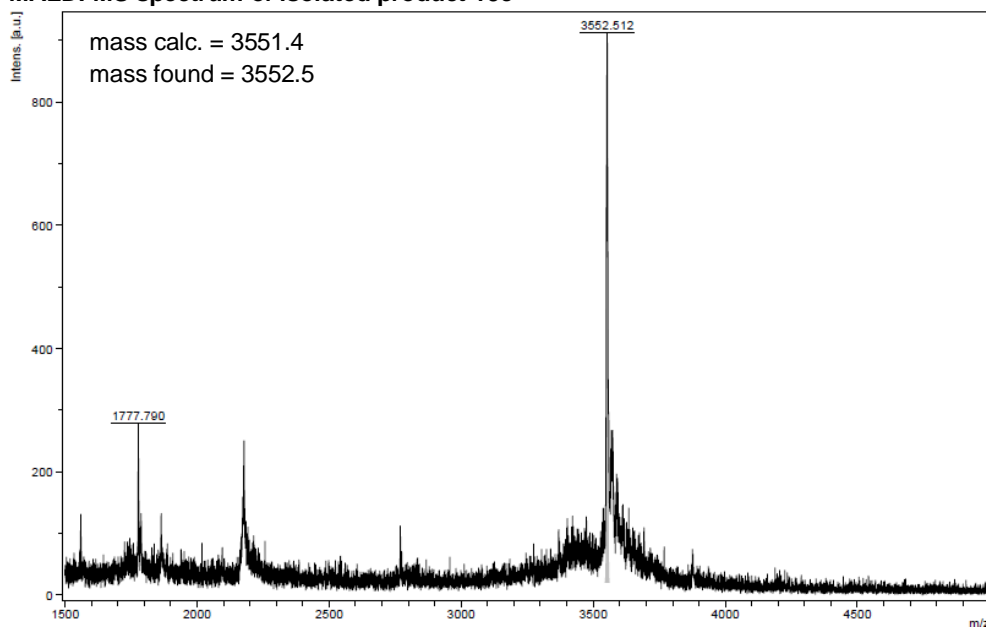

**DNA conjugate 19d:** CPG-coupled 10mer ATGC-aniline conjugate **17** was reacted with 2-bromobenzaldehyde **18d** and Danishefsky's diene **13** according to RP-08.

**HPLC trace of crude reaction mixture 19d** (Analytical RP-HPLC, Method-II)

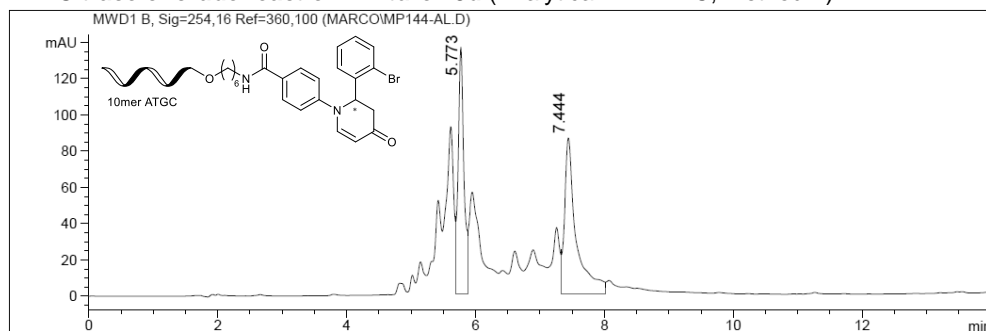

Peak list:

| Ret. Time | Width min | Height  | Area     | Area % |
|-----------|-----------|---------|----------|--------|
| 5.773     | 0.103     | 136.557 | 840.018  | 43.548 |
| 7.444     | 0.210     | 86.380  | 1088.924 | 56.452 |

**HPLC trace of isolated product 19d** (Analytical RP-HPLC, Method-II)

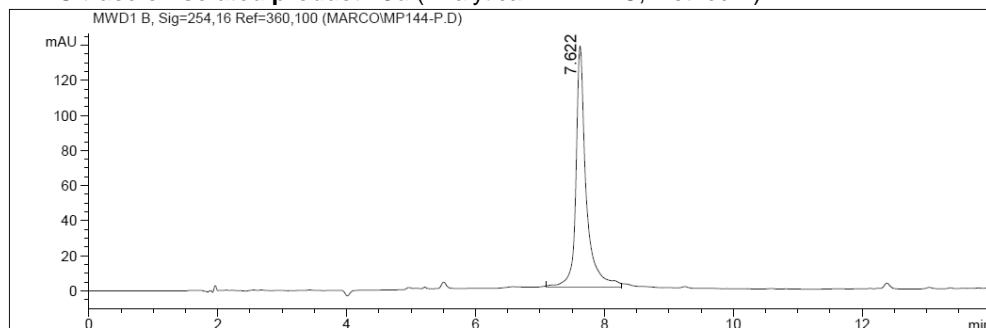

Peak list:

| Ret. Time | Width min | Height  | Area     | Area %  |
|-----------|-----------|---------|----------|---------|
| 7.622     | 0.185     | 137.808 | 1527.506 | 100.000 |

**MALDI-MS spectrum of isolated product 19d**

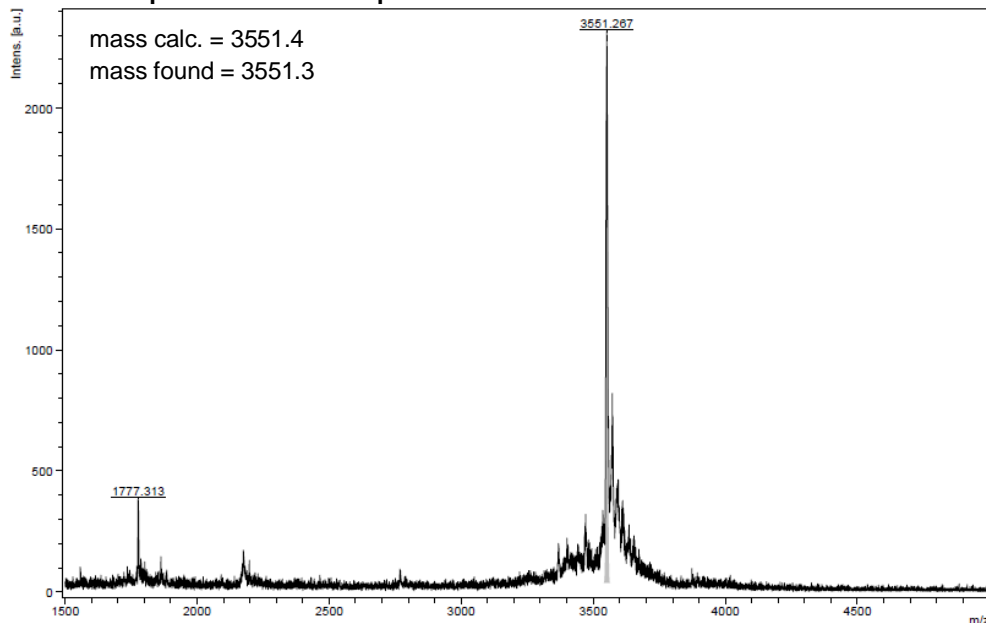

**DNA conjugate 19e:** CPG-coupled 10mer ATGC-aniline conjugate **17** was reacted with 4-methoxybenzaldehyde **18e** and Danishefsky's diene **13** according to RP-08.

**HPLC trace of crude reaction mixture 19e (Analytical RP-HPLC, Method-II)**

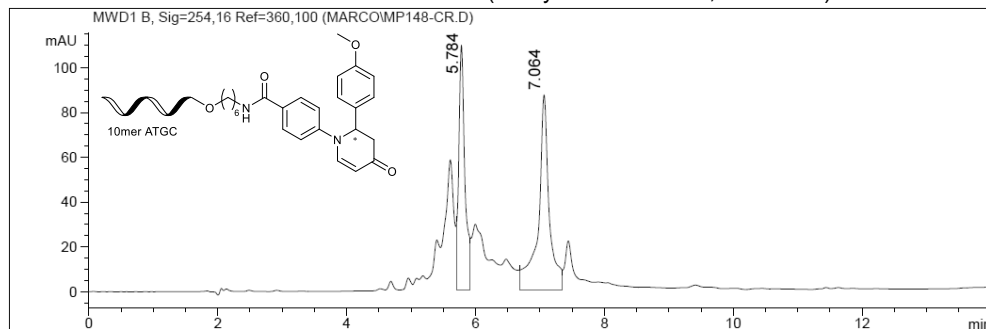

Peak list:

| Ret. Time | Width min | Height  | Area     | Area % |
|-----------|-----------|---------|----------|--------|
| 5.784     | 0.111     | 109.344 | 725.500  | 41.666 |
| 7.064     | 0.194     | 87.057  | 1015.736 | 58.334 |

**HPLC trace of isolated product 19e (Analytical RP-HPLC, Method-II)**

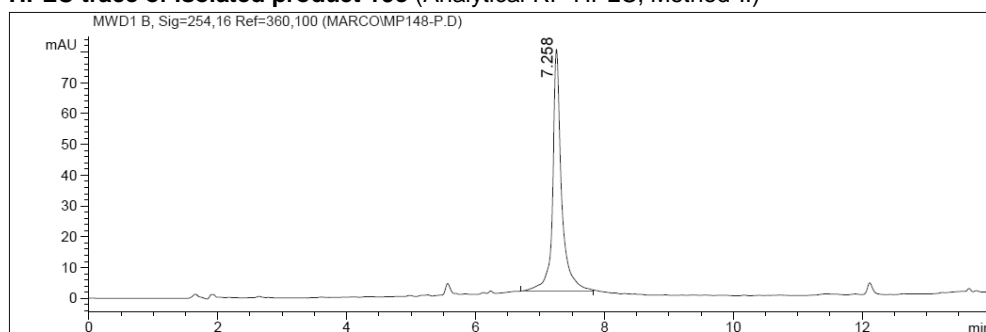

Peak list:

| Ret. Time | Width min | Height | Area    | Area %  |
|-----------|-----------|--------|---------|---------|
| 7.258     | 0.162     | 78.696 | 763.349 | 100.000 |

**MALDI-MS spectrum of isolated product 19e**

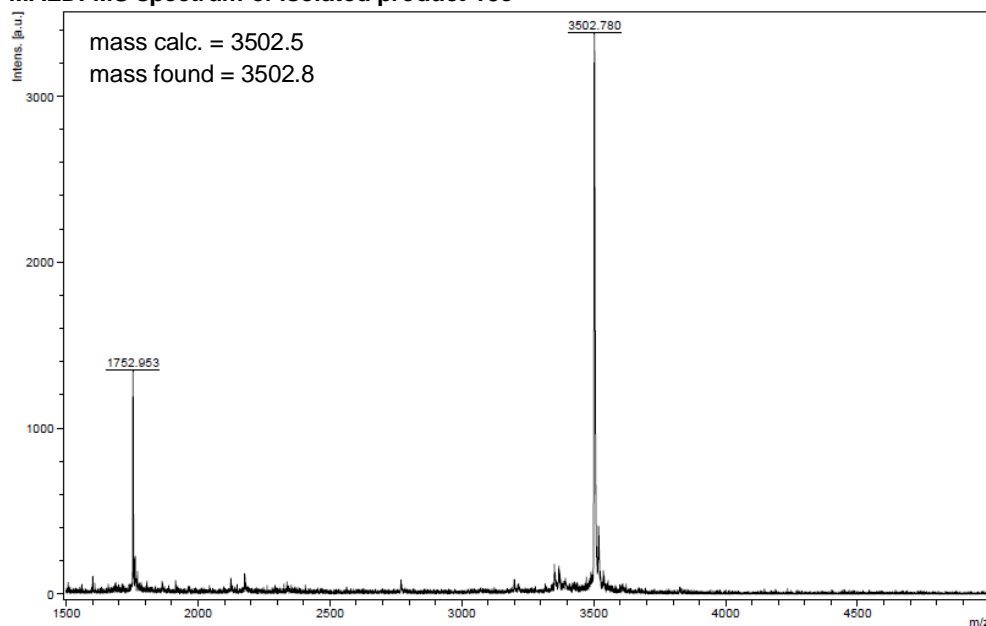

**DNA conjugate 19f:** CPG-coupled 10mer ATGC-aniline conjugate **17** was reacted with 3-methoxybenzaldehyde **18f** and Danishefsky's diene **13** according to RP-08.

**HPLC trace of crude reaction mixture 19f (Analytical RP-HPLC, Method-II)**

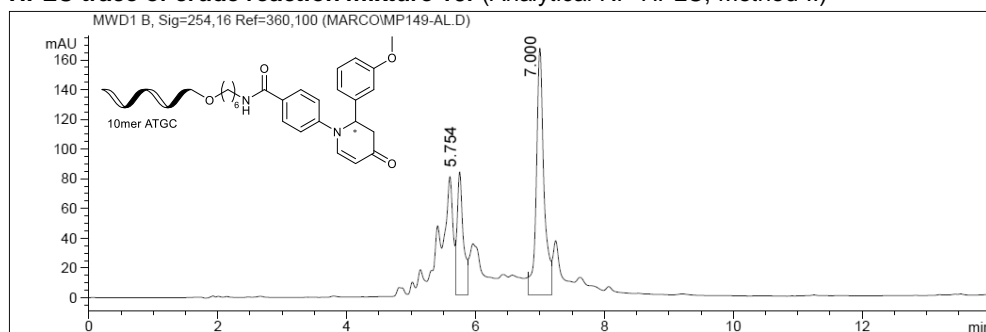

Peak list:

| Ret. Time | Width min | Height  | Area     | Area % |
|-----------|-----------|---------|----------|--------|
| 5.754     | 0.111     | 83.312  | 555.542  | 28.989 |
| 7.000     | 0.136     | 166.735 | 1360.813 | 71.011 |

**HPLC trace of isolated product 19f (Analytical RP-HPLC, Method-II)**

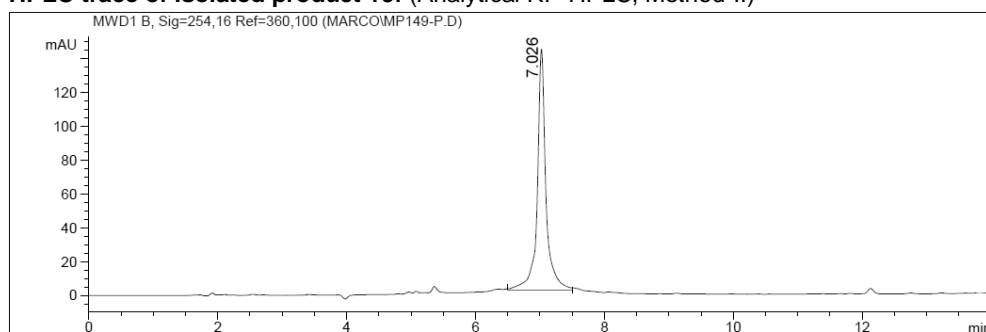

Peak list:

| Ret. Time | Width min | Height  | Area     | Area %  |
|-----------|-----------|---------|----------|---------|
| 7.026     | 0.155     | 142.647 | 1325.466 | 100.000 |

**MALDI-MS spectrum of isolated product 19f**

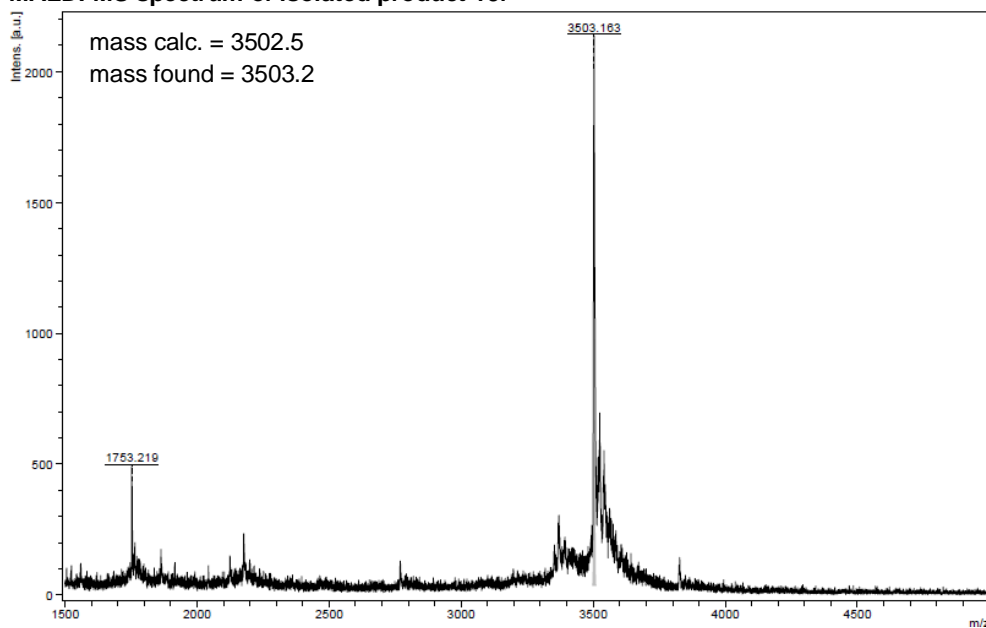

**DNA conjugate 19g:** CPG-coupled 10mer ATGC-aniline conjugate **17** was reacted with 2-methoxybenzaldehyde **18g** and Danishefsky's diene **13** according to RP-08.

**HPLC trace of crude reaction mixture 19g (Analytical RP-HPLC, Method-II)**

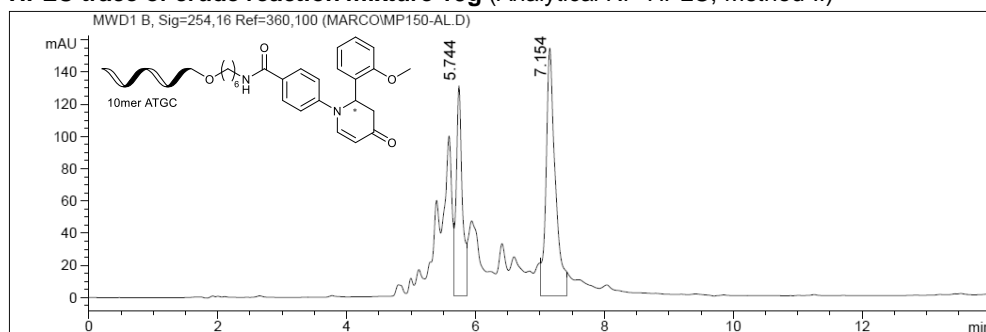

Peak list:

| Ret. Time | Width min | Height  | Area     | Area % |
|-----------|-----------|---------|----------|--------|
| 5.744     | 0.108     | 130.706 | 845.267  | 35.788 |
| 7.154     | 0.164     | 154.065 | 1516.604 | 64.212 |

**HPLC trace of isolated product 19g (Analytical RP-HPLC, Method-II)**

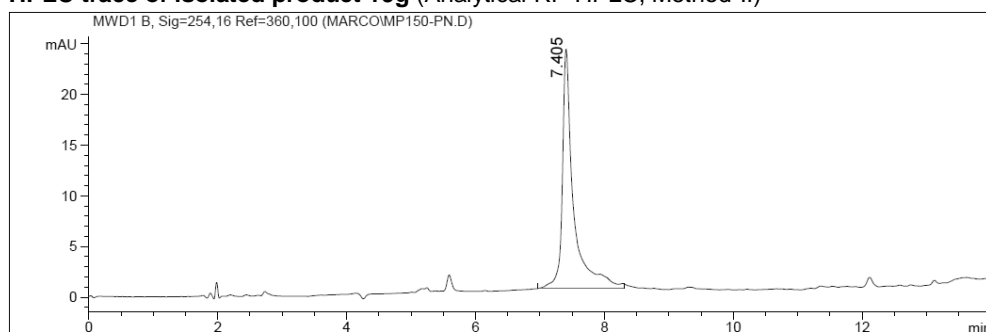

Peak list:

| Ret. Time | Width min | Height | Area    | Area %  |
|-----------|-----------|--------|---------|---------|
| 7.405     | 0.201     | 23.642 | 285.662 | 100.000 |

**MALDI-MS spectrum of isolated product 19g**

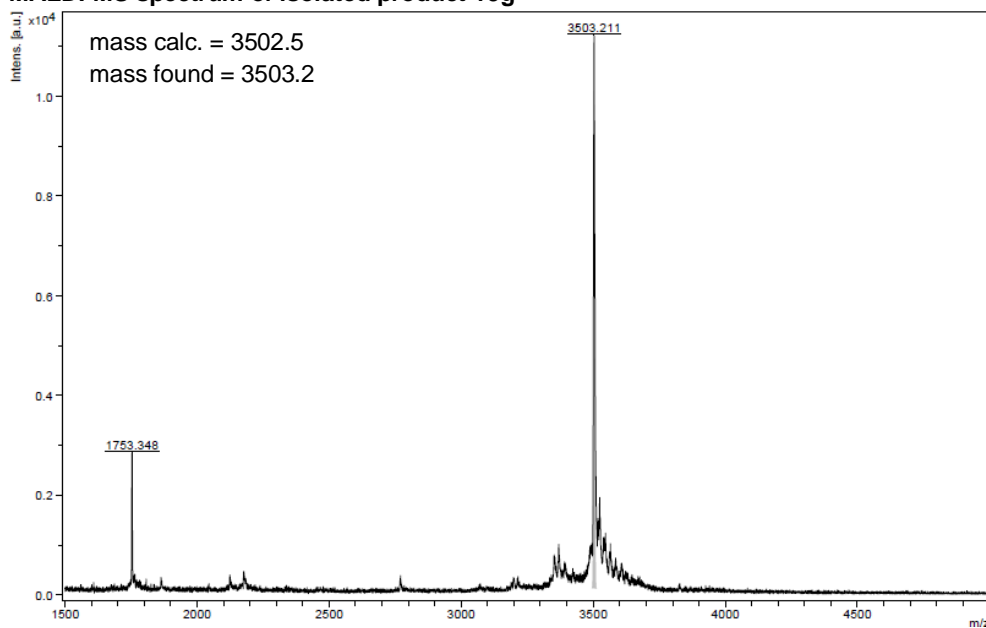



**DNA conjugate 19h:** CPG-coupled 10mer ATGC-aniline conjugate **17** was reacted with 4-fluorobenzaldehyde **18h** and Danishefsky's diene **13** according to RP-08.

**HPLC trace of crude reaction mixture 19h (Analytical RP-HPLC, Method-II)**

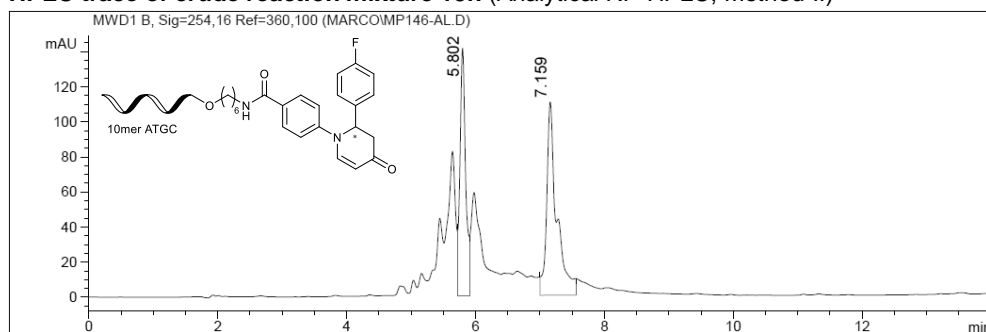

Peak list:

| Ret. Time | Width min | Height  | Area     | Area % |
|-----------|-----------|---------|----------|--------|
| 5.802     | 0.100     | 141.245 | 847.449  | 41.605 |
| 7.159     | 0.180     | 110.390 | 1189.461 | 58.395 |

**HPLC trace of isolated product 19h (Analytical RP-HPLC, Method-II)**

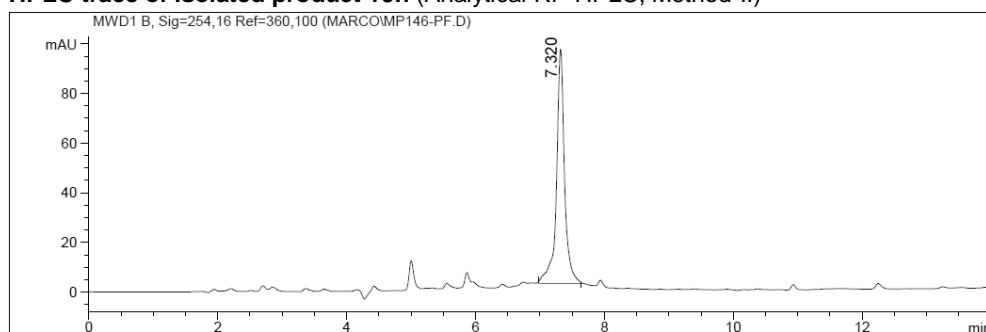

Peak list:

| Ret. Time | Width min | Height | Area    | Area %  |
|-----------|-----------|--------|---------|---------|
| 7.320     | 0.145     | 94.654 | 824.639 | 100.000 |

**MALDI-MS spectrum of isolated product 19h**

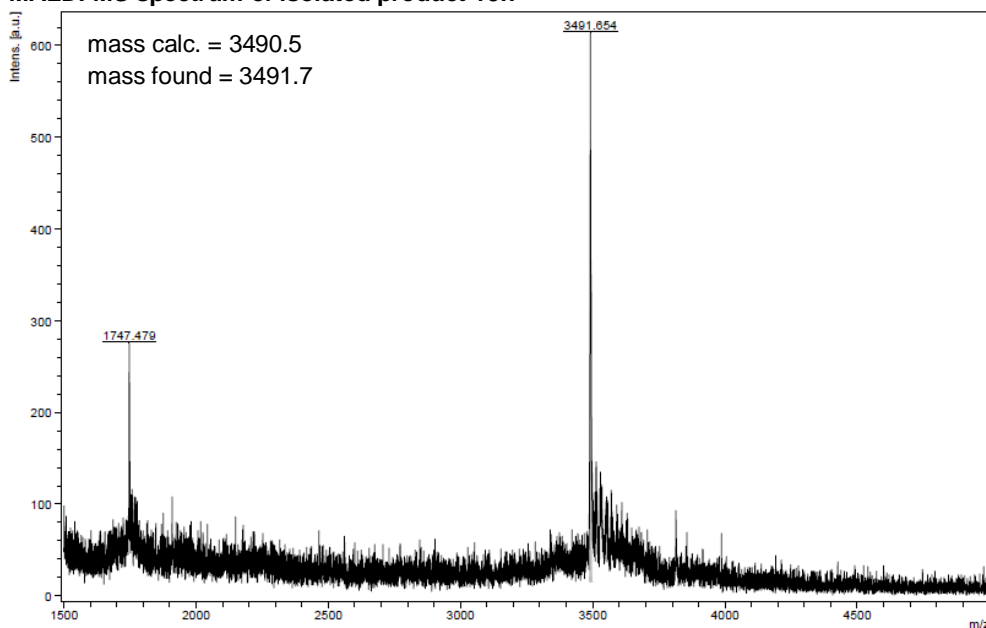

**DNA conjugate 19i:** CPG-coupled 10mer ATGC-aniline conjugate **17** was reacted with 4-methylbenzaldehyde **18i** and Danishefsky's diene **13** according to RP-08.

**HPLC trace of crude reaction mixture 19i (Analytical RP-HPLC, Method-II)**

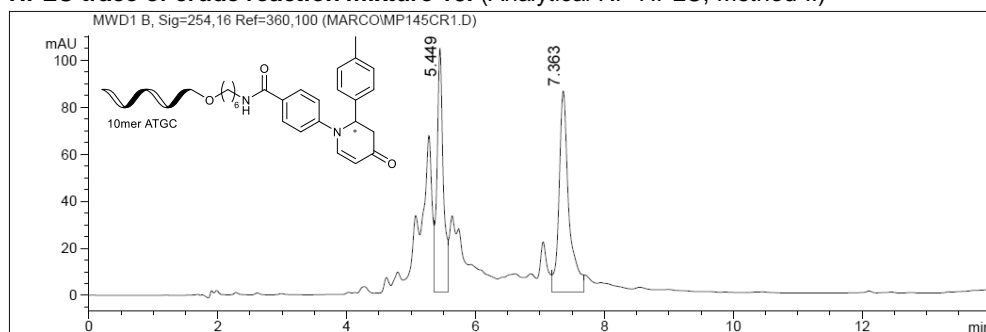

Peak list:

| Ret. Time | Width min | Height  | Area    | Area % |
|-----------|-----------|---------|---------|--------|
| 5.449     | 0.110     | 104.130 | 688.043 | 43.079 |
| 7.363     | 0.177     | 85.811  | 909.125 | 56.921 |

**HPLC trace of isolated product 19i (Analytical RP-HPLC, Method-II)**

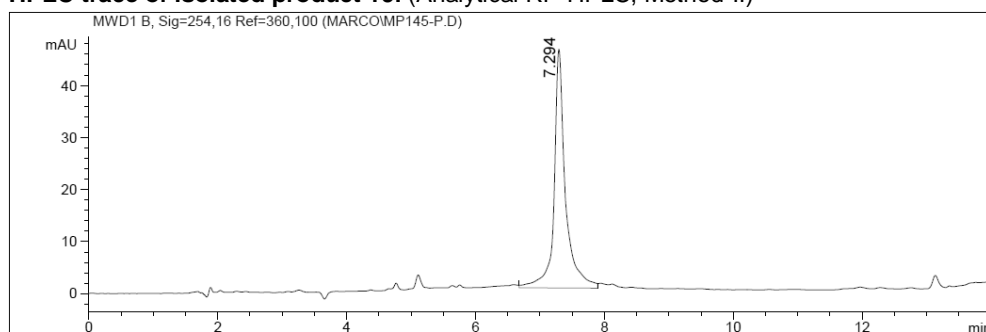

Peak list:

| Ret. Time | Width min | Height | Area    | Area %  |
|-----------|-----------|--------|---------|---------|
| 7.294     | 0.173     | 45.899 | 564.514 | 100.000 |

**MALDI-MS spectrum of isolated product 19i**

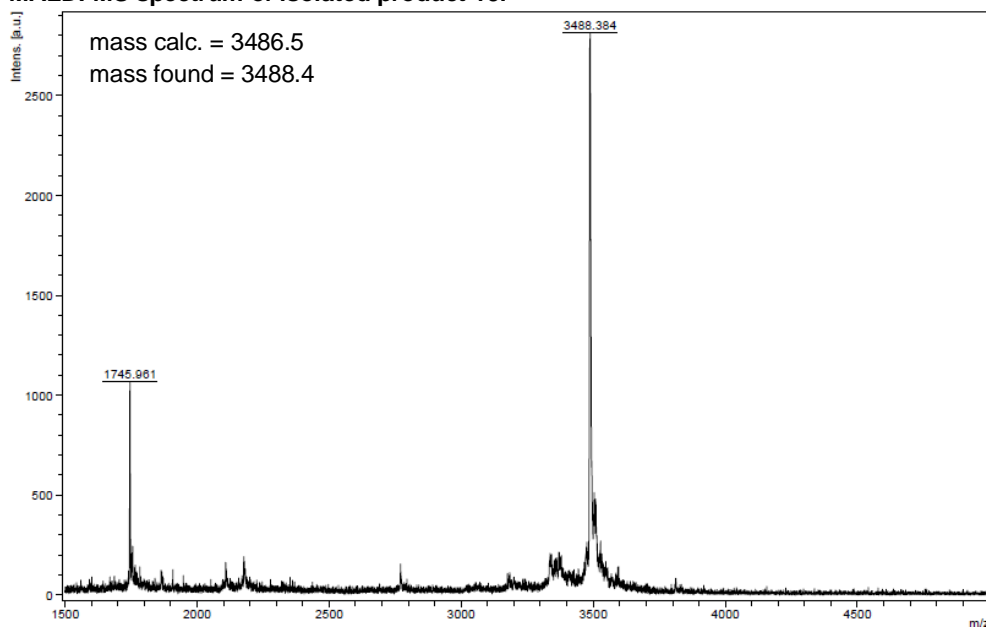

**DNA conjugate 19j:** CPG-coupled 10mer ATGC-aniline conjugate **17** was reacted with 4-*tert*-butylbenzaldehyde **18j** and Danishefsky's diene **13** according to RP-08.

**HPLC trace of crude reaction mixture 19j (Analytical RP-HPLC, Method-II)**

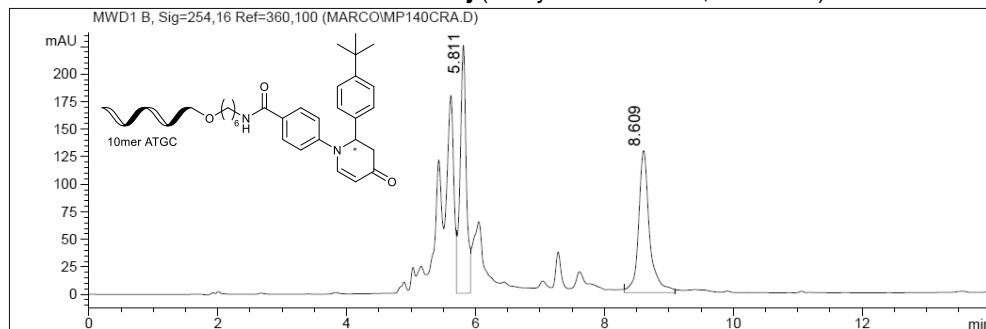

Peak list:

| Ret. Time | Width min | Height  | Area     | Area % |
|-----------|-----------|---------|----------|--------|
| 5.811     | 0.111     | 225.544 | 1505.354 | 49.837 |
| 8.609     | 0.196     | 128.977 | 1515.207 | 50.163 |

**HPLC trace of isolated product 19j (Analytical RP-HPLC, Method-II)**

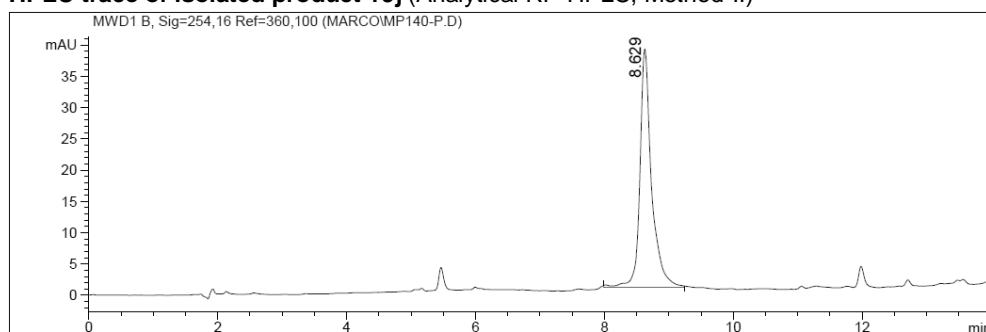

Peak list:

| Ret. Time | Width min | Height | Area    | Area %  |
|-----------|-----------|--------|---------|---------|
| 8.629     | 0.210     | 38.134 | 480.948 | 100.000 |

**MALDI-MS spectrum of isolated product 19j**

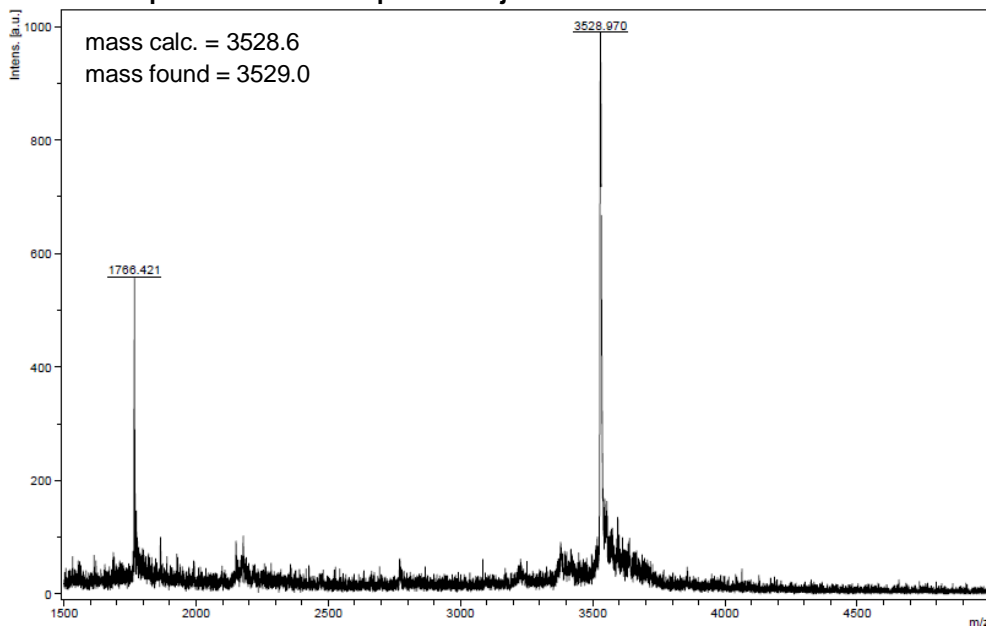

**DNA conjugate 19k:** CPG-coupled 10mer ATGC-aniline conjugate **17** was reacted with 4-phenylbenzaldehyde **18k** and Danishefsky's diene **13** according to RP-08.

**HPLC trace of crude reaction mixture 19k (Analytical RP-HPLC, Method-II)**

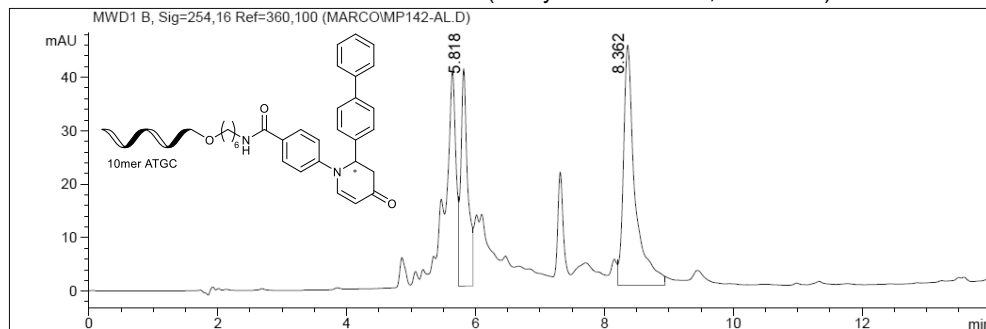

Peak list:

| Ret. Time | Width min | Height | Area    | Area % |
|-----------|-----------|--------|---------|--------|
| 5.818     | 0.125     | 40.785 | 305.138 | 35.237 |
| 8.362     | 0.208     | 44.986 | 560.832 | 64.763 |

**HPLC trace of isolated product 19k (Analytical RP-HPLC, Method-II)**

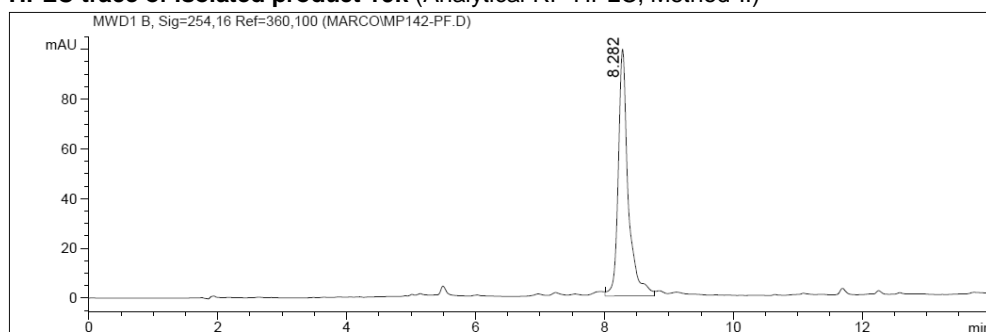

Peak list:

| Ret. Time | Width min | Height | Area     | Area %  |
|-----------|-----------|--------|----------|---------|
| 8.282     | 0.156     | 99.102 | 1055.324 | 100.000 |

**MALDI-MS spectrum of isolated product 19k**

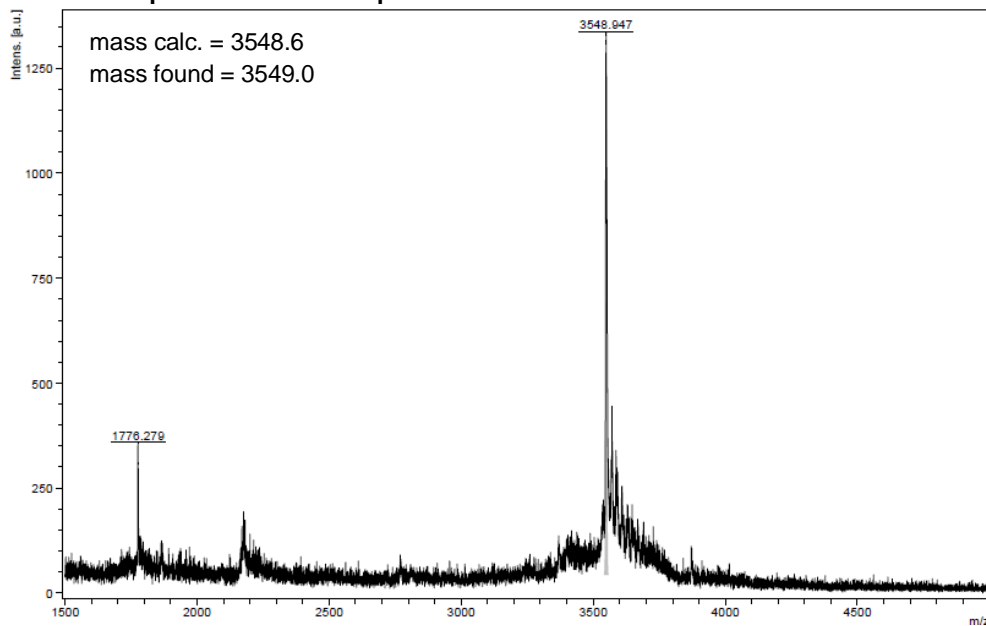

**DNA conjugate 19I:** CPG-coupled 10mer ATGC-aniline conjugate **17** was reacted with 2-Naphthaldehyde **18I** and Danishefsky's diene **13** according to RP-08.

**HPLC trace of crude reaction mixture 19I (Analytical RP-HPLC, Method-II)**

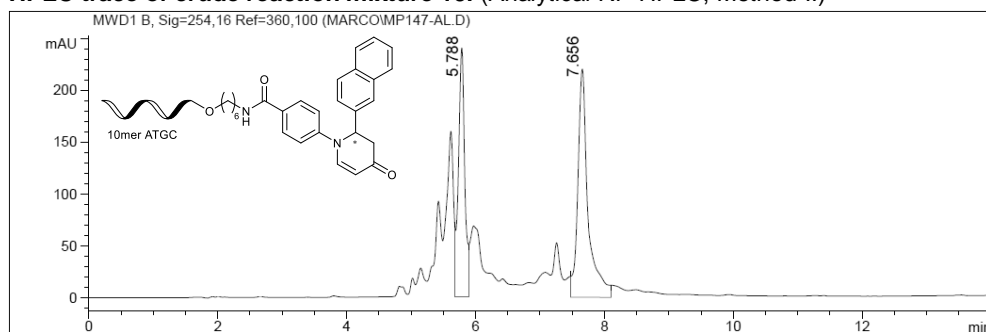

Peak list:

| Ret. Time | Width min | Height  | Area     | Area % |
|-----------|-----------|---------|----------|--------|
| 5.788     | 0.113     | 240.849 | 1630.942 | 40.280 |
| 7.656     | 0.183     | 220.402 | 2418.100 | 59.720 |

**HPLC trace of isolated product 19I (Analytical RP-HPLC, Method-II)**

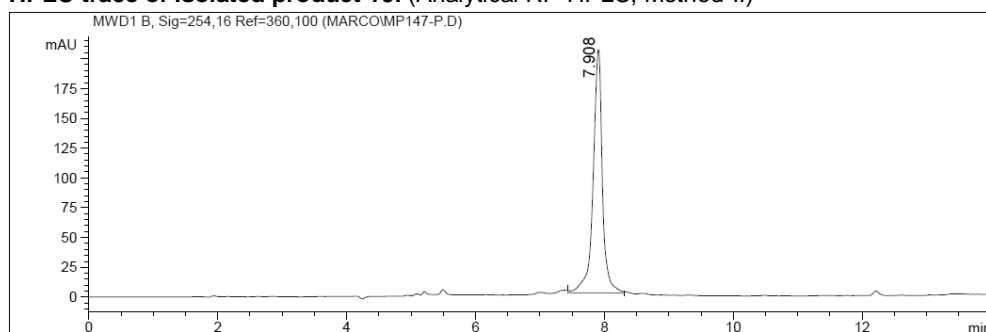

Peak list:

| Ret. Time | Width min | Height  | Area     | Area %  |
|-----------|-----------|---------|----------|---------|
| 7.908     | 0.167     | 204.996 | 2055.109 | 100.000 |

**MALDI-MS spectrum of isolated product 19I**

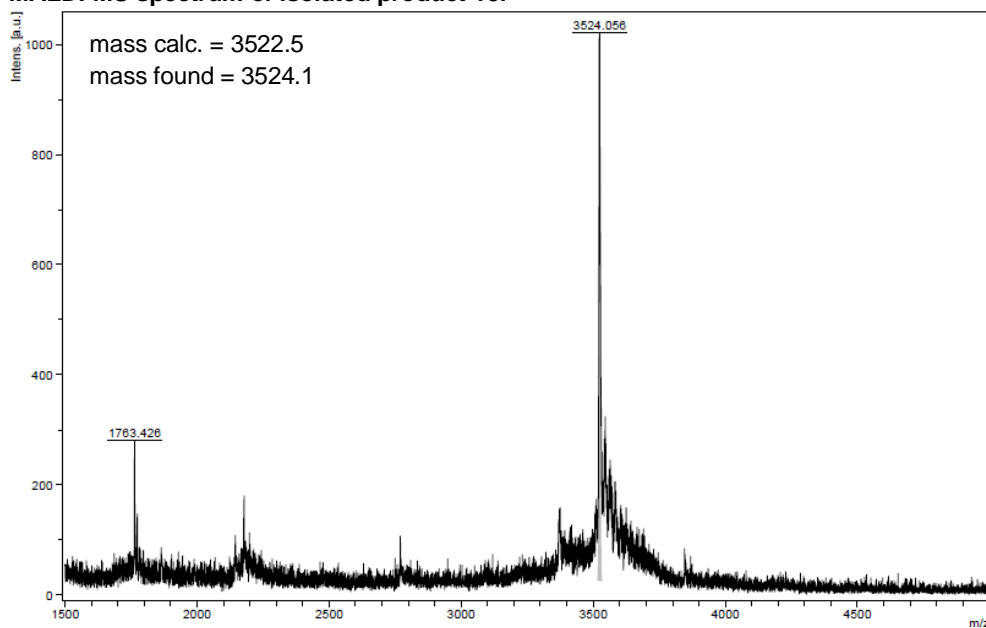

**DNA conjugate 19m:** CPG-coupled 10mer ATGC-aniline conjugate **17** was reacted with piperonyl aldehyde **18m** and Danishefsky's diene **13** according to RP-08.

**HPLC trace of crude reaction mixture 19m (Analytical RP-HPLC, Method-II)**

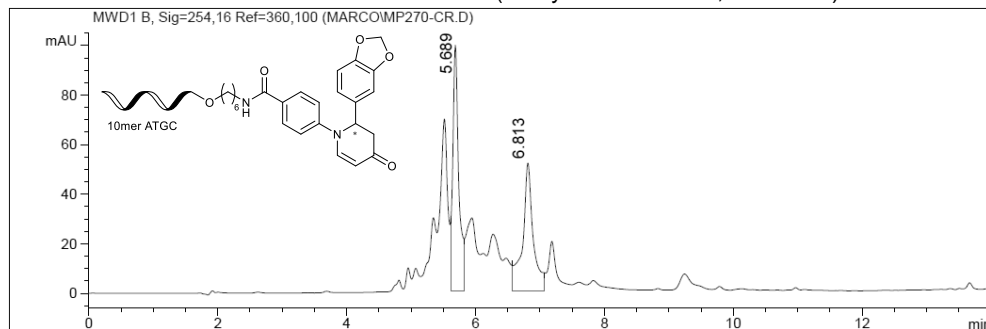

Peak list:

| Ret. Time | Width min | Height | Area    | Area % |
|-----------|-----------|--------|---------|--------|
| 5.689     | 0.107     | 99.124 | 638.691 | 52.502 |
| 6.813     | 0.187     | 51.512 | 577.815 | 47.498 |

**HPLC trace of isolated product 19m (Analytical RP-HPLC, Method-II)**

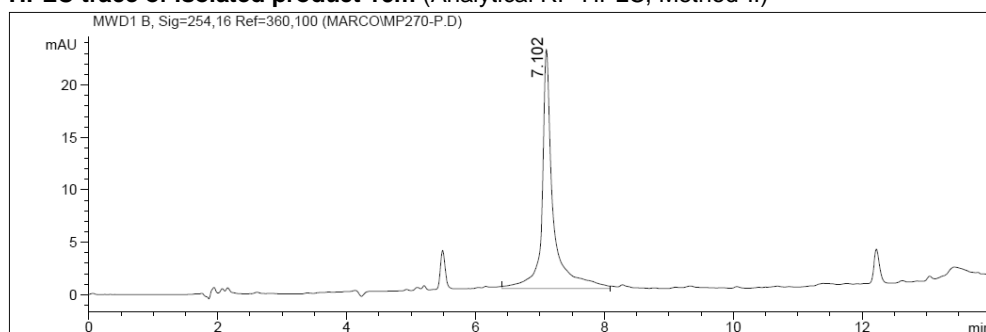

Peak list:

| Ret. Time | Width min | Height | Area    | Area %  |
|-----------|-----------|--------|---------|---------|
| 7.102     | 0.163     | 22.801 | 272.139 | 100.000 |

**MALDI-MS spectrum of isolated product 19m**

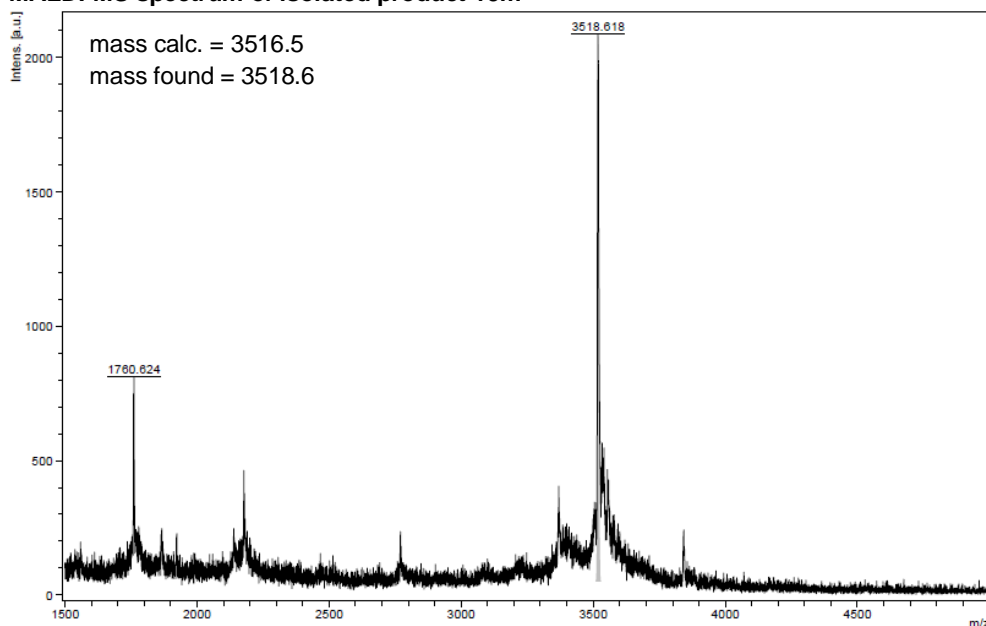

**DNA conjugate 19n:** CPG-coupled 10mer ATGC-aniline conjugate **17** was reacted with 2-pyridinecarbox-aldehyde **18n** and Danishefsky's diene **13** according to RP-08.

**HPLC trace of crude reaction mixture 19n (Analytical RP-HPLC, Method-II)**

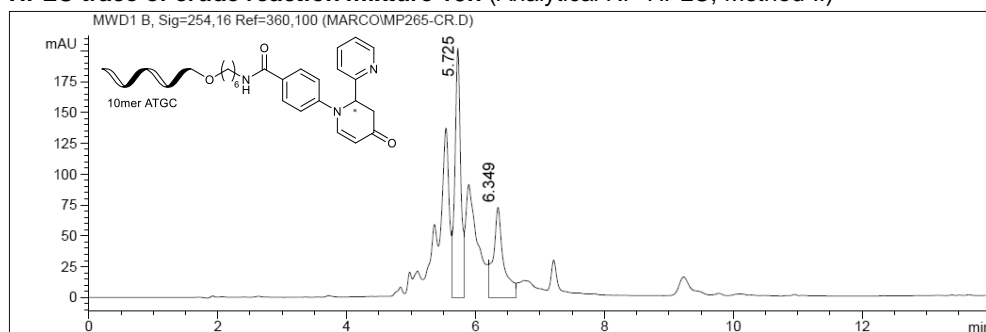

Peak list:

| Ret. Time | Width min | Height  | Area     | Area % |
|-----------|-----------|---------|----------|--------|
| 5.725     | 0.106     | 202.771 | 1295.430 | 61.531 |
| 6.349     | 0.183     | 73.610  | 809.890  | 38.469 |

**HPLC trace of isolated product 19n (Analytical RP-HPLC, Method-II)**

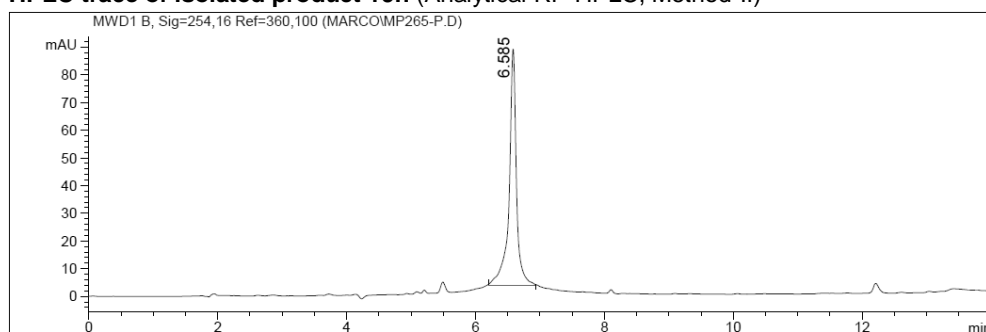

Peak list:

| Ret. Time | Width min | Height | Area    | Area %  |
|-----------|-----------|--------|---------|---------|
| 6.585     | 0.133     | 85.834 | 684.034 | 100.000 |

**MALDI-MS spectrum of isolated product 19n**

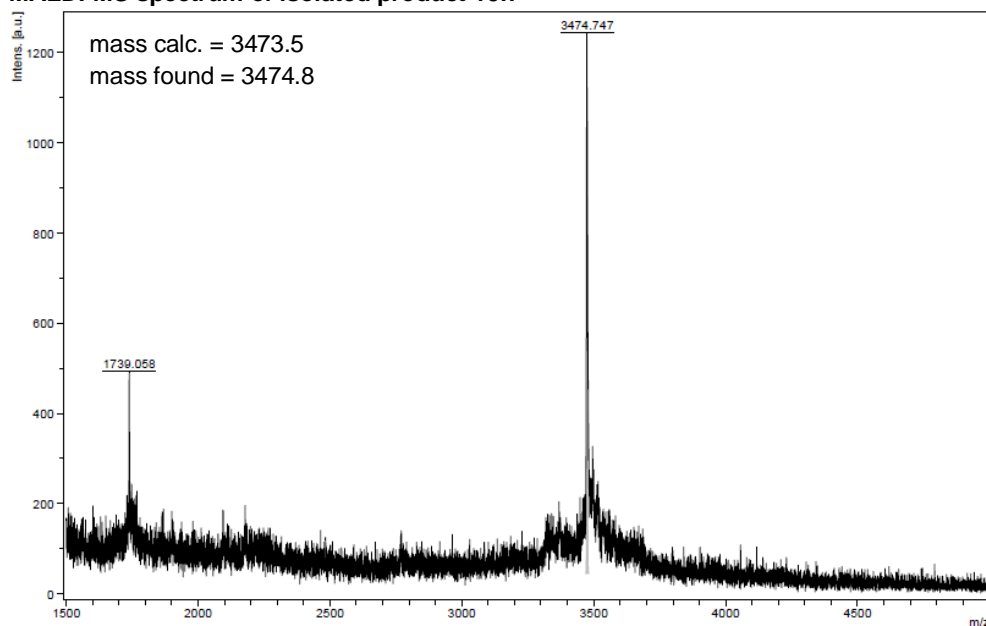

**DNA conjugate 19o:** CPG-coupled 10mer ATGC-aniline conjugate **17** was reacted with 3-furancarboxaldehyde **18o** and Danishefsky's diene **13** according to RP-08.

**HPLC trace of crude reaction mixture 19o (Analytical RP-HPLC, Method-II)**

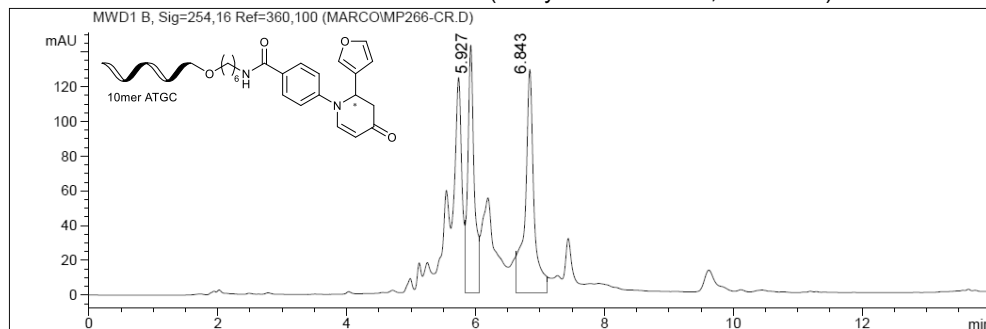

Peak list:

| Ret. Time | Width min | Height  | Area     | Area % |
|-----------|-----------|---------|----------|--------|
| 5.927     | 0.113     | 143.131 | 972.186  | 44.381 |
| 6.843     | 0.157     | 129.107 | 1218.370 | 55.619 |

**HPLC trace of isolated product 19o (Analytical RP-HPLC, Method-II)**

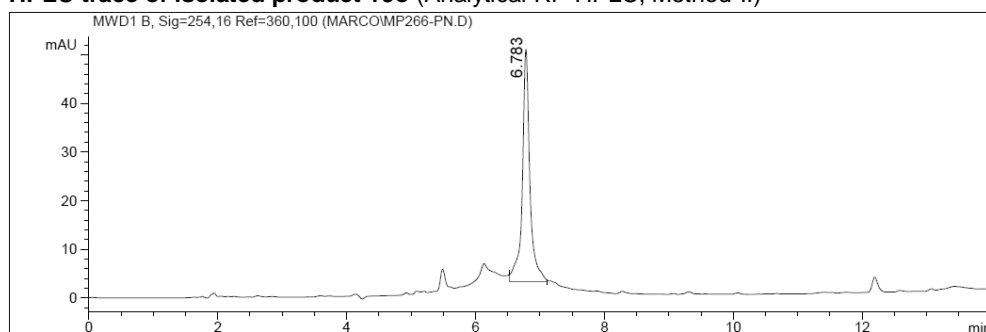

Peak list:

| Ret. Time | Width min | Height | Area    | Area %  |
|-----------|-----------|--------|---------|---------|
| 6.783     | 0.137     | 47.909 | 392.414 | 100.000 |

**MALDI-MS spectrum of isolated product 19o**

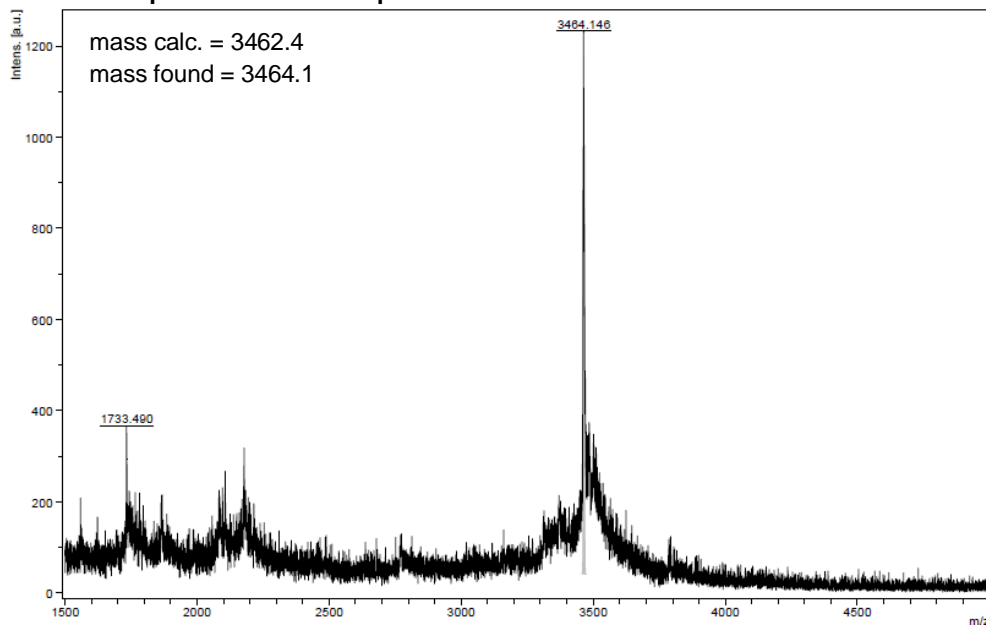



**DNA conjugate 19p:** CPG-coupled 10mer ATGC-aniline conjugate **17** was reacted with cyclohexanecarbox-aldehyde **18p** and Danishefsky's diene **13** according to RP-08.

**HPLC trace of crude reaction mixture 19p (Analytical RP-HPLC, Method-II)**

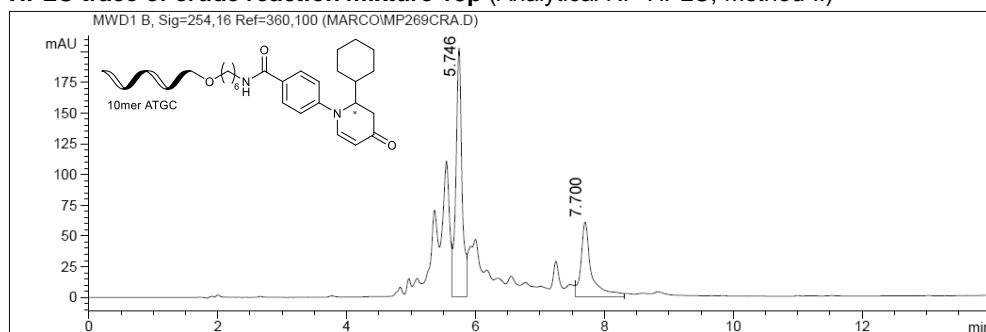

Peak list:

| Ret. Time | Width min | Height  | Area     | Area % |
|-----------|-----------|---------|----------|--------|
| 5.746     | 0.109     | 203.173 | 1326.133 | 65.765 |
| 7.700     | 0.189     | 60.841  | 690.349  | 34.235 |

**HPLC trace of isolated product 19p (Analytical RP-HPLC, Method-II)**

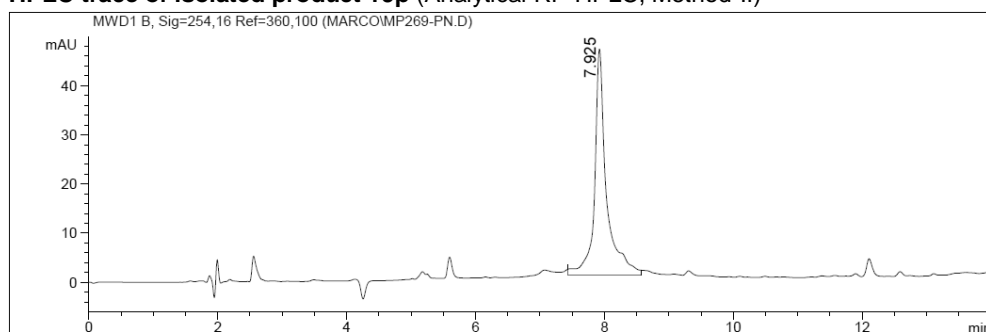

Peak list:

| Ret. Time | Width min | Height | Area    | Area %  |
|-----------|-----------|--------|---------|---------|
| 7.925     | 0.213     | 46.069 | 590.128 | 100.000 |

**MALDI-MS spectrum of isolated product 19p**

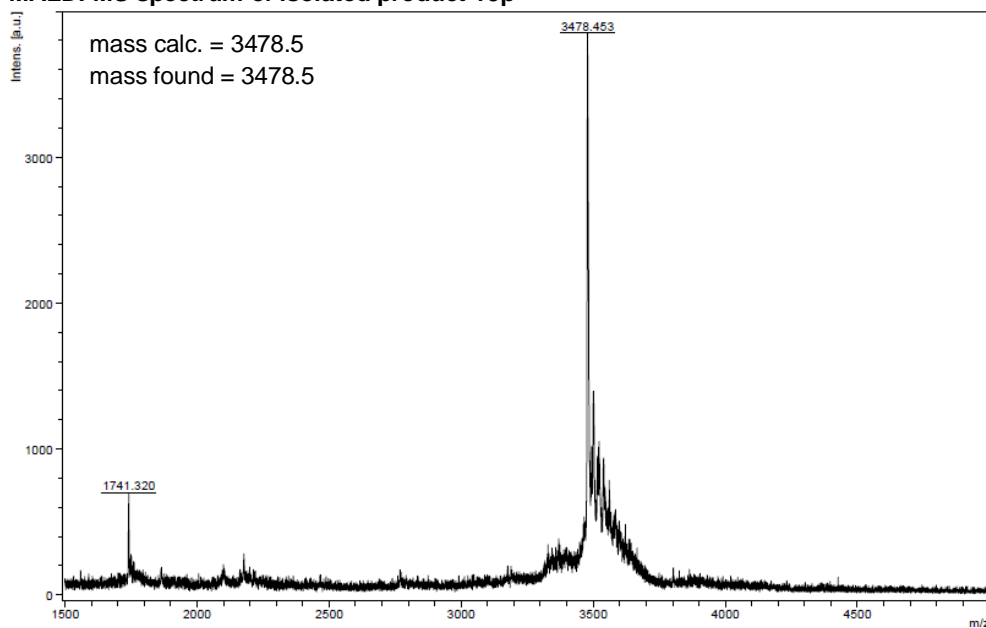

**DNA conjugate 19q:** CPG-coupled 10mer ATGC-aniline conjugate **17** was reacted with isobutyraldehyde **18q** and Danishefsky's diene **13** according to RP-08.

**HPLC trace of crude reaction mixture 19q (Analytical RP-HPLC, Method-II)**

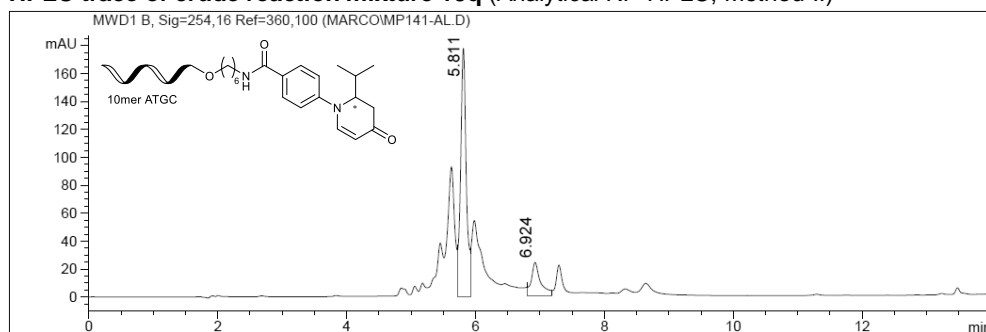

Peak list:

| Ret. Time | Width min | Height  | Area     | Area % |
|-----------|-----------|---------|----------|--------|
| 5.811     | 0.102     | 178.303 | 1095.891 | 81.668 |
| 6.924     | 0.169     | 24.237  | 245.991  | 18.332 |

**MALDI-MS spectrum of isolated product 19q**

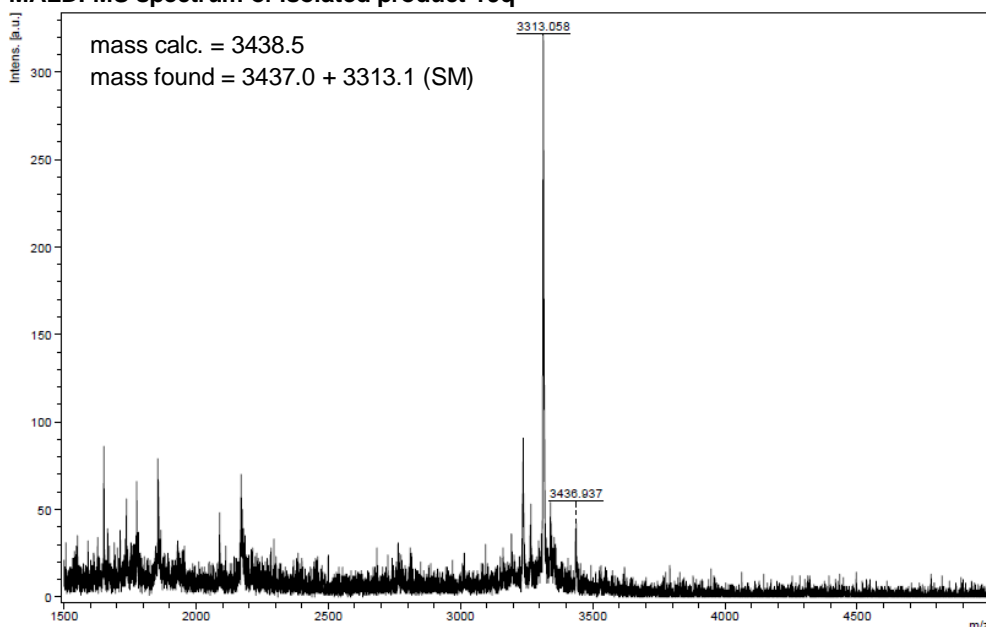

## (R)-(-)-BNDHP-mediated Povarov reaction on CPG-coupled oligonucleotides

**Table S9** Optimization of (R)-(-)-BNDHP-mediated Povarov reaction CPG-coupled hexT-aldehyde conjugate.<sup>a</sup>

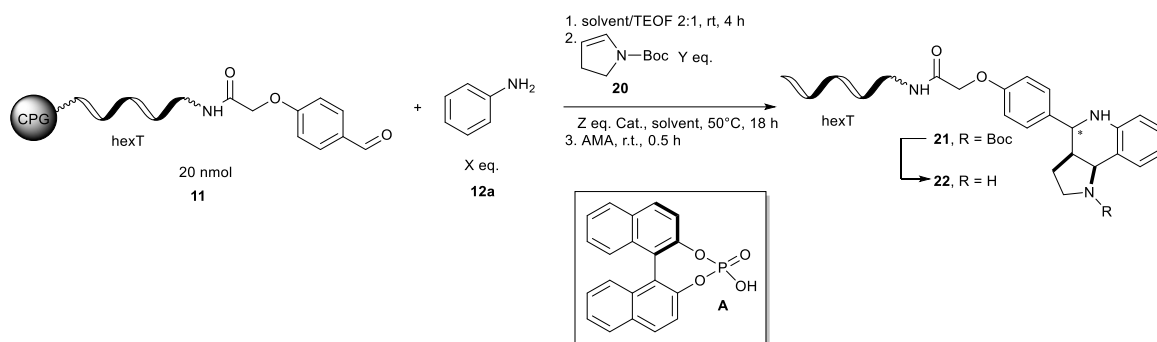

| Entry | Reaction conditions <sup>b</sup>                                                                                                                                                                                            | HPLC trace of crude reaction mixture <sup>c</sup> |
|-------|-----------------------------------------------------------------------------------------------------------------------------------------------------------------------------------------------------------------------------|---------------------------------------------------|
| 1     | hexT-aldehyde conjugate <b>11</b>                                                                                                                                                                                           |                                                   |
| 2     | hexT-tetrahydroquinoline conjugate <b>21</b>                                                                                                                                                                                |                                                   |
| 3     | 1. 500 equiv. <b>12a</b><br>CH <sub>2</sub> Cl <sub>2</sub> /TEOF (2:1), 4 h, rt<br>2. 500 equiv. <b>20</b><br>50 equiv. <b>Yb(OTf)<sub>3</sub></b><br>CH <sub>2</sub> Cl <sub>2</sub> , 18 h, rt<br><br>=> conversion 42 % |                                                   |
| 4     | 1. 500 equiv. <b>12a</b><br>THF/TEOF (2:1), 4 h, rt<br>2. 500 equiv. <b>20</b><br>50 equiv. <b>Yb(OTf)<sub>3</sub></b><br>THF, 18 h, 50 °C<br><br>=> conversion 63 %                                                        |                                                   |
| 5     | 1. 500 equiv. <b>12a</b><br>THF/TEOF (2:1), 4 h, rt<br>2. 500 equiv. <b>20</b><br>50 equiv. <b>(R)-(-)-BNDHP A</b><br>THF, 18 h, 50 °C<br><br>=> conversion 82 %                                                            |                                                   |

- 6 1. 500 equiv. **12a**  
THF/TEOF (2:1), 4 h, rt  
2. 500 equiv. **20**  
**100 equiv. (R)-(-)-BNDHP A**  
THF, 18 h, 50 °C

=> conversion 94 %

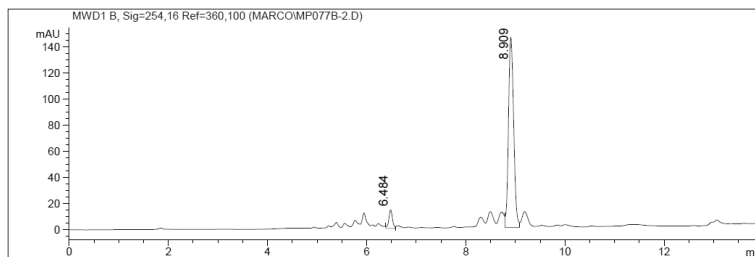

- 7 1. 500 equiv. **12a**  
THF/TEOF (2:1), 4 h, rt  
2. 500 equiv. **20**  
THF, 18 h, 50 °C

=> conversion 34 %

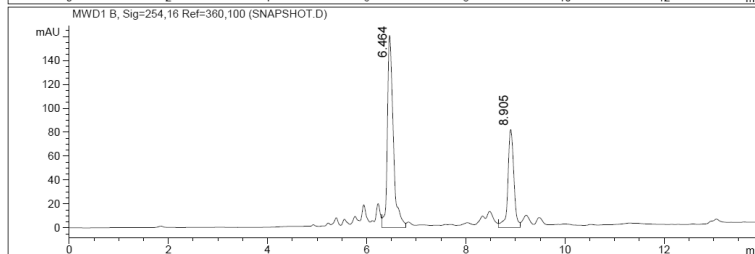

- 8 1. **1000** equiv. **12a**  
THF/TEOF (2:1), 4 h, rt  
2. 500 equiv. **20**  
50 equiv. (R)-(-)-BNDHP A  
THF, 18 h, 50 °C

=> conversion 55 %

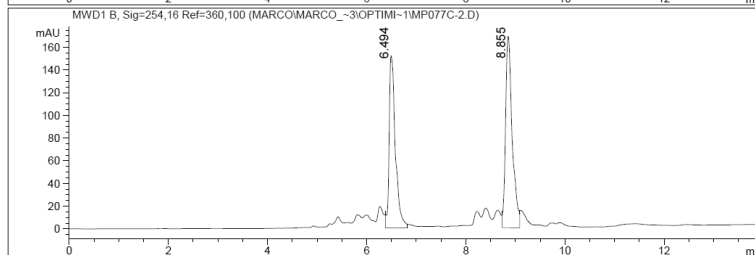

- 9 1. **2000** equiv. **12a**  
THF/TEOF (2:1), 4 h, rt  
2. 500 equiv. **20**  
50 equiv. (R)-(-)-BNDHP A  
THF, 18 h, 50 °C

=> conversion 11 %

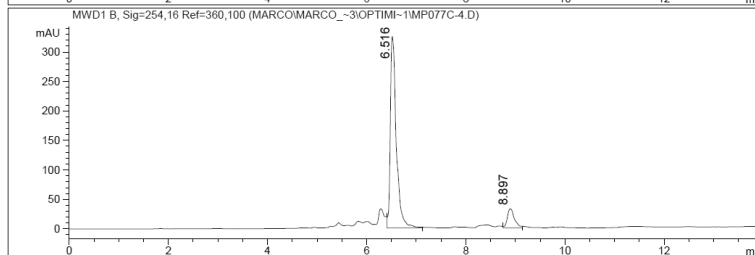

- 10 1. **4000** equiv. **12a**  
THF/TEOF (2:1), 4 h, rt  
2. 500 equiv. **20**  
50 equiv. (R)-(-)-BNDHP A  
THF, 18 h, 50 °C

=> conversion 7 %

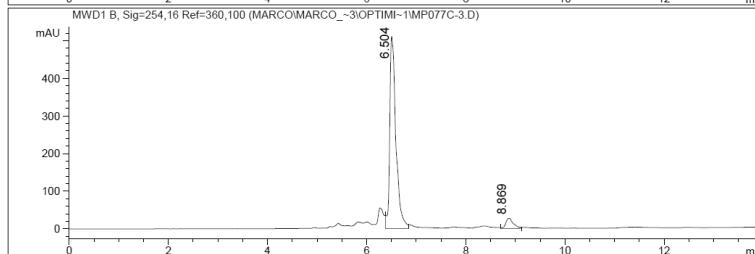

- 11 1. 500 equiv. **12a**  
THF/TEOF (2:1), 4 h, rt  
2. **1000** equiv. **20**  
50 equiv. (R)-(-)-BNDHP A  
THF, 18 h, 50 °C

=> conversion 63 %

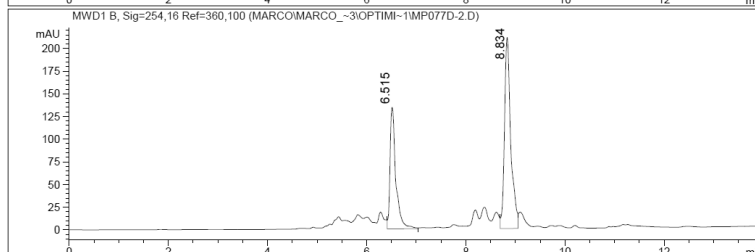

- 12 1. 500 equiv. **12a**  
THF/TEOF (2:1), 4 h, rt  
2. **2000** equiv. **20**  
50 equiv. (R)-(-)-BNDHP A  
THF, 18 h, 50 °C

=> conversion 67 %

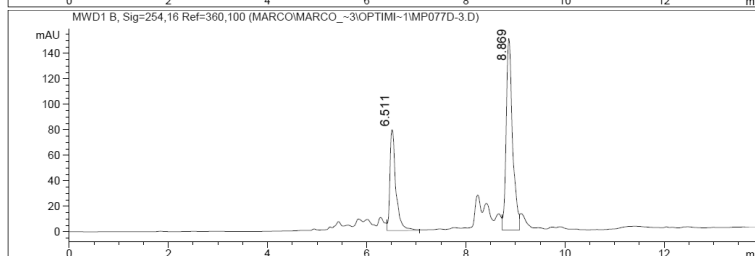

- 13 1. 500 equiv. **12a**  
THF/TEOF (2:1), 4 h, rt  
2. **4000** equiv. **20**  
50 equiv. (*R*)-(-)-BNDHP **A**  
THF, 18 h, 50 °C  
  
=> conversion 86 %

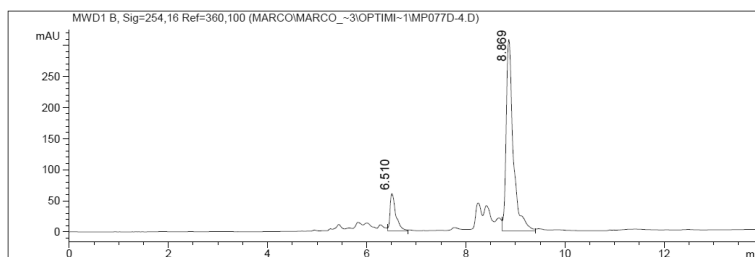

- 14 1. 500 equiv. **12a**  
**EtOH**/TEOF (2:1), 4 h, rt  
2. 500 equiv. **20**  
50 equiv. (*R*)-(-)-BNDHP **A**  
**EtOH**, 18 h, 50 °C  
  
=> conversion > 95 %

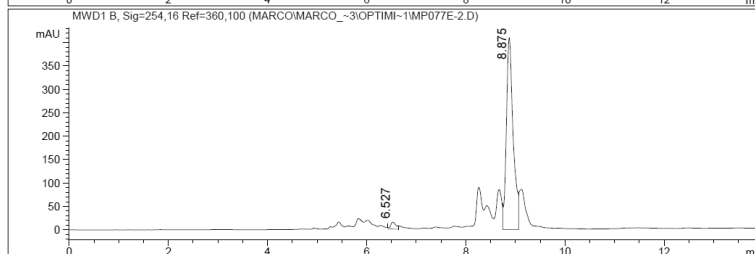

- 15 1. 500 equiv. **12a**  
**DMF**/TEOF (2:1), 4 h, rt  
2. 500 equiv. **20**  
50 equiv. (*R*)-(-)-BNDHP **A**  
**DMF**, 18 h, 50 °C  
  
=> conversion 50 %

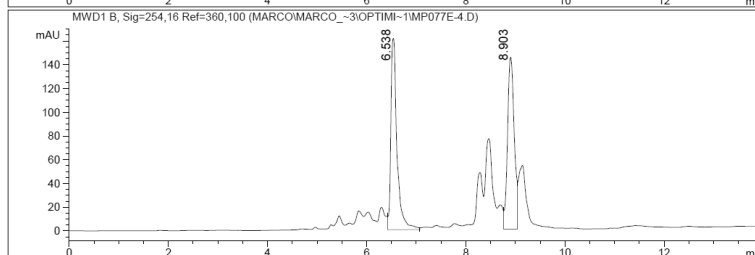

- 17 1. 500 equiv. **12a**  
THF/TEOF (2:1), 4 h, rt  
2. 500 equiv. **20**  
50 equiv. (*R*)-(-)-BNDHP **A**  
THF, 18 h, 50 °C  
3. 10% TFA, 4 h, rt  
  
=> conversion 82 %

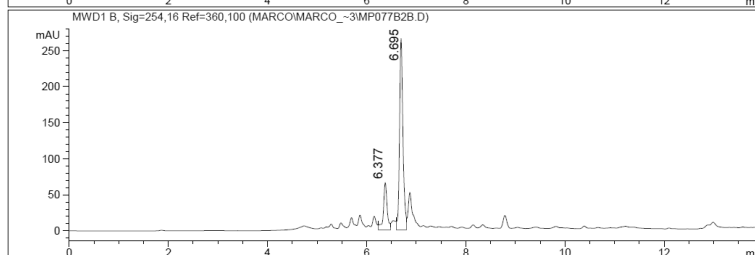

- 18  
  
hexT-tetrahydroquinoline conjugate  
**22**

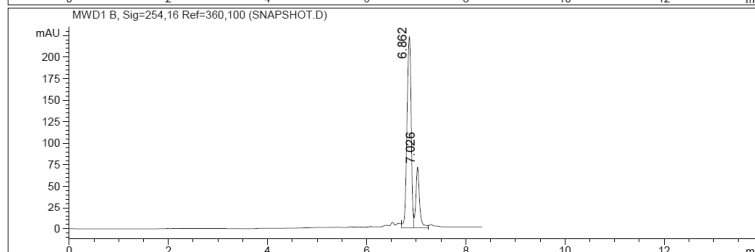

<sup>a</sup> Condensation of CPG-coupled hexT conjugate **11a** (20 nmol) with aniline **12a** (X equiv.) in 36  $\mu$ L of indicated solvent/triethyl orthoformate (2:1) at ambient temperature for 4 h, then (*R*)-(-)-BNDHP **A** (X equiv.) dissolved in 30  $\mu$ L of indicated solvent and *N*-Boc-2,3-dihydro-1H-pyrrole **20** (X equiv.) were added, the reaction mixture was shaken at indicated temperature for 16 h. <sup>b</sup> parameters that were changed are in bold and italic. <sup>c</sup> Analytical RP-HPLC, Method-III. TEOF = triethyl orthoformate.

**Table S10** – Scope of (*R*)-(-)-BNDHP-mediated Povarov reaction on CPG-coupled 10mer ATGC oligonucleotide-aldehyde conjugate.<sup>a</sup>

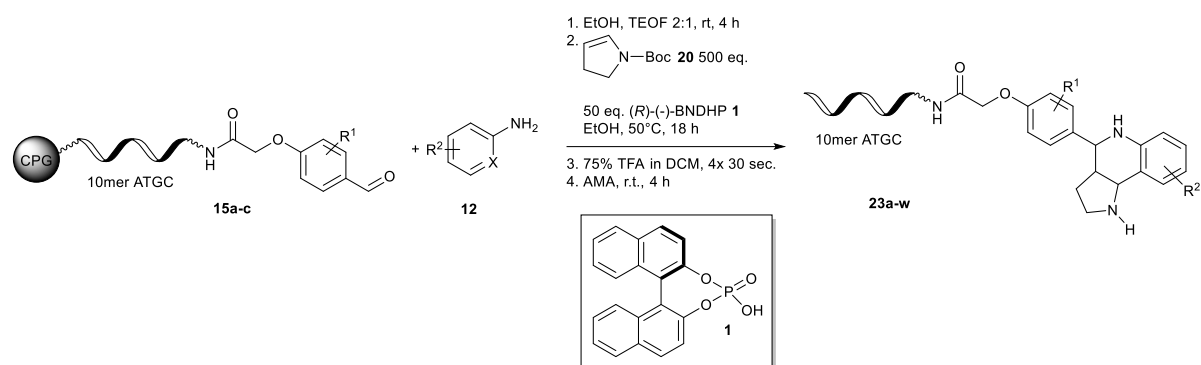

| Entry | Product | DNA-aldehyde conjugate | Amine | Conversion [%] <sup>b</sup> | Mass <sub>calc.</sub><br>Mass <sub>found</sub> <sup>c</sup> |
|-------|---------|------------------------|-------|-----------------------------|-------------------------------------------------------------|
| 1     | 23a     |                        |       | 91                          | 3503.5<br>3502.8                                            |
| 2     | 23b     |                        |       | 57                          | 3582.4<br>3583.4                                            |
| 3     | 23c     |                        |       | > 95                        | 3582.4<br>3582.3                                            |
| 4     | 23d     |                        |       | 84                          | 3521.5<br>3522.6 (Dia1)<br>3522.9 (Dia2)                    |
| 5     | 23e     |                        |       | 90                          | 3521.5<br>3522.8                                            |
| 6     | 23f     |                        |       | 86                          | 3539.5<br>3540.7                                            |
| 7     | 23g     |                        |       | 83                          | 3571.5<br>3572.8                                            |
| 8     | 23h     |                        |       | 70                          | 3547.6<br>3548.2                                            |
| 9     | 23i     |                        |       | 58                          | 3519.5<br>3518.6                                            |
| 10    | 23j     |                        |       | 87                          | 3531.6<br>3531.6                                            |
| 11    | 23k     |                        |       | 92                          | 3531.6<br>3533.0                                            |

|    |     |                                                                                     |                                                                                     |     |                  |
|----|-----|-------------------------------------------------------------------------------------|-------------------------------------------------------------------------------------|-----|------------------|
| 12 | 23l | 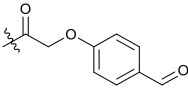   |    | 39  | 3531.6<br>3532.7 |
| 13 | 23m |    |    | < 5 | 3559.7<br>n.d.   |
| 14 | 23n |    |    | 82  | 3563.6<br>3564.5 |
| 15 | 23o |    |    | 86  | 3563.6<br>3561.7 |
| 16 | 23p |    |    | 94  | 3527.6<br>3527.9 |
| 17 | 23q |    |    | >95 | 3571.6<br>3573.3 |
| 18 | 23r |   |   | 75  | 3533.6<br>3534.3 |
| 19 | 23s |  |  | 25  | 3593.7<br>3591.4 |
| 20 | 23t |  |  | < 5 | 3504.5<br>n.d.   |
| 21 | 23u |  |  | < 5 | 3505.5<br>n.d.   |
| 22 | 23v |  |  | 93  | 3538.0<br>3537.6 |
| 23 | 23w |  |  | < 5 | 3553.6<br>n.d.   |

<sup>a</sup> Condensation of CPG-coupled oligonucleotide conjugate **15** (20 nmol) with aniline **12** (500 equiv., 10  $\mu$ mol) in 36  $\mu$ L ethanol/triethyl orthoformate (2:1) at ambient temperature for 4 h, then addition of (*R*)-(-)-BNDHP **A** (50 equiv., 1  $\mu$ mol) dissolved in 30  $\mu$ L ethanol and *N*-Boc-2,3-dihydro-1H-pyrrole **20** (500 equiv., 10  $\mu$ mol) at 50  $^{\circ}$ C for 16 h. 75% TFA in dichloromethane 4x 30 seconds at ambient temperature. DNA cleavage AMA (30 % aqueous ammonia / 40 % aqueous methylamine, 1:1 (vol/vol)) at ambient temperature for 4 h.

<sup>b</sup> Determined by analytical RP-HPLC analysis. <sup>c</sup> Measured by MALDI-MS. 10mer ATGC = 5'-GTC ATG ATC T-3'. n.d. = not detected.

## Products of Povarov reaction on CPG-coupled oligonucleotide-aldehyde conjugate

**DNA conjugate 22:** CPG-coupled hexT-aldehyde conjugate **11** was reacted with aniline **12a** and *N*-Boc-2,3-dihydro-1H-pyrrole **20** according to RP-09.

### HPLC trace of crude reaction mixture 22 (Analytical RP-HPLC, Method-III)

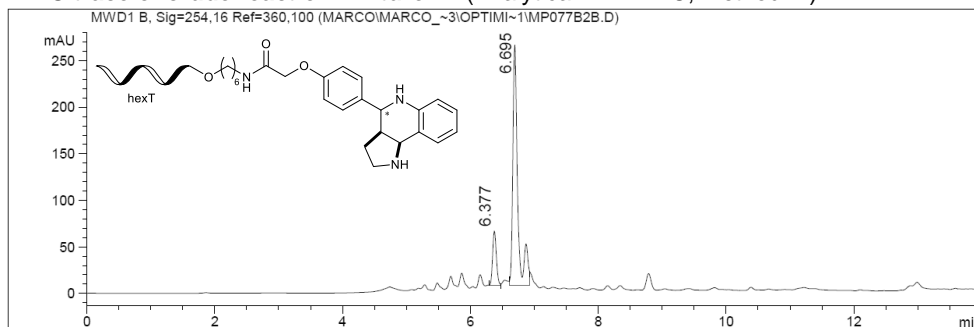

Peak list:

| Ret. Time | Width min | Height  | Area     | Area % |
|-----------|-----------|---------|----------|--------|
| 6.377     | 0.068     | 58.738  | 239.068  | 14.781 |
| 6.695     | 0.089     | 259.027 | 1378.315 | 85.219 |

### HPLC trace of isolated product 22 (Analytical RP-HPLC, Method-III)

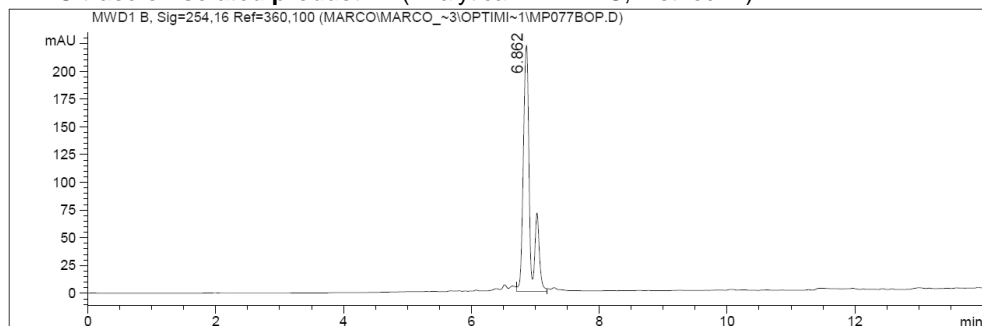

Peak list:

| Ret. Time | Width min | Height  | Area     | Area %  |
|-----------|-----------|---------|----------|---------|
| 6.862     | 0.123     | 222.063 | 1633.396 | 100.000 |

### MALDI-MS spectrum of crude reaction mixture 22

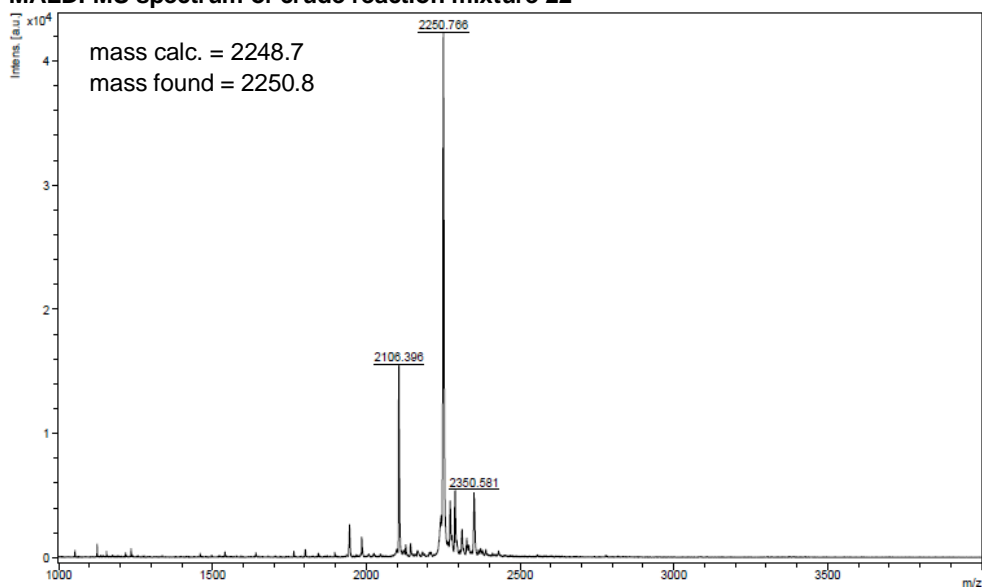



**DNA conjugate 23a:** CPG-coupled 10mer ATGC-aldehyde conjugate **15a** was reacted with aniline **12a** and *N*-Boc-2,3-dihydro-1H-pyrrole **20** according to RP-09.

**HPLC trace of crude reaction mixture 23a-Boc<sub>on</sub>** (Analytical RP-HPLC, Method-II)

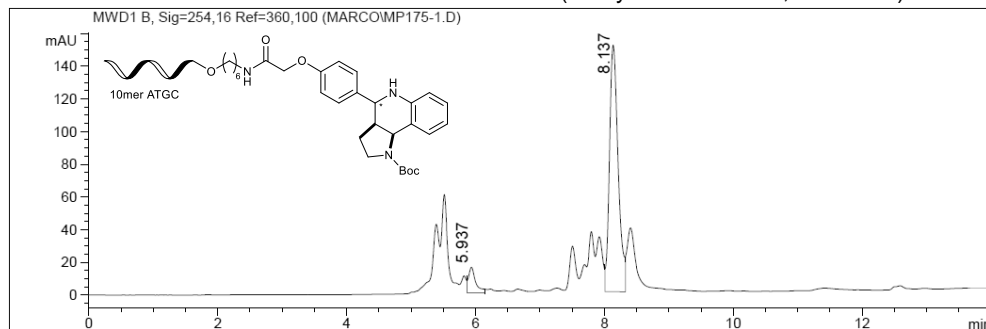

Peak list:

| Ret. Time | Width min | Height  | Area     | Area % |
|-----------|-----------|---------|----------|--------|
| 5.937     | 0.127     | 15.722  | 119.679  | 7.863  |
| 8.137     | 0.155     | 150.913 | 1402.450 | 92.137 |

**MALDI-MS spectrum of crude reaction mixture 23a-Boc<sub>on</sub>**

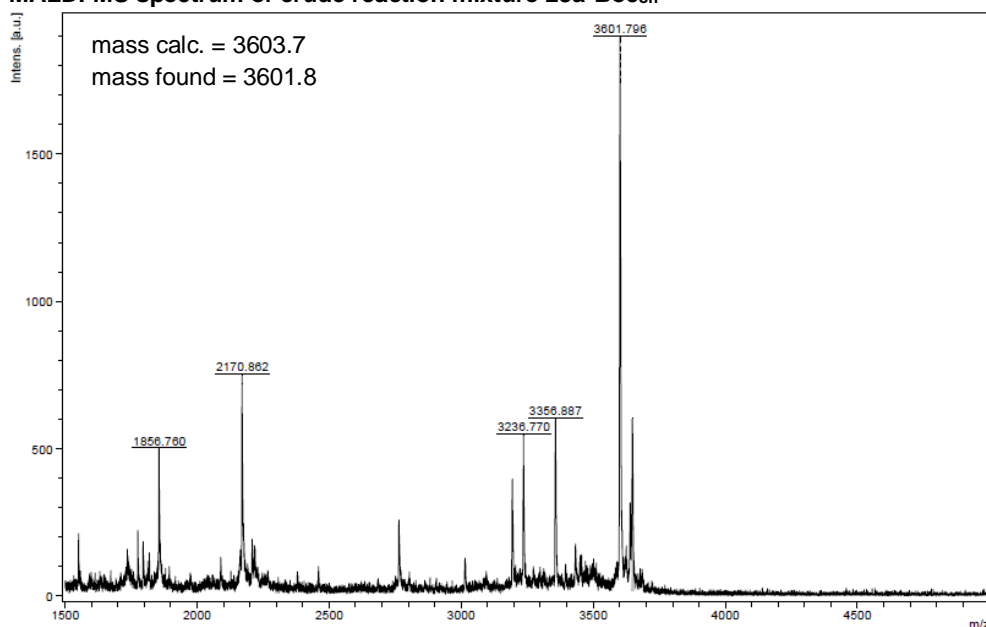

### HPLC trace of crude reaction mixture 23a (Analytical RP-HPLC, Method-II)

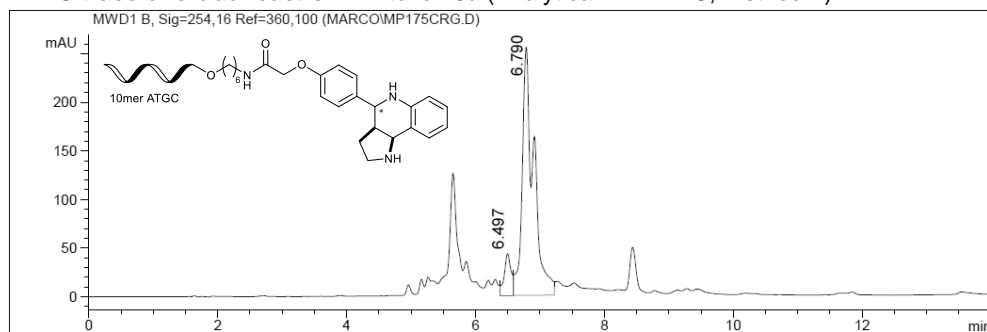

Peak list:

| Ret. Time | Width min | Height  | Area     | Area % |
|-----------|-----------|---------|----------|--------|
| 6.497     | 0.125     | 43.055  | 321.970  | 9.172  |
| 6.790     | 0.208     | 255.855 | 3188.387 | 90.828 |

### HPLC trace of isolated product 23a (Analytical RP-HPLC, Method-II)

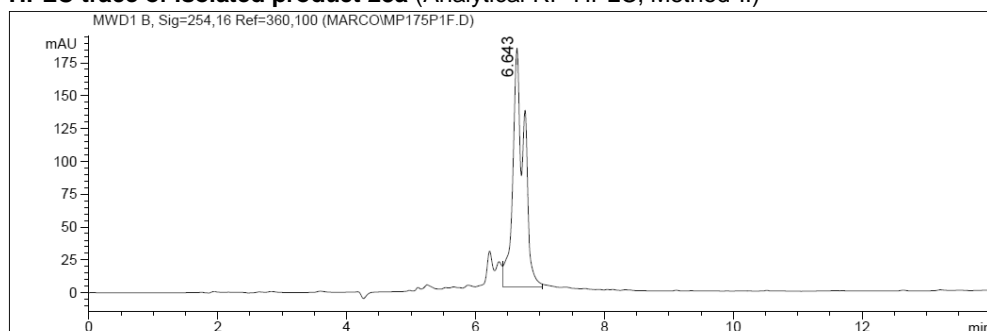

Peak list:

| Ret. Time | Width min | Height  | Area     | Area %  |
|-----------|-----------|---------|----------|---------|
| 6.643     | 0.204     | 182.113 | 2225.986 | 100.000 |

### MALDI-MS spectrum of isolated product 23a

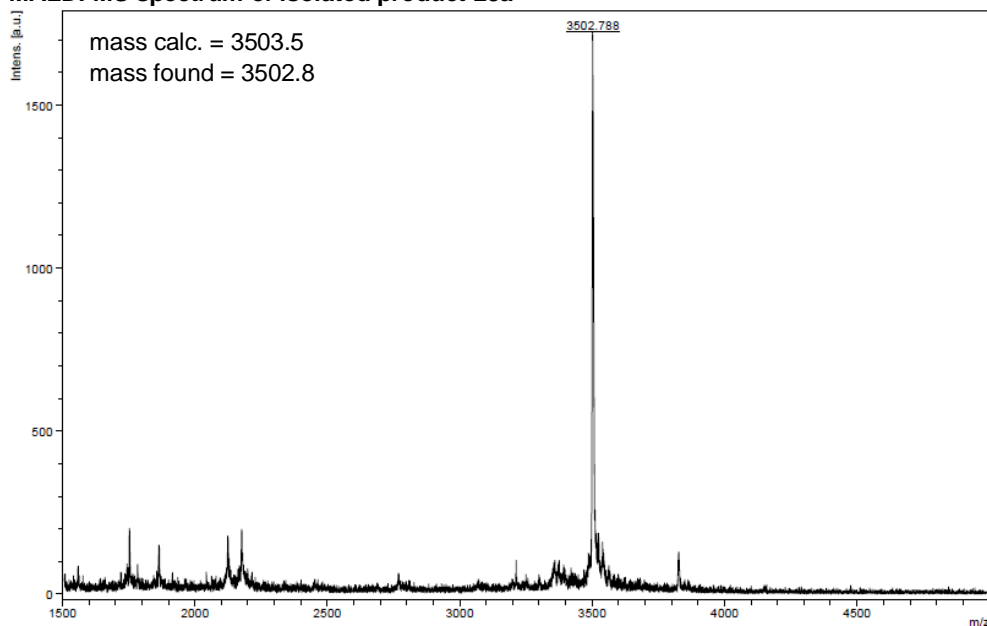

**DNA conjugate 23b:** CPG-coupled 10mer ATGC-aldehyde conjugate **15a** was reacted with 2-bromoaniline **12i** and *N*-Boc-2,3-dihydro-1H-pyrrole **20** according to RP-09.

**HPLC trace of crude reaction mixture 23b (Analytical RP-HPLC, Method-II)**

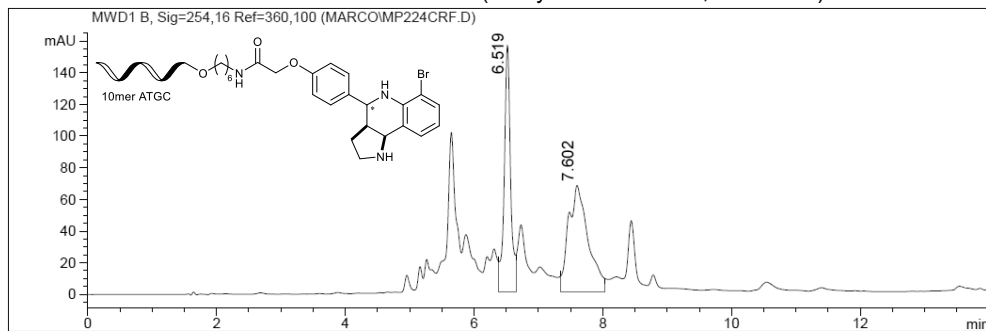

Peak list:

| Ret. Time | Width min | Height  | Area     | Area % |
|-----------|-----------|---------|----------|--------|
| 6.519     | 0.112     | 155.924 | 1048.529 | 42.513 |
| 7.602     | 0.352     | 67.042  | 1417.842 | 57.487 |

**HPLC trace of isolated product 23b (Analytical RP-HPLC, Method-II)**

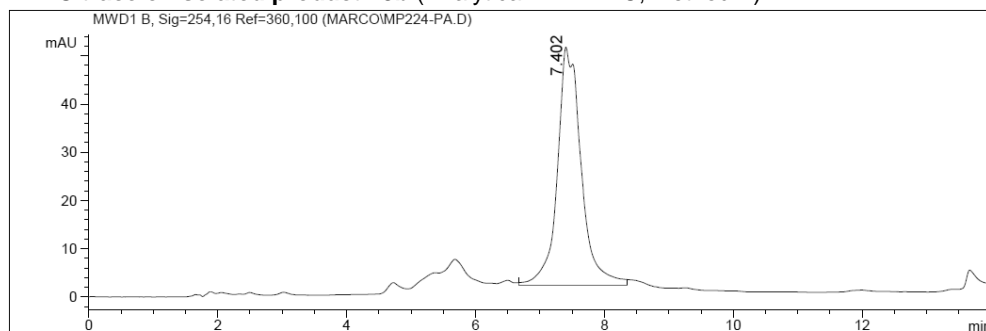

Peak list:

| Ret. Time | Width min | Height | Area     | Area %  |
|-----------|-----------|--------|----------|---------|
| 7.402     | 0.431     | 49.421 | 1277.357 | 100.000 |

**MALDI-MS spectrum of isolated product 23b**

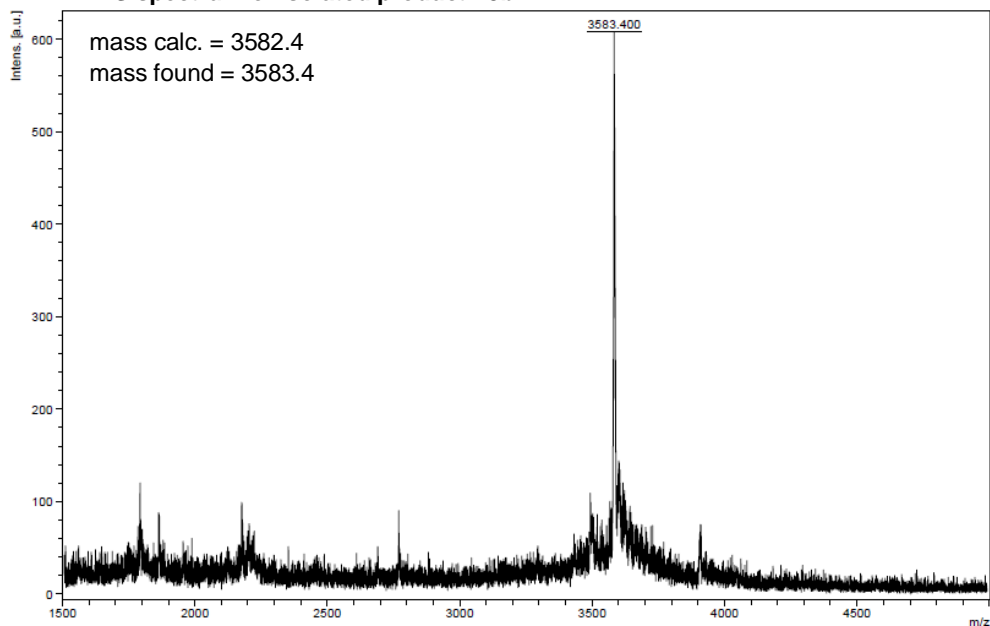

**DNA conjugate 23c:** CPG-coupled 10mer ATGC-aldehyde conjugate **15a** was reacted with 4-bromoaniline **12h** and *N*-Boc-2,3-dihydro-1H-pyrrole **20** according to RP-09.

**HPLC trace of crude reaction mixture 23c (Analytical RP-HPLC, Method-II)**

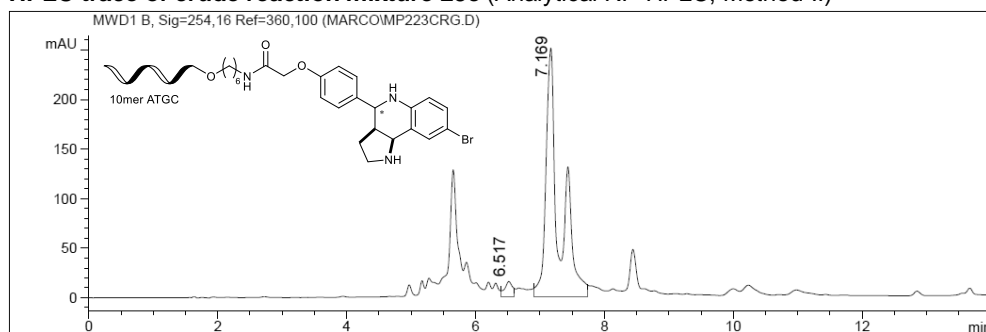

Peak list:

| Ret. Time | Width min | Height  | Area     | Area % |
|-----------|-----------|---------|----------|--------|
| 6.517     | 0.135     | 14.963  | 120.802  | 3.374  |
| 7.169     | 0.230     | 250.566 | 3459.788 | 96.626 |

**HPLC trace of isolated product 23c (Analytical RP-HPLC, Method-II)**

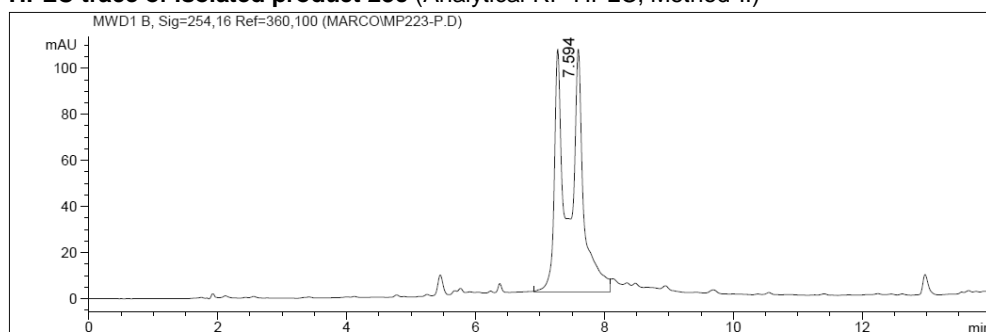

Peak list:

| Ret. Time | Width min | Height  | Area     | Area %  |
|-----------|-----------|---------|----------|---------|
| 7.594     | 0.326     | 105.461 | 2063.898 | 100.000 |

**MALDI-MS spectrum of isolated product 23c**

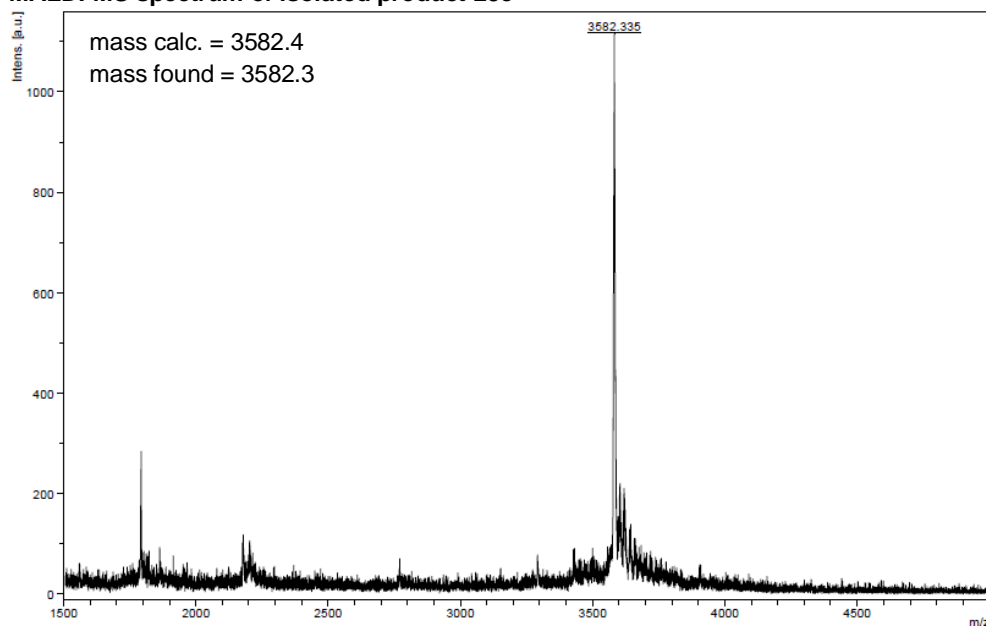

**DNA conjugate 23d:** CPG-coupled 10mer ATGC-aldehyde conjugate **15a** was reacted with 4-fluoroaniline **12e** and *N*-Boc-2,3-dihydro-1H-pyrrole **20** according to RP-09.

**HPLC trace of crude reaction mixture 23d (Analytical RP-HPLC, Method-II)**

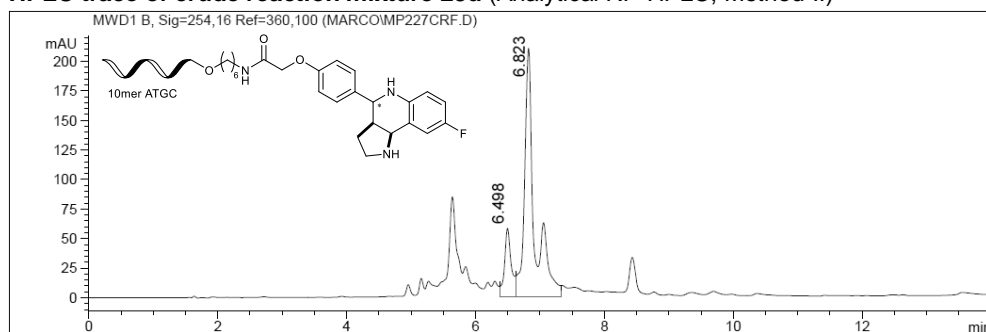

Peak list:

| Ret. Time | Width min | Height  | Area     | Area % |
|-----------|-----------|---------|----------|--------|
| 6.498     | 0.121     | 58.176  | 424.096  | 15.997 |
| 6.823     | 0.176     | 210.615 | 2227.069 | 84.003 |

**HPLC trace of isolated product 23d-dia1 (Analytical RP-HPLC, Method-II)**

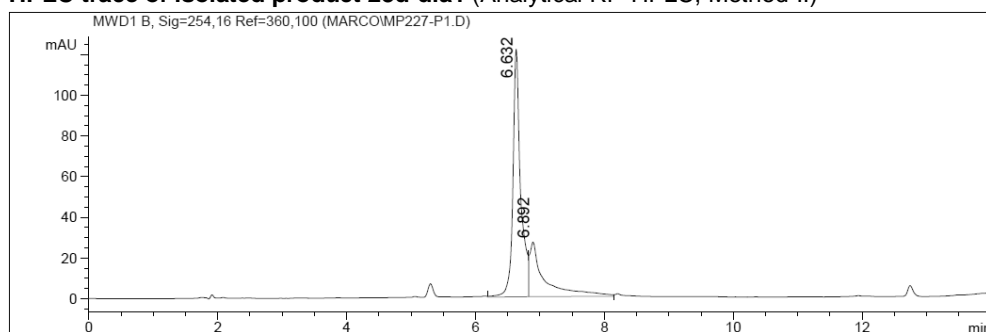

Peak list:

| Ret. Time | Width min | Height  | Area     | Area % |
|-----------|-----------|---------|----------|--------|
| 6.632     | 0.117     | 121.831 | 1014.094 | 69.760 |
| 6.892     | 0.211     | 26.848  | 439.587  | 30.240 |

**MALDI-MS spectrum of isolated product 23d-dia1**

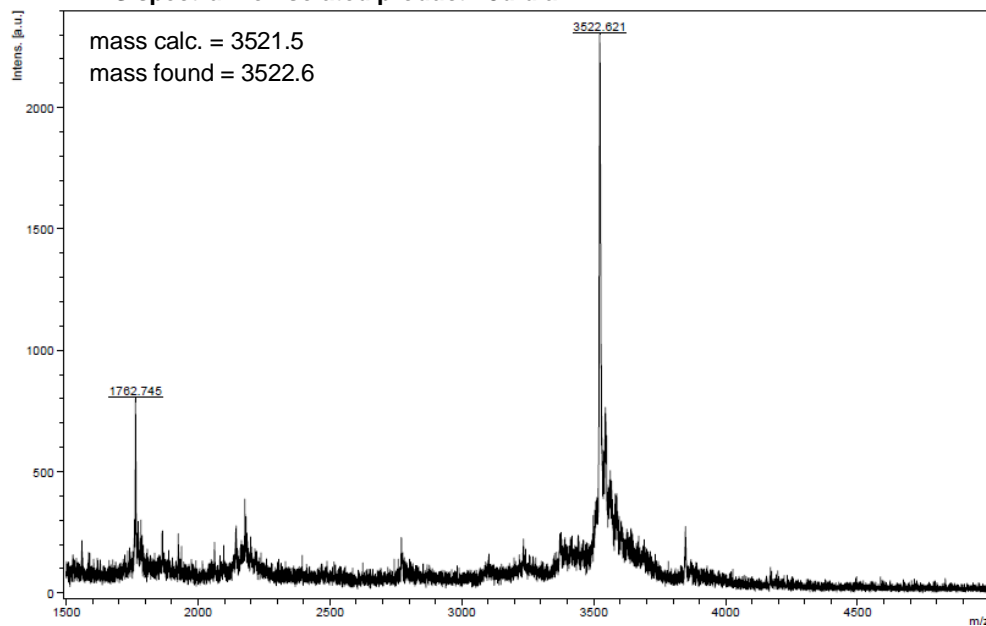

### HPLC trace of isolated product 23d-dia2 (Analytical RP-HPLC, Method-II)

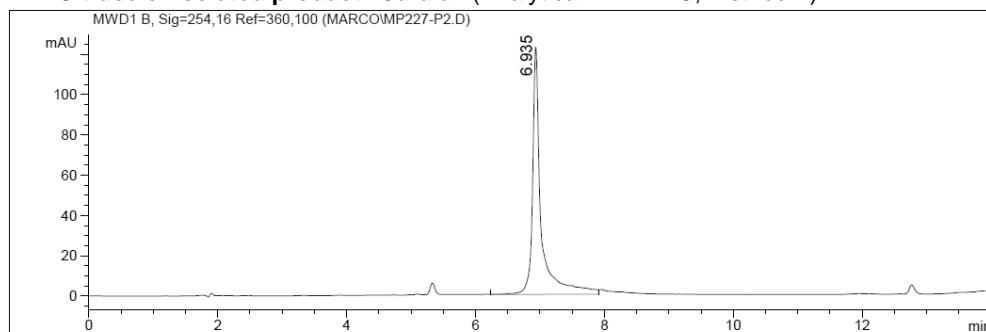

Peak list:

| Ret. Time | Width min | Height  | Area     | Area %  |
|-----------|-----------|---------|----------|---------|
| 6.935     | 0.130     | 122.672 | 1140.619 | 100.000 |

### MALDI-MS spectrum of isolated product 23d-dia2

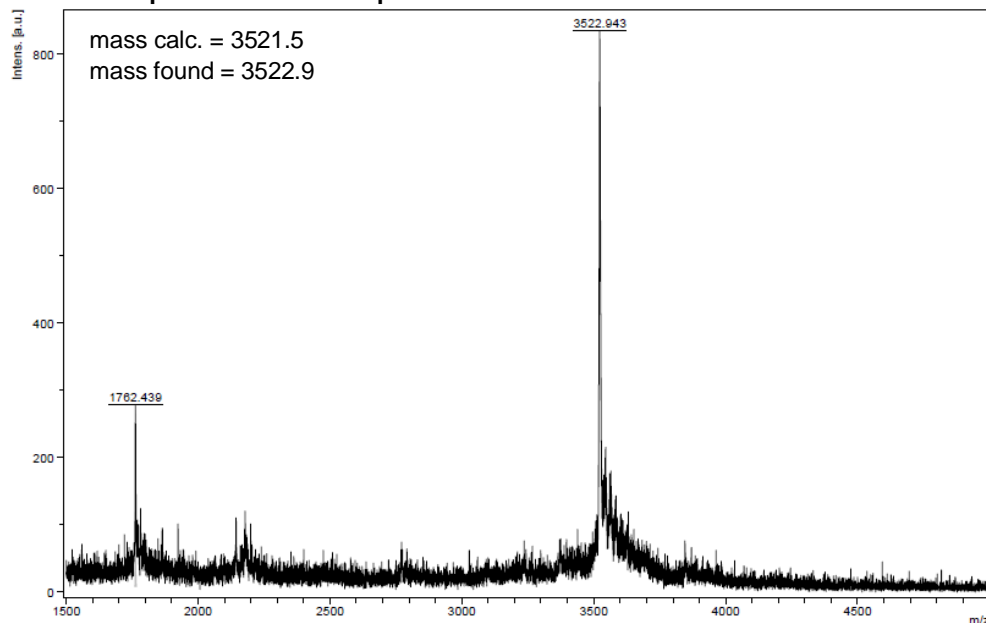

### HPLC trace of isolated product 23d-dia2 after treatment with AMA (Analytical RP-HPLC, Method-II)

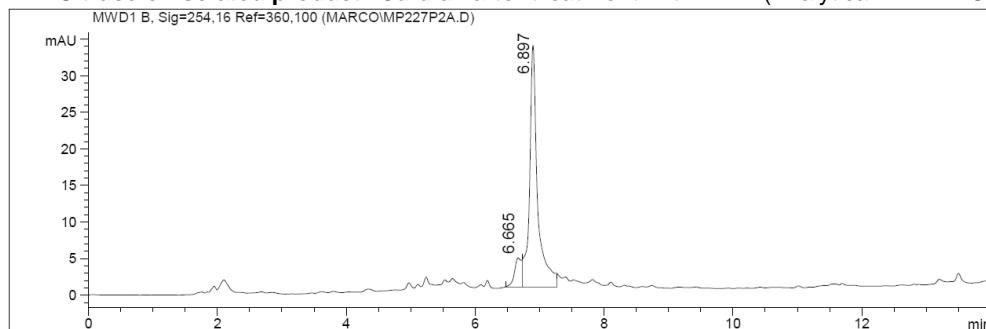

Peak list:

| Ret. Time | Width min | Height | Area    | Area % |
|-----------|-----------|--------|---------|--------|
| 6.665     | 0.138     | 3.993  | 32.941  | 10.336 |
| 6.897     | 0.144     | 33.125 | 285.757 | 89.664 |

**DNA conjugate 23e:** CPG-coupled 10mer ATGC-aldehyde conjugate **15a** was reacted with 3-fluoroaniline **12f** and *N*-Boc-2,3-dihydro-1H-pyrrole **20** according to RP-09.

**HPLC trace of crude reaction mixture 23e (Analytical RP-HPLC, Method-II)**

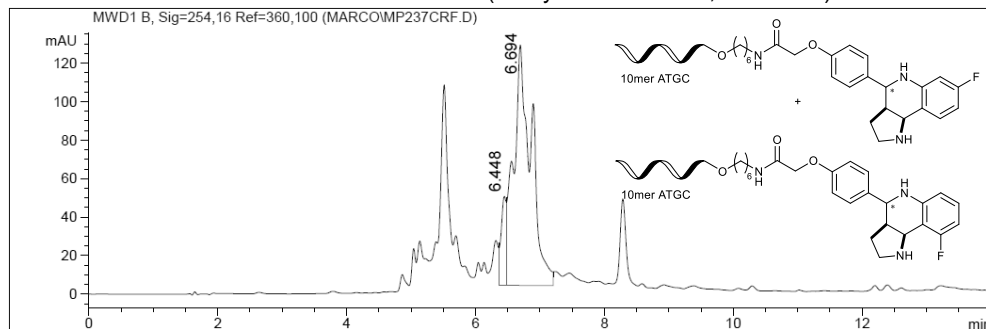

Peak list:

| Ret. Time | Width min | Height  | Area     | Area % |
|-----------|-----------|---------|----------|--------|
| 6.448     | 0.094     | 46.279  | 260.954  | 9.840  |
| 6.694     | 0.319     | 125.116 | 2391.062 | 90.160 |

**HPLC trace of isolated product 23e (Analytical RP-HPLC, Method-II)**

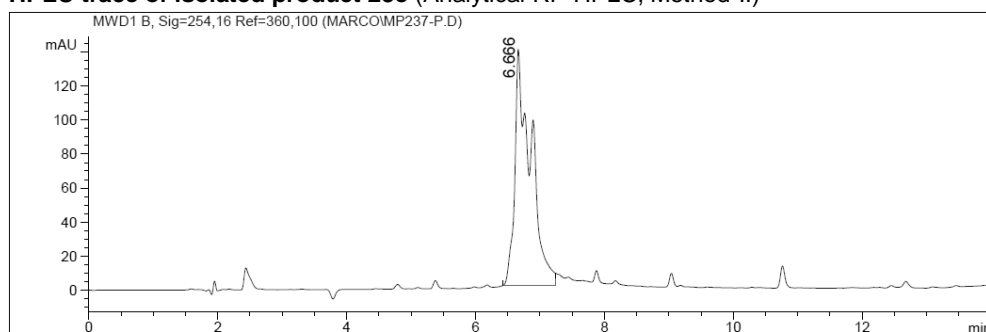

Peak list:

| Ret. Time | Width min | Height  | Area     | Area %  |
|-----------|-----------|---------|----------|---------|
| 6.666     | 0.289     | 138.906 | 2411.832 | 100.000 |

**MALDI-MS spectrum of isolated product 23e**

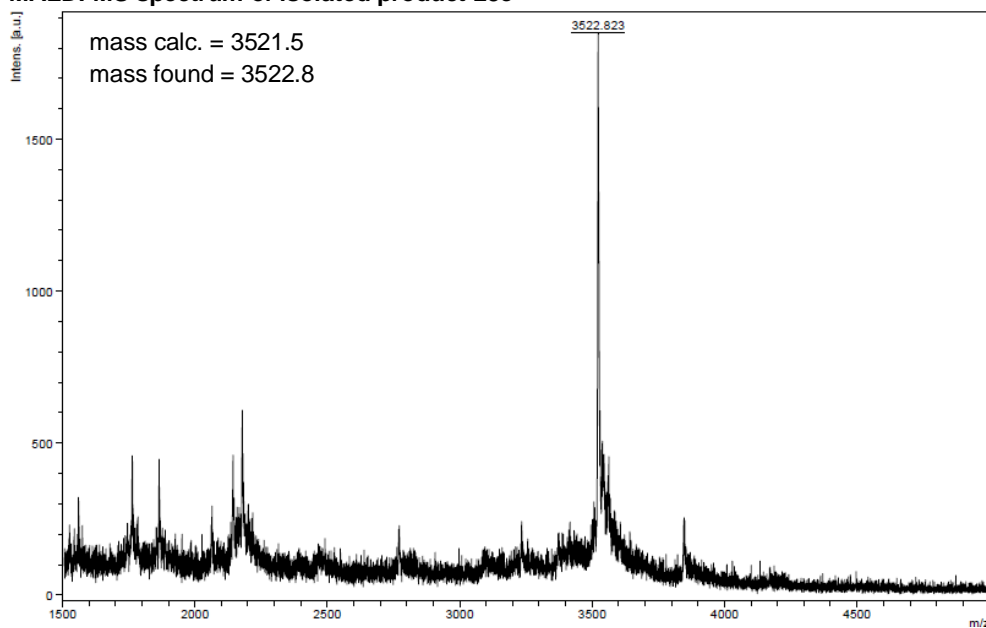

**DNA conjugate 23f:** CPG-coupled 10mer ATGC-aldehyde conjugate **15a** was reacted with 2,4-difluoroaniline **12g** and *N*-Boc-2,3-dihydro-1H-pyrrole **20** according to RP-09.

**HPLC trace of crude reaction mixture 23f (Analytical RP-HPLC, Method-II)**

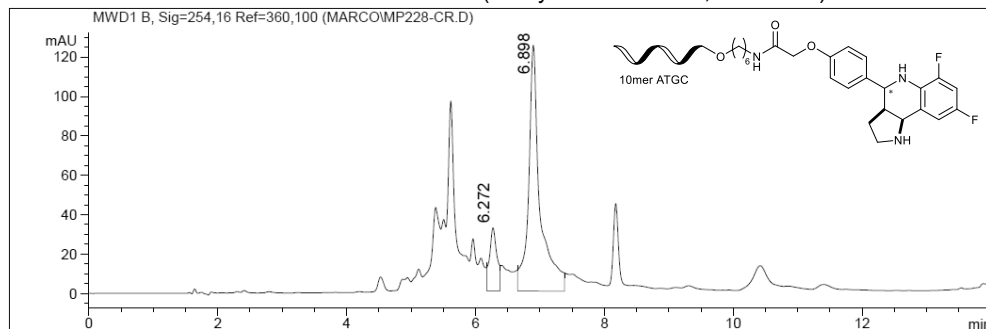

Peak list:

| Ret. Time | Width min | Height  | Area     | Area % |
|-----------|-----------|---------|----------|--------|
| 6.272     | 0.134     | 32.186  | 259.067  | 14.481 |
| 6.898     | 0.204     | 124.958 | 1529.998 | 85.519 |

**HPLC trace of isolated product 23f (Analytical RP-HPLC, Method-II)**

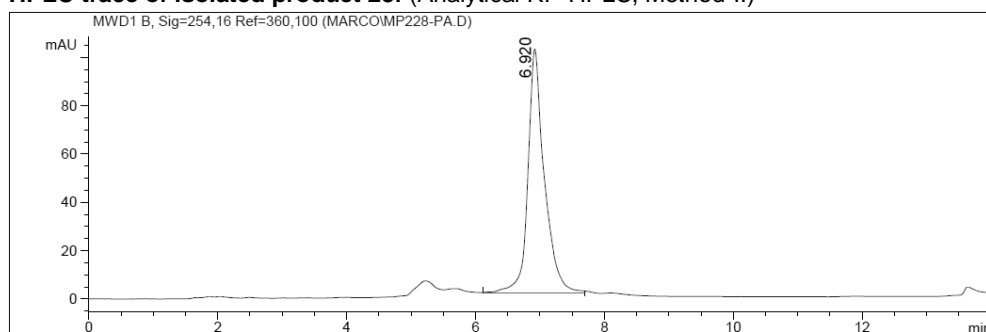

Peak list:

| Ret. Time | Width min | Height  | Area     | Area %  |
|-----------|-----------|---------|----------|---------|
| 6.920     | 0.295     | 100.973 | 1786.442 | 100.000 |

**MALDI-MS spectrum of isolated product 23f**

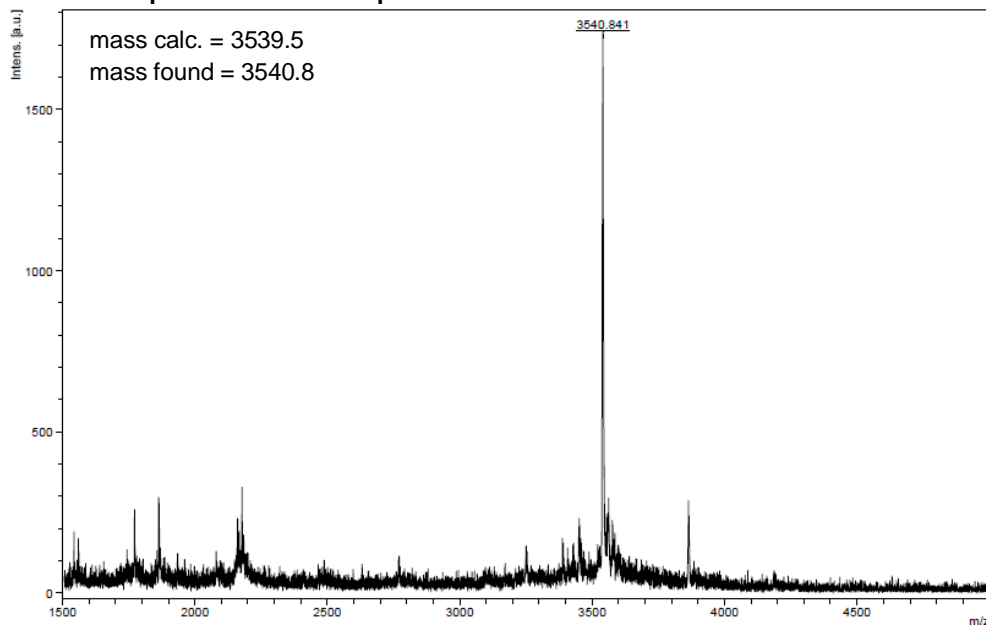



**DNA conjugate 23g:** CPG-coupled 10mer ATGC-aldehyde conjugate **15a** was reacted with 4-trifluoromethylaniline **12s** and *N*-Boc-2,3-dihydro-1H-pyrrole **20** according to RP-09.

**HPLC trace of crude reaction mixture 23g (Analytical RP-HPLC, Method-II)**

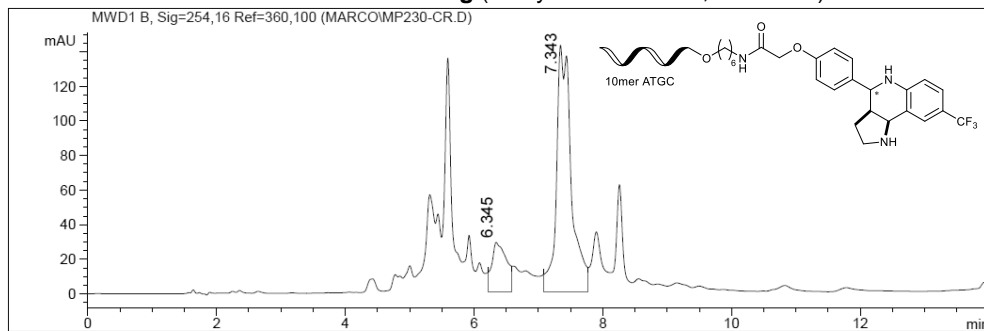

Peak list:

| Ret. Time | Width min | Height  | Area     | Area % |
|-----------|-----------|---------|----------|--------|
| 6.345     | 0.264     | 28.950  | 458.510  | 16.627 |
| 7.343     | 0.268     | 143.194 | 2299.069 | 83.373 |

**HPLC trace of isolated product 23g (Analytical RP-HPLC, Method-II)**

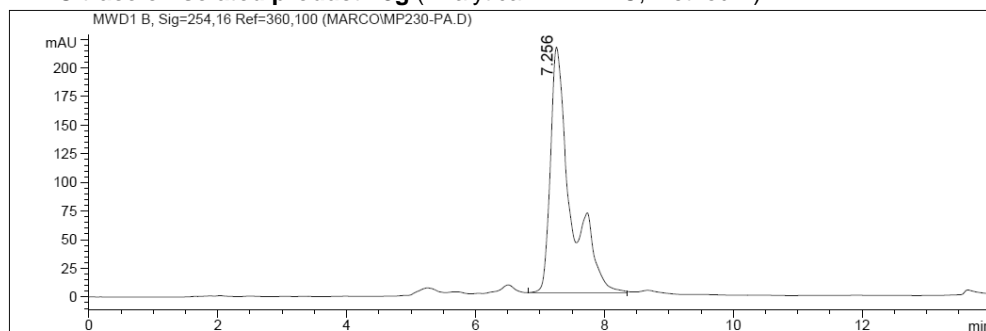

Peak list:

| Ret. Time | Width min | Height  | Area     | Area %  |
|-----------|-----------|---------|----------|---------|
| 7.256     | 0.366     | 214.644 | 4716.933 | 100.000 |

**MALDI-MS spectrum of isolated product 23g**

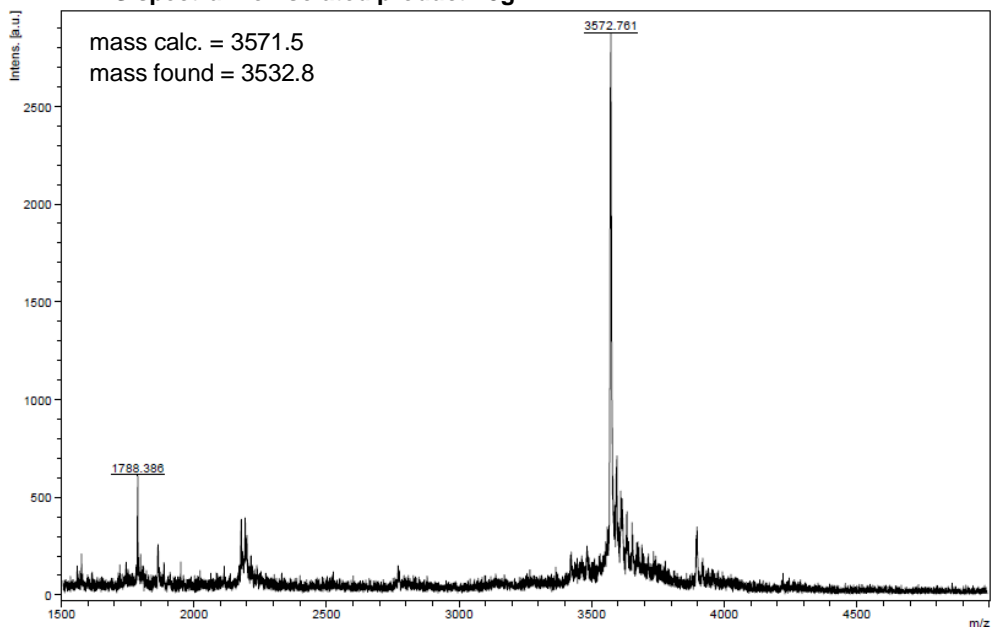

**DNA conjugate 23h:** CPG-coupled 10mer ATGC-aldehyde conjugate **15a** was reacted with 4-aminobenzoic acid **12t** and *N*-Boc-2,3-dihydro-1H-pyrrole **15a** according to RP-09.

**HPLC trace of crude reaction mixture 23h (Analytical RP-HPLC, Method-II)**

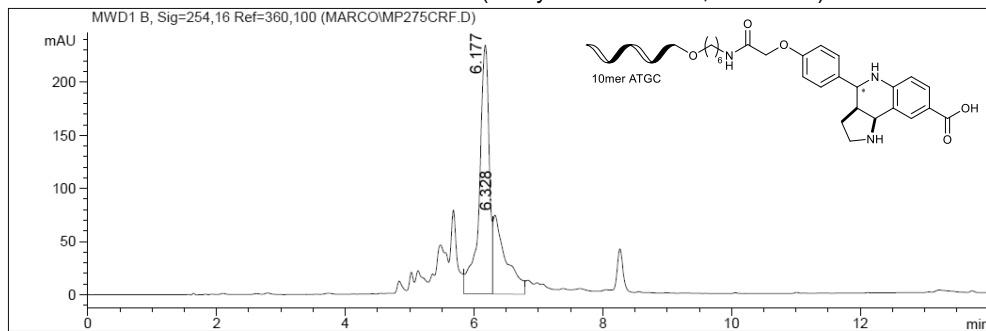

Peak list:

| Ret. Time | Width min | Height  | Area     | Area % |
|-----------|-----------|---------|----------|--------|
| 6.177     | 0.177     | 234.443 | 2494.980 | 70.214 |
| 6.328     | 0.238     | 74.245  | 1058.421 | 29.786 |

**HPLC trace of isolated product 23h (Analytical RP-HPLC, Method-II)**

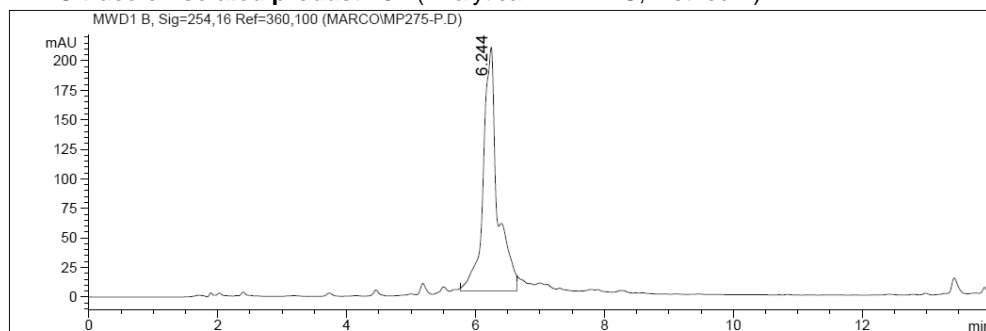

Peak list:

| Ret. Time | Width min | Height  | Area     | Area %  |
|-----------|-----------|---------|----------|---------|
| 6.244     | 0.255     | 206.604 | 3157.160 | 100.000 |

**MALDI-MS spectrum of isolated product 23h**

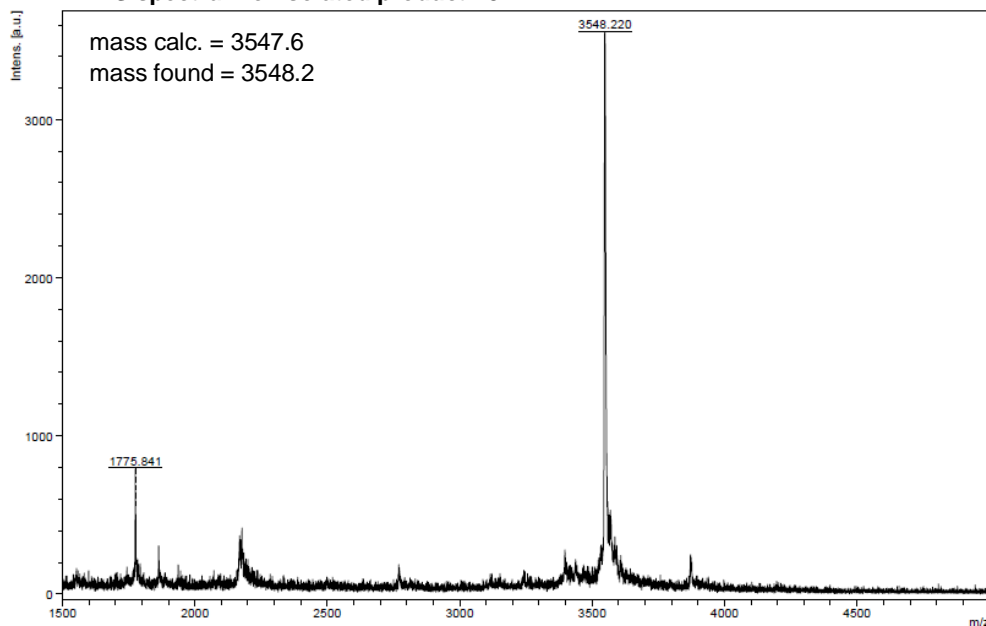

**DNA conjugate 23i:** CPG-coupled 10mer ATGC-aldehyde conjugate **15a** was reacted with 4-hydroxyaniline **12u** and *N*-Boc-2,3-dihydro-1H-pyrrole **20** according to RP-09.

**HPLC trace of crude reaction mixture 23i (Analytical RP-HPLC, Method-II)**

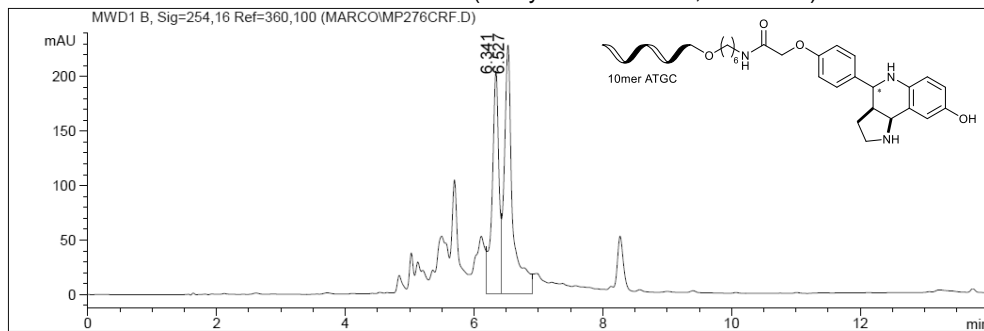

Peak list:

| Ret. Time | Width min | Height  | Area     | Area % |
|-----------|-----------|---------|----------|--------|
| 6.341     | 0.118     | 204.855 | 1456.078 | 41.891 |
| 6.527     | 0.147     | 228.536 | 2019.755 | 58.109 |

**HPLC trace of isolated product 23i (Analytical RP-HPLC, Method-II)**

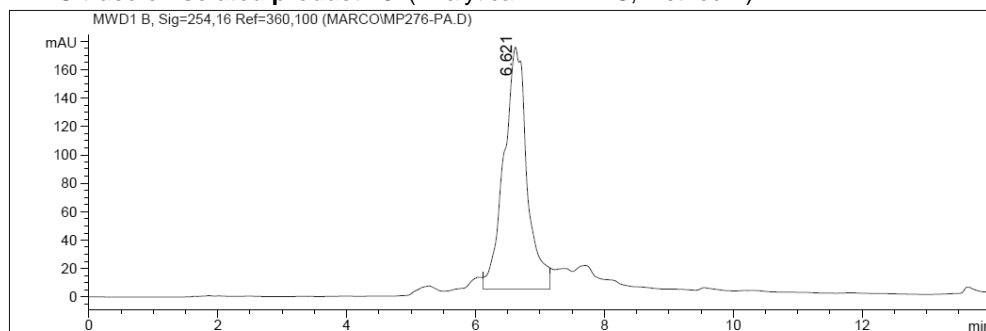

Peak list:

| Ret. Time | Width min | Height  | Area     | Area %  |
|-----------|-----------|---------|----------|---------|
| 6.621     | 0.416     | 170.139 | 4249.200 | 100.000 |

**MALDI-MS spectrum of isolated product 23i**

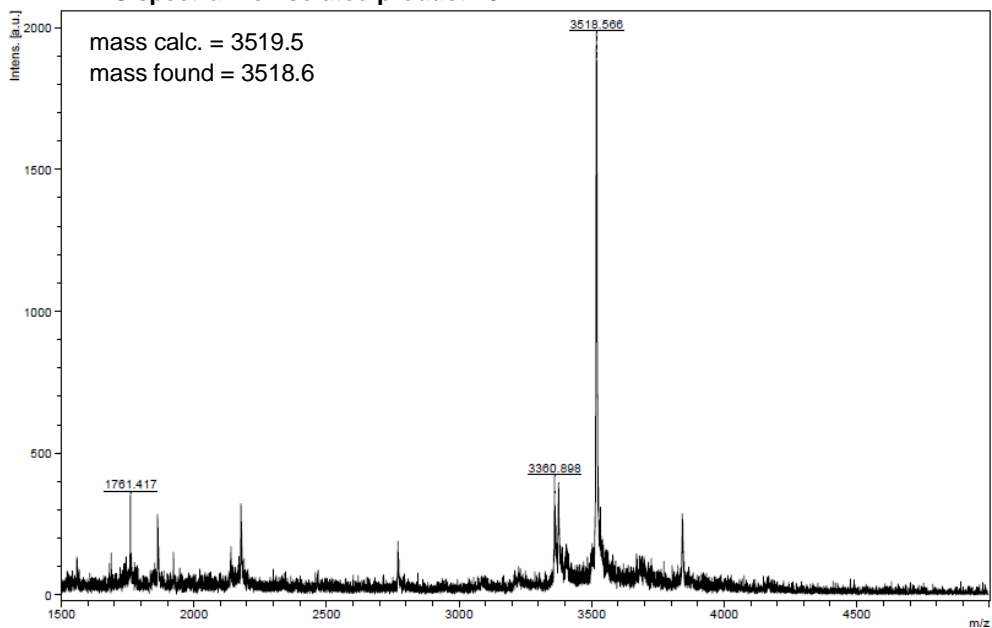

**DNA conjugate 23j:** CPG-coupled 10mer ATGC-aldehyde conjugate **15a** was reacted with 4-ethylaniline **12b** and *N*-Boc-2,3-dihydro-1H-pyrrole **20** according to RP-09.

**HPLC trace of crude reaction mixture 23j (Analytical RP-HPLC, Method-II)**

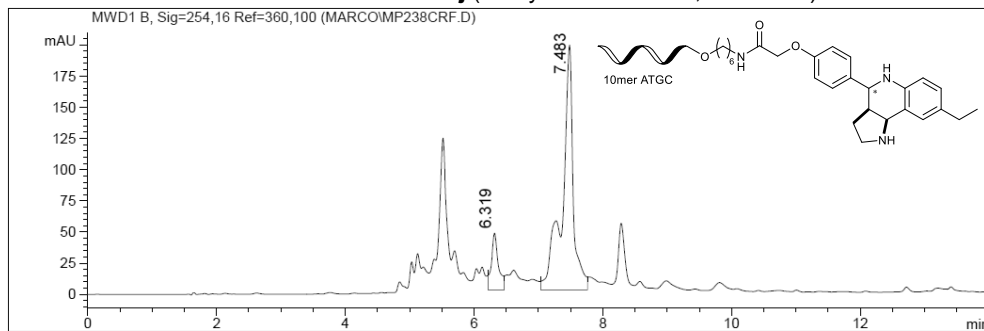

Peak list:

| Ret. Time | Width min | Height  | Area     | Area % |
|-----------|-----------|---------|----------|--------|
| 6.319     | 0.126     | 45.753  | 344.902  | 13.000 |
| 7.483     | 0.196     | 196.398 | 2308.146 | 87.000 |

**HPLC trace of isolated product 23j (Analytical RP-HPLC, Method-II)**

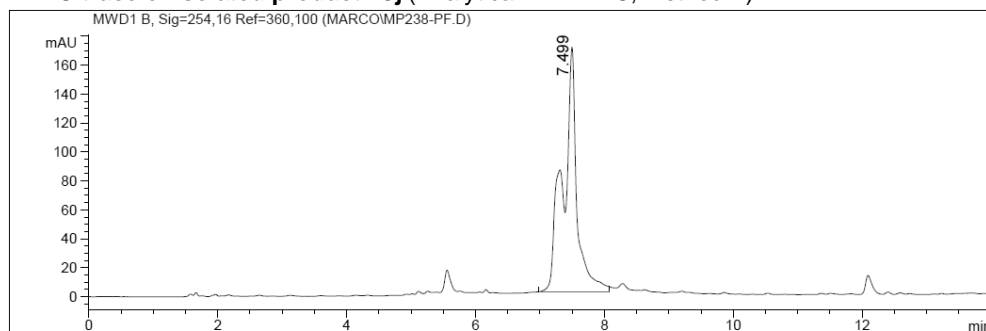

Peak list:

| Ret. Time | Width min | Height  | Area     | Area %  |
|-----------|-----------|---------|----------|---------|
| 7.499     | 0.248     | 169.478 | 2520.448 | 100.000 |

**MALDI-MS spectrum of isolated product 23j**

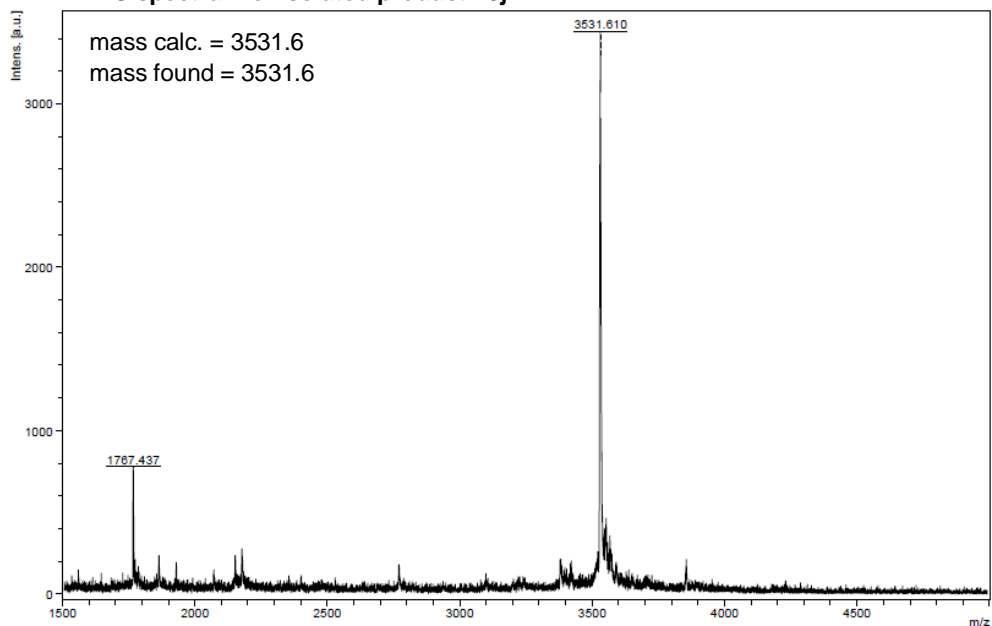

**DNA conjugate 23k:** CPG-coupled 10mer ATGC-aldehyde conjugate **15a** was reacted with 3-ethylaniline **12c** and *N*-Boc-2,3-dihydro-1H-pyrrole **20** according to RP-09.

**HPLC trace of crude reaction mixture 23k (Analytical RP-HPLC, Method-II)**

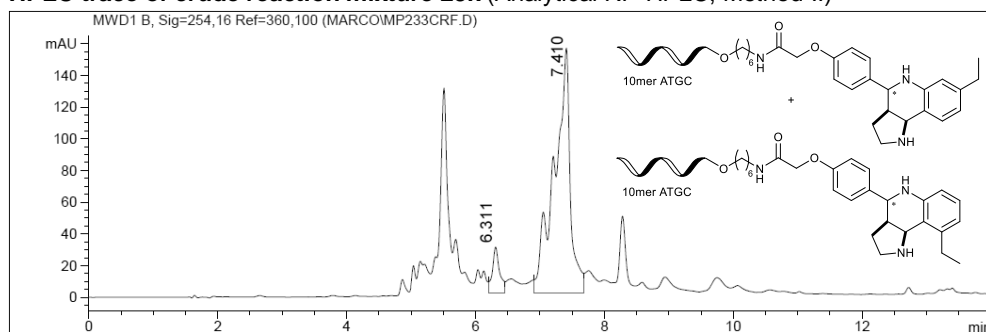

Peak list:

| Ret. Time | Width min | Height  | Area     | Area % |
|-----------|-----------|---------|----------|--------|
| 6.311     | 0.129     | 28.811  | 223.097  | 7.763  |
| 7.410     | 0.286     | 154.498 | 2650.679 | 92.237 |

**HPLC trace of isolated product 23k (Analytical RP-HPLC, Method-II)**

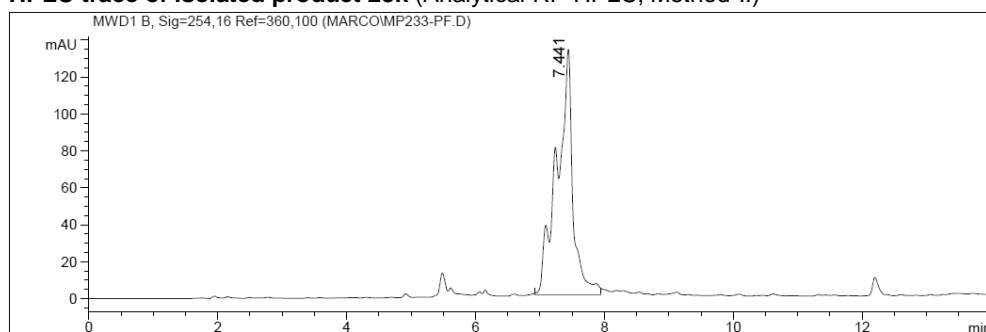

Peak list:

| Ret. Time | Width min | Height  | Area     | Area %  |
|-----------|-----------|---------|----------|---------|
| 7.441     | 0.286     | 133.129 | 2283.371 | 100.000 |

**MALDI-MS spectrum of isolated product 23k**

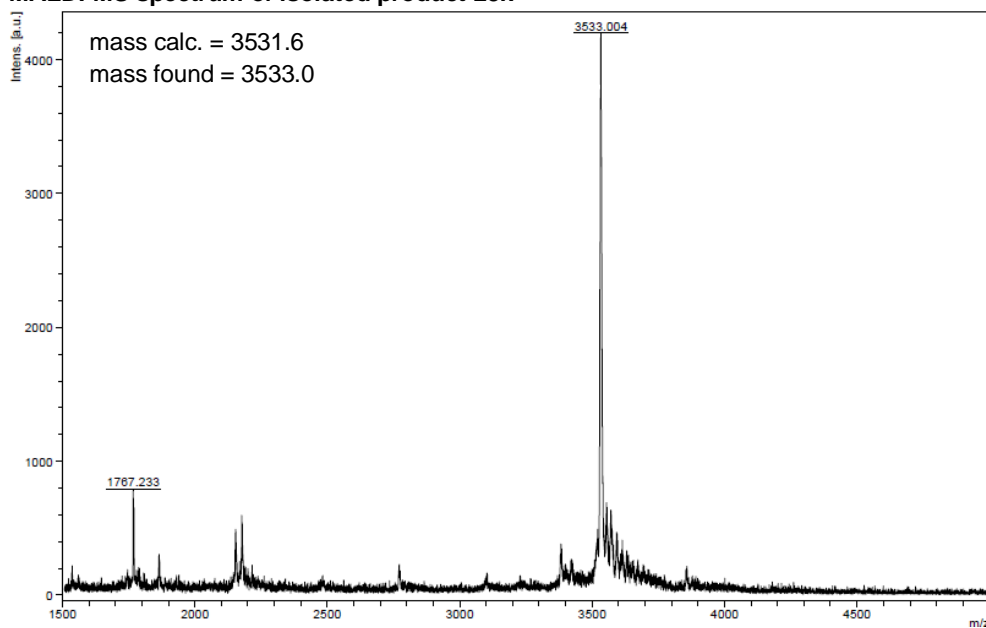

**DNA conjugate 23I:** CPG-coupled 10mer ATGC-aldehyde conjugate **15a** was reacted with 2-ethylaniline **12d** and *N*-Boc-2,3-dihydro-1H-pyrrole **20** according to RP-09.

**HPLC trace of crude reaction mixture 23I (Analytical RP-HPLC, Method-II)**

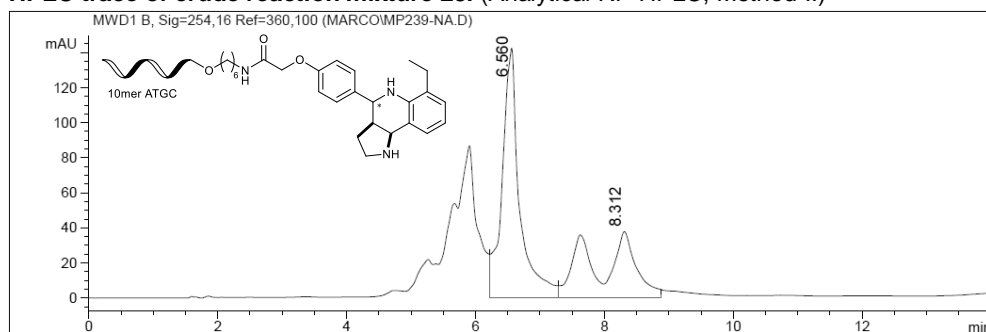

Peak list:

| Ret. Time | Width min | Height  | Area     | Area % |
|-----------|-----------|---------|----------|--------|
| 6.560     | 0.312     | 142.420 | 2666.813 | 61.419 |
| 8.312     | 0.740     | 37.744  | 1675.209 | 38.581 |

**HPLC trace of isolated product 23I (Analytical RP-HPLC, Method-II)**

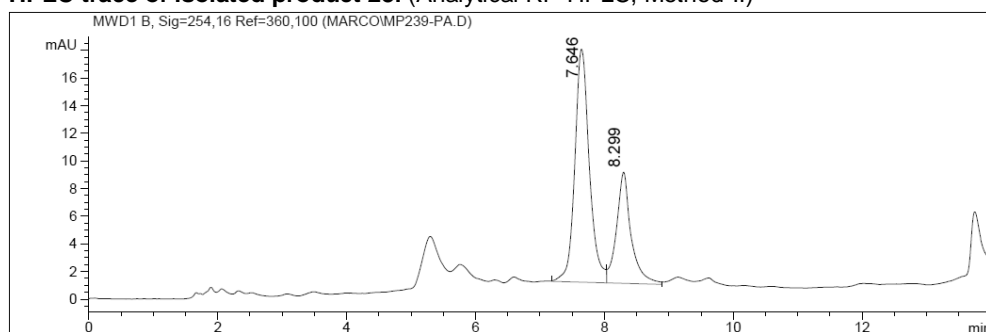

Peak list:

| Ret. Time | Width min | Height | Area    | Area % |
|-----------|-----------|--------|---------|--------|
| 7.646     | 0.233     | 16.867 | 263.930 | 67.652 |
| 8.299     | 0.221     | 8.049  | 126.196 | 32.348 |

**MALDI-MS spectrum of isolated product 23I**

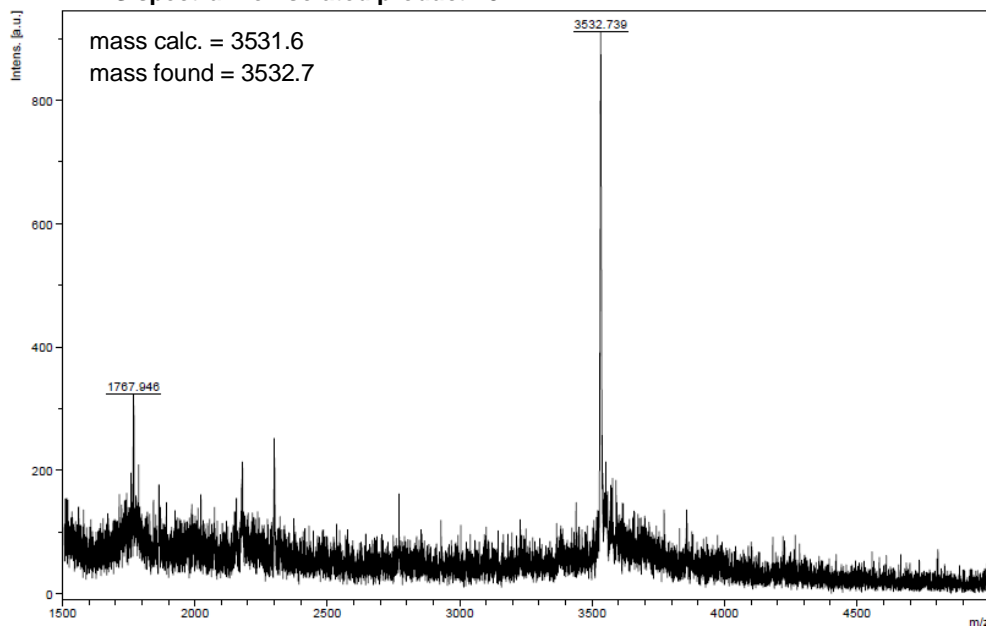

**DNA conjugate 23m:** CPG-coupled 10mer ATGC-aldehyde conjugate **15a** was reacted with 2-*tert* butylaniline **12k** and *N*-Boc-2,3-dihydro-1H-pyrrole **20** according to RP-09.

**HPLC trace of crude reaction mixture 23m (Analytical RP-HPLC, Method-II)**

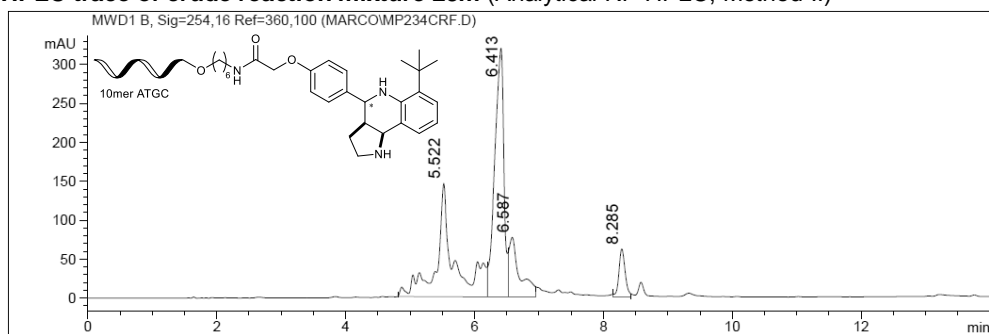

Peak list:

| Ret. Time | Width min | Height  | Area     | Area % |
|-----------|-----------|---------|----------|--------|
| 5.522     | 0.319     | 145.795 | 2793.278 | 38.528 |
| 6.413     | 0.164     | 320.226 | 3144.597 | 43.373 |
| 6.587     | 0.194     | 76.655  | 890.530  | 12.283 |
| 8.285     | 0.113     | 62.314  | 421.676  | 5.816  |

**MALDI-MS spectrum of crude reaction mixture 23m**

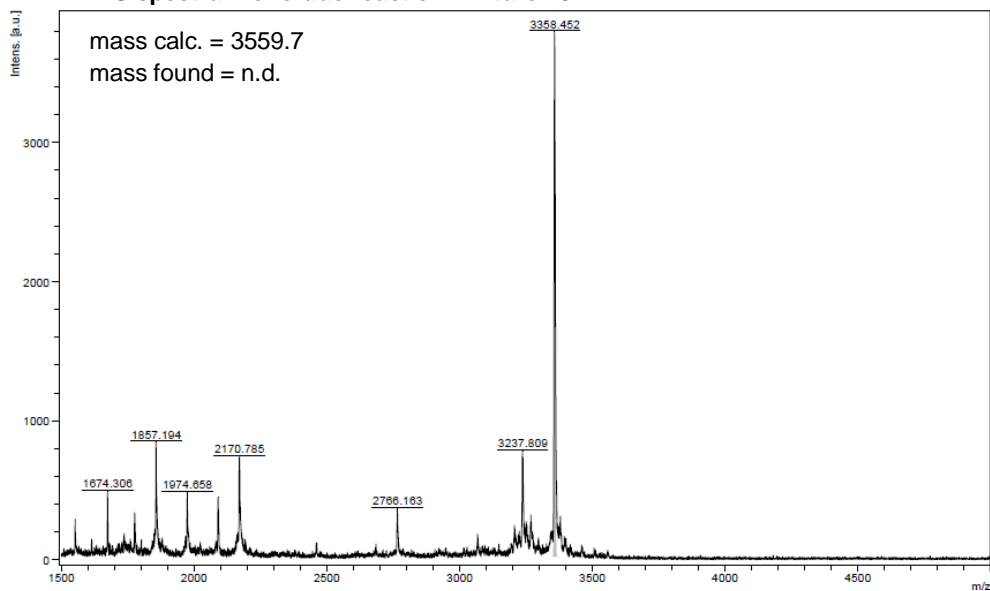

**DNA conjugate 23n:** CPG-coupled 10mer ATGC-aldehyde conjugate **15a** was reacted with 2,3-dimethoxyaniline **12m** and *N*-Boc-2,3-dihydro-1H-pyrrole **20** according to RP-09.

**HPLC trace of crude reaction mixture 23n (Analytical RP-HPLC, Method-II)**

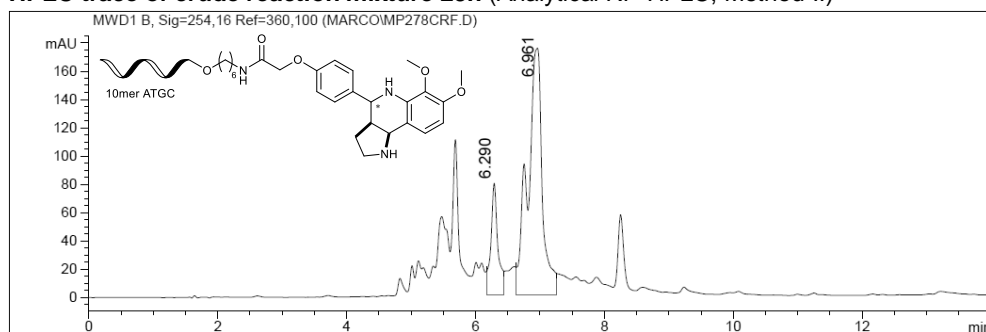

Peak list:

| Ret. Time | Width min | Height  | Area     | Area % |
|-----------|-----------|---------|----------|--------|
| 6.290     | 0.127     | 79.191  | 605.753  | 18.252 |
| 6.961     | 0.259     | 174.555 | 2713.016 | 81.748 |

**HPLC trace of isolated product 23n (Analytical RP-HPLC, Method-II)**

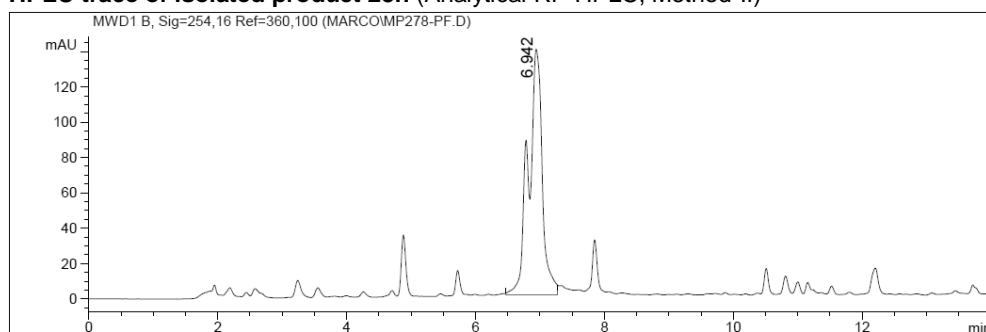

Peak list:

| Ret. Time | Width min | Height  | Area     | Area %  |
|-----------|-----------|---------|----------|---------|
| 6.942     | 0.248     | 139.371 | 2069.797 | 100.000 |

**MALDI-MS spectrum of isolated product 23n**

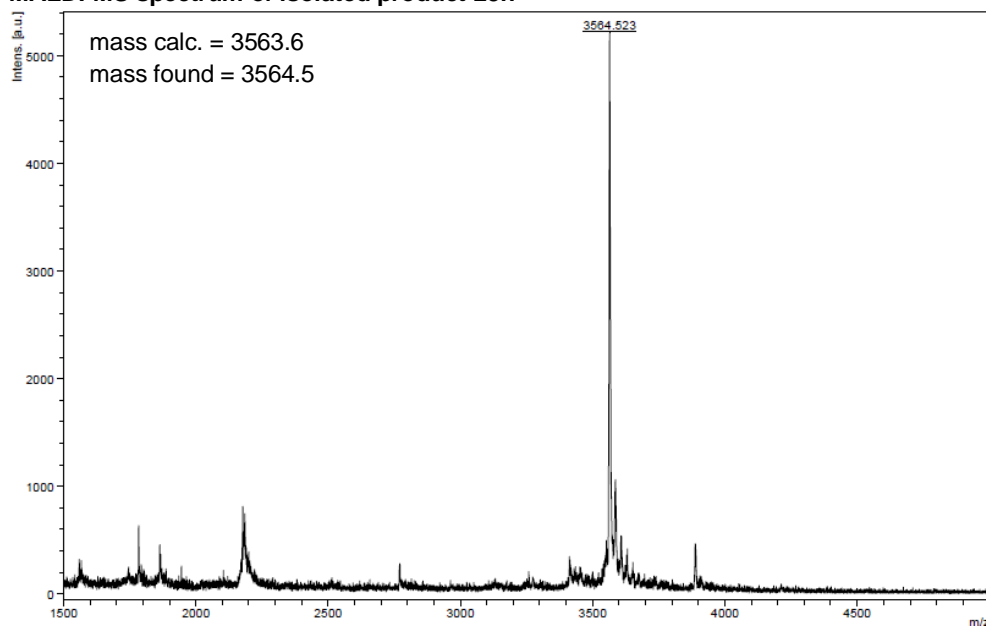



**DNA conjugate 23o:** CPG-coupled 10mer ATGC-aldehyde conjugate **15a** was reacted with 3,4-dimethoxyaniline **12l** and *N*-Boc-2,3-dihydro-1H-pyrrole **20** according to RP-09.

**HPLC trace of crude reaction mixture 23o (Analytical RP-HPLC, Method-II)**

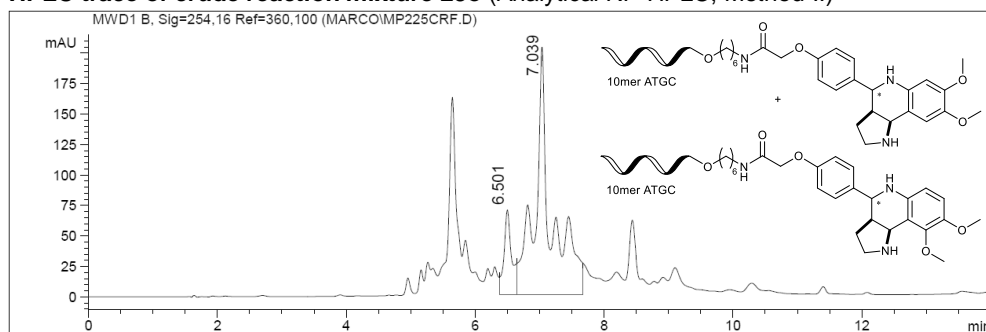

Peak list:

| Ret. Time | Width min | Height  | Area     | Area % |
|-----------|-----------|---------|----------|--------|
| 6.501     | 0.140     | 69.709  | 584.579  | 14.143 |
| 7.039     | 0.290     | 203.822 | 3548.664 | 85.857 |

**HPLC trace of isolated product 23o (Analytical RP-HPLC, Method-II)**

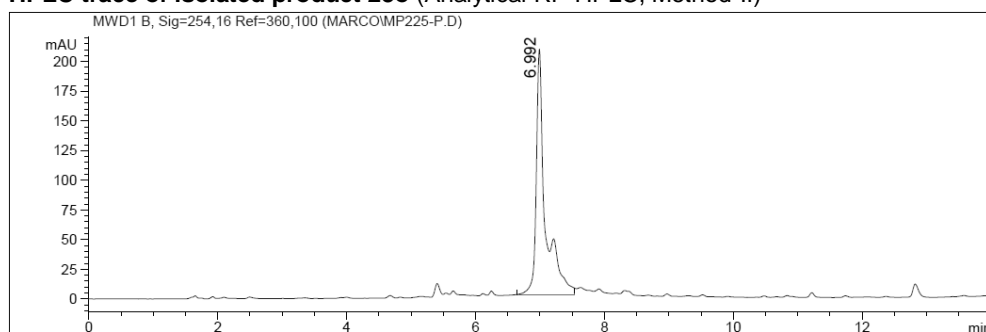

Peak list:

| Ret. Time | Width min | Height  | Area     | Area %  |
|-----------|-----------|---------|----------|---------|
| 6.992     | 0.162     | 207.279 | 2009.840 | 100.000 |

**MALDI-MS spectrum of isolated product 23o**

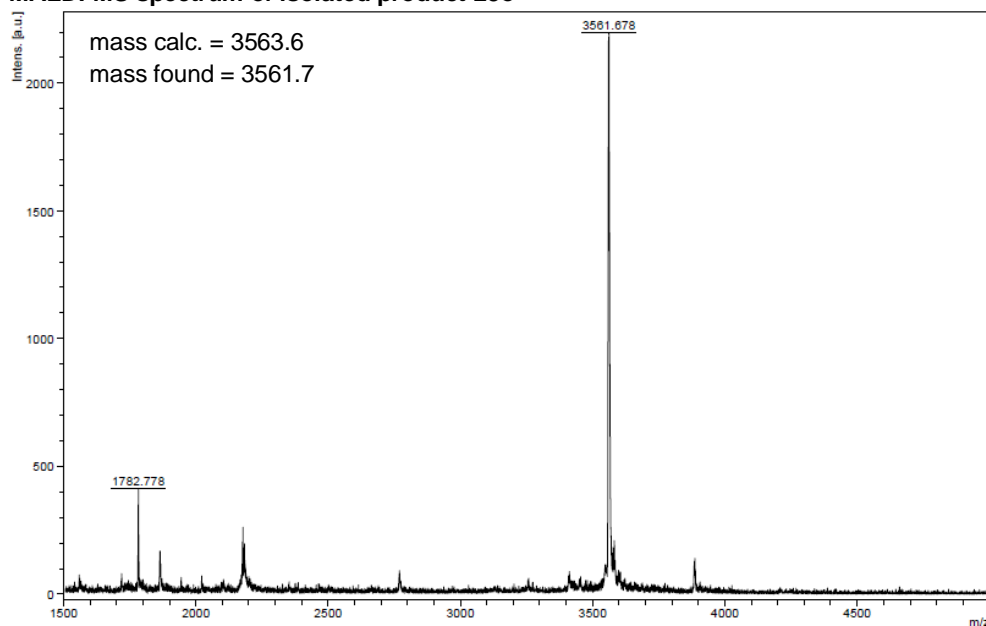

**DNA conjugate 23p:** CPG-coupled 10mer ATGC-aldehyde conjugate **15a** was reacted with 3-ethynylaniline **12o** and *N*-Boc-2,3-dihydro-1H-pyrrole **20** according to RP-09.

**HPLC trace of crude reaction mixture 23p (Analytical RP-HPLC, Method-II)**

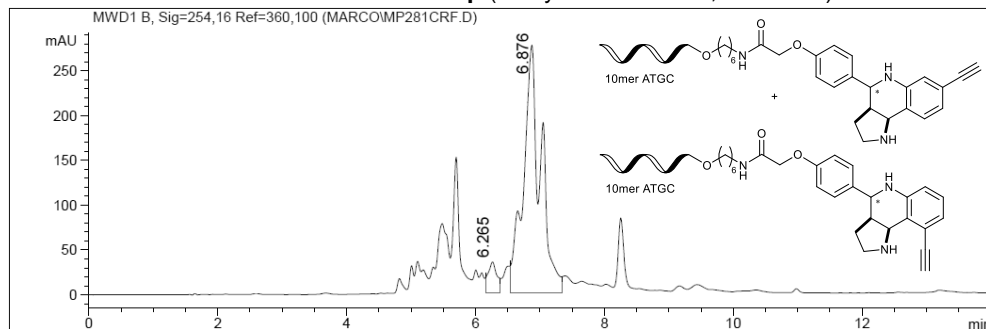

Peak list:

| Ret. Time | Width min | Height  | Area     | Area % |
|-----------|-----------|---------|----------|--------|
| 6.265     | 0.156     | 34.292  | 321.008  | 5.862  |
| 6.876     | 0.311     | 276.447 | 5154.825 | 94.138 |

**HPLC trace of isolated product 23p (Analytical RP-HPLC, Method-II)**

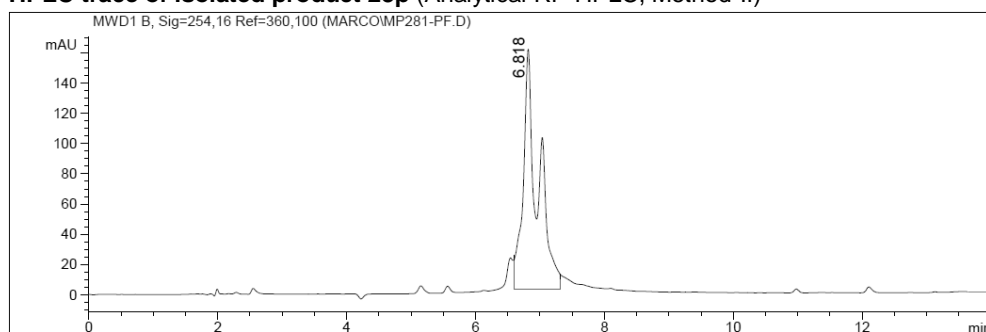

Peak list:

| Ret. Time | Width min | Height  | Area     | Area %  |
|-----------|-----------|---------|----------|---------|
| 6.818     | 0.257     | 158.818 | 2453.143 | 100.000 |

**MALDI-MS spectrum of isolated product 23p**

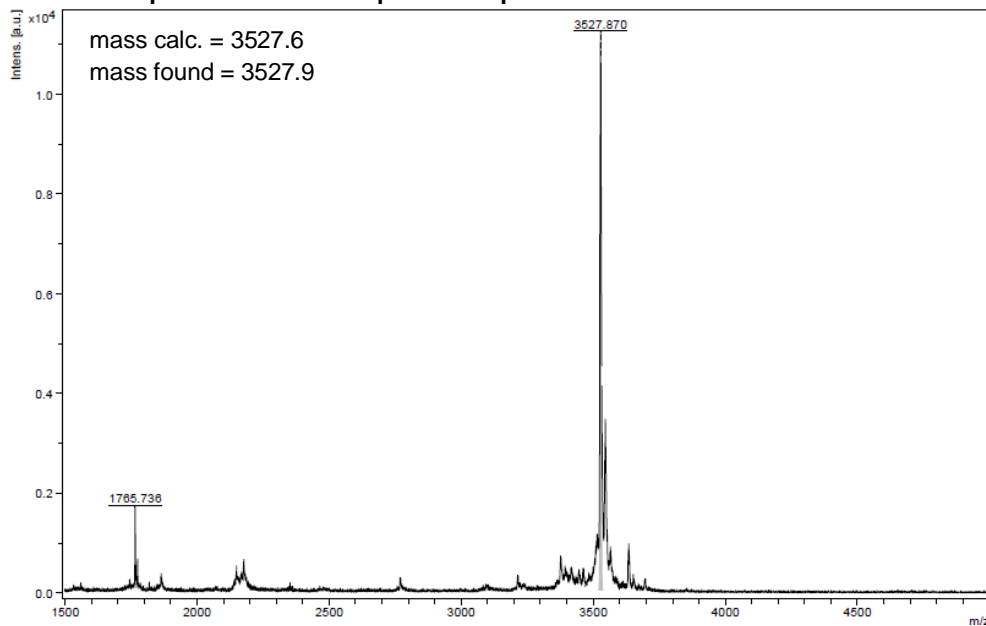

**DNA conjugate 23q:** CPG-coupled 10mer ATGC-aldehyde conjugate **15a** was reacted with 3-(2H-tetrazol-5-yl)aniline **12p** and *N*-Boc-2,3-dihydro-1H-pyrrole **20** according to RP-09.

**HPLC trace of crude reaction mixture 23q (Analytical RP-HPLC, Method-II)**

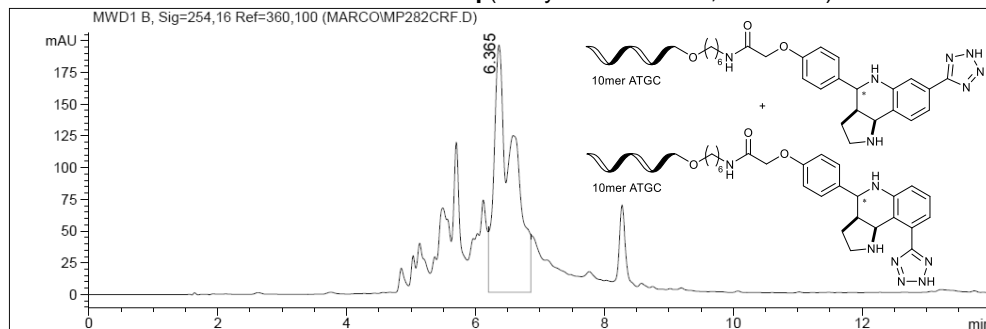

Peak list:

| Ret. Time | Width min | Height  | Area     | Area %  |
|-----------|-----------|---------|----------|---------|
| 6.365     | 0.340     | 194.807 | 3973.136 | 100.000 |

**HPLC trace of isolated product 23q (Analytical RP-HPLC, Method-II)**

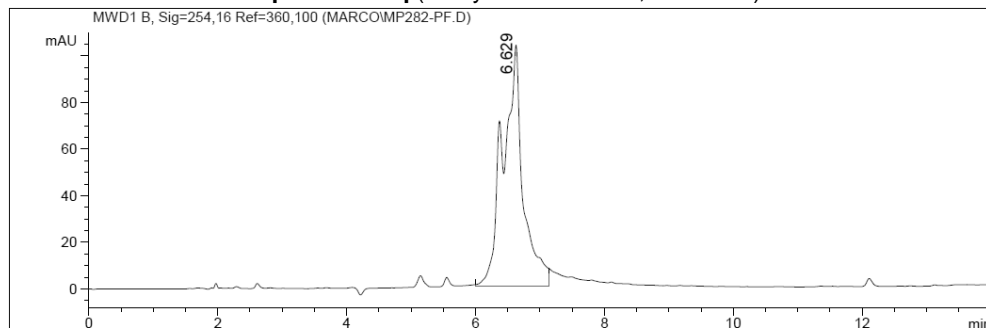

Peak list:

| Ret. Time | Width min | Height  | Area     | Area %  |
|-----------|-----------|---------|----------|---------|
| 6.629     | 0.359     | 103.453 | 2230.785 | 100.000 |

**MALDI-MS spectrum of isolated product 23q**

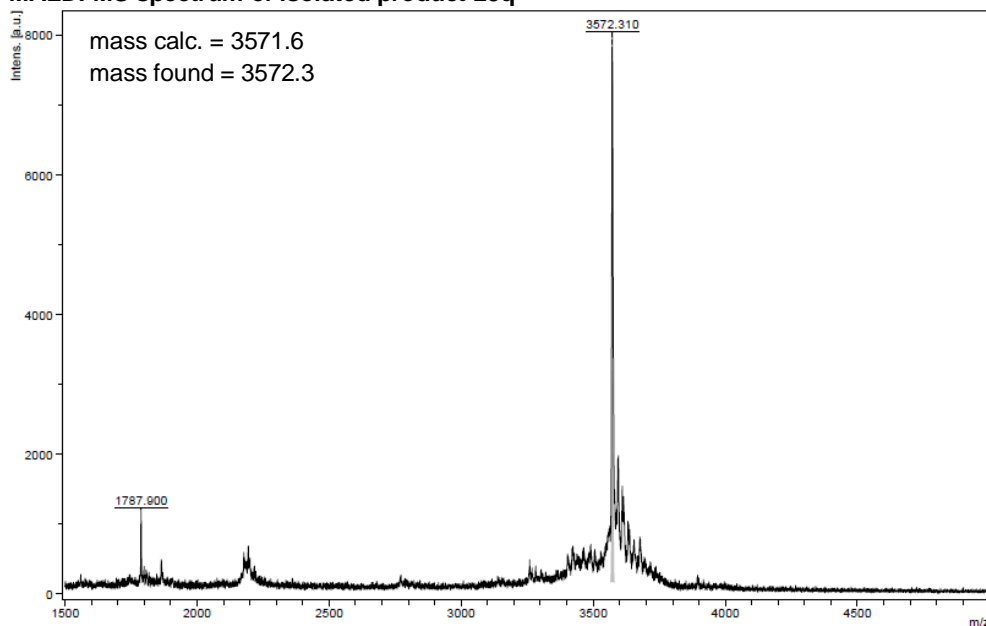

**DNA conjugate 23r:** CPG-coupled 10mer ATGC-aldehyde conjugate **15a** was reacted with 2-(hydroxyl-methyl)aniline **12v** and *N*-Boc-2,3-dihydro-1H-pyrrole **20** according to RP-09.

**HPLC trace of crude reaction mixture 23r (Analytical RP-HPLC, Method-II)**

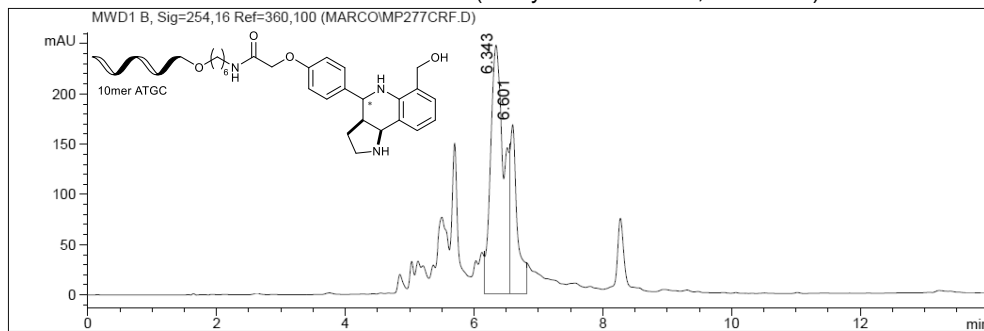

Peak list:

| Ret. Time | Width min | Height  | Area     | Area % |
|-----------|-----------|---------|----------|--------|
| 6.343     | 0.245     | 247.679 | 3641.017 | 75.375 |
| 6.601     | 0.118     | 168.657 | 1189.490 | 24.625 |

**HPLC trace of isolated product 23r (Analytical RP-HPLC, Method-II)**

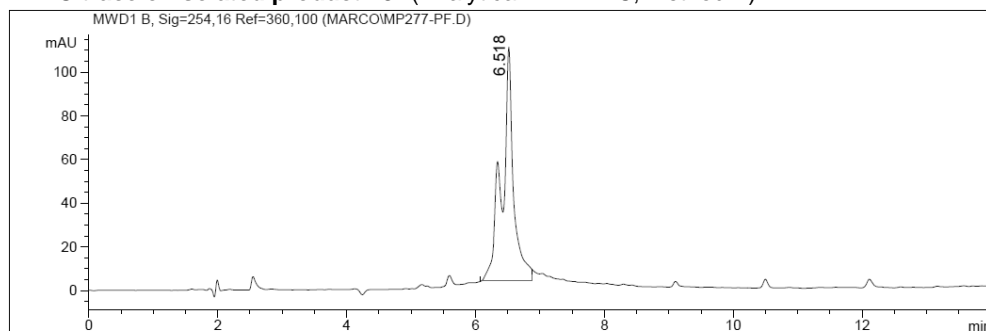

Peak list:

| Ret. Time | Width min | Height  | Area     | Area %  |
|-----------|-----------|---------|----------|---------|
| 6.518     | 0.207     | 107.314 | 1331.752 | 100.000 |

**MALDI-MS spectrum of isolated product 23r**

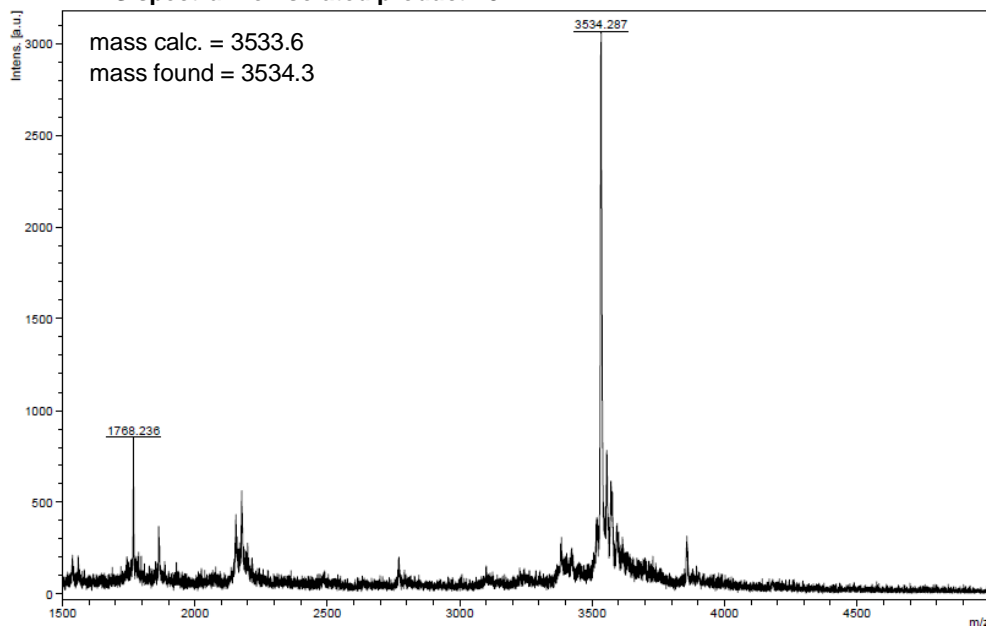

**DNA conjugate 23s:** CPG-coupled 10mer ATGC-aldehyde conjugate **15a** was reacted with 2-benzylaniline **12w** and *N*-Boc-2,3-dihydro-1H-pyrrole **20** according to RP-09.

**HPLC trace of crude reaction mixture 23s (Analytical RP-HPLC, Method-II)**

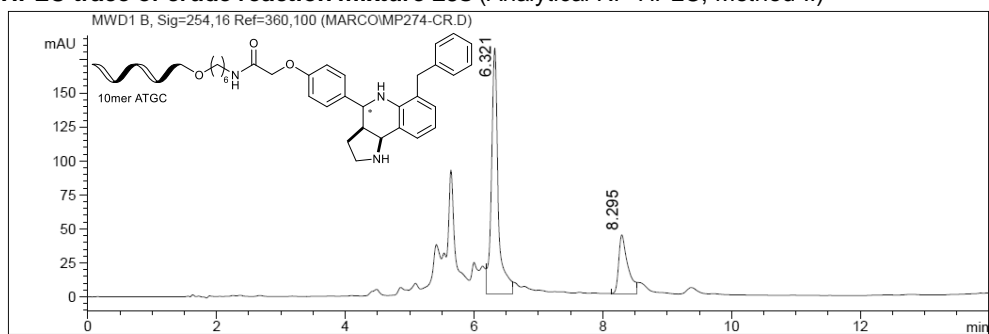

Peak list:

| Ret. Time | Width min | Height  | Area     | Area % |
|-----------|-----------|---------|----------|--------|
| 6.321     | 0.121     | 181.120 | 1319.821 | 75.428 |
| 8.295     | 0.165     | 43.493  | 429.965  | 24.572 |

**MALDI-MS spectrum of crude reaction mixture 23s**

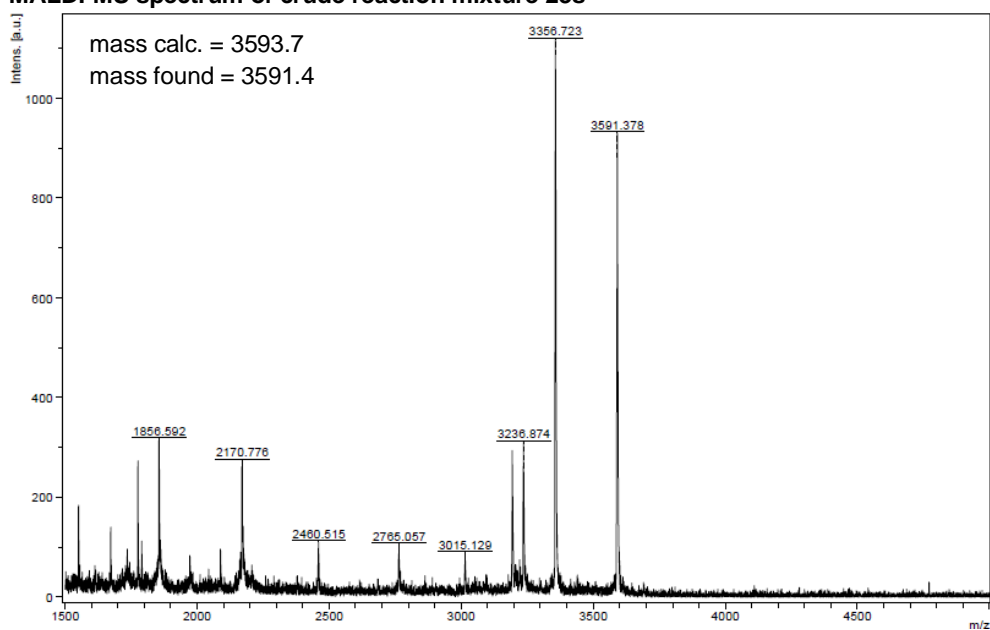

**DNA conjugate 23t:** CPG-coupled 10mer ATGC-aldehyde conjugate **15a** was reacted with 4-Aminopyridine **12q** and *N*-Boc-2,3-dihydro-1H-pyrrole **20** according to RP-09.

**HPLC trace of crude reaction mixture 23t (Analytical RP-HPLC, Method-II)**

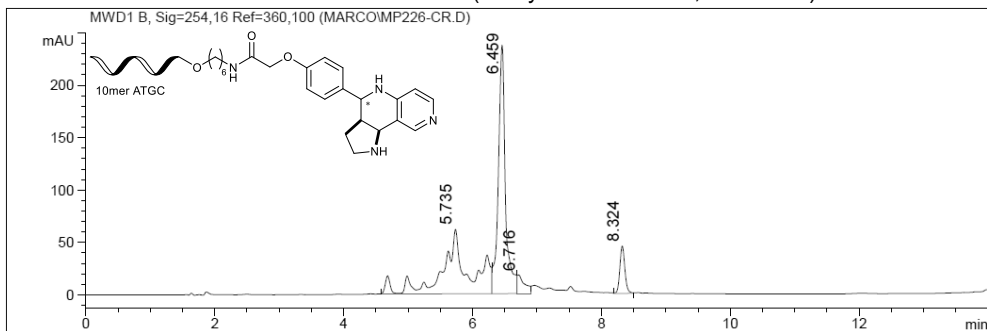

Peak list:

| Ret. Time | Width min | Height  | Area     | Area % |
|-----------|-----------|---------|----------|--------|
| 5.735     | 0.451     | 61.583  | 1664.991 | 43.046 |
| 6.459     | 0.127     | 237.525 | 1817.064 | 46.977 |
| 6.716     | 0.133     | 17.753  | 141.318  | 3.654  |
| 8.324     | 0.090     | 45.401  | 244.597  | 6.324  |

**MALDI-MS spectrum of crude reaction mixture 23t**

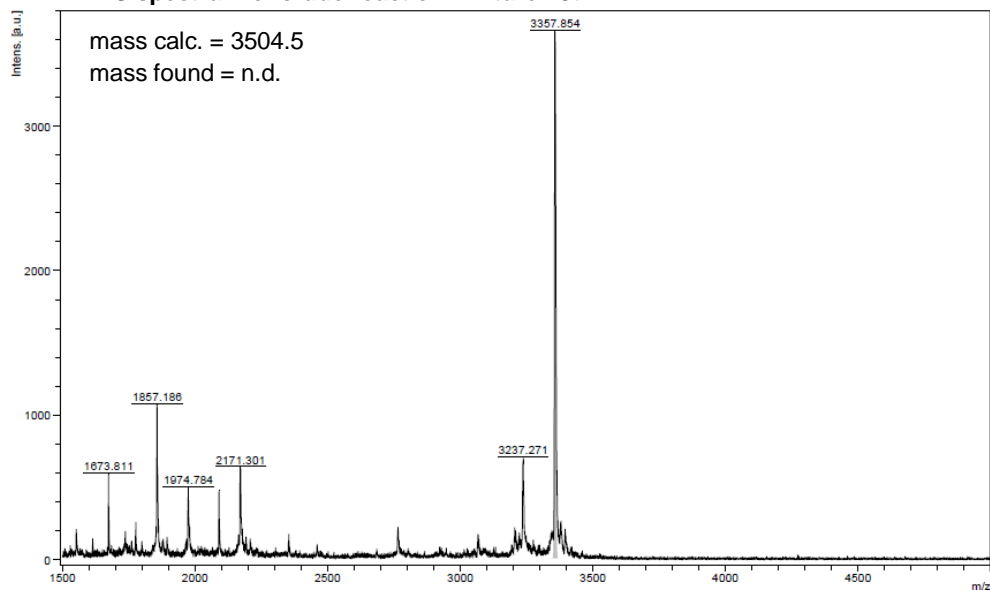

**DNA conjugate 23u:** CPG-coupled 10mer ATGC-aldehyde conjugate **15a** was reacted with 4-Aminopyrimidine **12x** and *N*-Boc-2,3-dihydro-1H-pyrrole **20** according to RP-09.

**HPLC trace of crude reaction mixture 23u (Analytical RP-HPLC, Method-II)**

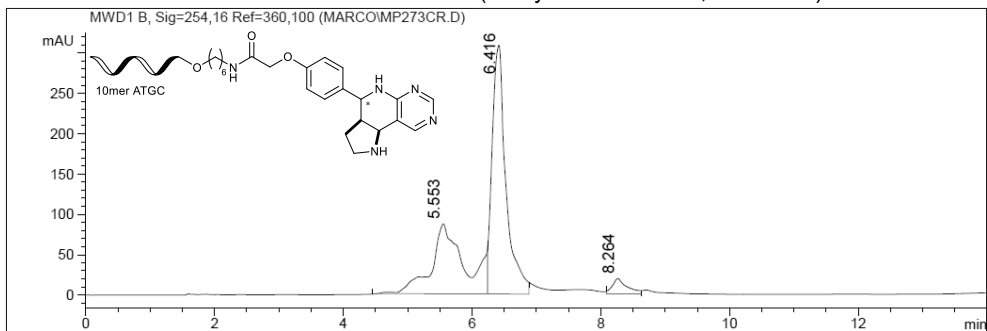

Peak list:

| Ret. Time | Width min | Height  | Area     | Area % |
|-----------|-----------|---------|----------|--------|
| 5.553     | 0.585     | 86.666  | 3044.036 | 38.275 |
| 6.416     | 0.248     | 308.370 | 4595.420 | 57.781 |
| 8.264     | 0.271     | 19.285  | 313.670  | 3.944  |

**MALDI-MS spectrum of crude reaction mixture 23u**

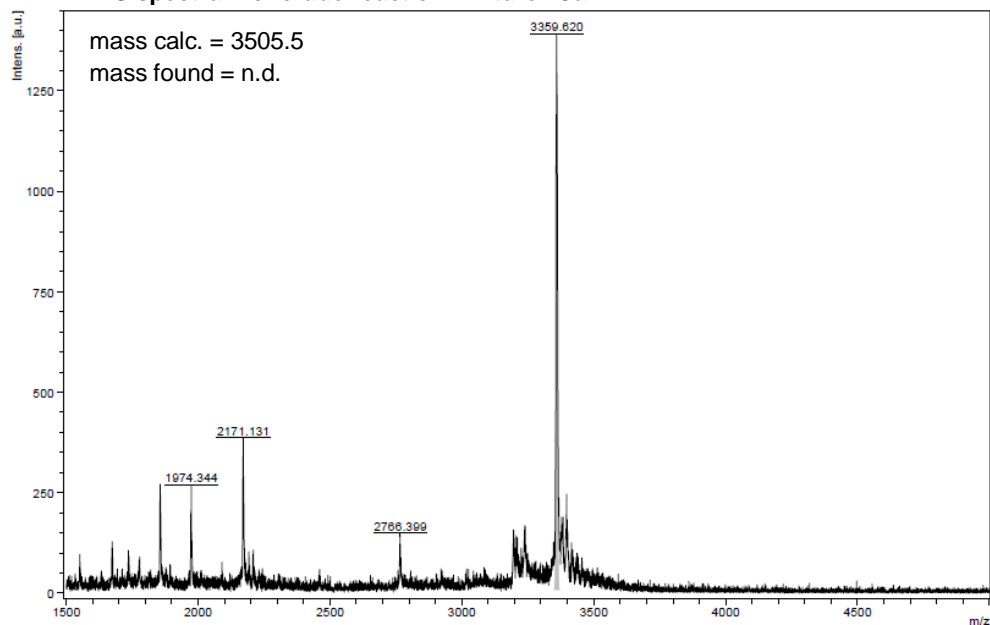

**DNA conjugate 23v:** CPG-coupled 10mer ATGC-aldehyde conjugate **15b** was reacted with aniline **12a** and *N*-Boc-2,3-dihydro-1H-pyrrole **20** according to RP-09.

**HPLC trace of crude reaction mixture 23v (Analytical RP-HPLC, Method-II)**

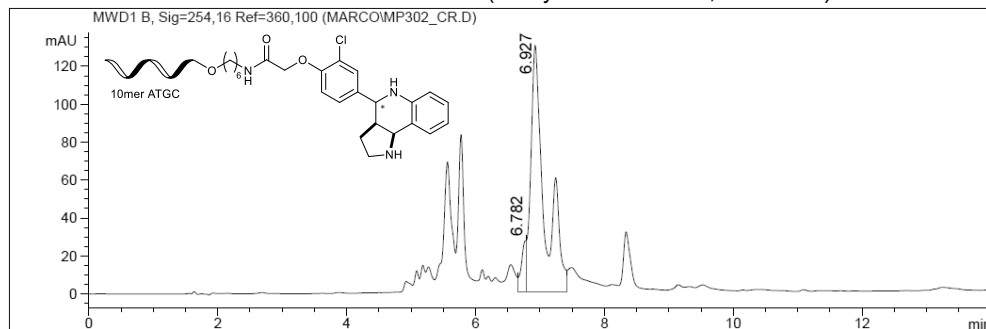

Peak list:

| Ret. Time | Width min | Height  | Area     | Area % |
|-----------|-----------|---------|----------|--------|
| 6.782     | 0.091     | 27.097  | 147.754  | 7.261  |
| 6.927     | 0.242     | 130.151 | 1887.230 | 92.739 |

**HPLC trace of isolated product 23v (Analytical RP-HPLC, Method-II)**

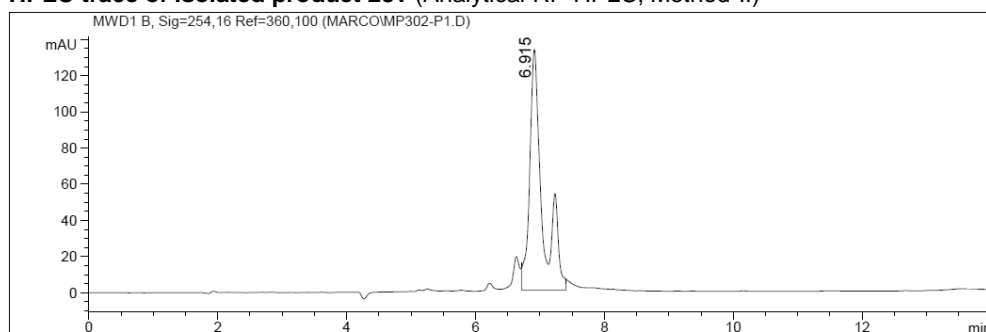

Peak list:

| Ret. Time | Width min | Height  | Area     | Area %  |
|-----------|-----------|---------|----------|---------|
| 6.915     | 0.227     | 133.464 | 1821.646 | 100.000 |

**MALDI-MS spectrum of isolated product 23v**

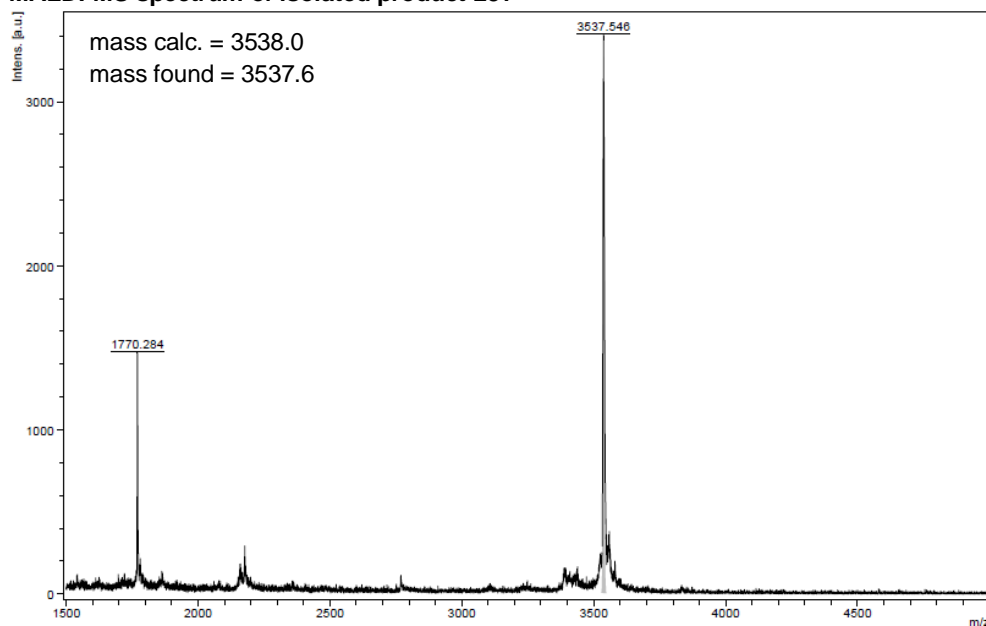



**DNA conjugate 23w:** CPG-coupled 10mer ATGC-aldehyde conjugate **15c** was reacted with aniline **12a** and *N*-Boc-2,3-dihydro-1H-pyrrole **20** according to RP-09.

**HPLC trace of crude reaction mixture 23w (Analytical RP-HPLC, Method-II)**

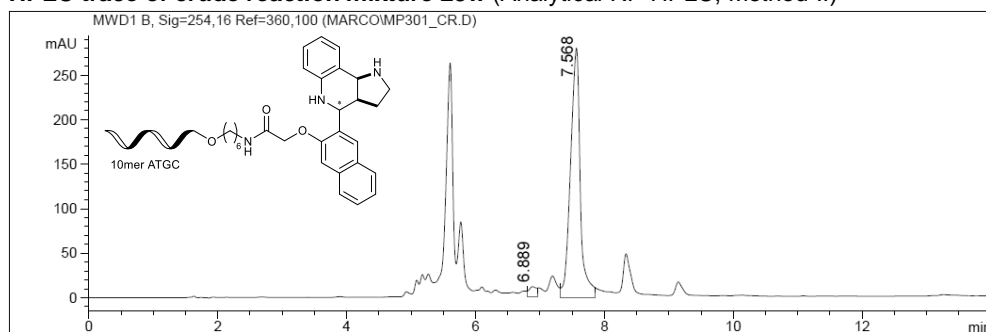

Peak list:

| Ret. Time | Width min | Height  | Area     | Area % |
|-----------|-----------|---------|----------|--------|
| 6.889     | 0.145     | 11.785  | 102.258  | 3.377  |
| 7.568     | 0.174     | 280.383 | 2925.668 | 96.623 |

**MALDI-MS spectrum of isolated product 23w**

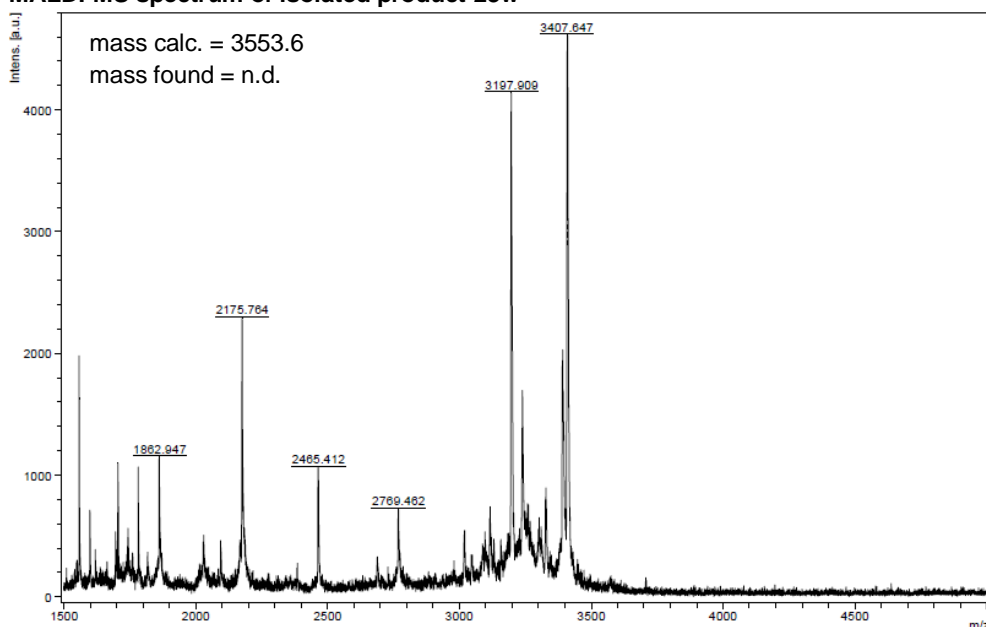

## (R)-(-)-BNDHP-mediated Biginelli reaction on CPG-coupled oligonucleotides

**Table S11** Optimization of (R)-(-)-BNDHP -mediated Biginelli reaction on CPG-coupled hexT.<sup>a</sup>

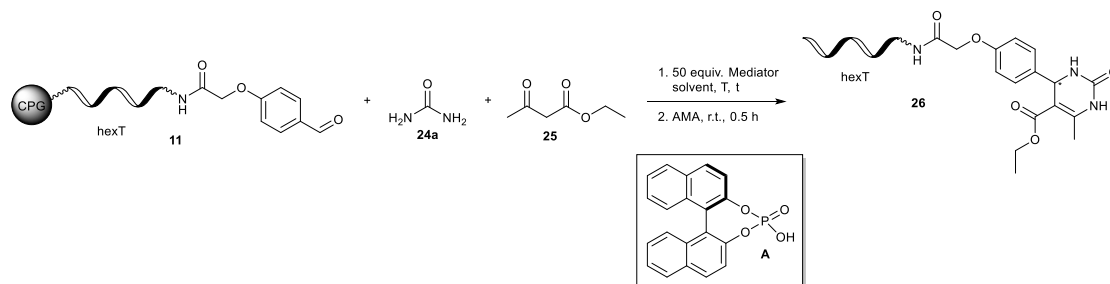

| Entry | Reaction conditions <sup>b</sup>                                          | HPLC trace of crude reaction mixture <sup>c</sup>                                    |
|-------|---------------------------------------------------------------------------|--------------------------------------------------------------------------------------|
| 1     | hexT-aldehyde conjugate <b>11</b>                                         | 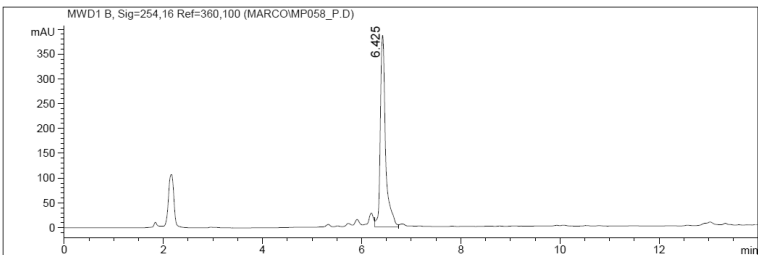   |
| 2     | hexT-dihydropyrimidinone conjugate <b>26</b>                              |   |
| 3     | 50 equiv. Yb(OTf) <sub>3</sub><br>THF, r.t., 20 h<br>=> conversion <5 %   |  |
| 4     | 50 equiv. (R)-(-)-BNDHP <b>A</b><br>THF, r.t., 20 h<br>=> conversion < 5% |  |
| 5     | 50 equiv. Yb(OTf) <sub>3</sub><br>THF, 50 °C, 20 h<br>=> conversion 24 %  |  |

6

50 equiv. **(R)-(-)-BNDHP A**  
THF, **50 °C**, 20 h

=> conversion 28 %

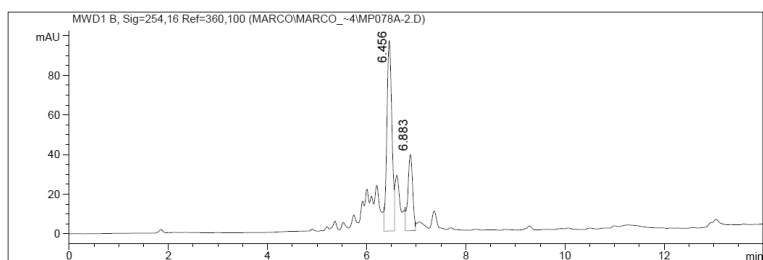

7

50 equiv. **Yb(OTf)<sub>3</sub>**  
**EtOH**, *r.t.*, 20 h

=> conversion 47 %

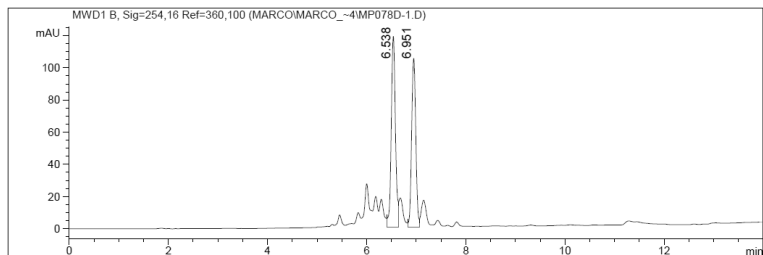

8

50 equiv. **Mg(ClO<sub>4</sub>)<sub>2</sub>**  
**EtOH**, *r.t.*, 20 h

=> conversion <5 %

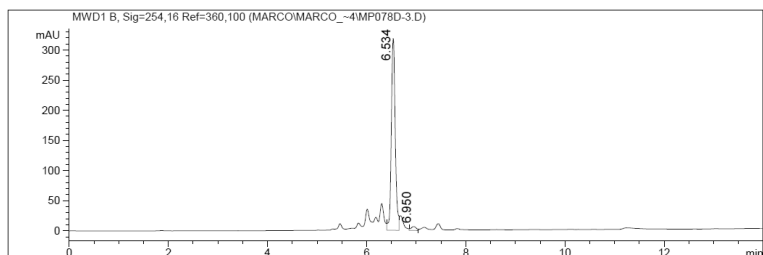

9

50 equiv. **(R)-(-)-BNDHP A**  
**EtOH**, *r.t.*, 20 h

=> conversion 13 %

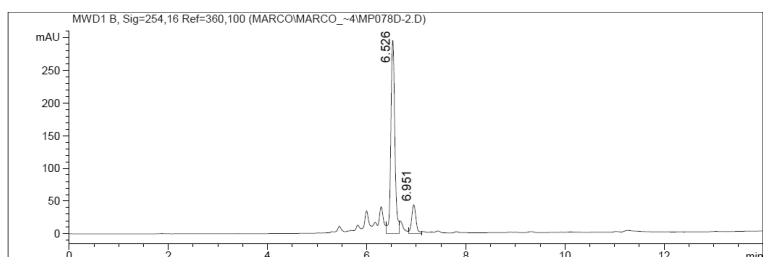

10

50 equiv. **Yb(OTf)<sub>3</sub>**  
**EtOH**, **50 °C**, 20 h

=> conversion 65 %

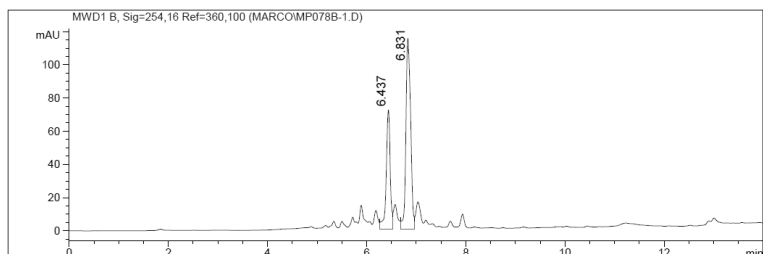

11

50 equiv. **Mg(ClO<sub>4</sub>)<sub>2</sub>**  
**EtOH**, **50 °C**, 20 h

=> conversion 65 %

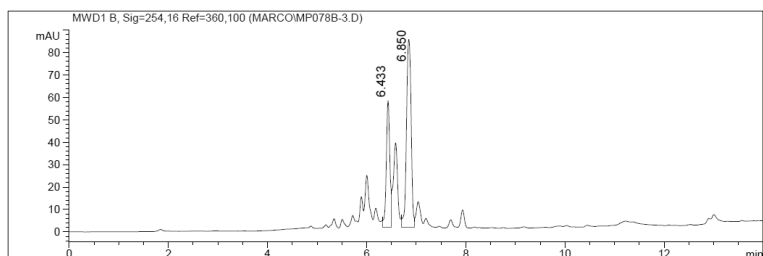

12

50 equiv. **(R)-(-)-BNDHP A**  
**EtOH**, **50 °C**, 20 h

=> conversion 97 %

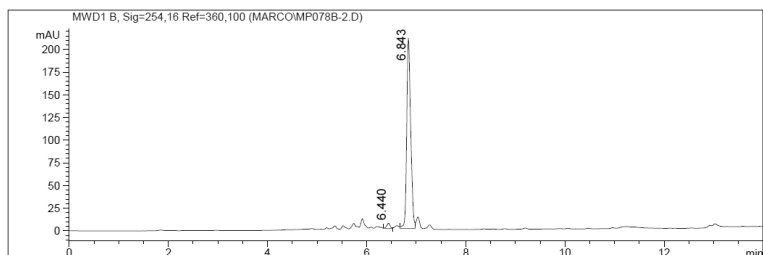

13

50 equiv. (*R*)-(-)-BNDHP **A**  
EtOH, 50 °C, **4 h**

=> conversion 14 %

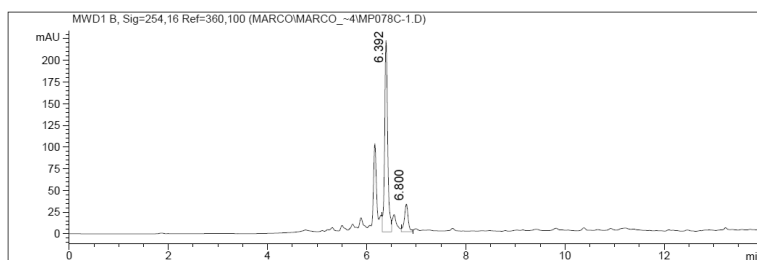

14

50 equiv. (*R*)-(-)-BNDHP **A**  
EtOH, 50 °C, **8 h**

=> conversion 40 %

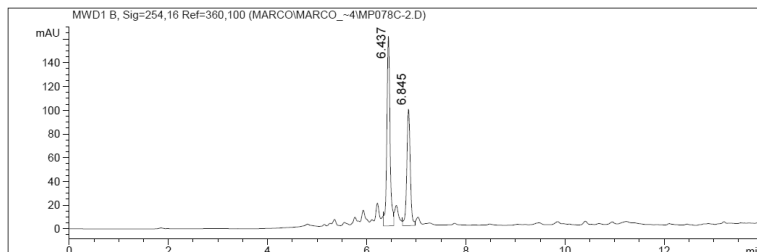

<sup>a</sup> CPG-coupled hexT aldehyde conjugate **11** (20 nmol) was suspended in indicated solvent with urea **24a** (500 equiv.) and mediator (50 equiv., 1  $\mu$ mol) each dissolved or suspended in 30  $\mu$ L of indicated solvent and ethyl acetoacetate **25** (500 equiv.), reaction mixture was shaken at indicated temperature for 20 h. Afterwards AMA (30% aqueous ammonia / 40% aqueous methylamine, 1:1 (vol/vol)) at ambient temperature for 0.5 h. <sup>b</sup> parameters that were changed are in bold and italic. <sup>c</sup> Analytical RP-HPLC, Method-I.

**Table S12** – Scope of (*R*)-(-)-BNDHP **A**-mediated Biginelli reaction on CPG-coupled 10mer ATGC oligonucleotide-aldehyde conjugates **15** with ureas **24** and ethyl acetoacetate **25**.<sup>a</sup>

| Entry | Product    | DNA-aldehyde conjugate | Urea           | Conversion [%] <sup>b</sup> | Mass <sub>calc.</sub><br>Mass <sub>found</sub> <sup>d</sup> |
|-------|------------|------------------------|----------------|-----------------------------|-------------------------------------------------------------|
| 1     | <b>27a</b> | <br><b>15a</b>         | <br><b>24a</b> | 90                          | 3513.5<br>3513.3                                            |
| 2     | <b>27b</b> | <br><b>15a</b>         | <br><b>24b</b> | 59                          | 3541.5<br>3540.0                                            |
| 3     | <b>27c</b> | <br><b>15a</b>         | <br><b>24c</b> | 10<br>(75 <sup>c,d</sup> )  | 3589.6<br>3593.6                                            |
| 4     | <b>27d</b> | <br><b>15a</b>         | <br><b>24d</b> | 85                          | 3603.6<br>3602.9                                            |
| 5     | <b>27e</b> | <br><b>15b</b>         | <br><b>24a</b> | 92                          | 3547.9<br>3547.9                                            |
| 6     | <b>27f</b> | <br><b>15c</b>         | <br><b>24a</b> | n.d.                        | 3563.6<br>n.d.                                              |

<sup>a</sup> CPG-coupled ATGC aldehyde conjugate **15** (20 nmol) was suspended with urea **24** (500 equiv.) and (*R*)-(-)-BNDHP **A** (50 equiv., 1  $\mu$ mol) each dissolved in 30  $\mu$ L of ethanol and ethyl acetoacetate **25** (500 equiv.), reaction mixture was shaken at 50  $^{\circ}$ C for 20 h. Afterwards AMA (30% aqueous ammonia / 40% aqueous methylamine, 1:1 (vol/vol)) at ambient temperature for four h. <sup>b</sup> Determined by analytical RP-HPLC analysis. <sup>c</sup> 200 equiv. of (*R*)-(-)-BNDHP **A** were used. <sup>d</sup> reaction was performed at 50  $^{\circ}$ C for 44 h. <sup>d</sup> Measured by MALDI-MS. 10mer ATGC = 5'-GTC ATG ATC T-3', n.d. = not detected.

## Products of Biginelli reaction on CPG-coupled oligonucleotide-aldehyde conjugate

**DNA conjugate 26:** CPG-coupled 10mer hexT-aldehyde conjugate **11** was reacted with urea **24a** and ethyl acetoacetate **25** according to RP-10.

### HPLC trace of crude reaction mixture 26 (Analytical RP-HPLC, Method-III)

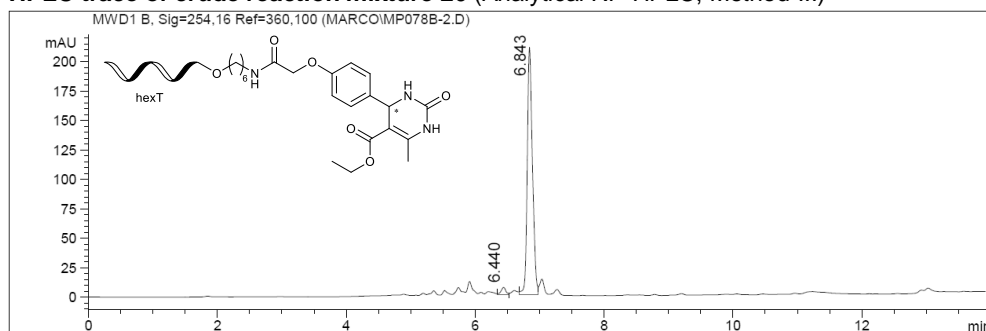

### HPLC trace of isolated product 26 (Analytical RP-HPLC, Method-II)

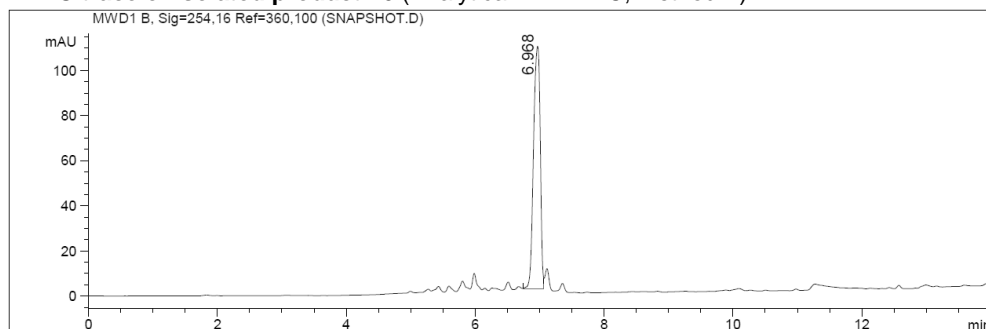

### MALDI-MS spectrum of isolated product 26

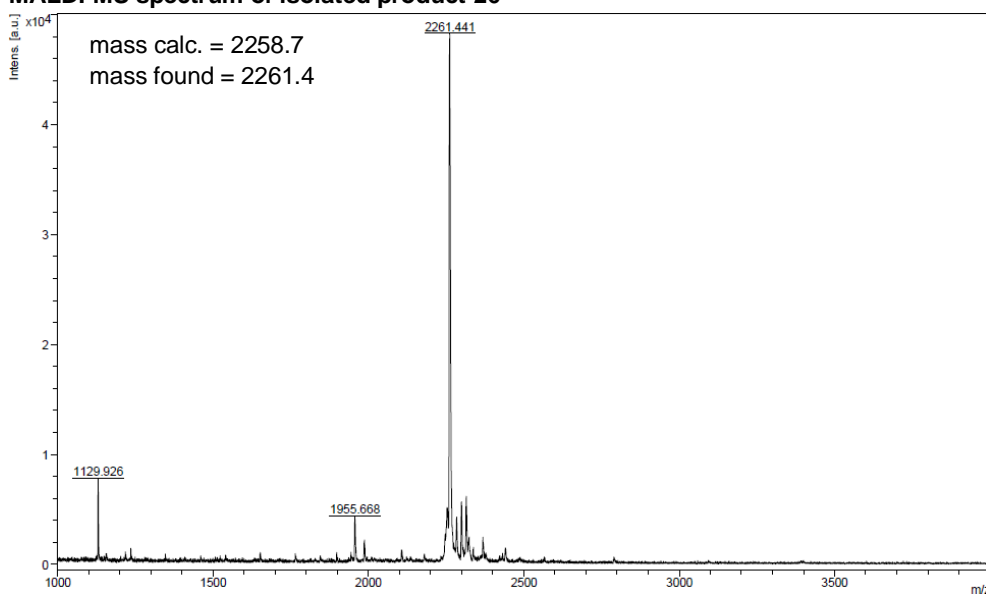

**DNA conjugate 27a:** CPG-coupled 10mer ATGC-aldehyde conjugate **15a** was reacted with urea **24a** and ethyl acetoacetate **25** according to RP-10.

#### HPLC trace of crude reaction mixture 27a (Analytical RP-HPLC, Method-III)

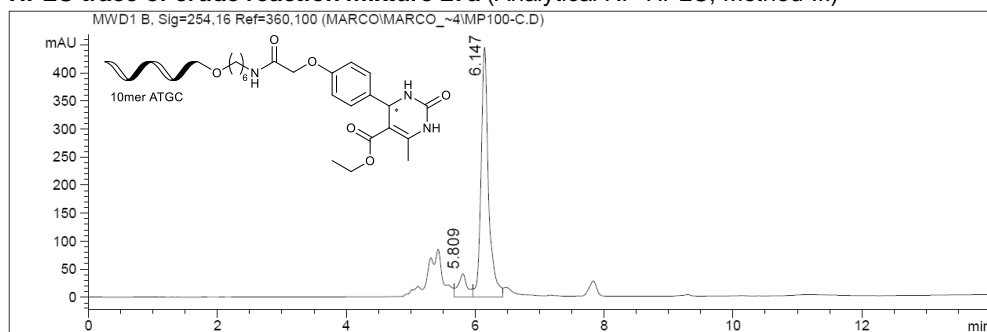

Peak list:

| Ret. Time | Width min | Height  | Area     | Area % |
|-----------|-----------|---------|----------|--------|
| 5.809     | 0.158     | 41.502  | 394.660  | 9.946  |
| 6.147     | 0.134     | 445.623 | 3573.551 | 90.054 |

#### HPLC trace of isolated product 27a (Analytical RP-HPLC, Method-III)

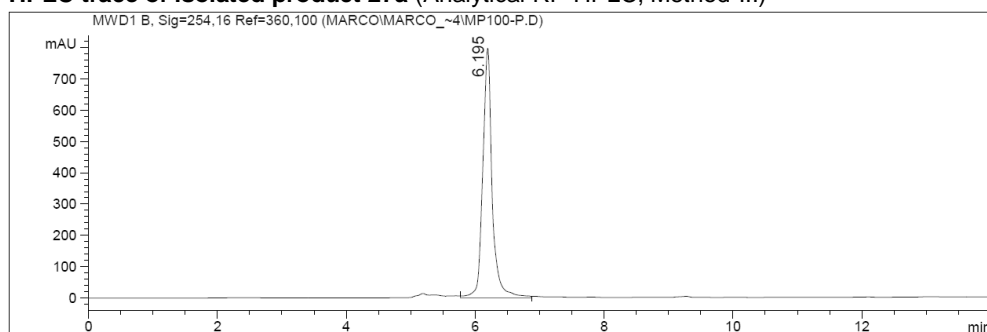

Peak list:

| Ret. Time | Width min | Height  | Area     | Area %  |
|-----------|-----------|---------|----------|---------|
| 6.195     | 0.144     | 796.682 | 8070.688 | 100.000 |

#### MALDI-MS spectrum of isolated product 27a

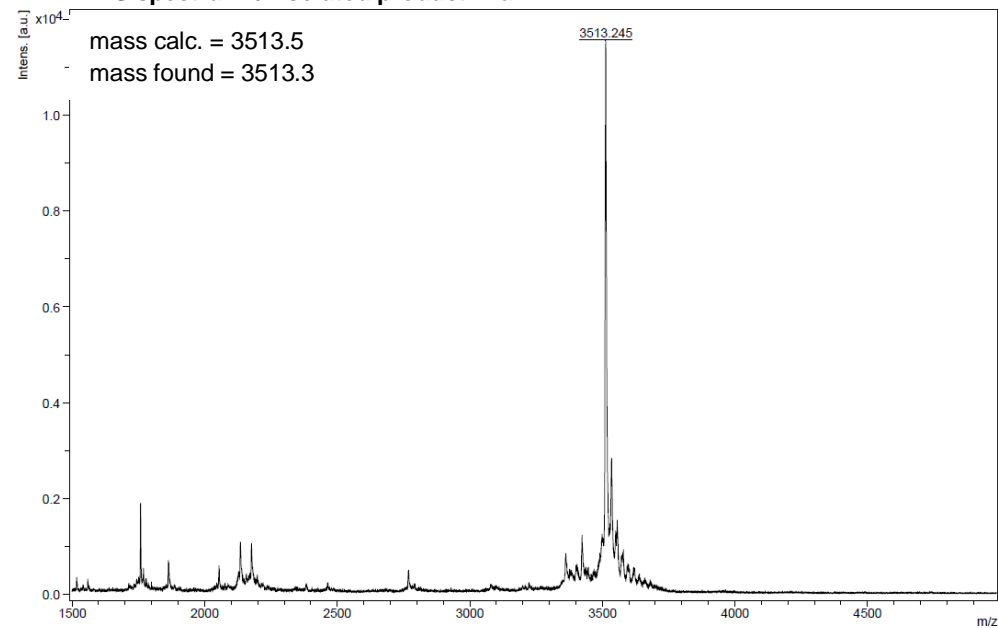

**DNA conjugate 27b:** CPG-coupled 10mer ATGC-aldehyde conjugate **15a** was reacted with *N*-ethylurea **24b** and ethyl acetoacetate **25** according to RP-10.

**HPLC trace of crude reaction mixture 27b (Analytical RP-HPLC, Method-III)**

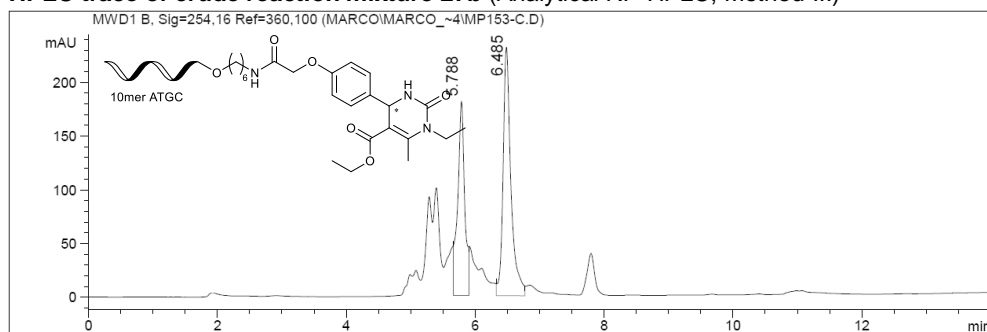

Peak list:

| Ret. Time | Width min | Height  | Area     | Area % |
|-----------|-----------|---------|----------|--------|
| 5.788     | 0.127     | 181.070 | 1382.508 | 41.493 |
| 6.485     | 0.140     | 232.049 | 1949.426 | 58.507 |

**HPLC trace of isolated product 27b (Analytical RP-HPLC, Method-III)**

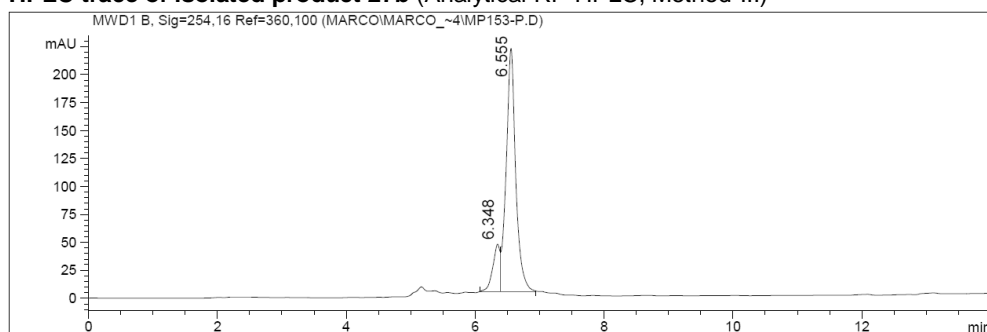

Peak list:

| Ret. Time | Width min | Height  | Area     | Area % |
|-----------|-----------|---------|----------|--------|
| 6.348     | 0.135     | 42.897  | 346.906  | 13.444 |
| 6.555     | 0.171     | 218.316 | 2233.427 | 86.556 |

**MALDI-MS spectrum of isolated product 27b**

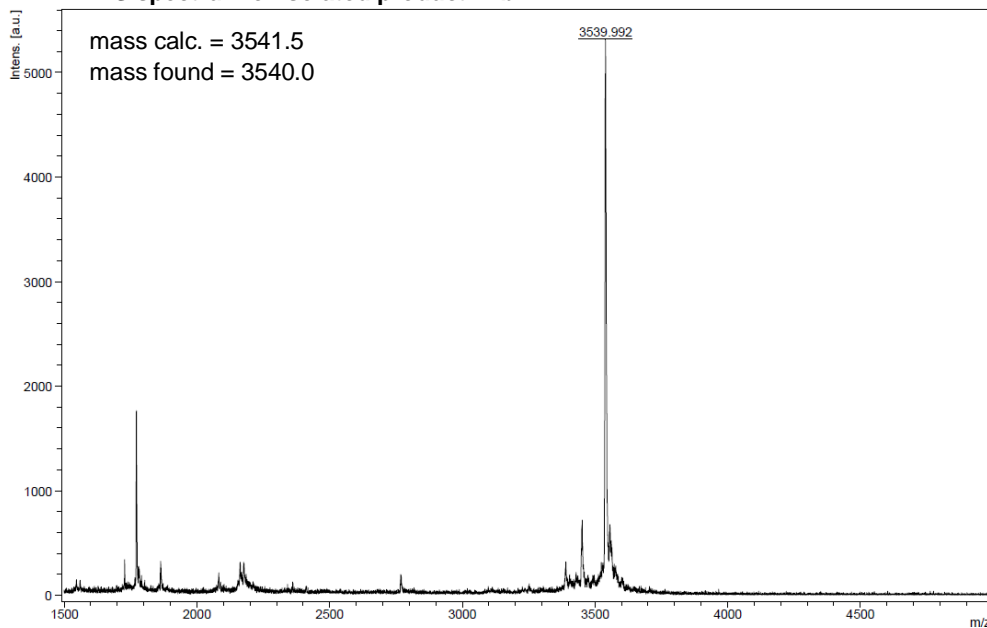



**DNA conjugate 27c:** CPG-coupled 10mer ATGC-aldehyde conjugate **15a** was reacted with *N*-phenylurea **24c** and ethyl acetoacetate **25** according to RP-10.

**HPLC trace of crude reaction mixture 27c (Analytical RP-HPLC, Method-III)**

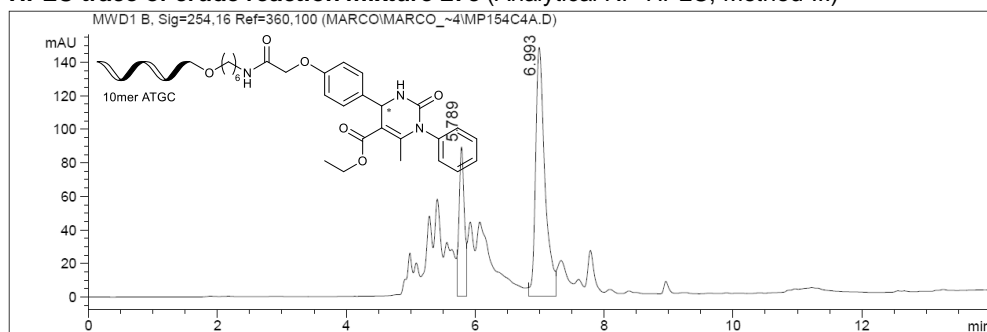

Peak list:

| Ret. Time | Width min | Height  | Area     | Area % |
|-----------|-----------|---------|----------|--------|
| 5.789     | 0.095     | 89.395  | 508.282  | 25.470 |
| 6.993     | 0.167     | 148.519 | 1487.302 | 74.530 |

**HPLC trace of isolated product 27c (Analytical RP-HPLC, Method-III)**

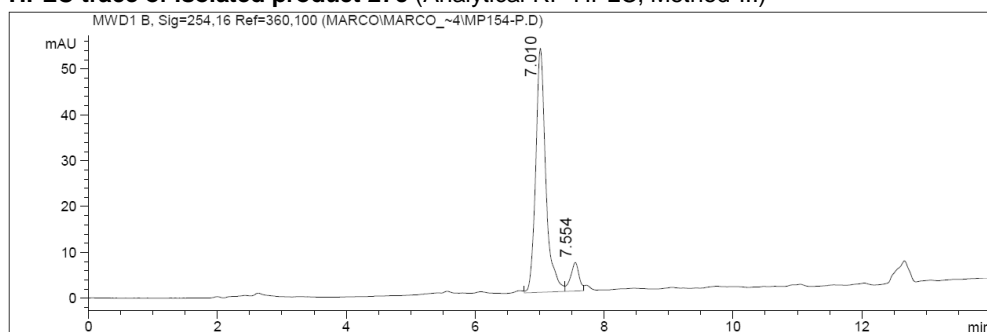

Peak list:

| Ret. Time | Width min | Height | Area    | Area % |
|-----------|-----------|--------|---------|--------|
| 7.010     | 0.159     | 53.187 | 577.659 | 91.044 |
| 7.554     | 0.133     | 6.209  | 56.827  | 8.956  |

**MALDI-MS spectrum of isolated product 27c**

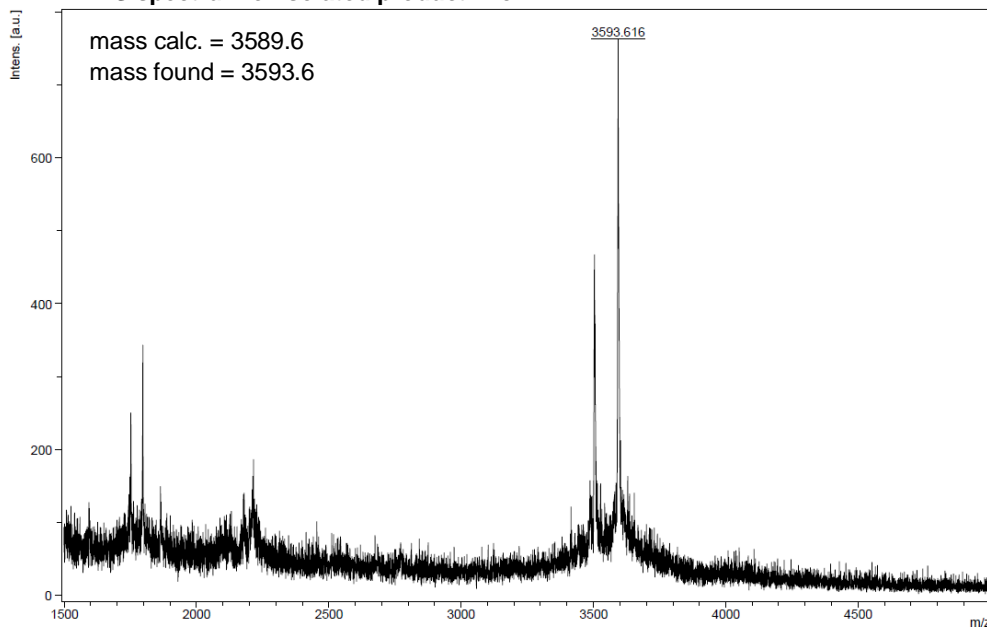

**DNA conjugate 27d:** CPG-coupled 10mer ATGC-aldehyde conjugate **15a** was reacted with *N*-benzylurea **24d** and ethyl acetoacetate **25** according to RP-10.

**HPLC trace of crude reaction mixture 27d (Analytical RP-HPLC, Method-III)**

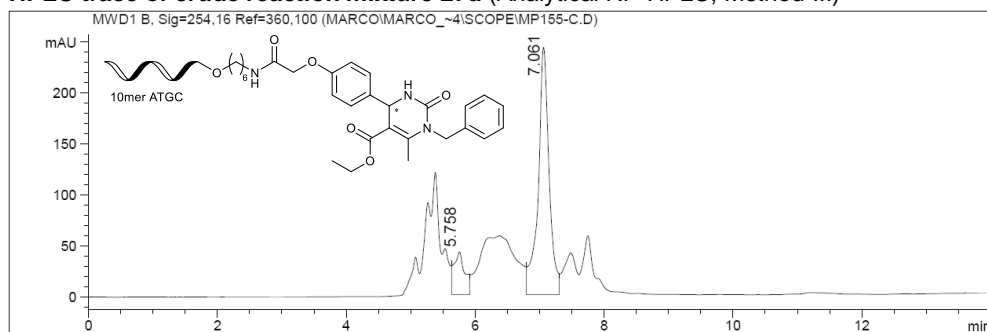

Peak list:

| Ret. Time | Width min | Height  | Area     | Area % |
|-----------|-----------|---------|----------|--------|
| 5.758     | 0.200     | 42.105  | 504.256  | 15.058 |
| 7.061     | 0.195     | 242.740 | 2844.499 | 84.942 |

**HPLC trace of isolated product 27d (Analytical RP-HPLC, Method-III)**

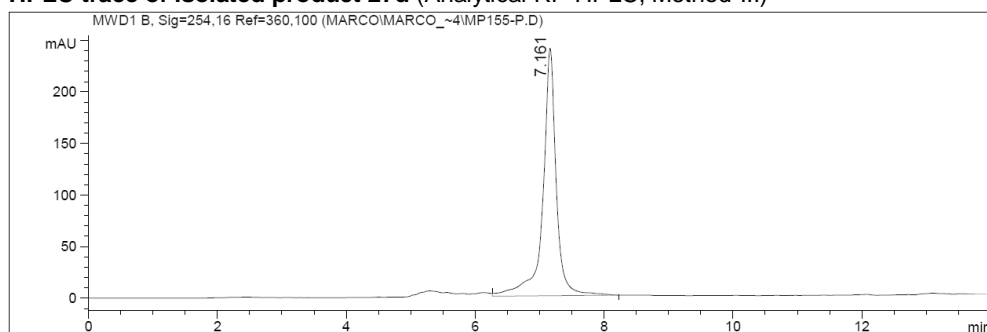

Peak list:

| Ret. Time | Width min | Height  | Area     | Area %  |
|-----------|-----------|---------|----------|---------|
| 7.161     | 0.206     | 240.100 | 3503.402 | 100.000 |

**MALDI-MS spectrum of isolated product 27d**

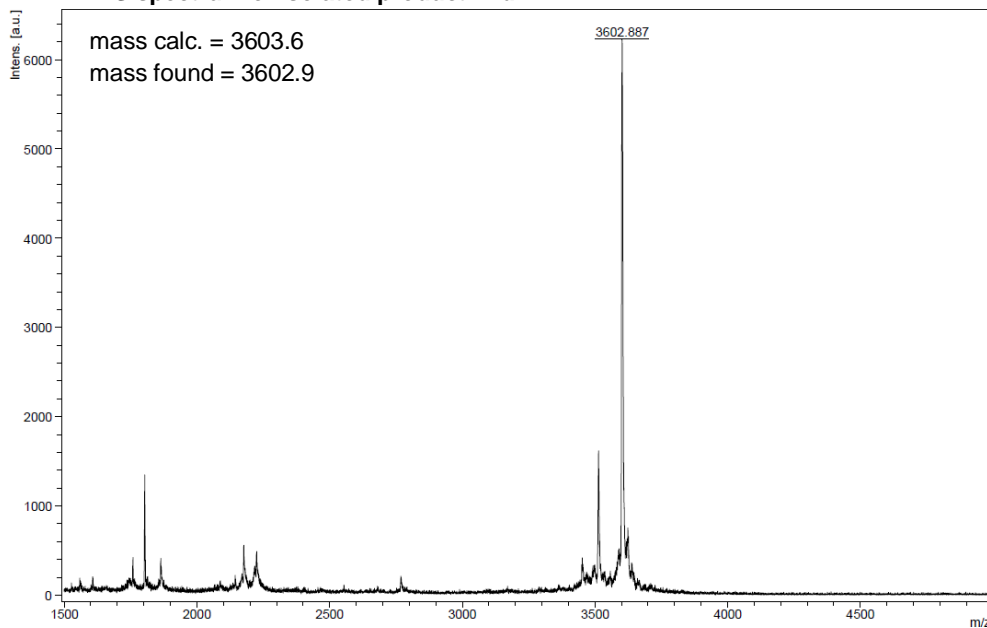

**DNA conjugate 27e:** CPG-coupled 10mer ATGC-aldehyde conjugate **15b** was reacted with urea **24a** and ethyl acetoacetate **25** according to RP-10.

#### HPLC trace of crude reaction mixture 27e (Analytical RP-HPLC, Method-II)

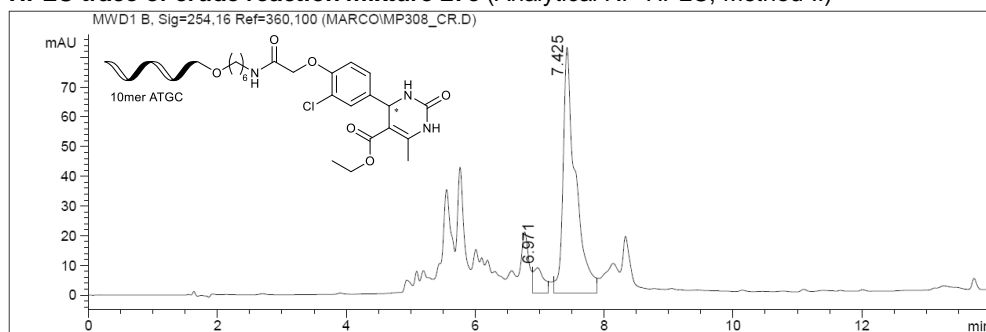

Peak list:

| Ret. Time | Width min | Height | Area     | Area % |
|-----------|-----------|--------|----------|--------|
| 6.971     | 0.178     | 8.538  | 91.303   | 7.685  |
| 7.425     | 0.221     | 82.818 | 1096.778 | 92.315 |

#### HPLC trace of isolated product 27e (Analytical RP-HPLC, Method-II)

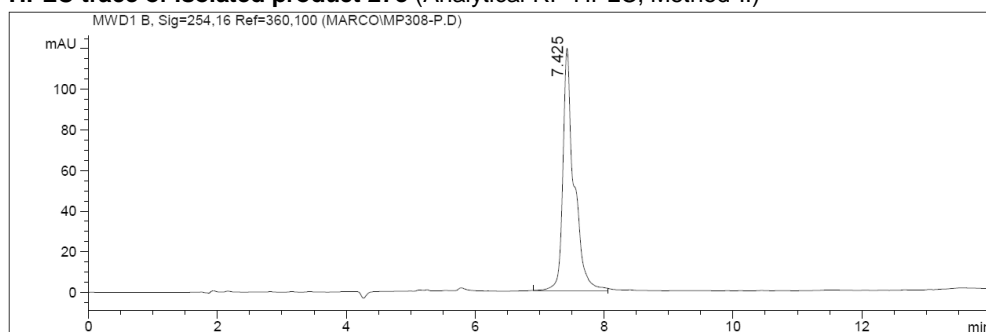

Peak list:

| Ret. Time | Width min | Height  | Area     | Area %  |
|-----------|-----------|---------|----------|---------|
| 7.425     | 0.199     | 119.402 | 1425.893 | 100.000 |

#### MALDI-MS spectrum of isolated product 27e

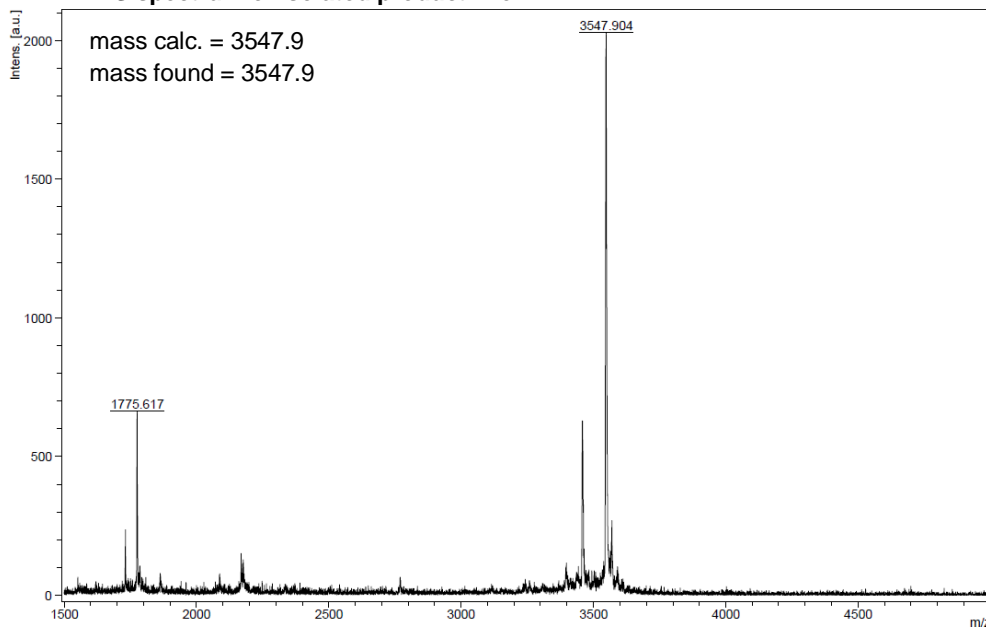

**DNA conjugate 27f:** CPG-coupled 10mer ATGC-aldehyde conjugate **15c** was reacted with urea **24a** and ethyl acetoacetate **25** according to RP-10.

**HPLC trace of crude reaction mixture 27f (Analytical RP-HPLC, Method-II)**

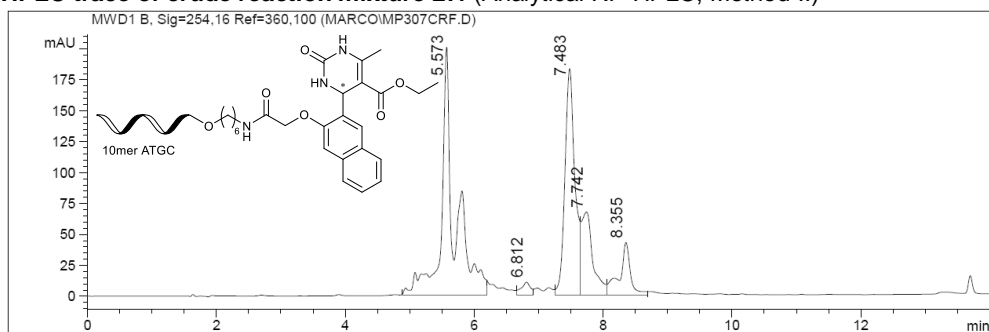

Peak list:

| Ret. Time | Width min | Height  | Area     | Area % |
|-----------|-----------|---------|----------|--------|
| 5.573     | 0.235     | 201.018 | 2834.301 | 45.431 |
| 6.812     | 0.165     | 10.104  | 100.238  | 1.607  |
| 7.483     | 0.179     | 183.128 | 1969.024 | 31.561 |
| 7.742     | 0.208     | 66.999  | 834.551  | 13.377 |
| 8.355     | 0.197     | 42.426  | 500.637  | 8.025  |

**MALDI-MS spectrum of crude reaction mixture 27f**

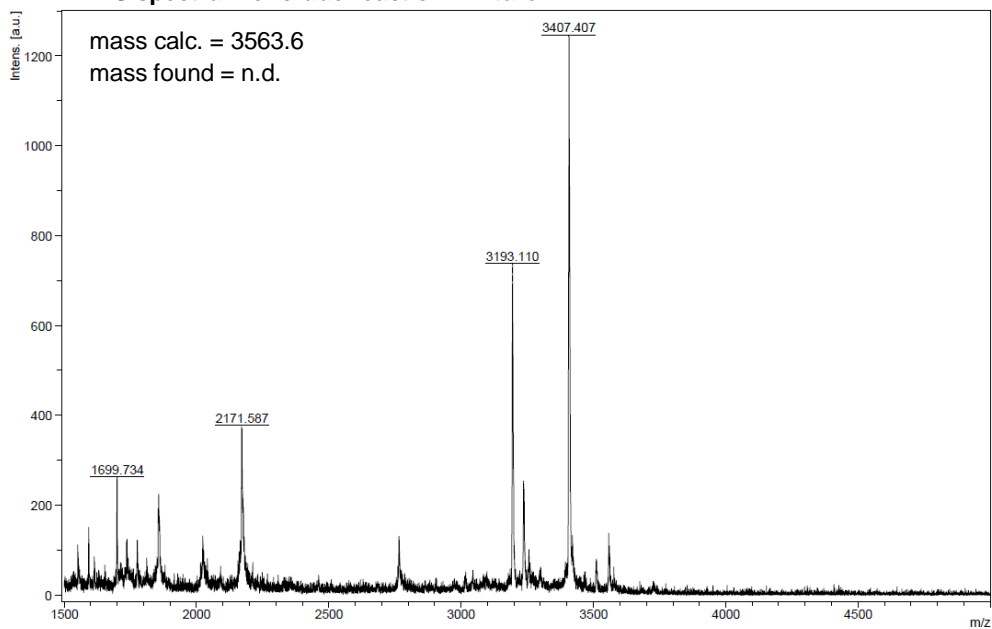

## Cheminformatic analysis

For library design, characterization and analysis the software KNIME<sup>1</sup> was used, with the following implemented extensions: RDKit, Indigo, ChemAxon, CDK, Vernalis.<sup>2</sup>

As a source database for the components required for the reactions, the Aldrich Market Select database (AMS)<sup>3</sup> was used and split in order to retrieve the different compound classes according to functional groups. Prior to the library design, the molecules in the AMS database were firstly standardized and filtered by molecular weight and number of unspecified stereocenters by RDKit Descriptor Calculation: the threshold was set to 200 Da for each compound class to ensure a reasonable size of the final product. In order to retrieve the different building block classes from the AMS, the RDKit Functional Group Filter or the Indigo node Substructure Match Counter combined with the Rule-based Row splitter were used, defining the substructure or the further filters by the ChemAxon Marvin Sketch node. We removed all aldehyde building blocks that contain the carboxylic acid moiety and/or bulky groups in *ortho* position to the carboxaldehyde and kept this compound class constant for the DA-1, P and B libraries. Further specific filters were applied to each compound class per each library depending on the experimental reactivity or on the presence of further functional groups which might lead to cross-reactivity. For the DA-1 library we removed heteroaromatic amines and anilines substituted with bulky *ortho*-substitution. For the DA-2 library, anilines with carboxylic acid amide or bulky groups in *ortho*-position were excluded, yet, all available aldehydes were included in the analysis. For the Povarov library the heteroaromatic amines were filtered out. For the Biginelli library, differently substituted ureas and  $\beta$ -ketoesters were used, but, in order to obtain libraries of comparable compound numbers, a further molecular weight filter was applied to starting materials (170 Da for ureas and esters) and products (450 Da).

All the building block classes were submitted to the RDKit Catalog filter node in order to remove compounds with unwanted reactivity.<sup>4</sup> For computational reasons and in order to obtain libraries of comparable sizes, larger building block datasets were sampled to 1000 molecules with the RDKit diversity picker (aldehydes and anilines). The reactions required for the *in silico* libraries were designed using a combination of RDKit node Two Component Reaction or Chemical Transformation, the Chemaxon Marvin Sketch for the reaction scheme and the SDF Files Reader for the different components. From the Enamine REAL database<sup>5</sup>, 500000 molecules were randomly sampled to obtain comparable data sets. We calculated the MQN descriptors for each compound of each library with the node RDKit Descriptors Calculation and, after Min-max normalization among the concatenated data of the libraries and the commercially available molecules, the PCA values were plotted in 3D scatter plots (Figure S3) using the Gnuplot<sup>6</sup> script, to visualize chemical diversity.

The PMIs were calculated with the corresponding Vernalis node, based on the 3D coordinates generated by RDKit Generate Coords node, to evaluate library shape diversity (Figure S4).

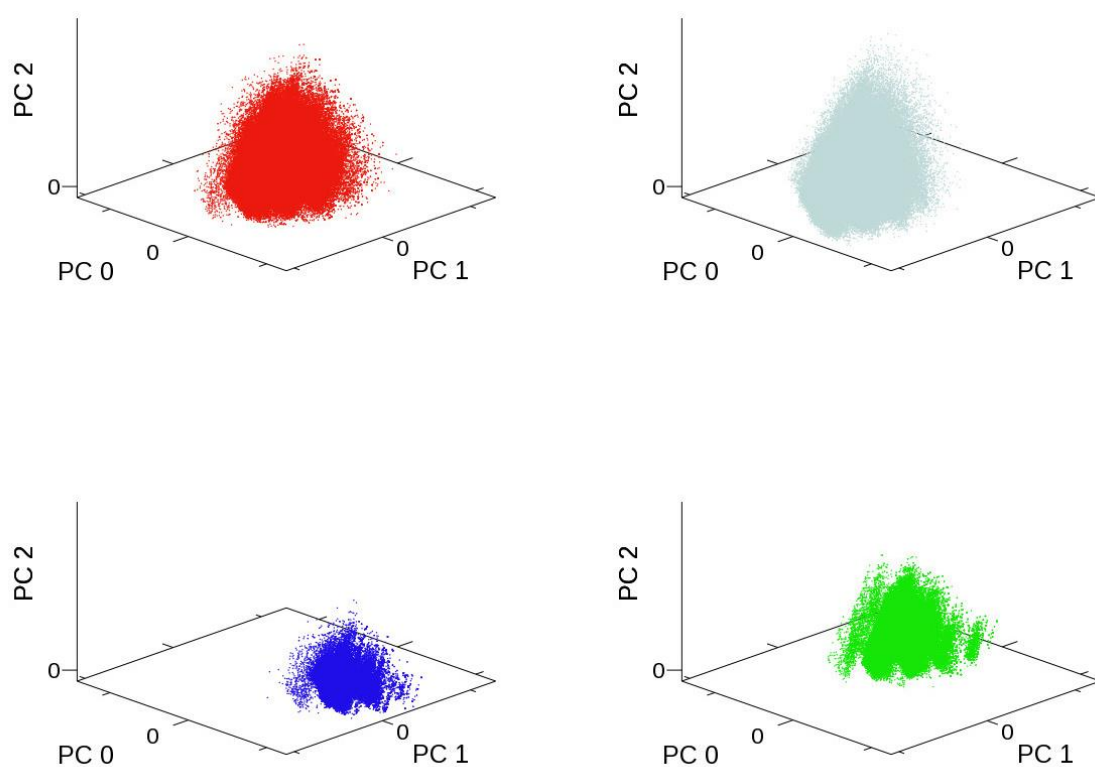

**Figure S3** PCA plots of the DA-1 (red), Enamine REAL sampled database (grey), P (blue) and B (green) libraries.

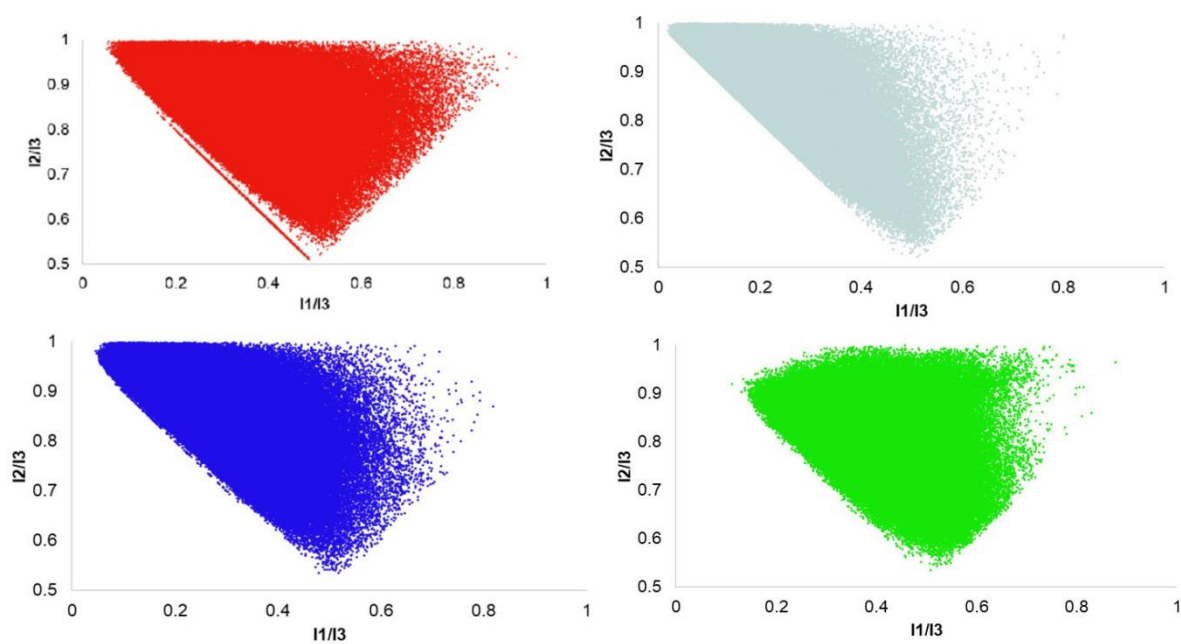

**Figure S4** PMI plots of the DA-1 (red), Enamine REAL sampled database (grey), P (blue) and B (green) libraries.

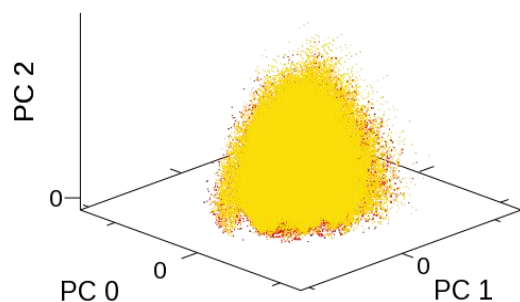

**Figure S5** PCA plots of the DA-1 (red) and DA-2 (yellow) libraries, covering almost identical chemical space.

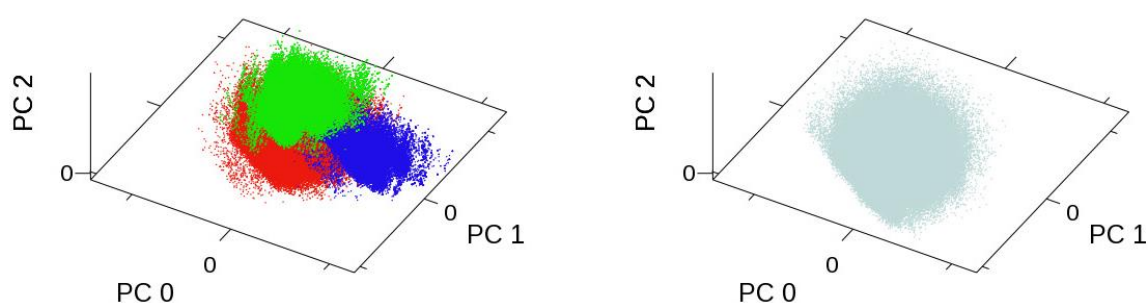

**Figure S6** PCA plots of the combined DA-1 (red), P (blue) and B (green) libraries vs Enamine REAL sampled database (grey), viewed from a different perspective.

## References:

1. <https://www.knime.com/downloads>
2. M. P. Mazanetz, R.J. Marmon, C. B.T. Reisser, I. Morao, *Curr. Top. Med. Chem.*, 2012, **12**, 1965-1979.
3. <https://www.sigmaaldrich.com/chemistry/chemistry-services/aldrich-market-select.html>
4. J. B. Baell, J. W. M. Nissink, *ACS Chem Biol.* 2018, **13**, 36-44.
5. <https://enamine.net/library-synthesis/real-compounds/real-compound-libraries>
6. <http://gnuplot.info>
